# Supplementary material for: Surprisal From Language Models Can Predict ERPs in Processing Predicate-Argument Structures Only if Enriched by an Agent Preference Principle
Source: PubMed Central journal article supplement (PMC11025647; doi:10.1162/nol_a_00121), 2024-04-01
Supplement: nol-5-1-167-s001.pdf [file nol-5-1-167-s001.pdf]

# Supplementary Information for “Surprisal from language models can predict ERPs in processing predicate-argument structures only if enriched by an Agent Preference principle”

Eva Huber<sup>a,b,+</sup>, Sebastian Sauppe<sup>a,b</sup>, Arrate Isasi-Isasmendi<sup>a,b</sup>, Ina Bornkessel-Schlesewsky<sup>c</sup>, Paola Merlo<sup>d,e</sup>, and Balthasar Bickel<sup>a,b</sup>

<sup>a</sup>Department of Comparative Language Science, University of Zurich, Affolternstrasse 56, 8050 Zurich, Switzerland

<sup>b</sup>Center for the Interdisciplinary Study of Language Evolution, University of Zurich, Affolternstrasse 56, 8050 Zurich, Switzerland

<sup>c</sup>Cognitive Neuroscience Laboratory, Australian Research Centre for Interactive and Virtual Environments, University of South Australia, GPO Box 2471, Adelaide, SA 5001, Australia

<sup>d</sup>Department of Linguistics, University of Geneva, 5 Rue De-Candolle, 1211 Genève 4, Switzerland

<sup>e</sup>University Center for Computer Science

August 29, 2023

## Contents

|          |                                               |            |
|----------|-----------------------------------------------|------------|
| <b>1</b> | <b>Language Models</b>                        | <b>2</b>   |
| <b>2</b> | <b>Analysis 1: Predicting Surprisal</b>       | <b>14</b>  |
| <b>3</b> | <b>Analysis 2: Predicting ERPs for German</b> | <b>117</b> |
| <b>4</b> | <b>Analysis 2: Predicting ERPs for Hindi</b>  | <b>149</b> |
| <b>5</b> | <b>Analysis 2: Predicting ERPs for Basque</b> | <b>179</b> |
| <b>6</b> | <b>Residual Slopes in ERP models</b>          | <b>212</b> |
| <b>7</b> | <b>Single Electrode Analyses</b>              | <b>228</b> |

# 1 Language Models

# S1: Estimating Surprisals with Language Models\*

Eva Huber      Sebastian Sauppe      Arrate Isasi-Isasmendi  
Ina Bornkessel-Schlesewsky      Paola Merlo      Balthasar Bickel

August 29, 2023

## S1 Language Models

We extract the surprisal values from two different types of models: 1) a Long-Short-Term-Model (LSTM) which is a variant of a Recurrent Neural Network (RNN) and 2) a transformer-based architecture.

### S1.1 LSTMs

We train a two-layer uni-directional LSTM for which we use the code provided by Gulordava et al. (2018). We tune several hyperparameters: size of the hidden layers (200 or 650, *HL size*), the batch size (20 or 64 (*batch size*)), dropout (0.1 or 0.2, *dropout*) and the learning rate (5 or 10, *LR*). Similarly to Gulordava et al. (2018), large hidden layers yield lower perplexity values.

#### S1.1.1 Training Data

| language | data source                                                                            | nr tokens train | nr tokens valid | nr tokens test |
|----------|----------------------------------------------------------------------------------------|-----------------|-----------------|----------------|
| Hindi    | Wikipedia dump and OSCAR (webcrawl) (Ortiz Suárez, Sagot, and Romary 2019)             | 100,362,268     | 15,918,937      | 9,169,274      |
| Basque   | Basque Multimedia Corpus (Agerri et al. 2020)                                          | 195,715,895     | 24,481,432      | 24,462,787     |
| German   | wikipedia dump of 2018, cleaned and provided by <i>t-systems-on-site-services-gmbh</i> | 189,647,309     | 23,718,786      | 23,686,839     |

#### S1.1.2 Hyperparameter Tuning

---

\*This document was rmarkdown::rendered from an Rmd script `main_scripts/language_models.Rmd` available at <https://osf.io/hbj67>

| Model | Language | Epochs | HL<br>size | batch_size | dropout | LR | valid_ppl    | test_ppl     |
|-------|----------|--------|------------|------------|---------|----|--------------|--------------|
| 1     | Hindi    | 10     | 200        | 20         | 0.1     | 5  | 61.68        | 46.8         |
| 2     | Hindi    | 10     | 200        | 20         | 0.1     | 10 | 65.25        | 50.38        |
| 3     | Hindi    | 10     | 200        | 20         | 0.2     | 5  | 67.38        | 52.11        |
| 4     | Hindi    | 10     | 200        | 20         | 0.2     | 10 | 72.11        | 57.07        |
| 5     | Hindi    | 10     | 200        | 64         | 0.1     | 5  | 60.51        | 46.11        |
| 6     | Hindi    | 10     | 200        | 64         | 0.1     | 10 | 60.92        | 46.49        |
| 7     | Hindi    | 10     | 200        | 64         | 0.2     | 5  | 66.72        | 51.82        |
| 8     | Hindi    | 10     | 200        | 64         | 0.2     | 10 | 67.17        | 52.19        |
| 9     | Hindi    | 10     | 650        | 20         | 0.1     | 5  | 41.64        | 30.34        |
| 10    | Hindi    | 10     | 650        | 20         | 0.1     | 10 | 47.89        | 35.92        |
| 11    | Hindi    | 10     | 650        | 20         | 0.2     | 5  | 43.58        | 32.42        |
| 12    | Hindi    | 10     | 650        | 20         | 0.2     | 10 | 53.85        | 41.59        |
| 13    | Hindi    | 10     | 650        | 64         | 0.1     | 5  | 41.57        | 30.36        |
| 14    | Hindi    | 10     | 650        | 64         | 0.1     | 10 | <b>40.7</b>  | <b>29.86</b> |
| 15    | Hindi    | 10     | 650        | 64         | 0.2     | 5  | 43.61        | 32.27        |
| 16    | Hindi    | 10     | 650        | 64         | 0.2     | 10 | 44.44        | 33.1         |
| 1     | German   | 10     | 200        | 20         | 0.1     | 5  | 51.37        | 51.24        |
| 2     | German   | 10     | 200        | 20         | 0.1     | 10 | 54.76        | 54.63        |
| 3     | German   | 10     | 200        | 20         | 0.2     | 5  | 54.38        | 54.25        |
| 4     | German   | 10     | 200        | 20         | 0.2     | 10 | 58.28        | 58.09        |
| 5     | German   | 10     | 200        | 64         | 0.1     | 5  | 50.92        | 50.8         |
| 6     | German   | 10     | 200        | 64         | 0.1     | 10 | 51.61        | 51.48        |
| 7     | German   | 10     | 200        | 64         | 0.2     | 5  | 54.28        | 54.14        |
| 8     | German   | 10     | 200        | 64         | 0.2     | 10 | 54.44        | 54.31        |
| 9     | German   | 10     | 650        | 20         | 0.1     | 5  | <b>38.52</b> | <b>38.46</b> |
| 10    | German   | 10     | 650        | 20         | 0.1     | 10 | 40.25        | 40.17        |
| 11    | German   | 10     | 650        | 20         | 0.2     | 5  | 39.45        | 39.37        |
| 12    | German   | 10     | 650        | 20         | 0.2     | 10 | 41.09        | 41.01        |
| 13    | German   | 10     | 650        | 64         | 0.1     | 5  | 38.76        | 38.68        |
| 14    | German   | 10     | 650        | 64         | 0.1     | 10 | 38.58        | 38.51        |
| 15    | German   | 10     | 650        | 64         | 0.2     | 5  | 39.64        | 39.56        |
| 16    | German   | 10     | 650        | 64         | 0.2     | 10 | 39.35        | 39.28        |
| 1     | Basque   | 10     | 200        | 20         | 0.1     | 5  | 104.31       | 103.84       |
| 2     | Basque   | 10     | 200        | 20         | 0.1     | 10 | 109.79       | 109.29       |
| 3     | Basque   | 10     | 200        | 20         | 0.2     | 5  | 110.12       | 109.62       |
| 4     | Basque   | 10     | 200        | 20         | 0.2     | 10 | 115.98       | 115.47       |
| 5     | Basque   | 10     | 200        | 64         | 0.1     | 5  | 103.37       | 102.91       |
| 6     | Basque   | 10     | 200        | 64         | 0.1     | 10 | 103.95       | 103.5        |
| 7     | Basque   | 10     | 200        | 64         | 0.2     | 5  | 109.57       | 109.07       |
| 8     | Basque   | 10     | 200        | 64         | 0.2     | 10 | 109.88       | 109.38       |
| 9     | Basque   | 10     | 650        | 20         | 0.1     | 5  | 82.61        | 82.29        |
| 10    | Basque   | 10     | 650        | 20         | 0.1     | 10 | 86.12        | 85.75        |
| 11    | Basque   | 10     | 650        | 20         | 0.2     | 5  | 84.54        | 84.18        |
| 12    | Basque   | 10     | 650        | 20         | 0.2     | 10 | 87.97        | 87.59        |
| 13    | Basque   | 10     | 650        | 64         | 0.1     | 5  | 82.98        | 82.61        |
| 14    | Basque   | 10     | 650        | 64         | 0.1     | 10 | <b>82.48</b> | <b>82.14</b> |
| 15    | Basque   | 10     | 650        | 64         | 0.2     | 5  | 84.97        | 84.6         |
| 16    | Basque   | 10     | 650        | 64         | 0.2     | 10 | 84.2         | 83.85        |

The perplexities for German and Hindi are comparable, however the perplexity for Basque is considerably higher. Recent work showed that more powerful language models estimate N400 amplitudes more accurately



Wilcox et al. (2020), however Goodkind and Bicknell (2018) has also found that at least for eye-tracking data, even basic n-gram models estimate surprisal values show linear relationships to reading time.

## S1.2 Transformers: BERT/RoBERTa

- Hindi: *Indic-Transformers Hindi BERT*
  - provided by Neural Space, accessed on HuggingFace
  - trained on ~3 GB of monolingual training corpus, mainly taken from OSCAR
  - BERT architecture
- Basque: *ixa-ehu/roberta-eus-euscrawl-large-cased*
  - published as part of Artetxe et al. (2022) and accessed on HuggingFace
  - trained on the Euscrawl, a corpus created using tailored crawling from Basque sites (12,528k documents and 423M tokens)
  - architecture RoBERTa, an architecture that builds on BERT and modifies key hyperparameters. Next-sentence pretraining objective is removed and the training is done with much larger mini-batches and learning rates, leading to performance gains and reducing computational expense
- German: *bert-base-german-cased*
  - provided by deepset, accessed on HuggingFace
  - trained on Wikipedia dump, OpenLegalData dump and news articles (~12 GB of data)
  - BERT architecture

## S1.3 Transformers: GPT-2

- German: *dbmdz/german-gpt2*
  - Wikipedia dump, EU Bookshop corpus, Open Subtitles, CommonCrawl, ParaCrawl and News Crawl. (16GB and 2,350,234,427 tokens)
- Basque: *ClassCat/gpt2-small-basque-v2*
  - Subset of CC-100/eu and Oscar (creators do not disclose data size)

### S1.3.1 Hindi GPT-2

No pretrained Hindi GPT-2 model is available, which is why we trained our own model. We follow Vries and Nissim (2021)’s training scheme, which is well-suited if computational power and training data is scarce. The training process starts from the English GPT-2 model and unfolds over two steps. In the first, we trained a new tokenizer on the Hindi training dataset and then only the lexical embeddings are trained while the other layers are frozen. In the second, step the entire model is trained. The model was trained on four NVIDIA A100 Tensor Core GPUs for four days. The training data consists of Hindi wikipedia and crawl data from OSCAR (Ortiz Suárez, Sagot, and Romary 2019), resulting in approximately 6.5 GB of data.

## S1.4 Grammaticality Test

In order to evaluate the language models’ knowledge of the language, we test their capability of distinguishing between sentences with grammatically incorrect word orders and sentences with grammatically correct word orders.

The permuted (i.e. grammatically incorrect) sentences consist of several variants of syntactically incorrect word orders. We calculate the average word surprisal per sentence. After that the surprisal of the correct

sentence is subtracted from the surprisal of the incorrect sentences (*Delta Surprisal*). Thus, if a model assigns higher surprisal to “wrong” sentences (which is desired from a language model), the final value would be positive.

The files including grammatical and ungrammatical can be found in the folder ‘grammaticality\_test’. The results can be found in the folder ‘result’.

### S1.4.1 German

```
de.lstm <- read.csv('../results/grammaticality_german_lstm.txt',
                  sep='\t', col.names = c('sent_id', 'word', 'surprisal', 'scrambled')) %>%
  separate(sent_id, c('sent_id', 'cond'), sep=':') %>%
  unite(sent_id, c('sent_id', 'scrambled'), sep=':', remove=F)

# calculate mean surprisal value per sentence and subtract correct
# sentence from incorrect sentence

de.lstm.mean <- de.lstm %>%
  group_by(sent_id, scrambled, cond) %>%
  summarise(surprisal_mean = mean(surprisal)) %>%
  ungroup() %>%
  separate(sent_id, c('sent_id', 'scrambled'), sep=':') %>%
  pivot_wider(names_from = scrambled, values_from = surprisal_mean) %>%
  mutate(diff = false - true) %>%
  mutate(model = 'LSTM')

de.bert <- read.table('../results/grammaticality_german_bert.csv',
                    sep='\t', col.names = c('sent_id', 'word', 'surprisal')) %>%
  filter(surprisal > 0) %>%
  separate(sent_id, c('sent_id', 'cond', 'original'), sep=':')

# calculate mean surprisal value per sentence and subtract correct sentence
# from incorrect sentence
de.bert.mean <- de.bert %>%
  group_by(sent_id, cond, original) %>%
  summarise(surprisal_mean = mean(surprisal)) %>%
  ungroup() %>%
  pivot_wider(names_from = original, values_from = surprisal_mean) %>%
  mutate(diff = false - true) %>%
  mutate(model = 'BERT/RoBERTa')

de.gpt <- read.table('../results/grammaticality_german_gpt.csv', sep='\t',
                    header=T) %>%
  rename(word = cond) %>%
  separate(sent_id, c('sent_id', 'cond', 'original'), sep=':') %>%
  filter(surprisal > 0)

# calculate mean surprisal value per sentence and subtract correct sentence
# from incorrect sentence
de.gpt.mean <- de.gpt %>%
  group_by(sent_id, cond, original) %>%
  summarise(surprisal_mean = mean(surprisal)) %>%
```

```

ungroup() %>%
pivot_wider(names_from = original, values_from = surprisal_mean) %>%
mutate(diff = false - true) %>%
mutate(model = 'GPT-2')

```

## S1.4.2 Hindi

```

hi.lstm <- read.csv('../results/grammaticality_hindi_lstm.txt', sep='\t',
                   col.names = c('sent_id', 'word', 'surprisal', 'scrambled')) %>%
  separate(sent_id, c('sent_id', 'cond'), sep=':') %>%
  unite(sent_id, c('sent_id', 'scrambled'), sep=':', remove=F)

# calculate mean surprisal value per sentence and subtract correct
# sentence from incorrect sentence
hi.lstm.mean <- hi.lstm %>%
  group_by(sent_id, scrambled) %>%
  summarise(surprisal_mean = mean(surprisal)) %>%
  ungroup() %>%
  separate(sent_id, c('sent_id', 'scrambled'), sep=':') %>%
  pivot_wider(names_from = scrambled, values_from = surprisal_mean) %>%
  mutate(diff = false - true) %>%
  mutate(model = 'LSTM')

hi.bert <- read.table('../results/grammaticality_hindi_bert.csv',
                     sep='\t', col.names = c('sent_id', 'cond', 'scrambled', 'word', 'surprisal')) %>%
  filter(surprisal > 0)

# calculate mean surprisal value per sentence and subtract correct sentence
# from incorrect sentence
hi.bert.mean <- hi.bert %>%
  group_by(sent_id, cond, scrambled) %>%
  summarise(surprisal_mean = mean(surprisal)) %>%
  ungroup() %>%
  pivot_wider(names_from = scrambled,
              values_from = surprisal_mean) %>%
  mutate(diff = false - true) %>%
  mutate(model = 'BERT/RoBERTa')

hi.gpt <- read.table('../results/grammaticality_hindi_gpt.csv',
                     sep='\t', col.names = c('sent_id', 'cond', 'scrambled', 'word', 'surprisal')) %>%
  filter(surprisal > 0)

# calculate mean surprisal value per sentence and subtract correct sentence
# from incorrect sentence
hi.gpt.mean <- hi.gpt %>%
  group_by(sent_id, cond, scrambled) %>%
  summarise(surprisal_mean = mean(surprisal)) %>%
  ungroup() %>%
  pivot_wider(names_from = scrambled, values_from = surprisal_mean) %>%

```

```
mutate(diff = false - true) %>%
mutate(model = 'GPT-2')
```

### S1.4.3 Basque

```
eu.lstm <- read.csv('../results/grammaticality_basque_lstm.txt', sep='\t',
                    col.names = c('sent_id', 'word', 'surprisal', 'scrambled')) %>%
  separate(sent_id, c('sent_id', 'cond'), sep=':') %>%
  unite(sent_id, c('sent_id', 'scrambled'), sep=':', remove=F)

# calculate mean surprisal value per sentence and subtract correct
# sentence from incorrect sentence
eu.lstm.mean <- eu.lstm %>%
  group_by(sent_id, scrambled, cond) %>%
  summarise(surprisal_mean = mean(surprisal)) %>%
  ungroup() %>%
  separate(sent_id, c('sent_id', 'scrambled'), sep=':') %>%
  pivot_wider(names_from = scrambled, values_from = surprisal_mean) %>%
  mutate(diff = false - true) %>%
  mutate(model = 'LSTM')

eu.roberta <- read.table('../results/grammaticality_basque_roberta.csv',
                        sep='\t', col.names = c('sent_id', 'cond', 'scrambled',
                                                'word', 'surprisal')) %>%

  filter(surprisal > 0)
# calculate mean surprisal value per sentence and subtract correct
# sentence from incorrect sentence

eu.roberta.mean <- eu.roberta %>%
  group_by(sent_id, cond, scrambled) %>%
  summarise(surprisal_mean = mean(surprisal)) %>%
  ungroup() %>%
  pivot_wider(names_from = scrambled, values_from = surprisal_mean) %>%
  mutate(diff = false - true) %>%
  mutate(model = 'BERT/RoBERTa')

eu.gpt<- read.table('../results/grammaticality_basque_gpt.csv', sep='\t',
                    col.names = c('sent_id', 'cond', 'scrambled', 'word', 'surprisal')) %>%
  filter(surprisal > 0)
# calculate mean surprisal value per sentence and subtract correct sentence
# from incorrect sentence
eu.gpt.mean <- eu.gpt %>%
  group_by(sent_id, cond, scrambled) %>%
  summarise(surprisal_mean = mean(surprisal)) %>%
  ungroup() %>%
  pivot_wider(names_from = scrambled, values_from = surprisal_mean) %>%
  mutate(diff = false - true) %>%
  mutate(model = 'GPT-2')
```

#### S1.4.4 Model

For each language and language model, we fit a Bayesian regression model to estimate the Delta Surprisal difference, controlling for differences in sentences.

```
de.lstm.mean$sent_id <- paste(de.lstm.mean$sent_id, de.lstm.mean$cond, sep='_')
de.bert.mean$sent_id <- paste(de.bert.mean$sent_id, de.bert.mean$cond, sep='_')
de.gpt.mean$sent_id <- paste(de.gpt.mean$sent_id, de.gpt.mean$cond, sep='_')

de.model.lstm <- brm(diff ~ 1 + (1|sent_id),
  data=de.lstm.mean,
  file = '../models/grammaticality_de_lstm')

de.model.tr <- brm(diff ~ 1 + (1|sent_id),
  data=de.bert.mean,
  file = '../models/grammaticality_de_bert')
de.model.gpt <- brm(diff ~ 1 + (1|sent_id),
  data=de.gpt.mean,
  file = '../models/grammaticality_de_gpt')

samps.de.lstm <- posterior_samples(de.model.lstm) %>% mutate(model = 'LSTM') %>%
  mutate(language = 'German') %>% select(language, model, b_Intercept)
samps.de.bert <- posterior_samples(de.model.tr) %>% mutate(model = 'BERT/RoBERTa') %>%
  mutate(language = 'German') %>% select(language, model, b_Intercept)
samps.de.gpt <- posterior_samples(de.model.gpt) %>% mutate(model = 'GPT-2') %>%
  mutate(language = 'German') %>% select(language, model, b_Intercept)

hi.lstm.mean$sent_id <- paste(hi.lstm.mean$sent_id, hi.lstm.mean$cond, sep='_')
hi.bert.mean$sent_id <- paste(hi.bert.mean$sent_id, hi.bert.mean$cond, sep='_')
hi.gpt.mean$sent_id <- paste(hi.gpt.mean$sent_id, hi.gpt.mean$cond, sep='_')

hi.model.lstm <- brm(diff ~ 1 + (1|sent_id),
  data = hi.lstm.mean,
  file = '../models/grammaticality_hi_lstm')

hi.model.tr <- brm(diff ~ 1 + (1|sent_id),
  data = hi.bert.mean,
  file = '../models/grammaticality_hi_tr')

hi.model.gpt <- brm(diff ~ 1 + (1|sent_id),
  data = hi.gpt.mean,
  file = '../models/grammaticality_hi_gpt')

samps.hi.lstm <- posterior_samples(hi.model.lstm) %>% mutate(model = 'LSTM') %>%
  mutate(language = 'Hindi') %>% select(language, model, b_Intercept)
samps.hi.bert <- posterior_samples(hi.model.tr) %>% mutate(model = 'BERT/RoBERTa') %>%
  mutate(language = 'Hindi') %>% select(language, model, b_Intercept)
samps.hi.gpt <- posterior_samples(hi.model.gpt) %>% mutate(model = 'GPT-2') %>%
  mutate(language = 'Hindi') %>% select(language, model, b_Intercept)

eu.lstm.mean$sent_id <- paste(eu.lstm.mean$sent_id, eu.lstm.mean$cond, sep='_')
eu.roberta.mean$sent_id <- paste(eu.roberta.mean$sent_id, eu.roberta.mean$cond, sep='_')
```

```

eu.gpt.mean$sent_id <- paste(eu.gpt.mean$sent_id, eu.gpt.mean$cond, sep='_')

eu.model.lstm <- brm(diff ~ 1 + (1|sent_id),
  data = eu.lstm.mean,
  file = '../models/grammaticality_eu_lstm')

eu.model.tr <- brm(diff ~ 1 + (1|sent_id),
  data = eu.roberta.mean,
  file = '../models/grammaticality_eu_tr')
eu.model.gpt <- brm(diff ~ 1 + (1|sent_id),
  data = eu.gpt.mean,
  file = '../models/grammaticality_eu_gpt')

samps.eu.lstm <- posterior_samples(eu.model.lstm) %>% mutate(model = 'LSTM') %>%
  mutate(language = 'Basque') %>% select(language, model, b_Intercept)
samps.eu.bert <- posterior_samples(eu.model.tr) %>% mutate(model = 'BERT/RobERTa') %>%
  mutate(language = 'Basque') %>% select(language, model, b_Intercept)
samps.eu.gpt <- posterior_samples(eu.model.gpt) %>% mutate(model = 'GPT-2') %>%
  mutate(language = 'Basque') %>% select(language, model, b_Intercept)

```

```

all.diff <- rbind(samps.de.lstm, samps.de.bert, samps.de.gpt,
  samps.hi.lstm, samps.hi.bert, samps.hi.gpt,
  samps.eu.lstm, samps.eu.bert, samps.eu.gpt)

```

```

all.diff$language <- factor(all.diff$language, levels=c("German","Hindi","Basque"))

```

```

diff.plot <- all.diff %>%
  ggplot(aes(x=b_Intercept, fill= model, color = model)) +
  stat_slab(alpha = .5, normalize = 'groups') +
  stat_pointinterval(position = position_dodge(width = .2, preserve = "single"), .width = c(.50,.80,.90),
  ylab("") +
  xlab(expression(paste(Delta," Surprisal between ungrammatical and grammatical sentence")))) +
  scale_color_brewer(palette = 'Set2') +
  scale_fill_brewer(palette = 'Set2') +
  geom_vline(xintercept = 0, linetype="dashed") +
  theme(panel.grid = element_blank(), panel.border = element_blank(),
  axis.line.x = element_line(size = 1), axis.ticks.y = element_blank(),
  axis.text.y = element_blank(), #element_text(family = 'Arial Unicode MS', size = 12),
  axis.title.x = element_text( size = 16),
  axis.text.x = element_text(size = 12),
  plot.title = element_text(size=22),
  plot.background = element_rect(fill = "transparent", colour = NA),
  strip.text.x = element_text(size = 15)) +
  facet_wrap(~language, ncol = 1) +
  scale_y_discrete(expand = c(0, 0.5))

```

```

diff.plot

```

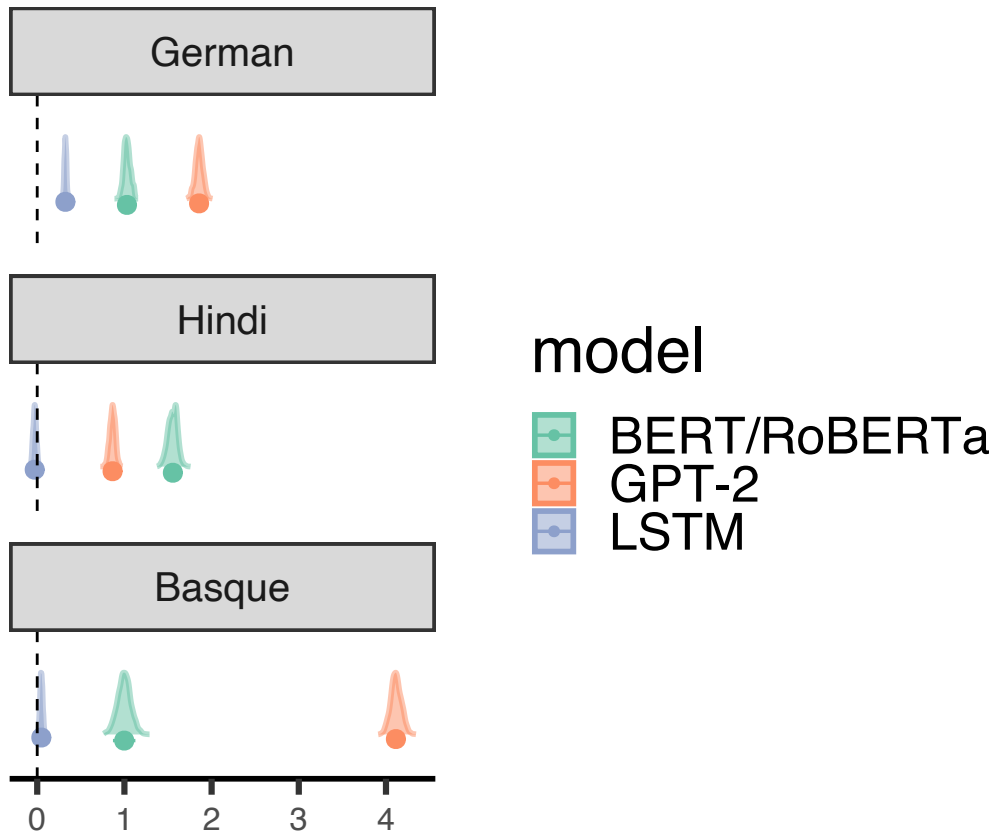

tween ungrammatical and grammatical sentence

```

ci <- rbind(samps.de.lstm %>%
  bayestestR::ci(ci=0.89, method='HDI') %>%
  mutate(language = 'German') %>%
  mutate(model = 'LSTM'),
samps.de.bert %>%
  bayestestR::ci(ci=0.89, method='HDI') %>%
  mutate(language = 'German') %>%
  mutate(model = 'BERT'),
samps.de.gpt %>%
  bayestestR::ci(ci=0.89, method='HDI') %>%
  mutate(language = 'German') %>%
  mutate(model = 'GPT'),
samps.hi.lstm %>%
  bayestestR::ci(ci=0.89, method='HDI') %>%
  mutate(language = 'Hindi') %>%
  mutate(model = 'LSTM'),
samps.hi.bert %>%
  bayestestR::ci(ci=0.89, method='HDI') %>%
  mutate(language = 'Hindi') %>%
  mutate(model = 'BERT'),
samps.hi.gpt %>%
  bayestestR::ci(ci=0.89, method='HDI') %>%
  mutate(language = 'Hindi') %>%
  mutate(model = 'GPT'),
samps.eu.lstm %>%

```

```

      bayestestR::ci(ci=0.89, method='HDI') %>%
      mutate(language = 'Basque') %>%
      mutate(model = 'LSTM'),
samps.eu.bert %>%
      bayestestR::ci(ci=0.89, method='HDI') %>%
      mutate(language = 'Basque') %>%
      mutate(model = 'RoBERTa'),
samps.eu.gpt %>%
      bayestestR::ci(ci=0.89, method='HDI') %>%
      mutate(language = 'Basque') %>%
      mutate(model = 'GPT'))

means <- rbind(samps.de.lstm %>%
  summarise(Mean = mean(b_Intercept)),
samps.de.bert %>%
  summarise(Mean = mean(b_Intercept)),
samps.de.gpt %>%
  summarise(Mean = mean(b_Intercept)),
samps.hi.lstm %>%
  summarise(Mean = mean(b_Intercept)),
samps.hi.bert %>%
  summarise(Mean = mean(b_Intercept)),
samps.hi.gpt %>%
  summarise(Mean = mean(b_Intercept)),
samps.eu.lstm %>%
  summarise(Mean = mean(b_Intercept)),
samps.eu.bert %>%
  summarise(Mean = mean(b_Intercept)),
samps.eu.gpt %>%
  summarise(Mean = mean(b_Intercept)))

means.ci <- cbind(ci, means)
col.order <- c('model', 'language', 'Mean', 'CI_low', 'CI_high')
means.ci <- means.ci[,col.order]

means.ci %>%
  kable(., digits = 1:4, booktabs = T, linesep = "",
        caption = "Means and 89 percent credibility intervals of Delta Surprisal
for each language and language model") %>%
  kable_styling(font_size = 10, latex_options = 'hold_position')

```



Table S3: Means and 89 percent credibility intervals of Delta Surprisal for each language and language model

| model   | language | Mean   | CI_low  | CI_high |
|---------|----------|--------|---------|---------|
| LSTM    | German   | 0.323  | 0.3044  | 0.3     |
| BERT    | German   | 1.031  | 0.9754  | 1.1     |
| GPT     | German   | 1.856  | 1.7931  | 1.9     |
| LSTM    | Hindi    | -0.029 | -0.0585 | 0.0     |
| BERT    | Hindi    | 1.554  | 1.4625  | 1.6     |
| GPT     | Hindi    | 0.864  | 0.8115  | 0.9     |
| LSTM    | Basque   | 0.047  | 0.0251  | 0.1     |
| RoBERTa | Basque   | 0.997  | 0.8630  | 1.1     |
| GPT     | Basque   | 4.116  | 4.0140  | 4.2     |

## References

- Aggeri, Rodrigo, Iñaki San Vicente, Jon Ander Campos, Ander Barrena, Xabier Saralegi, Aitor Soroa, and Eneko Agirre. 2020. “Give Your Text Representation Models Some Love: The Case for Basque.” In, 4781–88. European Language Resources Association. <https://aclanthology.org/2020.lrec-1.588>.
- Artetxe, Mikel, Itziar Aldabe, Rodrigo Aggeri, Olatz Perez-de-Viñaspre, and Aitor Soroa. 2022. “Does Corpus Quality Really Matter for Low-Resource Languages?” *arXiv Preprint arXiv:2203.08111*.
- Goodkind, Adam, and Klinton Bicknell. 2018. “Predictive Power of Word Surprisal for Reading Times Is a Linear Function of Language Model Quality.” In *Proceedings of the 8th Workshop on Cognitive Modeling and Computational Linguistics (CMCL 2018)*, 10–18.
- Gulordava, Kristina, Piotr Bojanowski, Edouard Grave, Tal Linzen, and Marco Baroni. 2018. “Colorless Green Recurrent Networks Dream Hierarchically.” *arXiv Preprint arXiv:1803.11138*.
- Ortiz Suárez, Pedro Javier, Benoît Sagot, and Laurent Romary. 2019. “Asynchronous Pipelines for Processing Huge Corpora on Medium to Low Resource Infrastructures.” In, edited by Piotr Bański, Adrien Barbaresi, Hanno Biber, Evelyn Breiteneder, Simon Clematide, Marc Kupietz, Harald Lungen, and Caroline Iliadi, 9–16. Proceedings of the Workshop on Challenges in the Management of Large Corpora (CMLC-7) 2019. Cardiff, 22nd July 2019. Mannheim: Leibniz-Institut für Deutsche Sprache. <https://doi.org/10.14618/ids-pub-9021>.
- Vries, Wietse de, and Malvina Nissim. 2021. “As Good as New. How to Successfully Recycle English GPT-2 to Make Models for Other Languages.” In *Findings of the Association for Computational Linguistics: ACL-IJCNLP 2021*, 836–46. Online: Association for Computational Linguistics. <https://doi.org/10.18653/v1/2021.findings-acl.74>.
- Wilcox, Ethan Gotlieb, Jon Gauthier, Jennifer Hu, Peng Qian, and Roger Levy. 2020. “On the Predictive Power of Neural Language Models for Human Real-Time Comprehension Behavior.” *arXiv Preprint arXiv:2006.01912*.

## 2 Analysis 1: Predicting Surprisal

# S2: Study 1: Predicting Surprisal\*

Eva Huber      Sebastian Sauppe      Arrate Isasi-Isasmendi  
Ina Bornkessel-Schlesewsky      Paola Merlo      Balthasar Bickel

August 29, 2023

## Contents

|                                               |          |
|-----------------------------------------------|----------|
| <b>S3 Predicting Surprisal</b>                | <b>1</b> |
| S3.1 Data Preprocessing . . . . .             | 1        |
| S3.2 Models: Estimates of Surprisal . . . . . | 10       |
| S3.3 Posterior Distributions . . . . .        | 52       |
| S3.4 Plots . . . . .                          | 74       |
| S3.5 T-tests . . . . .                        | 95       |

**REPRODUCIBILITY STATEMENT:** All of the models included here were fitted on an M1 processor using R Version 4.2.2 and brms version 2.14.0.

## S3 Predicting Surprisal

### S3.1 Data Preprocessing

All files are preprocessed with ‘/data\_preprocessing.R’.

The data below includes the predicted surprisal at each word in the stimuli estimated with LSTMs, (Ro)BERT(A) and a GPT.

Since we exclude stimuli with out-of-vocabulary items up to and including the target word (critical region) for LSTM models, we replaced the oov sentences with words that occur in the vocabulary and are appropriate replacements for the oov-words (called ‘extended stimuli’). This is to ensure that the lower number of stimuli for LSTMs does not skew the results in any direction. For (Ro)BERT(A) and GPT, no original stimuli have to be excluded, but we nevertheless estimate the extended stimuli with RoBERTA as a proof of concept to ensure that the change in words does not lead to a change in surprisal values associated with the conditions. For each stimuli set, we extract the surprisal values at each word. For the models below, we only keep the word at the critical region, i.e. the surprisal value at the main verb. ### German

#### Original stimuli, surprisal estimated by LSTM

```
# some preprocessing

mapping <- read.csv('../stimuli/german_sent_id_mappings.csv', sep=',') %>% select(sent_id, new_sent)
info.original <- read.csv('../data_experiments/german_original_nouns_verbs.csv', sep='\t') %>%
  separate(cond, c('verb.type', 'first.NP'), sep='_', remove=F) %>%
  left_join(mapping, by='sent_id') %>%
  select(-sent_id) %>%
```

\*This document was `rmarkdown::render`ed from an R script ‘main\_scripts/analysis1’ available at <https://osf.io/hbj67>

```

dplyr::rename(sent_id = new_sent)

de.lstm.original <- read.csv('../results/german_LSTM_original_prep.csv' , sep='\t') %>%
  left_join(mapping, by='sent_id') %>%
  select(-sent_id) %>%
  dplyr::rename(sent_id = new_sent)

de.lstm.original.m <- de.lstm.original %>%
  filter(region %in% 'AUX') %>% # filter surprisal value at critical region
  left_join(info.original, by=c('sent_id', 'first.NP', 'verb.type'))

```

### Extended stimuli, surprisal estimated by LSTM

```

de.lstm.extended <- read.csv('../results/german_LSTM_extended_prep.csv',
                             sep='\t') %>%
  left_join(mapping, by='sent_id') %>%
  select(-sent_id) %>%
  dplyr::rename(sent_id = new_sent)

de.lstm.extended.m <- de.lstm.extended %>%
  filter(region %in% 'AUX') %>% # filter surprisal value at critical region
  left_join(info.original, by=c('sent_id', 'first.NP', 'verb.type'))

```

### Original stimuli, surprisal estimated by BERT

```

de.tr.original <- read.csv('../results/german_transformer_original_prep.csv',
                             sep='\t') %>%
  left_join(mapping, by='sent_id') %>%
  select(-sent_id) %>%
  dplyr::rename(sent_id = new_sent)

de.tr.original.m <- de.tr.original %>%
  filter(region %in% 'AUX') %>% # filter surprisal value at critical region
  left_join(info.original, by=c('sent_id', 'first.NP', 'verb.type'))

```

### Extended stimuli, surprisal estimated by BERT

```

de.tr.extended <- read.csv('../results/german_transformer_extended_prep.csv',
                             sep='\t') %>%
  left_join(mapping, by='sent_id') %>%
  select(-sent_id) %>%
  dplyr::rename(sent_id = new_sent)

de.tr.extended.m <- de.tr.extended %>%
  filter(region %in% 'AUX') %>% # filter surprisal value at critical region
  left_join(info.original, by=c('sent_id', 'first.NP', 'verb.type'))

```

```

de.tr.extended.m$verb.type <- as.factor(paste(de.tr.extended.m$verb.type))
de.tr.extended.m$first.NP <- as.factor(paste(de.tr.extended.m$first.NP))
de.tr.extended.m$surprisal <- as.numeric(paste(de.tr.extended.m$surprisal))
de.tr.extended.m$sent_id <- as.factor(paste(de.tr.extended.m$sent_id))

```

```
de.tr.extended.m$first.NP <- relevel(de.tr.extended.m$first.NP, ref='subject')
```

### Original stimuli, surprisal estimated by GPT-2

```
de.gpt.original <- read.csv('../results/german_gpt_original_prep.csv', sep='\t') %>%
  left_join(mapping, by='sent_id') %>%
  select(-sent_id) %>%
  dplyr::rename(sent_id = new_sent)

de.gpt.original.m <- de.gpt.original %>%
  separate(cond, c('verb.type', 'first.NP'), sep='_')

de.gpt.original.m$verb.type <- as.factor(paste(de.gpt.original.m$verb.type))
de.gpt.original.m$first.NP <- as.factor(paste(de.gpt.original.m$first.NP))
de.gpt.original.m$surprisal <- as.numeric(paste(de.gpt.original.m$surprisal))
de.gpt.original.m$sent <- as.factor(paste(de.gpt.original.m$sent_id))

de.gpt.original.m$first.NP <- relevel(de.gpt.original.m$first.NP, ref='subject')

contrasts(de.gpt.original.m$first.NP)
```

```
##      object
## subject    0
## object    1
```

```
contrasts(de.gpt.original.m$verb.type)
```

```
##      dat
## acc   0
## dat   1
```

### Extended stimuli, surprisal estimated by GPT-2

```
de.gpt.extended <- read.csv('../results/german_gpt_extended_prep.csv',
                             sep='\t') %>%
  left_join(mapping, by='sent_id') %>%
  select(-sent_id) %>%
  dplyr::rename(sent_id = new_sent)

de.gpt.extended.m <- de.gpt.extended %>%
  separate(cond, c('verb.type', 'first.NP'), sep='_')

de.gpt.extended.m$verb.type <- as.factor(paste(de.gpt.extended.m$verb.type))
de.gpt.extended.m$first.NP <- as.factor(paste(de.gpt.extended.m$first.NP))
de.gpt.extended.m$surprisal <- as.numeric(paste(de.gpt.extended.m$surprisal))
de.gpt.extended.m$sent <- as.factor(paste(de.gpt.extended.m$sent_id))

de.gpt.extended.m$first.NP <- relevel(de.gpt.extended.m$first.NP, ref='subject')

contrasts(de.gpt.extended.m$first.NP)
```

```
##          object
## subject      0
## object      1
```

```
contrasts(de.gpt.extended.m$verb.type)
```

```
##      dat
## acc  0
## dat  1
```

Table S1 gives an overview of the number of stimuli per condition for each dataset and model. The number of stimuli is (almost) equal to the number of stimuli from the original experiment apart for the LSTM original dataset.

Table S1: Nr of Sentences per condition and dataset

| Dataset  | Models | Agent_1st_acc | Patient_1st_acc | Agent_1st_dat | Patient_1st_dat | total |
|----------|--------|---------------|-----------------|---------------|-----------------|-------|
| original | LSTM   | 288           | 288             | 224           | 224             | 1024  |
| extended | LSTM   | 1312          | 1312            | 1152          | 1152            | 4928  |
| original | BERT   | 1344          | 1344            | 1344          | 1344            | 5376  |
| extended | BERT   | 1328          | 1328            | 1328          | 1328            | 5312  |
| original | GPT-2  | 336           | 336             | 336           | 336             | 1344  |
| extended | GPT-2  | 332           | 332             | 332           | 332             | 1328  |

### S3.1.1 Hindi

#### Original stimuli, surprisal estimated by LSTM

```
hi.lstm.original <- read.csv('../results/hindi_LSTM_original_prep.csv',
                             sep='\t')

hi.lstm.original.m <- hi.lstm.original %>%
  filter(region %in% 'VERB')

hi.lstm.original.m$ambiguity <- as.factor(paste(hi.lstm.original.m$ambiguity))
hi.lstm.original.m$aspect <- as.factor(paste(hi.lstm.original.m$aspect))
hi.lstm.original.m$surprisal <- as.numeric(paste(hi.lstm.original.m$surprisal))
hi.lstm.original.m$sent_id <- as.factor(paste(hi.lstm.original.m$sent_id))

contrasts(hi.lstm.original.m$ambiguity)
```

```
##          UNAMB
## AMB      0
## UNAMB    1
```

```
contrasts(hi.lstm.original.m$aspect)
```

```
##      PFV
## IPFV  0
## PFV   1
```

### Extended stimuli, surprisal estimated by LSTM

```
hi.lstm.extended <- read.csv('../results/hindi_LSTM_extended_prep.csv',
                             sep='\t')

hi.lstm.extended.m <- hi.lstm.extended %>%
  filter(region %in% 'VERB')

hi.lstm.extended.m$ambiguity <- as.factor(paste(hi.lstm.extended.m$ambiguity))
hi.lstm.extended.m$aspect <- as.factor(paste(hi.lstm.extended.m$aspect))
hi.lstm.extended.m$surprisal <- as.numeric(paste(hi.lstm.extended.m$surprisal))
hi.lstm.extended.m$sent_id <- as.factor(paste(hi.lstm.extended.m$sent_id))

contrasts(hi.lstm.extended.m$ambiguity)
```

```
##      UNAMB
## AMB     0
## UNAMB   1
```

```
contrasts(hi.lstm.extended.m$aspect)
```

```
##      PFV
## IPFV  0
## PFV   1
```

### Original stimuli, surprisal estimated by BERT

```
hi.tr.original <- read.csv('../results/hindi_transformer_original_prep.csv' ,
                             sep='\t')

hi.tr.original.m <- hi.tr.original %>%
  filter(region %in% 'VERB')

hi.tr.original.m$ambiguity <- as.factor(paste(hi.tr.original.m$ambiguity))
hi.tr.original.m$aspect <- as.factor(paste(hi.tr.original.m$aspect))
hi.tr.original.m$surprisal <- as.numeric(paste(hi.tr.original.m$surprisal))
hi.tr.original.m$sent_id <- as.factor(paste(hi.tr.original.m$sent_id))

contrasts(hi.tr.original.m$ambiguity)
```

```
##      UNAMB
## AMB     0
## UNAMB   1
```

```
contrasts(hi.tr.original.m$aspect)
```

```
##      PFV
## IPFV  0
## PFV   1
```

### Extended stimuli, surprisal estimated by BERT

```
hi.tr.extended <- read.csv('../results/hindi_transformer_extended_prep.csv',
                           sep='\t')
```

```
hi.tr.extended.m <- hi.tr.extended %>%
  filter(region %in% 'VERB')
```

```
hi.tr.extended.m$ambiguity <- as.factor(paste(hi.tr.extended.m$ambiguity))
hi.tr.extended.m$aspect <- as.factor(paste(hi.tr.extended.m$aspect))
hi.tr.extended.m$surprisal <- as.numeric(paste(hi.tr.extended.m$surprisal))
hi.tr.extended.m$sent_id <- as.factor(paste(hi.tr.extended.m$sent_id))
```

```
contrasts(hi.tr.extended.m$ambiguity)
```

```
##      UNAMB
## AMB      0
## UNAMB    1
```

```
contrasts(hi.tr.extended.m$aspect)
```

```
##      PFV
## IPFV  0
## PFV   1
```

### Original stimuli, surprisal estimated by GPT-2

```
hi.gpt.original <- read.csv('../results/hindi_gpt_original_prep.csv' ,
                             sep='\t') %>%
  mutate('ambiguity' = ifelse(grepl('A', cond), 'AMB', 'UNAMB')) %>%
  mutate('aspect' = ifelse(grepl('I', cond), 'IPFV', 'PFV'))
```

```
hi.gpt.original.m <- hi.gpt.original
```

```
hi.gpt.original.m$ambiguity <- as.factor(paste(hi.gpt.original.m$ambiguity))
hi.gpt.original.m$aspect <- as.factor(paste(hi.gpt.original.m$aspect))
hi.gpt.original.m$surprisal <- as.numeric(paste(hi.gpt.original.m$surprisal))
hi.gpt.original.m$sent_id <- as.factor(paste(hi.gpt.original.m$sent_id))
```

### Extended stimuli, surprisal estimated by GPT-2



```

hi.gpt.extended <- read.csv('../results/hindi_gpt_extended_prep.csv' ,
                             sep='\t') %>%
  mutate('ambiguity' = ifelse(grepl('A', cond), 'AMB', 'UNAMB')) %>%
  mutate('aspect' = ifelse(grepl('I', cond), 'IPFV', 'PFV'))

hi.gpt.extended.m <- hi.gpt.extended

hi.gpt.extended.m$ambiguity <- as.factor(paste(hi.gpt.extended.m$ambiguity))
hi.gpt.extended.m$aspect <- as.factor(paste(hi.gpt.extended.m$aspect))
hi.gpt.extended.m$surprisal <- as.numeric(paste(hi.gpt.extended.m$surprisal))
hi.gpt.extended.m$sent_id <- as.factor(paste(hi.gpt.extended.m$sent_id))

```

Table S2 gives an overview of the number of stimuli per condition for each dataset and model.

Table S2: Nr of Sentences per condition and dataset

| Dataset  | Models | Amb_IPFV | Unamb_IPFV | Amb_PFV | Unamb_IPFV.1 | total |
|----------|--------|----------|------------|---------|--------------|-------|
| original | LSTM   | 23       | 23         | 29      | 41           | 75    |
| extended | LSTM   | 47       | 45         | 48      | 52           | 140   |
| original | BERT   | 60       | 60         | 60      | 60           | 180   |
| extended | BERT   | 60       | 60         | 60      | 60           | 180   |
| original | GPT-2  | 60       | 60         | 60      | 60           | 180   |
| extended | GPT-2  | 60       | 60         | 60      | 60           | 180   |

### S3.1.2 Basque

#### Original stimuli, surprisal estimated by LSTM

```
eu.lstm.original <- read.csv('../results/basque_LSTM_original_prep.csv',
                             sep='\t') %>%
  separate(sent_id, c('sent_id', 'cond_id'), sep='_')

eu.lstm.original.m <- eu.lstm.original %>%
  filter(region %in% 'Verb') %>% # filter surprisal value at critical region
  separate(cond, c('Ambiguity', 'Semantic.Role'), remove=F, sep='_')
```

#### Extended stimuli, surprisal estimated by LSTM

```
eu.lstm.extended <- read.csv('../results/basque_LSTM_extended_prep.csv',
                              sep='\t') %>%
  separate(sent_id, c('sent_id', 'cond_id'), sep='_')
#mutate(sent_id = str_replace(sent_id, '_', ':'))

eu.lstm.extended.m <- eu.lstm.extended %>%
  filter(region %in% 'Verb') %>% # filter surprisal value at critical region
  separate(cond, c('Ambiguity', 'Semantic.Role'), remove=F, sep='_')
```

#### Original stimuli, surprisal estimated by RoBERTa

```
eu.tr.original <- read.csv('../results/basque_transformer_original_prep.csv',
                             sep='\t') %>% # mutate(sent_id = str_replace(sent_id, '_', ':')) %>%
  rename(cond = condition) %>%
  separate(sent_id, c('sent_id', 'cond_id'), sep='_')

eu.tr.original.m <- eu.tr.original %>%
  filter(region_nr == 5) %>% # filter surprisal value at critical region
  separate(cond, c('Ambiguity', 'Semantic.Role'), remove=F, sep='_')
```

#### Extended stimuli, surprisal estimated by RoBERTa

```
eu.tr.extended <- read.csv('../results/basque_transformer_extended_prep.csv',
                              sep='\t') %>%
  separate(sent_id, c('sent_id', 'cond_id'), sep='_') %>%
  rename(cond = condition)
# mutate(sent_id = str_replace(sent_id, '_', ':'))

eu.tr.extended.m <- eu.tr.extended %>%
  filter(region_nr == 5) %>% # filter surprisal value at critical region
  separate(cond, c('Ambiguity', 'Semantic.Role'), remove=F, sep='_')
```

#### Original stimuli, surprisal estimated by GPT-2

```

eu.gpt.original <- read.csv('../results/basque_GPT_original_prep.csv', sep='\t') %>%
  separate(cond, c('Ambiguity', 'Semantic.Role'), sep='_') %>%
  separate(sent_id, c('sent_id', 'cond_it'), sep='_')

eu.gpt.original.m <- eu.gpt.original
eu.gpt.original.m$surprisal <- as.numeric(paste(eu.gpt.original.m$surprisal))
eu.gpt.original.m$Semantic.Role <- as.factor(paste(eu.gpt.original.m$Semantic.Role))
eu.gpt.original.m$Ambiguity <- as.factor(paste(eu.gpt.original.m$Ambiguity))
eu.gpt.original.m$sent_id <- as.factor(paste(eu.gpt.original.m$sent_id))

```

### Extended stimuli, surprisal estimated by GPT

```

eu.gpt.extended <- read.csv('../results/basque_GPT_extended_prep.csv', sep='\t') %>%
  separate(cond, c('Ambiguity', 'Semantic.Role'), sep='_') %>%
  separate(sent_id, c('sent_id', 'cond_it'), sep='_')

eu.gpt.extended.m <- eu.gpt.extended
eu.gpt.extended.m$surprisal <- as.numeric(paste(eu.gpt.extended.m$surprisal))
eu.gpt.extended.m$Semantic.Role <- as.factor(paste(eu.gpt.extended.m$Semantic.Role))
eu.gpt.extended.m$Ambiguity <- as.factor(paste(eu.gpt.extended.m$Ambiguity))
eu.gpt.extended.m$sent_id <- as.factor(paste(eu.gpt.extended.m$sent_id))

```

Table S3 gives an overview of the number of stimuli per condition for each dataset and model. The number of stimuli is (almost) equal to the number of stimuli from the original experiment apart for the LSTM original dataset. A small deviation of LSTM extended in number from transformer dataset sizes exists because replacement words were accidentally selected that were not in the model vocabulary.

Table S3: Nr of Sentences per condition and dataset

| Dataset  | Models  | Amb_Patient | Amb_Agent | Unamb_Patient | Unamb_Agent | total |
|----------|---------|-------------|-----------|---------------|-------------|-------|
| original | LSTM    | 86          | 72        | 85            | 72          | 315   |
| extended | LSTM    | 190         | 190       | 190           | 189         | 759   |
| original | RoBERTa | 192         | 192       | 192           | 192         | 768   |
| extended | RoBERTa | 192         | 192       | 192           | 192         | 768   |
| original | GPT-2   | 192         | 192       | 192           | 192         | 768   |
| extended | GPT-2   | 192         | 192       | 192           | 192         | 768   |

## S3.2 Models: Estimates of Surprisal

For each model and dataset, we fit a model to estimate surprisal. We use Bayesian hierarchical models to include the effect of conditions (semantic role of subject and ambiguity) and random intercepts and slopes for item ID. We check convergence by ensuring that Effective Sample Size  $ESS > 100$  and diagnostic  $\hat{R} < 1.05$ . Additionally, we perform prior and posterior predictive checks to 1) compare whether the posterior distribution moved away from the prior distribution and 2) compare the predicted values to the observed data.

We perform leave-one-out with Pareto smoothed importance sampling using the `loo` package [Vehari2017practical]. We further fit a baseline model to examine whether the conditions improve the model fit.

Lastly, in response to a reviewer's request, we replicate the results with a paired t-test for the original stimuli only. ### German

### Original stimuli, surprisal estimated by LSTM

```
prior.de.lstm.original <- c(
  prior(normal(0,1), class = b),
  prior(exponential(1), class = sigma),
  prior(exponential(1), class = sd)
)

prior.de.lstm.original.null <- c(
  prior(exponential(1), class = sigma)
)

contrasts(de.lstm.original.m$first.NP)

##          object
## subject      0
## object       1

contrasts(de.lstm.original.m$verb.type)

##      dat
## acc  0
## dat  1

model.de.lstm.original <-
  brm(surprisal ~ verb.type * first.NP + (1+verb.type+first.NP|sent_id),
      family = gaussian,
      save_pars = save_pars(all = T),
      sample_prior = T,
      data = de.lstm.original.m,
      prior = prior.de.lstm.original,
      file = '../models/de.lstm.original',
      chains = 4, iter = 4000, warmup=1000, cores = 4,
      control = list(adapt_delta = 0.96, max_treedepth=15)
  )

model.de.lstm.original.prior <-
  brm(surprisal ~ verb.type * first.NP + (1+verb.type+first.NP|sent_id),
```

```

family = gaussian,
sample_prior = T,
data = de.lstm.original.m,
file = '../models/de.lstm.original.prior',
prior = prior.de.lstm.original
)

model.de.lstm.original.null <-
  brm(surprisal ~ 1 + (1|sent_id),
      family = gaussian,
      save_pars = save_pars(all = T),
      sample_prior = T,
      data = de.lstm.original.m,
      prior = prior.de.lstm.original.null ,
      file = '../models/de.lstm.original_null',
      chains = 4, iter = 4000, warmup=1000, cores = 4
  )

pp_check(model.de.lstm.original.prior, nsamples=1e2)

```

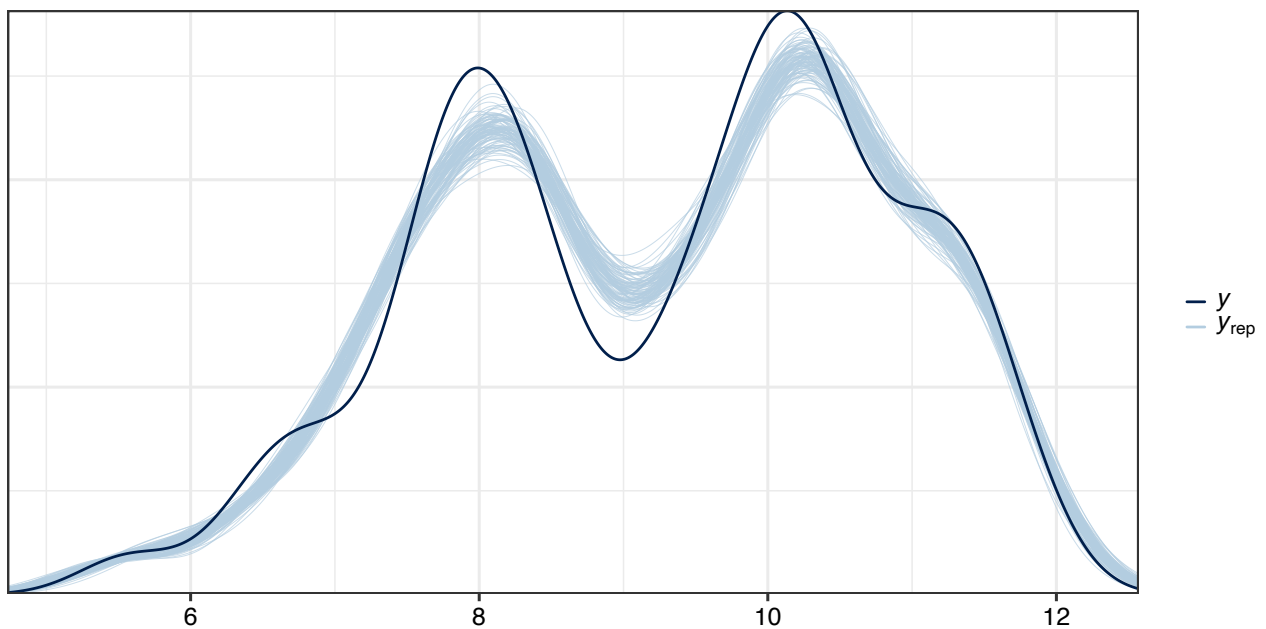

```
pp_check(model.de.lstm.original, nsamples=1e2)
```

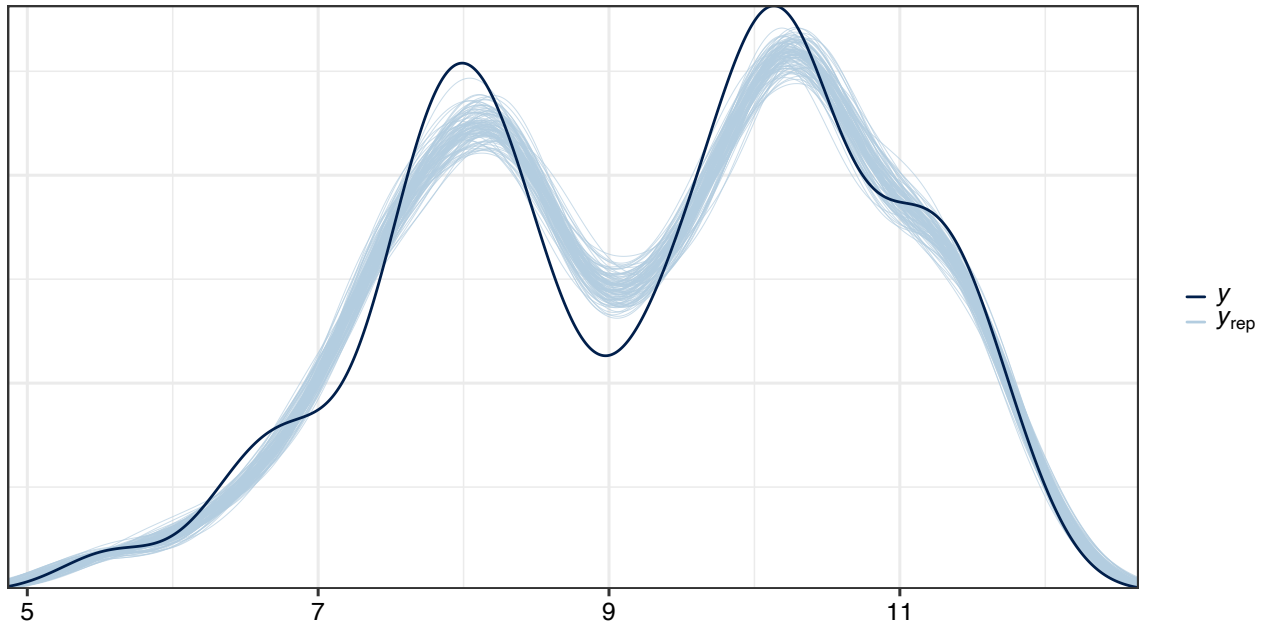

```
loo.m.de.lstm.orig <- loo(model.de.lstm.original)
loo.m.de.lstm.orig.null <- loo(model.de.lstm.original.null)

loo_model_weights(list("hypothesis" = loo.m.de.lstm.orig ,
                      "null" = loo.m.de.lstm.orig.null))
```

```
## Method: stacking
## -----
##           weight
## hypothesis 1.000
## null       0.000
```

```
loo_compare(list("hypothesis" = loo.m.de.lstm.orig,
                "null" = loo.m.de.lstm.orig.null))
```

```
##           elpd_diff se_diff
## hypothesis      0.0      0.0
## null          -1827.9     24.9
```

### Extended stimuli, surprisal estimated by LSTM

```
contrasts(de.lstm.extended.m$first.NP)
```

```
##           object
## subject      0
## object       1
```

```
contrasts(de.lstm.extended.m$verb.type)
```

```
##           dat
## acc      0
## dat      1
```

```

model.de.lstm.extended <-
  brm(surprisal ~ verb.type * first.NP + (1+verb.type+first.NP|sent_id),
      family = gaussian,
      save_pars = save_pars(all = T),
      sample_prior = T,
      data = de.lstm.extended.m,
      prior = prior.de.lstm.original,
      file = '../models/de.lstm.extended',
      chains = 4, iter = 4000, warmup=1000, cores = 4
  )

model.de.lstm.extended.prior <-
  brm(surprisal ~ verb.type * first.NP + (1+verb.type+first.NP|sent_id),
      family = gaussian,
      sample_prior = 'only',
      file = '../models/de.lstm.extended.prior',
      data = de.lstm.extended.m,
      prior = prior.de.lstm.original
  )

model.de.lstm.extended.null <-
  brm(surprisal ~ 1 + (1|sent_id),
      family = student(),
      save_pars = save_pars(all = T),
      sample_prior = T,
      data = de.lstm.extended.m,
      prior = prior.de.lstm.original.null,
      file = '../models/de.lstm.extended_null',
      chains = 4, iter = 4000, warmup=1000, cores = 4
  )

pp_check(model.de.lstm.extended.prior, nsamples=1e2)

```

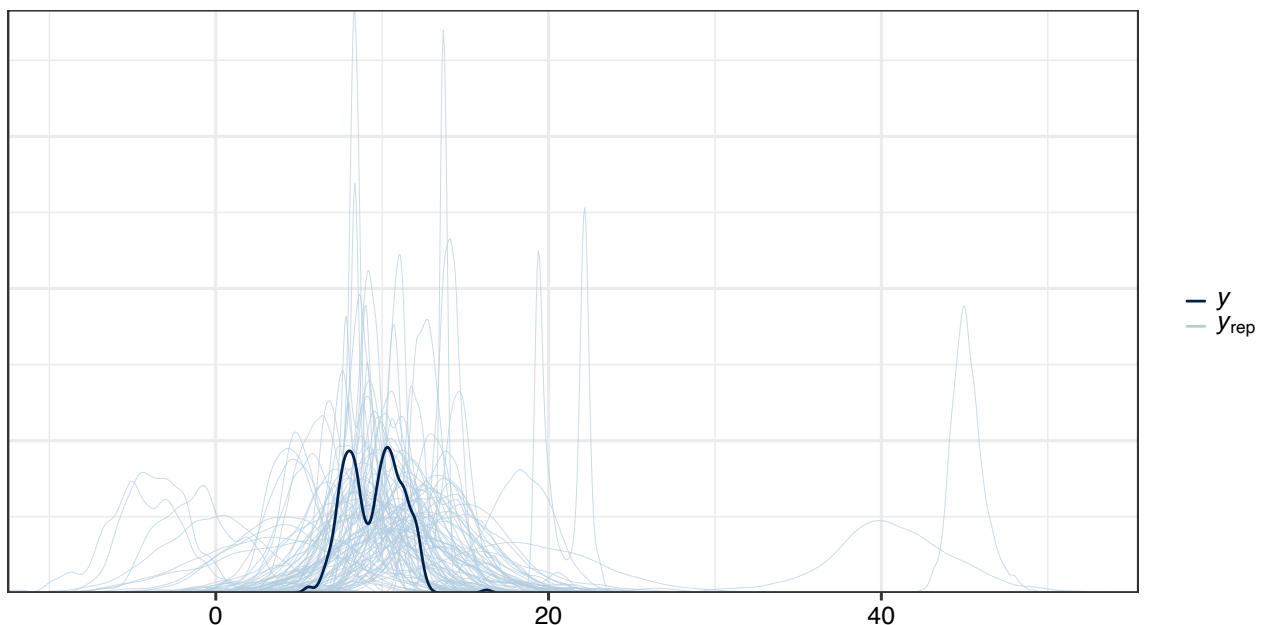

```
pp_check(model.de.lstm.extended, nsamples=1e2)
```

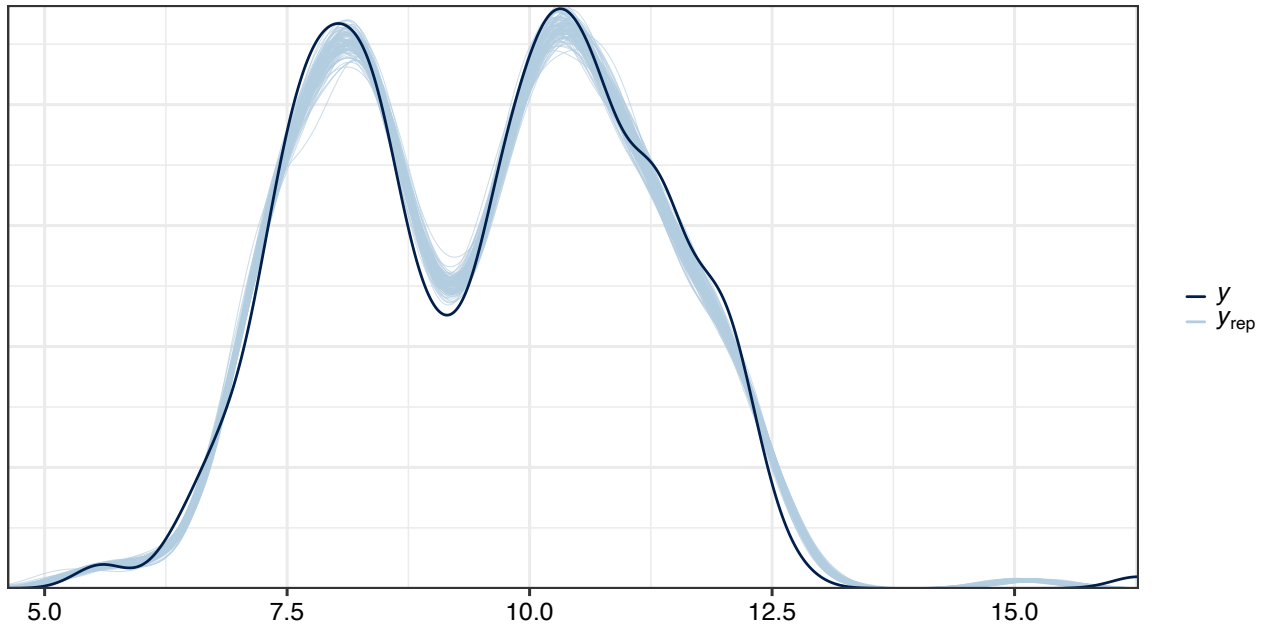

```
loo.m.de.lstm.extended <- loo(model.de.lstm.extended)
loo.m.de.lstm.extended.null <- loo(model.de.lstm.extended.null)
```

```
loo_model_weights(list("hypothesis" = loo.m.de.lstm.extended ,
                       "null" = loo.m.de.lstm.extended.null))
```

```
## Method: stacking
## -----
##           weight
## hypothesis 0.983
## null       0.017
```

```
loo_compare(list("hypothesis" = loo.m.de.lstm.extended,
                 "null" = loo.m.de.lstm.extended.null))
```

```
##           elpd_diff se_diff
## hypothesis    0.0      0.0
## null        -8502.1    85.7
```

Original stimuli, surprisal estimated by transformer

```
contrasts(de.tr.original.m$first.NP)
```

```
##           object
## subject    0
## object     1
```



```
contrasts(de.tr.original.m$verb.type)
```

```
##      dat
## acc   0
## dat   1
```

```
model.de.tr.original <-
  brm(surprisal ~ verb.type * first.NP + (1+first.NP+verb.type|sent_id),
      family = gaussian,
      save_pars = save_pars(all = T),
      sample_prior = T,
      data = de.tr.original.m,
      file = '../models/de.tr.original',
      prior = prior.de.lstm.original,
      chains = 4, iter = 8000, warmup=1000, cores = 4,
      control = list(adapt_delta = 0.96, max_treedepth=15)
  )
```

```
model.de.tr.original.prior <-
  brm(surprisal ~ verb.type * first.NP + (1+first.NP+verb.type|sent_id),
      family = gaussian,
      sample_prior = 'only',
      data = de.tr.original.m,
      file = '../models/de.tr.original.prior',
      prior = prior.de.lstm.original
  )
```

```
model.de.tr.original.null <-
  brm(surprisal ~ 1+ (1|sent_id),
      family = gaussian,
      save_pars = save_pars(all = T),
      sample_prior = T,
      data = de.tr.original.m,
      prior = prior.de.lstm.original.null,
      file = '../models/de.tr.original_null',
      chains = 4, iter = 8000, warmup=1000, cores = 4,
      control = list(adapt_delta = 0.96, max_treedepth=15)
  )
```

```
pp_check(model.de.tr.original.prior, nsamples=1e2)
```

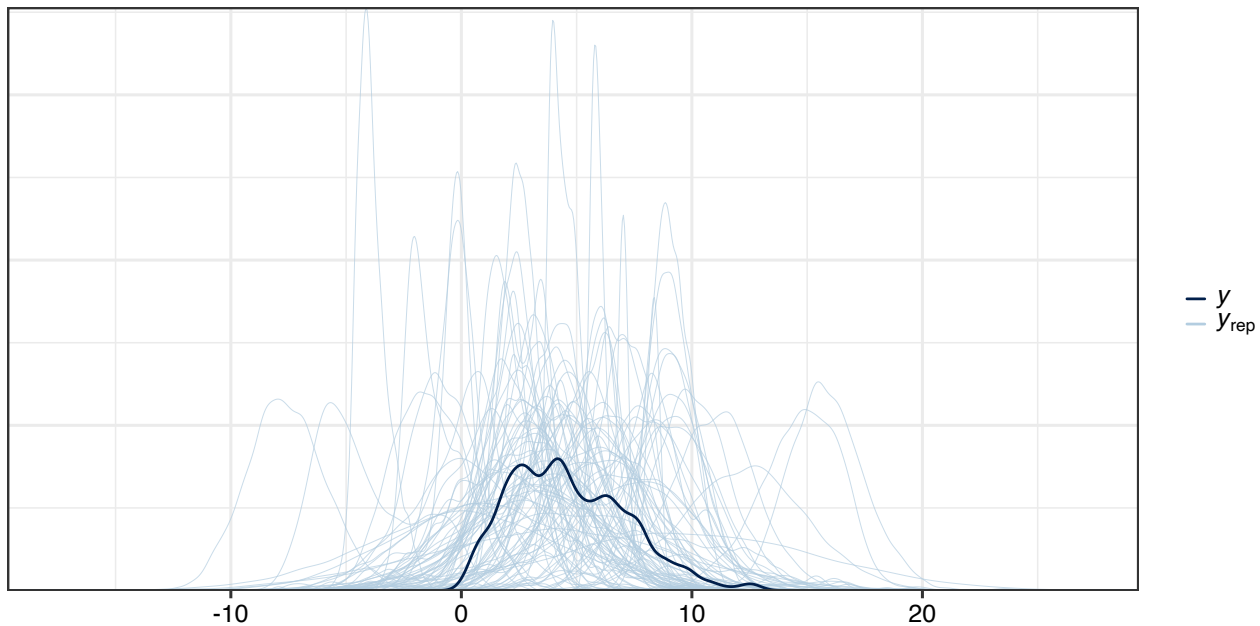

```
pp_check(model.de.tr.original, nsamples=1e2)
```

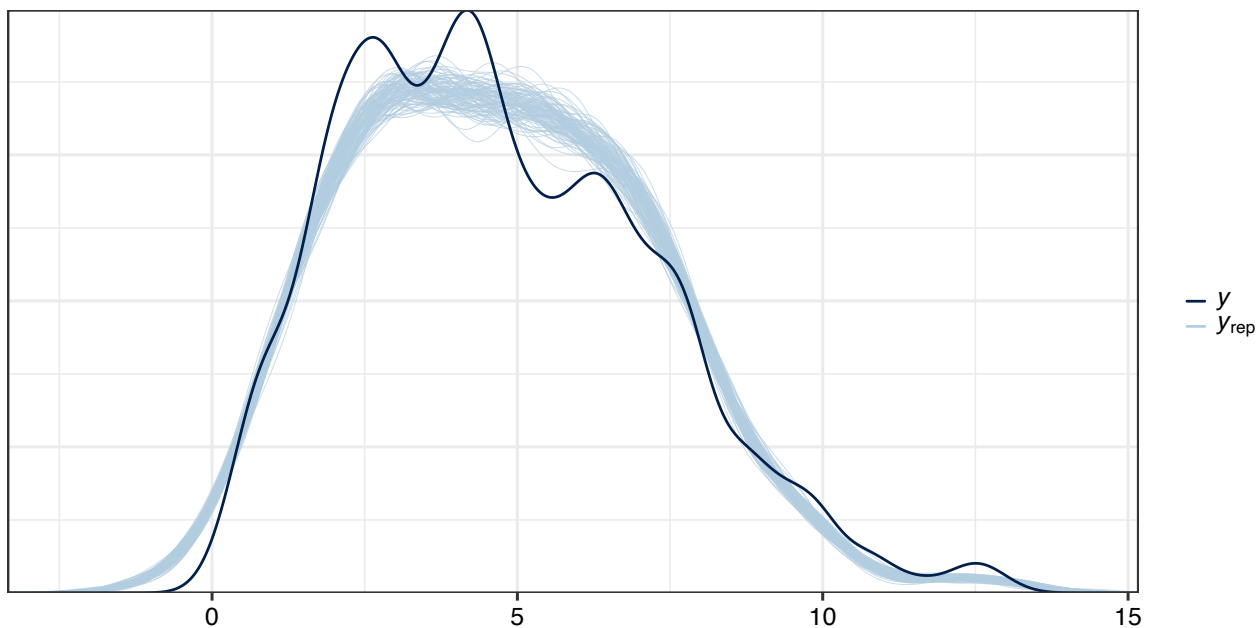

```
loo.m.de.tr.orig <- loo(model.de.tr.original)
loo.m.de.tr.orig.null <- loo(model.de.tr.original.null)

loo_model_weights(list("hypothesis" = loo.m.de.tr.orig ,
                      "null" = loo.m.de.tr.orig.null))
```

```
## Method: stacking
## -----
##           weight
## hypothesis 0.983
## null      0.017
```

```
loo_compare(list("hypothesis" = loo.m.de.tr.orig,  
               "null" = loo.m.de.tr.orig.null))
```

```
##           elpd_diff se_diff  
## hypothesis    0.0    0.0  
## null        -5978.0    79.3
```

Extended stimuli, surprisal estimated by transformer

```
contrasts(de.tr.extended.m$first.NP)
```

```
##           object  
## subject      0  
## object       1
```

```
contrasts(de.tr.extended.m$verb.type)
```

```
##      dat  
## acc  0  
## dat  1
```

```
model.de.tr.extended <-  
  brm(surprisal ~ verb.type * first.NP + (1+first.NP+verb.type|sent_id),  
      family = gaussian,  
      save_pars = save_pars(all = T),  
      sample_prior = T,  
      data = de.tr.extended.m,  
      file = '../models/de.tr.extended',  
      prior = prior.de.lstm.original,  
      chains = 4, iter = 8000, warmup=1000, cores = 4,  
      control = list(adapt_delta = 0.96, max_treedepth=15)  
  )
```

```
model.de.tr.extended.prior <-  
  brm(surprisal ~ verb.type * first.NP + (1+first.NP+verb.type|sent_id),  
      family = gaussian,  
      sample_prior = 'only',  
      file = '../models/de.tr.extended.prior',  
      data = de.tr.extended.m,  
      prior = prior.de.lstm.original  
  )
```

```
model.de.tr.extended.null <-  
  brm(surprisal ~ 1+ (1|sent_id),  
      family = gaussian,  
      save_pars = save_pars(all = T),  
      sample_prior = T,  
      data = de.tr.extended.m,  
      prior = prior.de.lstm.original.null,  
      file = '../models/de.tr.extended_null',  
      chains = 4, iter = 8000, warmup=1000, cores = 4,
```

```
control = list(adapt_delta = 0.96, max_treedepth=15)  
)
```

```
pp_check(model.de.tr.extended.prior, nsamples=1e2)
```

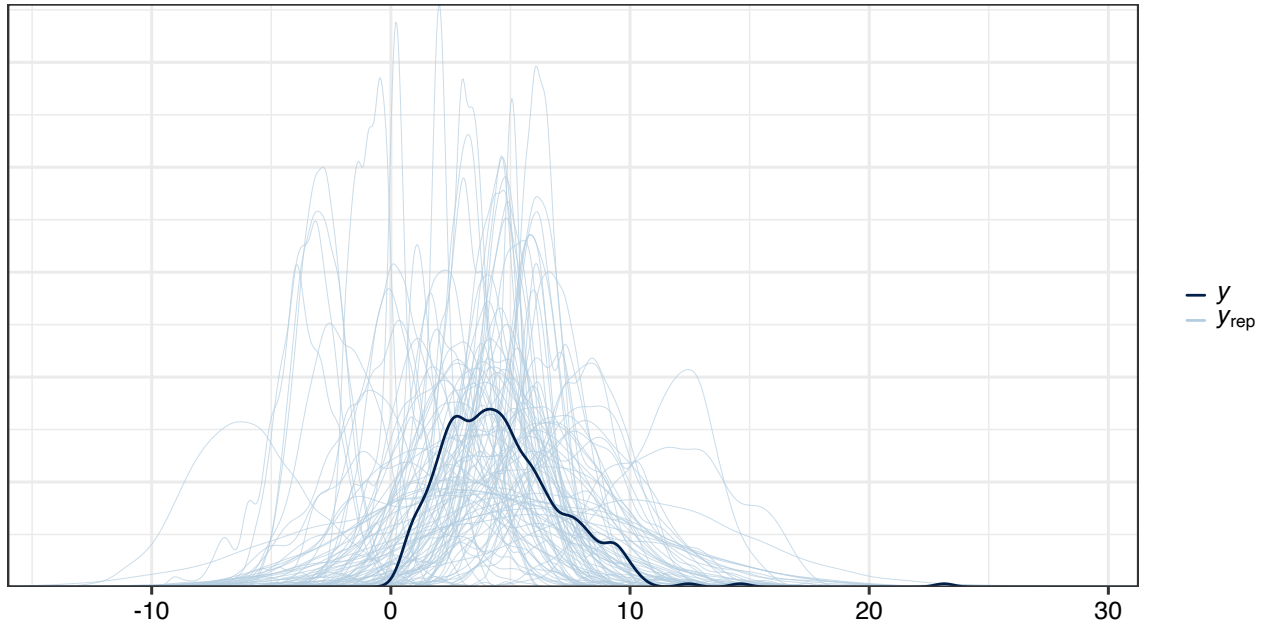

```
pp_check(model.de.tr.extended, nsamples=1e2)
```

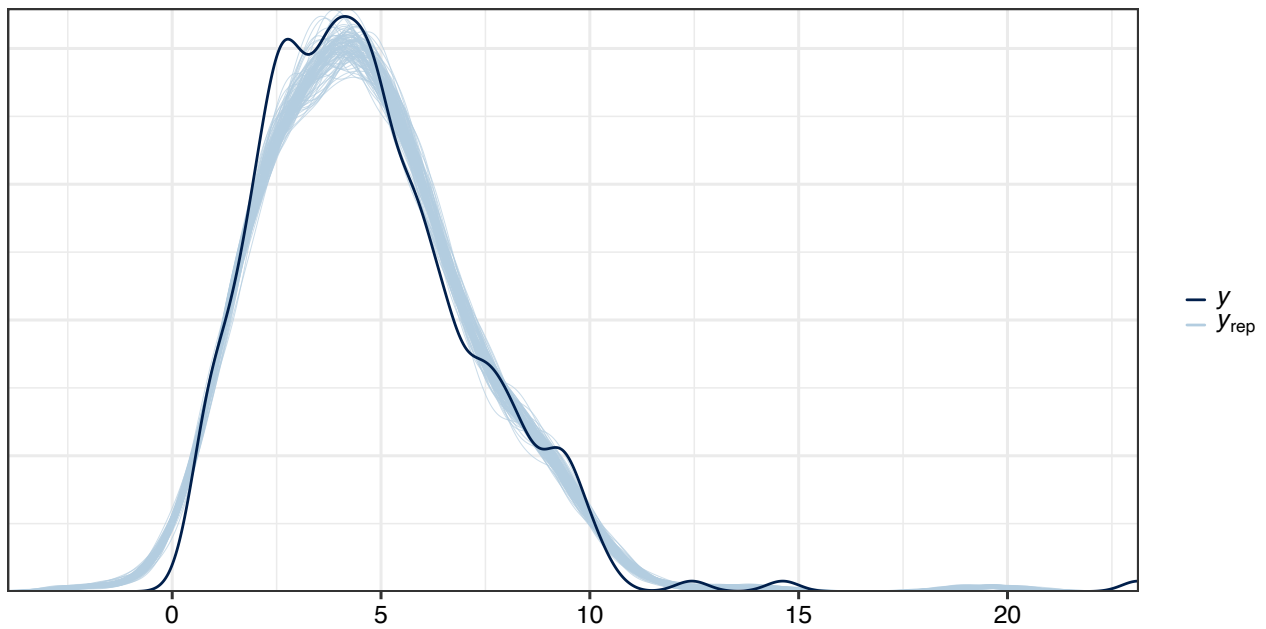

```
loo.m.de.tr.ext <- loo(model.de.tr.extended)  
loo.m.de.tr.ext.null <- loo(model.de.tr.extended.null)
```

```
loo_model_weights(list("hypothesis" = loo.m.de.tr.ext ,
                      "null" = loo.m.de.tr.ext.null))
```

```
## Method: stacking
## -----
##           weight
## hypothesis 0.986
## null       0.014
```

```
loo_compare(list("hypothesis" = loo.m.de.tr.ext,
                "null" = loo.m.de.tr.ext.null))
```

```
##           elpd_diff se_diff
## hypothesis     0.0     0.0
## null          -5741.3    88.8
```

Original stimuli, surprisal estimated by GPT-2

```
contrasts(de.gpt.original.m$first.NP)
```

```
##           object
## subject     0
## object      1
```

```
contrasts(de.gpt.original.m$verb.type)
```

```
##           dat
## acc      0
## dat      1
```

```
model.de.gpt.original <-
  brm(surprisal ~ verb.type * first.NP + (1+first.NP+verb.type|sent),
      family = gaussian,
      save_pars = save_pars(all = T),
      sample_prior = T,
      data = de.gpt.original.m,
      file = '../models/de.gpt.original',
      prior = prior.de.lstm.original,
      chains = 4, iter = 8000, warmup=1000, cores = 4,
      control = list(adapt_delta = 0.96, max_treedepth=15)
  )
```

```
model.de.gpt.original.prior <-
  brm(surprisal ~ verb.type * first.NP + (1+first.NP+verb.type|sent),
      family = gaussian,
      sample_prior = 'only',
      data = de.gpt.original.m,
      file = '../models/de.gpt.original.prior',
      prior = prior.de.lstm.original
  )
```

```

model.de.gpt.original.null <-
  brm(surprisal ~ 1+ (1|sent_id),
      family = gaussian,
      save_pars = save_pars(all = T),
      sample_prior = T,
      data = de.gpt.original.m,
      prior = prior.de.lstm.original.null,
      file = '../models/de.gpt.original_null',
      chains = 4, iter = 8000, warmup=1000, cores = 4,
      control = list(adapt_delta = 0.96, max_treedepth=15)
  )

```

```
pp_check(model.de.gpt.original.prior, nsamples=1e2)
```

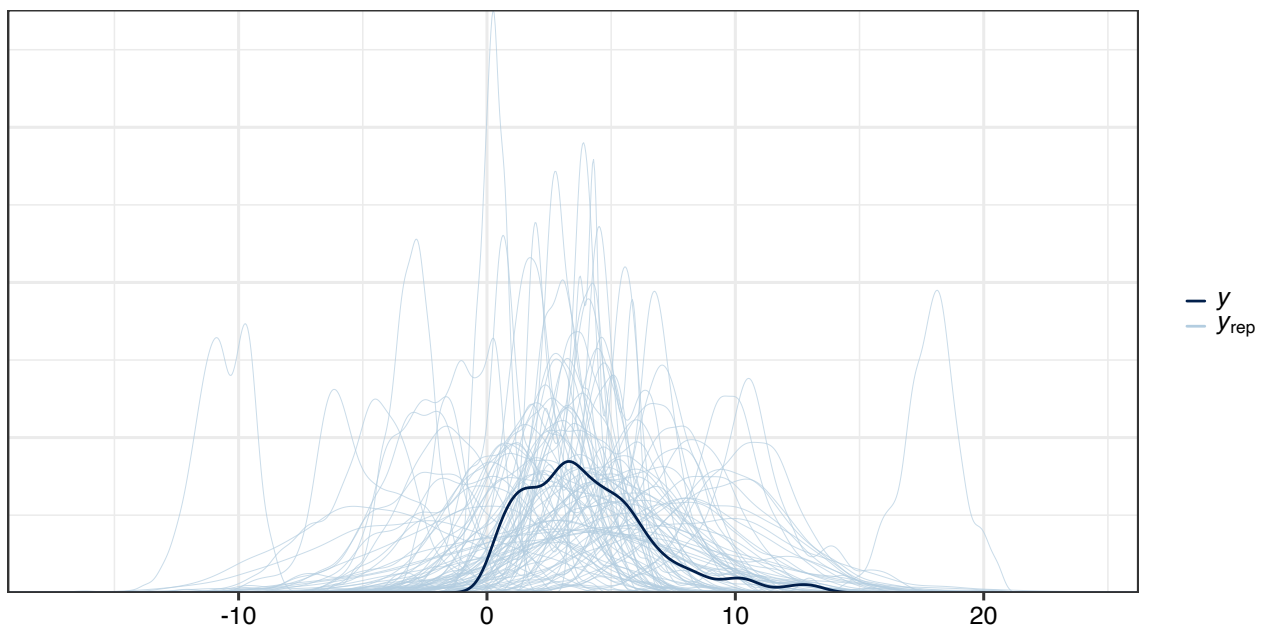

```
pp_check(model.de.gpt.original, nsamples=1e2)
```

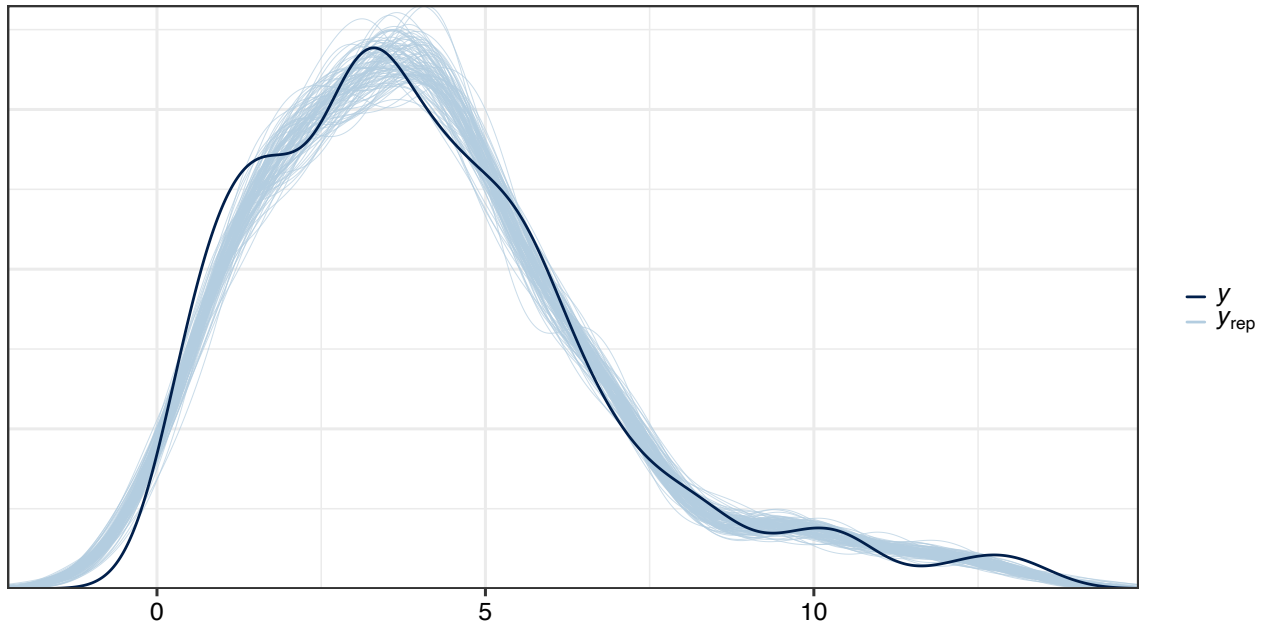

```
loo.m.de.gpt.orig <- loo(model.de.gpt.original)
loo.m.de.gpt.orig.null <- loo(model.de.gpt.original.null)

loo_model_weights(list("hypothesis" = loo.m.de.gpt.orig ,
                      "null" = loo.m.de.gpt.orig.null))
```

```
## Method: stacking
## -----
##           weight
## hypothesis 1.000
## null       0.000
```

```
loo_compare(list("hypothesis" = loo.m.de.gpt.orig,
                "null" = loo.m.de.gpt.orig.null))
```

```
##           elpd_diff se_diff
## hypothesis    0.0      0.0
## null       -1513.4    34.7
```

Extended stimuli, surprisal estimated by GPT-2

```
contrasts(de.gpt.extended.m$first.NP)
```

```
##           object
## subject     0
## object      1
```

```
contrasts(de.gpt.extended.m$verb.type)
```

```
##           dat
## acc      0
## dat      1
```

```

model.de.gpt.extended <-
  brm(surprisal ~ verb.type * first.NP + (1+first.NP+verb.type|sent_id),
      family = gaussian,
      save_pars = save_pars(all = T),
      sample_prior = T,
      data = de.gpt.extended.m,
      file = '../models/de.gpt.extended',
      prior = prior.de.lstm.original,
      chains = 4, iter = 8000, warmup=1000, cores = 4,
      control = list(adapt_delta = 0.96, max_treedepth=15)
  )

model.de.gpt.extended.prior <-
  brm(surprisal ~ verb.type * first.NP + (1+first.NP+verb.type|sent_id),
      family = gaussian,
      sample_prior = 'only',
      file = '../models/de.gpt.extended.prior',
      data = de.gpt.extended.m,
      prior = prior.de.lstm.original
  )

model.de.gpt.extended.null <-
  brm(surprisal ~ 1+ (1|sent_id),
      family = gaussian,
      save_pars = save_pars(all = T),
      sample_prior = T,
      data = de.gpt.extended.m,
      prior = prior.de.lstm.original.null,
      file = '../models/de.gpt.extended_null',
      chains = 4, iter = 8000, warmup=1000, cores = 4,
      control = list(adapt_delta = 0.96, max_treedepth=15)
  )

pp_check(model.de.gpt.extended.prior, nsamples=1e2)

```



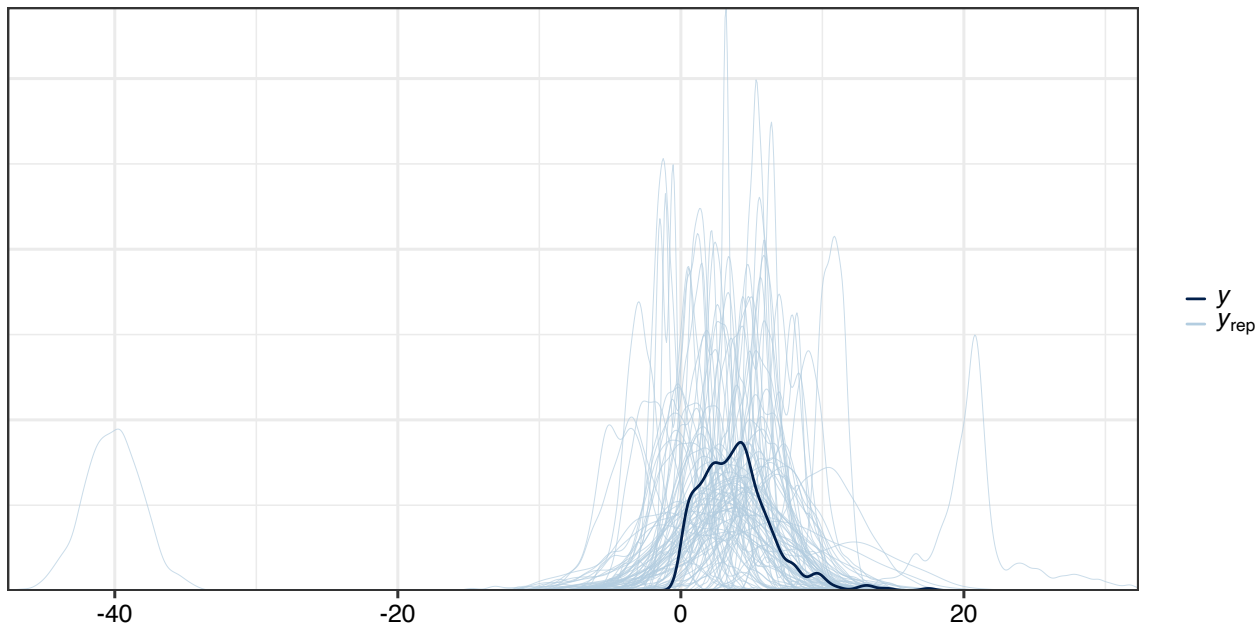

```
pp_check(model.de.gpt.extended, nsamples=1e2)
```

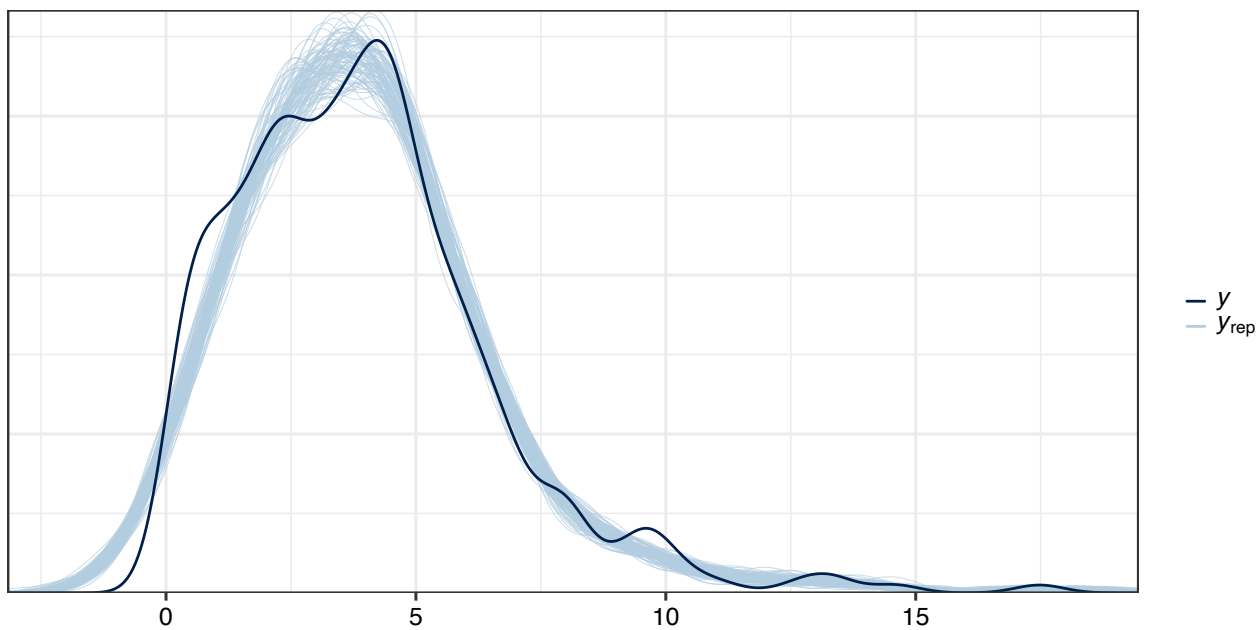

```
loo.m.de.gpt.ext <- loo(model.de.gpt.extended)
loo.m.de.gpt.ext.null <- loo(model.de.gpt.extended.null)

loo_model_weights(list("hypothesis" = loo.m.de.gpt.ext ,
                      "null" = loo.m.de.gpt.ext.null))
```

```
## Method: stacking
## -----
##           weight
## hypothesis 1.000
## null       0.000
```

```
loo_compare(list("hypothesis" = loo.m.de.gpt.ext,  
               "null" = loo.m.de.gpt.ext.null))
```

```
##           elpd_diff se_diff  
## hypothesis      0.0      0.0  
## null          -1464.9     38.0
```

### S3.2.1 Hindi

#### Original stimuli, surprisal estimated by LSTM

```
prior.hi <- c(
  prior(normal(0,1), class = b),
  prior(exponential(1), class = sigma),
  prior(exponential(1), class = sd))

prior.hi.null <- c(
  prior(exponential(1), class = sigma)
)

model.hi.lstm.original <-
  brm(surprisal ~ ambiguity * aspect + (1+ambiguity+aspect|sent_id),
      family = gaussian,
      save_pars = save_pars(all = T),
      sample_prior = T,
      data = hi.lstm.original.m,
      prior = prior.hi.gpt,
      file = '../models/hi.lstm.original',
      chains = 4, iter = 4000, warmup=1000, cores = 4,
      control = list(adapt_delta = 0.96, max_treedepth=15)
  )

model.hi.lstm.original.prior <-
  brm(surprisal ~ ambiguity * aspect + (1+ambiguity+aspect|sent_id),
      family = gaussian,
      sample_prior = 'only',
      file = '../models/hi_lstm_original_prior',
      data = hi.lstm.original.m,
      prior = prior.hi
  )

model.hi.lstm.original.null <-
  brm(surprisal ~ 1 + (1|sent_id),
      family = gaussian,
      save_pars = save_pars(all = T),
      sample_prior = T,
      data = hi.lstm.original.m,
      prior = prior.hi.null,
      file = '../models/hi.lstm.original_null',
      chains = 4, iter = 4000, warmup=1000, cores = 4,
      control = list(adapt_delta = 0.99, max_treedepth=15)
  )

pp_check(model.hi.lstm.original.prior, nsamples=1e2)
```

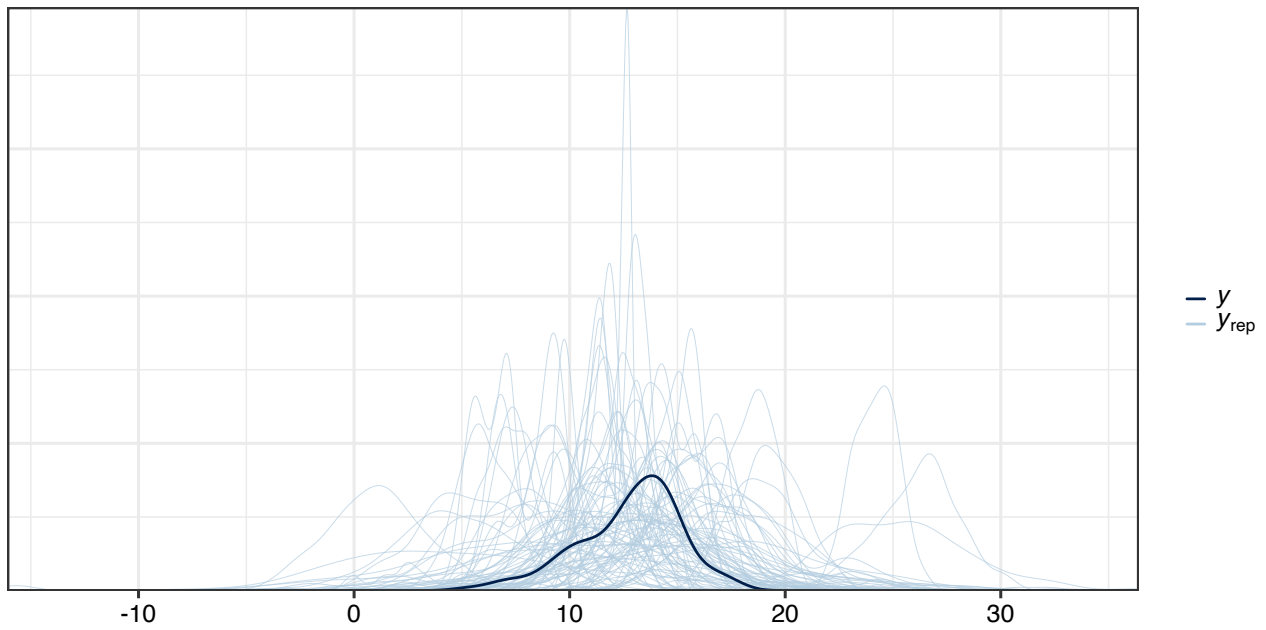

```
pp_check(model.hi.lstm.original, nsamples=1e2)
```

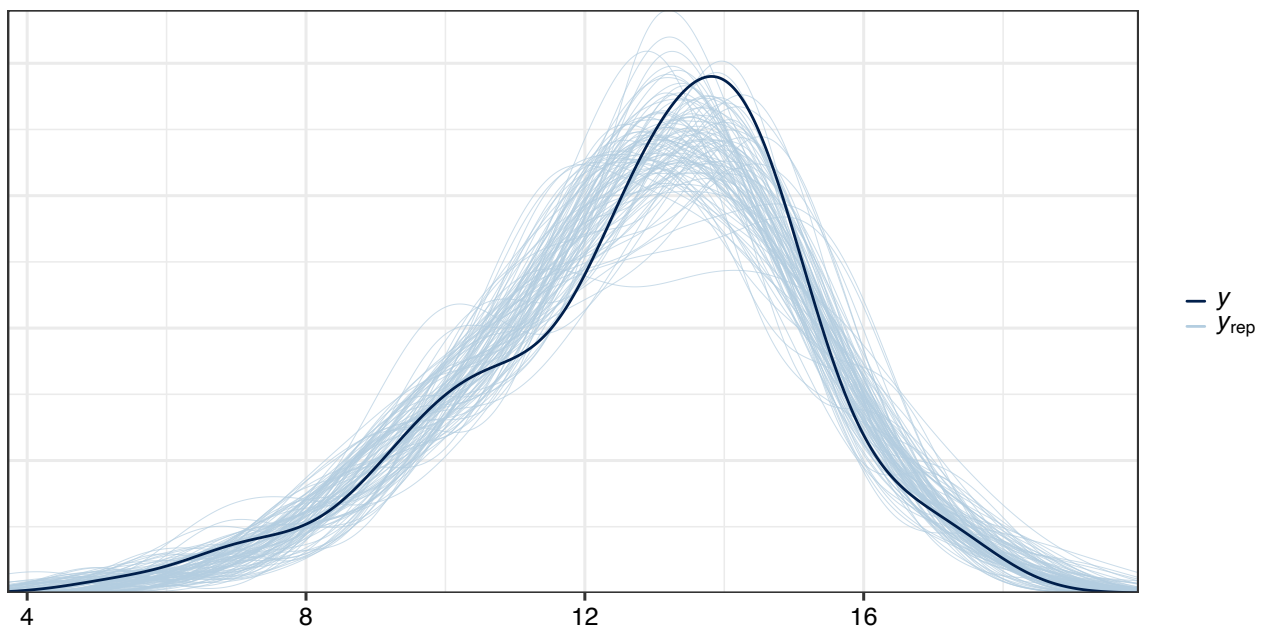

```
loo.m.hi.lstm.orig <- loo(model.hi.lstm.original)
loo.m.hi.lstm.orig.null <- loo(model.hi.lstm.original.null)
```

```
loo_model_weights(list("hypothesis" = loo.m.hi.lstm.orig ,
                      "null" = loo.m.hi.lstm.orig.null))
```

```
## Method: stacking
## -----
##           weight
## hypothesis 0.989
## null       0.011
```

```
loo_compare(list("hypothesis" = loo.m.hi.lstm.orig,
                "null" = loo.m.hi.lstm.orig.null))
```

```
##           elpd_diff se_diff
## hypothesis    0.0      0.0
## null         -55.9      8.2
```

### Extended stimuli, surprisal estimated by LSTM

```
model.hi.lstm.extended <-
  brm(surprisal ~ ambiguity * aspect + (1|sent_id),
      family = gaussian,
      save_pars = save_pars(all = T),
      sample_prior = T,
      data = hi.lstm.extended.m,
      prior = prior.hi,
      file = '../models/hi_lstm_extended',
      chains = 4, iter = 4000, warmup=1000, cores = 4,
      control = list(adapt_delta = 0.99, max_treedepth=15)
  )

model.hi.lstm.extended.prior <-
  brm(surprisal ~ ambiguity * aspect + (1|sent_id),
      family = gaussian,
      sample_prior = 'only',
      file = '../models/hi_lstm_extended_prior',
      data = hi.lstm.extended.m,
      prior = prior.hi
  )

model.hi.lstm.extended.null <-
  brm(surprisal ~ 1 + (1|sent_id),
      family = gaussian,
      save_pars = save_pars(all = T),
      sample_prior = T,
      data = hi.lstm.extended.m,
      prior = prior.hi.null,
      file = '../models/hi_lstm_extended_null',
      chains = 4, iter = 4000, warmup=1000, cores = 4,
      control = list(adapt_delta = 0.99, max_treedepth=15)
  )

pp_check(model.hi.lstm.extended.prior, nsamples=1e2)
```

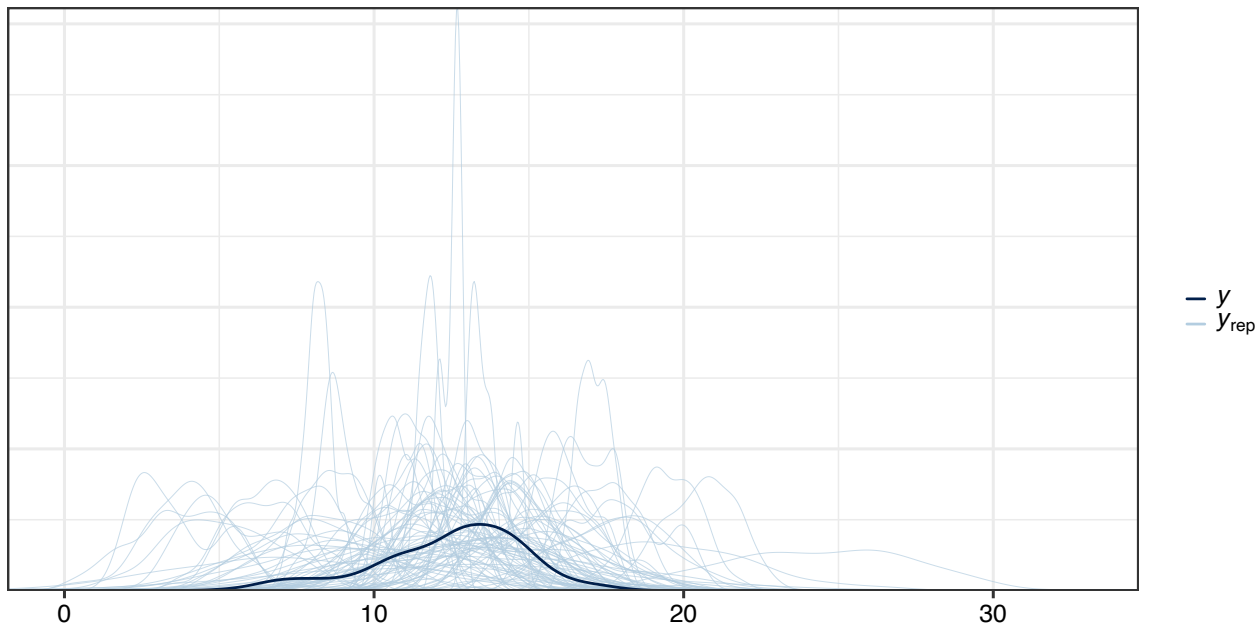

```
pp_check(model.hi.lstm.extended, nsamples=1e2)
```

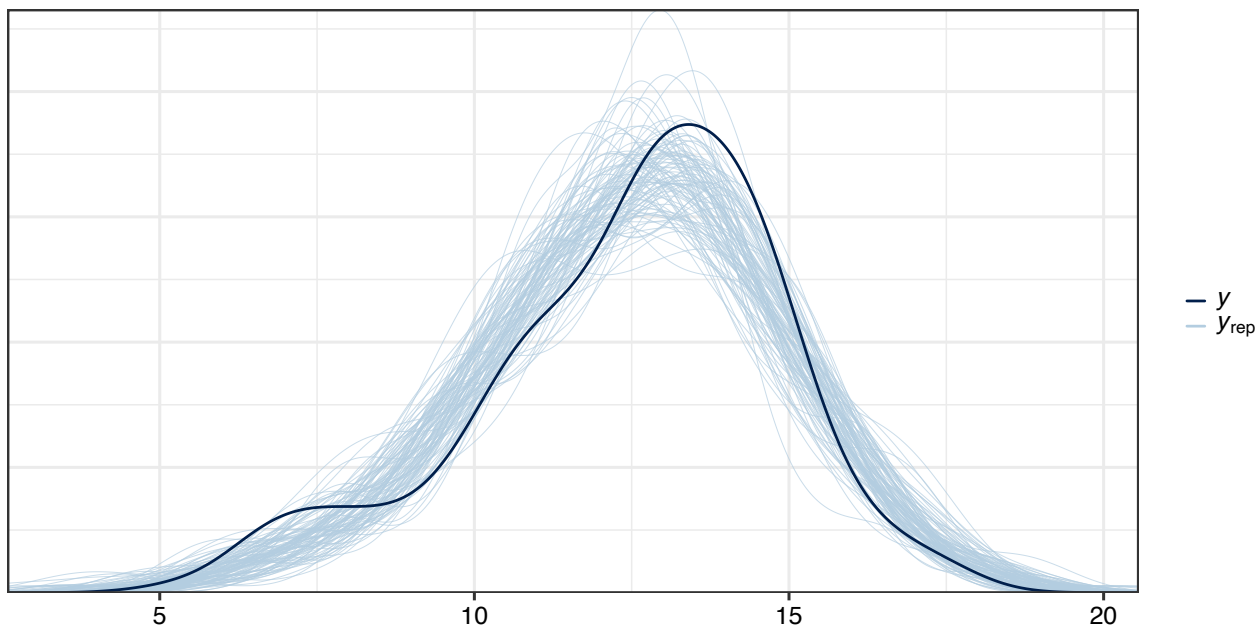

```
loo.m.hi.lstm.ext <- loo(model.hi.lstm.extended, moment_match = T)
loo.m.hi.lstm.ext.null <- loo(model.hi.lstm.extended.null, moment_match = T)
```

```
loo_model_weights(list("hypothesis" = loo.m.hi.lstm.ext ,
                      "null" = loo.m.hi.lstm.ext.null))
```

```
## Method: stacking
## -----
##           weight
## hypothesis 0.896
## null       0.104
```

```
loo_compare(list("hypothesis" = loo.m.hi.lstm.ext,
                "null" = loo.m.hi.lstm.ext.null))
```

```
##           elpd_diff se_diff
## hypothesis  0.0      0.0
## null       -17.9     6.6
```

### Original stimuli, surprisal estimated by transformer

```
model.hi.bert.original <-
  brm(surprisal ~ ambiguity * aspect + (1+ambiguity+aspect|sent_id),
      family = gaussian,
      save_all_pars = T,
      sample_prior = T,
      data = hi.tr.original.m,
      prior = prior.hi,
      file = '../models/hi_tr_original',
      chains = 4, iter = 4000, warmup=1000, cores = 4,
      control = list(adapt_delta = 0.96, max_treedepth=15)
  )

model.hi.bert.original.prior <-
  brm(surprisal ~ ambiguity * aspect + (1+ambiguity+aspect|sent_id),
      family = gaussian,
      sample_prior = 'only',
      file = '../models/hi_bert_original_prior',
      data = hi.tr.original.m,
      prior = prior.hi
  )

model.hi.bert.original.null <-
  brm(surprisal ~ 1 + (1|sent_id),
      family = gaussian,
      save_all_pars = T,
      sample_prior = T,
      data = hi.tr.original.m,
      prior = prior.hi.null,
      file = '../models/hi_tr_original_null',
      chains = 4, iter = 4000, warmup=1000, cores = 4,
      control = list(adapt_delta = 0.96, max_treedepth=15)
  )

pp_check(model.hi.bert.original.prior, nsamples=1e2)
```

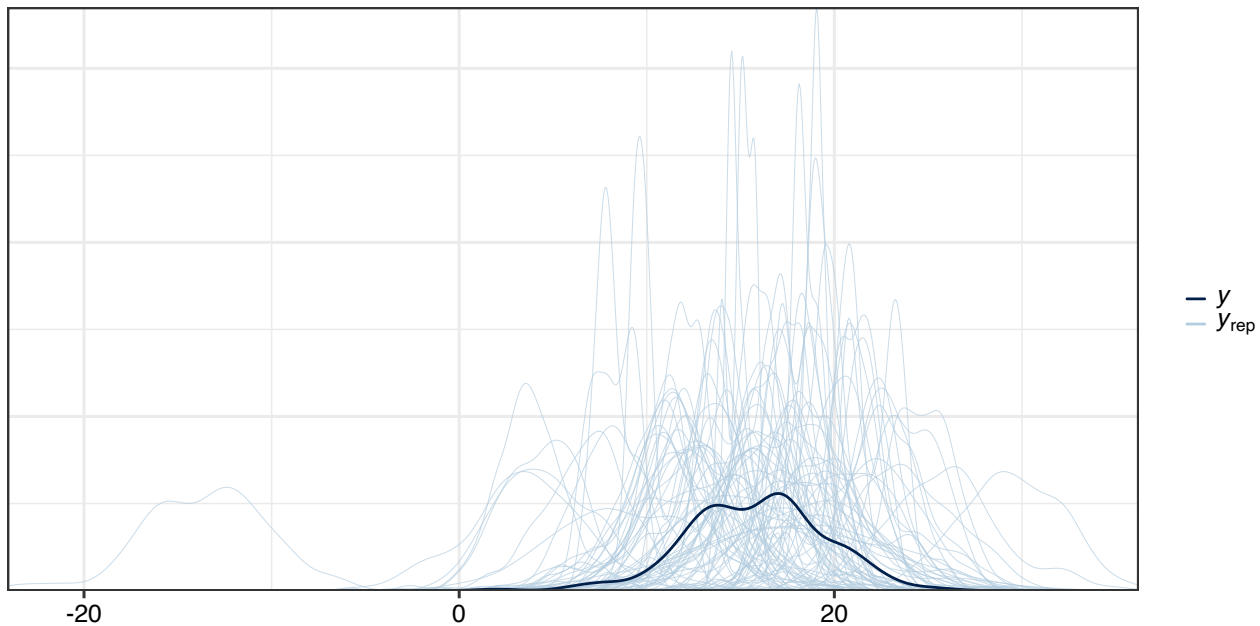

```
pp_check(model.hi.bert.original, nsamples=1e2)
```

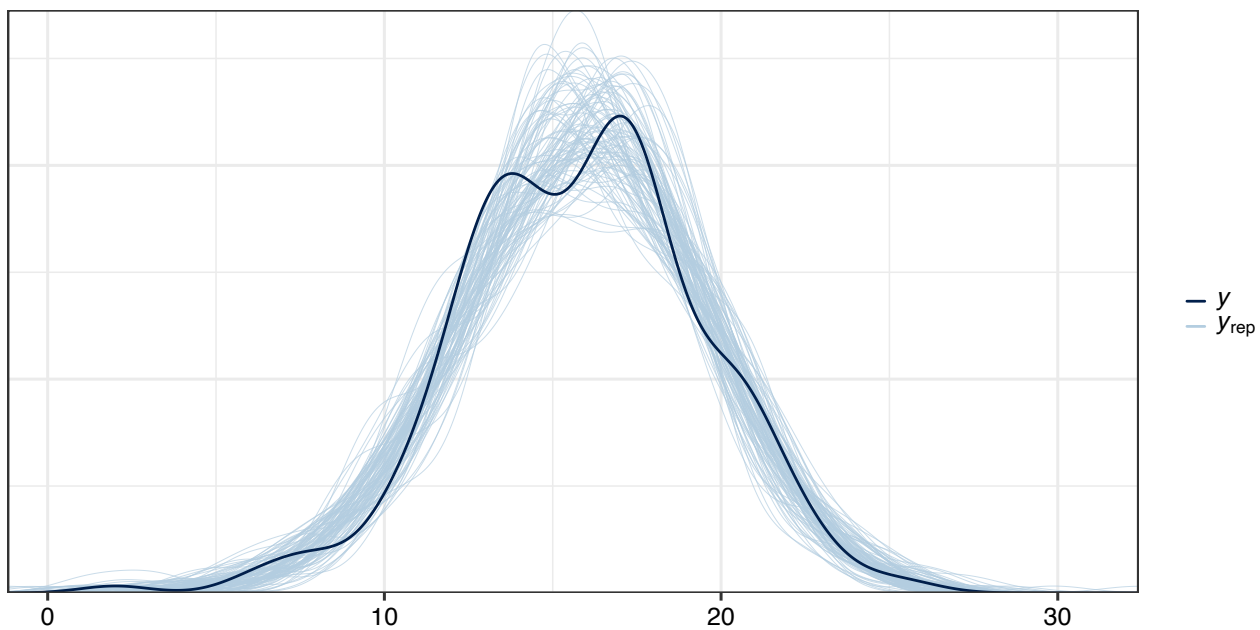

```
loo.m.hi.transformer.orig <- loo(model.hi.bert.original)
loo.m.hi.transformer.orig.null <- loo(model.hi.bert.original.null)
```

```
loo_model_weights(list("hypothesis" = loo.m.hi.transformer.orig ,
                      "null" = loo.m.hi.transformer.orig.null))
```

```
## Method: stacking
## -----
##           weight
## hypothesis 0.970
## null       0.030
```



```
loo_compare(list("hypothesis" = loo.m.hi.transformer.orig,
                "null" = loo.m.hi.transformer.orig.null))
```

```
##           elpd_diff se_diff
## hypothesis  0.0       0.0
## null       -35.2       7.7
```

### Extended stimuli, surprisal estimated by transformer

```
model.hi.bert.extended <-
  brm(surprisal ~ ambiguity * aspect + (1+ambiguity+aspect|sent_id),
      family = gaussian,
      save_pars = save_pars(all = T),
      sample_prior = T,
      data = hi.tr.extended.m,
      prior = prior.hi,
      file = '../models/hi_transformer_extended',
      chains = 4, iter = 4000, warmup=1000, cores = 4,
      control = list(adapt_delta = 0.99, max_treedepth=15)
  )

model.hi.bert.extended.prior <-
  brm(surprisal ~ ambiguity * aspect + (1+ambiguity+aspect|sent_id),
      family = gaussian,
      sample_prior = 'only',
      file = '../models/hi_bert_extended_prior',
      data = hi.tr.extended.m,
      prior = prior.hi
  )

model.hi.bert.extended.null <-
  brm(surprisal ~ 1 + (1|sent_id),
      family = gaussian,
      save_pars = save_pars(all = T),
      sample_prior = T,
      data = hi.tr.extended.m,
      prior = prior.hi.null,
      file = '../models/hi_transformer_extended_null',
      chains = 4, iter = 4000, warmup=1000, cores = 4,
      control = list(adapt_delta = 0.99, max_treedepth=15)
  )

pp_check(model.hi.bert.extended.prior, nsamples=1e2)
```

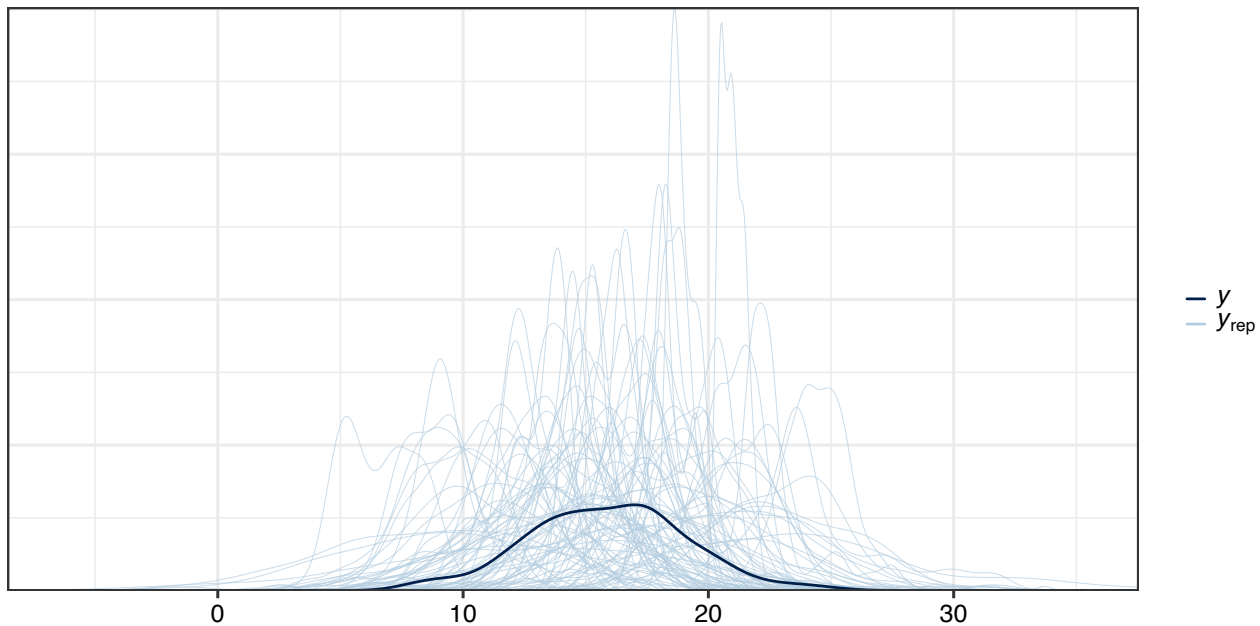

```
pp_check(model.hi.bert.extended, nsamples=1e2)
```

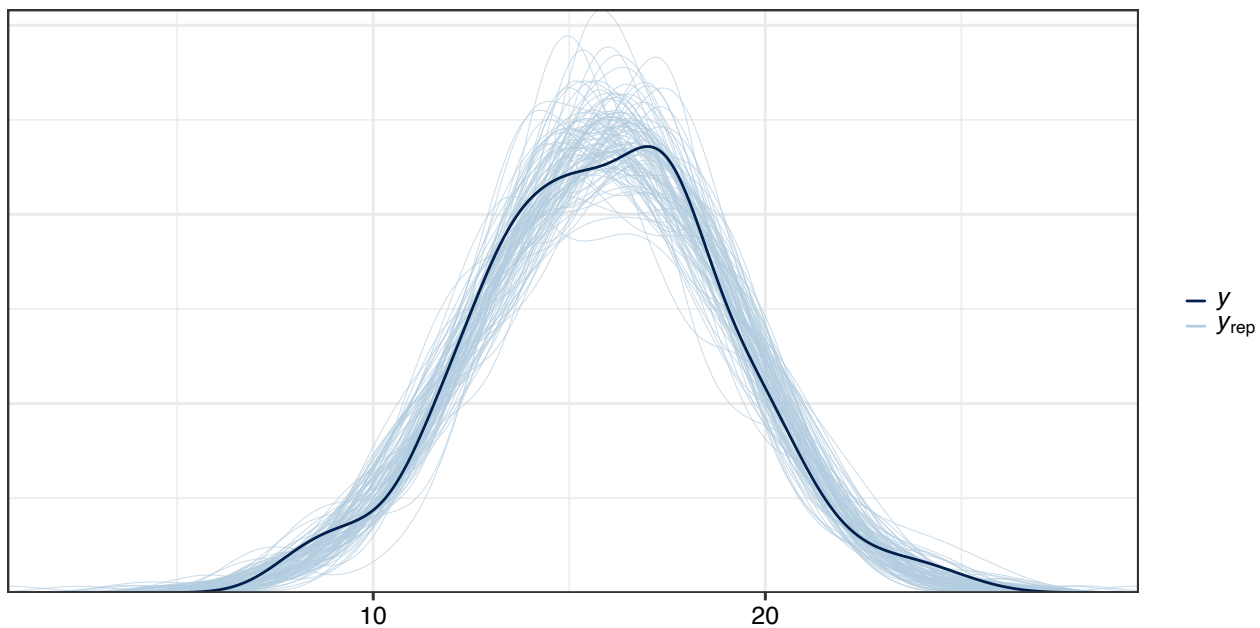

```
loo.m.hi.transformer.ext <- loo(model.hi.bert.extended)
loo.m.hi.transformer.ext.null <- loo(model.hi.bert.extended.null)

loo_model_weights(list("hypothesis" = loo.m.hi.transformer.ext ,
                       "null" = loo.m.hi.transformer.ext.null))
```

```
## Method: stacking
## -----
##           weight
## hypothesis 1.000
## null       0.000
```

```
loo_compare(list("hypothesis" = loo.m.hi.transformer.ext,
               "null" = loo.m.hi.transformer.ext.null))
```

```
##           elpd_diff se_diff
## hypothesis  0.0      0.0
## null       -31.6      7.0
```

Original stimuli, surprisal estimated by GPT-2

```
contrasts(hi.gpt.original.m$ambiguity)
```

```
##          UNAMB
## AMB       0
## UNAMB     1
```

```
contrasts(hi.gpt.original.m$aspect)
```

```
##          PFV
## IPFV     0
## PFV      1
```

```
model.hi.gpt.original <-
  brm(surprisal ~ ambiguity * aspect + (1+ambiguity+aspect|sent_id),
      family = gaussian,
      save_pars = save_pars(all = T),
      sample_prior = T,
      data = hi.gpt.original.m,
      file = '../models/hi_gpt_original_prior',
      prior = prior.hi,
      chains = 4, iter = 4000, warmup=1000, cores = 4,
      control = list(adapt_delta = 0.96, max_treedepth=15)
  )
```

```
model.hi.gpt.original.prior <-
  brm(surprisal ~ ambiguity * aspect + (1+ambiguity+aspect|sent_id),
      family = gaussian,
      sample_prior = 'only',
      file = '../models/hi_gpt_original_prior',
      data = hi.gpt.original.m,
      prior = prior.hi
  )
```

```
model.hi.gpt.original.null <-
  brm(surprisal ~ 1 + (1|sent_id),
      family = gaussian,
      save_pars = save_pars(all = T),
      sample_prior = T,
      data = hi.gpt.original.m,
      prior = prior.hi.null,
      file = '../models/hi_gpt_original_null',
      chains = 4, iter = 4000, warmup=1000, cores = 4,
```

```
control = list(adapt_delta = 0.96, max_treepdepth=15)
)
pp_check(model.hi.gpt.original.prior, nsamples=1e2)
```

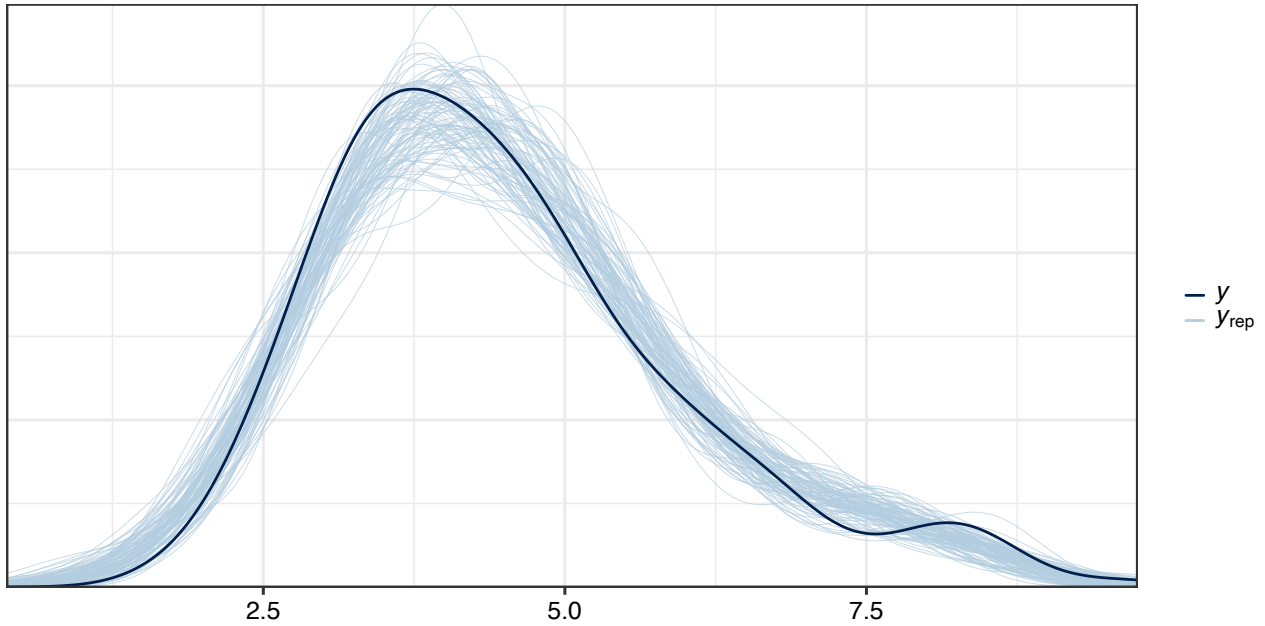

```
pp_check(model.hi.gpt.original, nsamples=1e2)
```

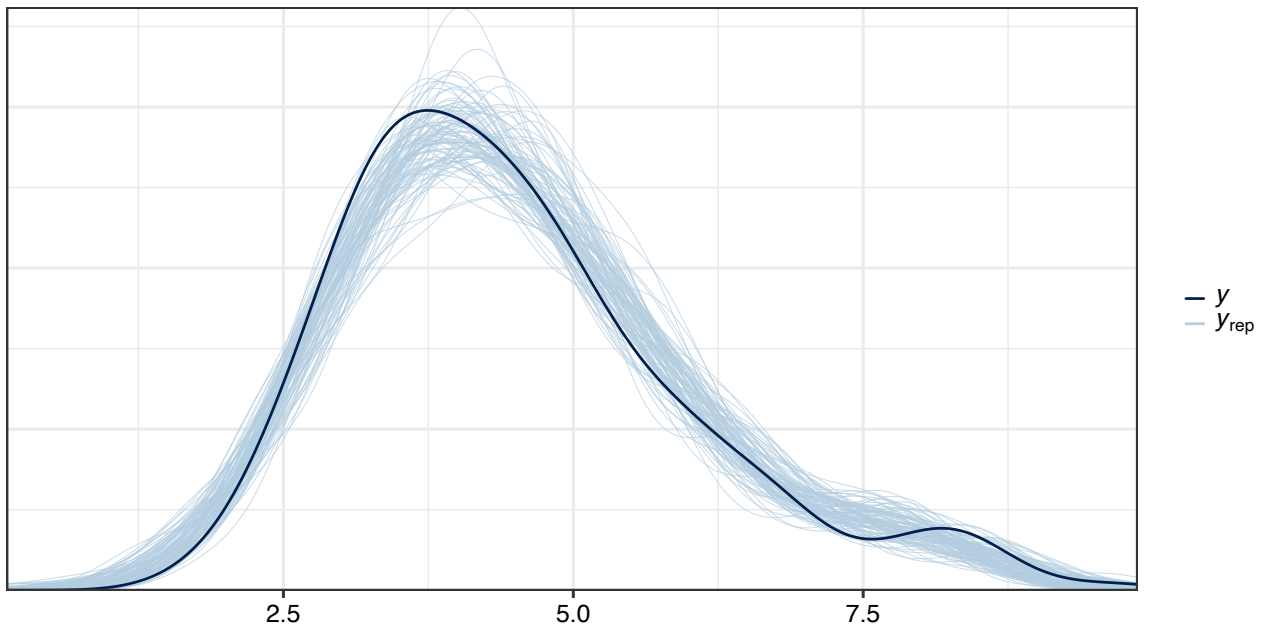

```
loo.m.hi.gpt.orig <- loo(model.hi.gpt.original)
loo.m.hi.gpt.orig.null <- loo(model.hi.gpt.original.null)
loo_model_weights(list("hypothesis" = loo.m.hi.gpt.orig ,
                      "null" = loo.m.hi.gpt.orig.null))
```

```
## Method: stacking
## -----
##           weight
## hypothesis 1.000
## null       0.000
```

```
loo_compare(list("hypothesis" = loo.m.hi.gpt.orig,
                "null" = loo.m.hi.gpt.orig.null))
```

```
##           elpd_diff se_diff
## hypothesis    0.0     0.0
## null        -111.0    11.9
```

### Extended stimuli, surprisal estimated by GPT-2

```
contrasts(hi.gpt.extended.m$ambiguity)
```

```
##           UNAMB
## AMB         0
## UNAMB       1
```

```
contrasts(hi.gpt.extended.m$aspect)
```

```
##           PFV
## IPFV      0
## PFV       1
```

```
model.hi.gpt.extended <-
  brm(surprisal ~ ambiguity * aspect + (1+ambiguity+aspect|sent_id),
      family = gaussian,
      save_pars = save_pars(all = T),
      sample_prior = T,
      data = hi.gpt.extended.m,
      prior = prior.hi,
      file = '../models/hi_gpt_extended',
      chains = 4, iter = 8000, warmup=1000, cores = 4,
      control = list(adapt_delta = 0.996, max_treedepth=15)
  )
```

```
model.hi.gpt.extended.prior <-
  brm(surprisal ~ ambiguity * aspect + (1+ambiguity+aspect|sent_id),
      family = gaussian,
      sample_prior = 'only',
      data = hi.gpt.extended.m,
      file = '../models/hi_gpt_extended_prior',
      prior = prior.hi
  )
```

```
model.hi.gpt.extended.null <-
  brm(surprisal ~ 1 + (1|sent_id),
      family = gaussian,
```

```
save_pars = save_pars(all = T),
sample_prior = T,
data = hi.gpt.extended.m,
prior = prior.hi.null,
file = '../models/hi_gpt_extended_null',
chains = 4, iter = 8000, warmup=1000, cores = 4,
control = list(adapt_delta = 0.99, max_treedepth=15)
)
```

```
pp_check(model.hi.gpt.extended.prior, nsamples=1e2)
```

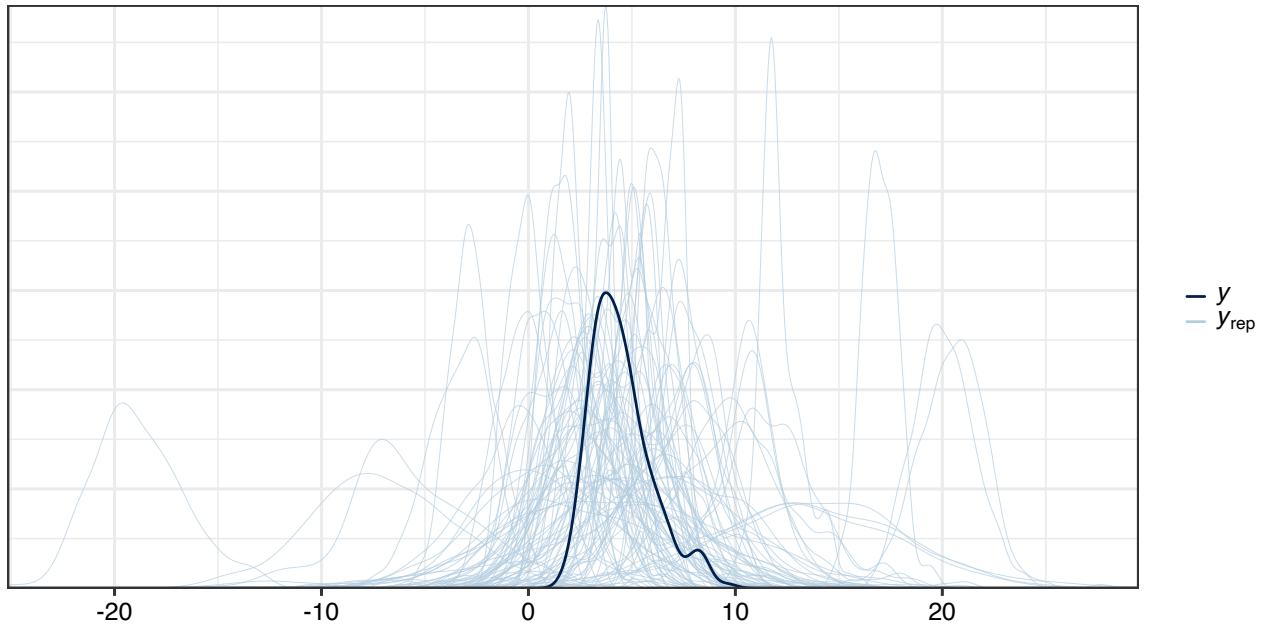

```
pp_check(model.hi.gpt.extended, nsamples=1e2)
```

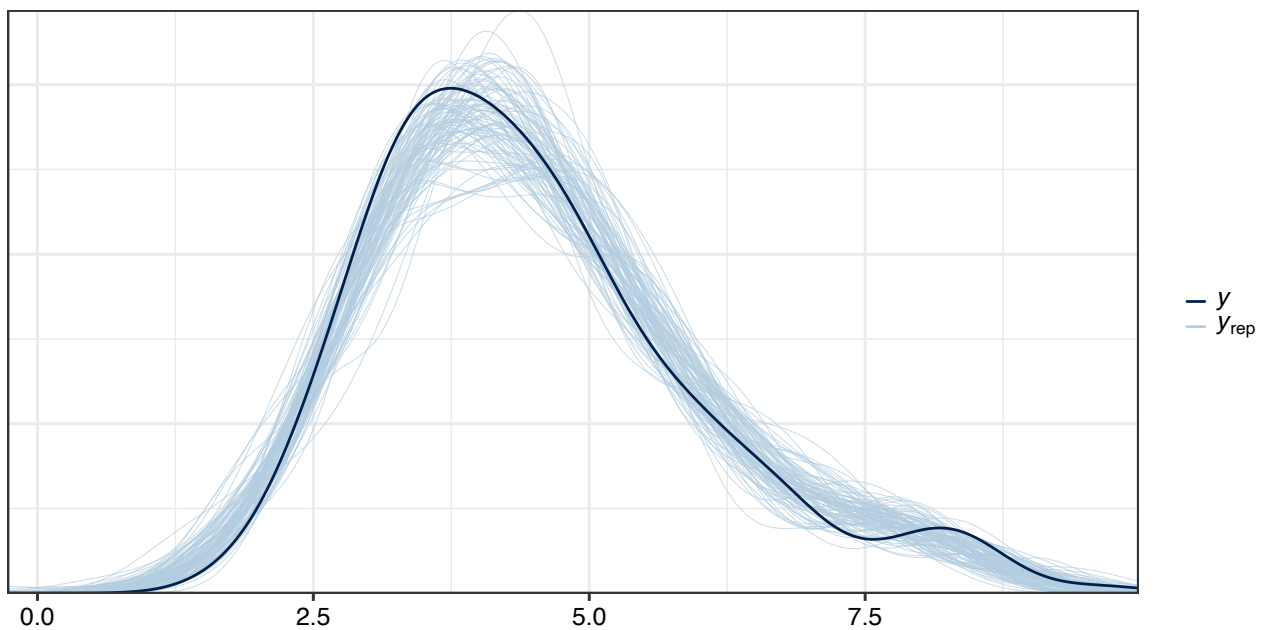

```
loo.m.hi.gpt.ext <- loo(model.hi.gpt.extended)
loo.m.hi.gpt.ext.null <- loo(model.hi.gpt.extended.null)

loo_model_weights(list("hypothesis" = loo.m.hi.gpt.ext ,
                      "null" = loo.m.hi.gpt.ext.null))
```

```
## Method: stacking
## -----
##           weight
## hypothesis 1.000
## null       0.000
```

```
loo_compare(list("hypothesis" = loo.m.hi.gpt.ext,
                "null" = loo.m.hi.gpt.ext.null))
```

```
##           elpd_diff se_diff
## hypothesis    0.0     0.0
## null        -109.9    11.9
```

## Original stimuli, surprisal estimated by LSTM

```
contrasts(eu.lstm.original.m$Semantic.Role)
```

```
##      Erg
## Abs   0
## Erg   1
```

```
contrasts(eu.lstm.original.m$Ambiguity)
```

```
##      Unamb
## Amb     0
## Unamb   1
```

```
prior.eu <- c(
  prior(normal(0,1), class = b),
  prior(gamma(2, 1), class = nu),
  prior(cauchy(0,4), class = sigma),
  prior(cauchy(0,4), class = sd)
)

prior.eu.null <- c(
  prior(gamma(2, 1), class = nu),
  prior(cauchy(0,4), class = sigma)
)

model.basque.lstm.original <-
  brm(surprisal ~ 1 + Semantic.Role*Ambiguity +
      (1 + Semantic.Role + Ambiguity|sent_id),
      family = student(),
      save_pars = save_pars(all = T),
      sample_prior = T,
      prior = prior.eu,
      data = eu.lstm.original.m,
      file = '../models/eu.lstm.original',
      chains = 4, iter = 4000, warmup = 2000, cores = 4,
      control = list(adapt_delta = 0.999, max_treedepth=15)
  )

model.basque.lstm.original.prior <-
  brm(surprisal ~ 1 + Semantic.Role*Ambiguity +
      (1 + Semantic.Role + Ambiguity|sent_id),
      family = student(),
      sample_prior = 'only',
      file = '../models/eu.lstm.original.prior',
      prior = prior.eu,
      data = eu.lstm.original.m
  )

model.null.basque.lstm.original <-
```



```
brm(surprisal ~ 1 + (1|sent_id),  
    family = student(),  
    sample_prior = T,  
    prior = prior.eu.null,  
    data = eu.lstm.original.m,  
    file = '../models/eu.lstm.original_null',  
    chains = 4, iter = 4000, warmup = 2000, cores = 4,  
    control = list(adapt_delta = 0.96, max_treedepth=15)  
)
```

```
pp_check(model.basque.lstm.original.prior, nsamples=1e2)
```

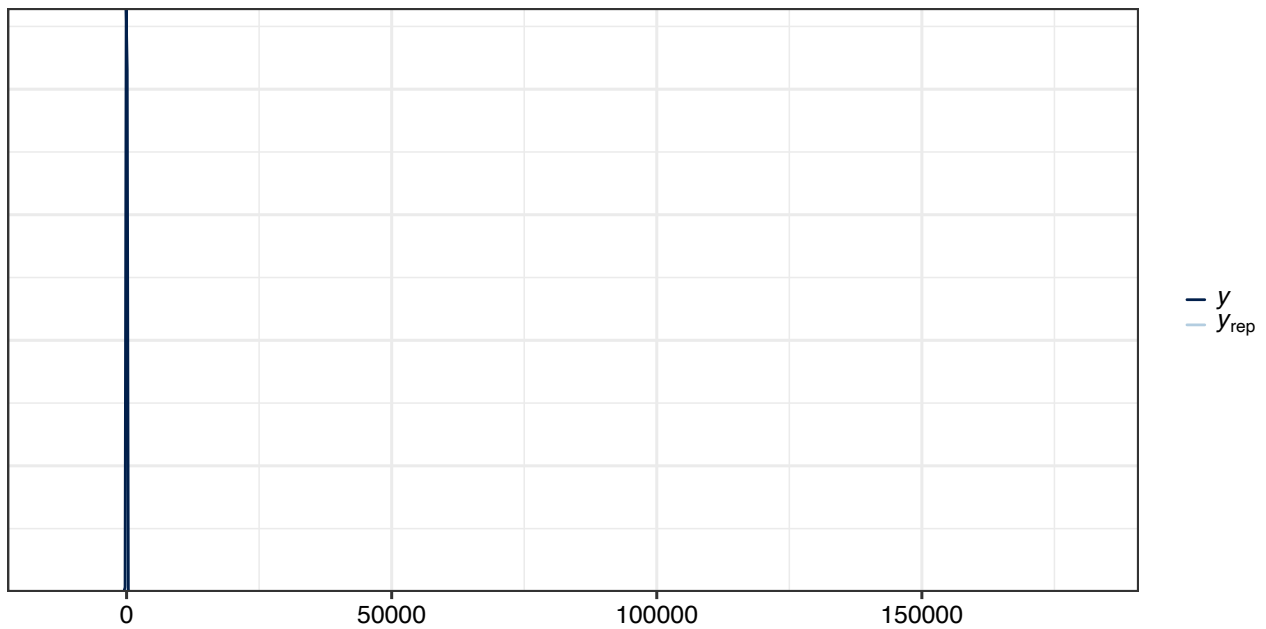

```
pp_check(model.basque.lstm.original, nsamples=1e2)
```

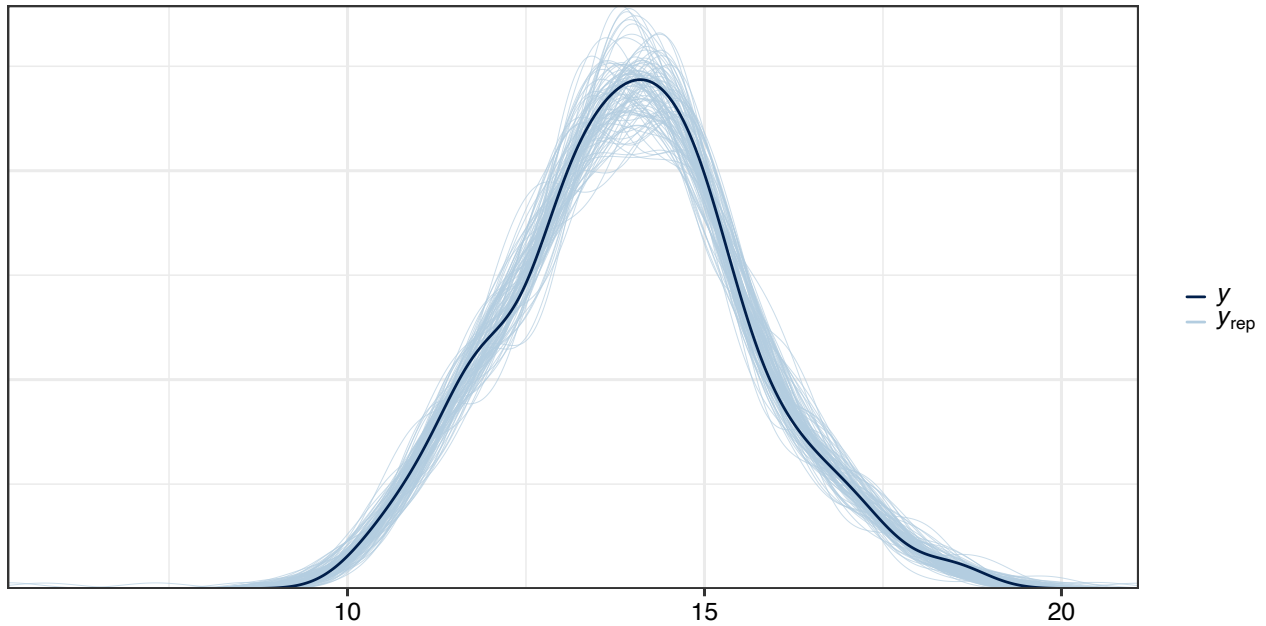

```
loo.m.eu.lstm.orig <- loo(model.basque.lstm.original)
loo.m.eu.lstm.orig.null <- loo(model.null.basque.lstm.original)

loo_model_weights(list("hypothesis" = loo.m.eu.lstm.orig ,
                      "null" = loo.m.eu.lstm.orig.null))
```

```
## Method: stacking
## -----
##           weight
## hypothesis 1.000
## null       0.000
```

```
loo_compare(list("hypothesis" = loo.m.eu.lstm.orig,
                "null" = loo.m.eu.lstm.orig.null))
```

```
##           elpd_diff se_diff
## hypothesis    0.0      0.0
## null        -233.2     19.6
```

### Extended stimuli, surprisal estimated by LSTM

```
contrasts(eu.lstm.extended.m$Ambiguity)
```

```
##           Unamb
## Amb         0
## Unamb       1
```

```
contrasts(eu.lstm.extended.m$Semantic.Role)
```

```
##           Erg
## Abs       0
## Erg       1
```

```

model.basque.lstm.extended <-
  brm(surprisal ~ 1 + Semantic.Role*Ambiguity +
      (1 + Semantic.Role + Ambiguity|sent_id),
      family = student(),
      sample_prior = T,
      prior = prior.eu,
      data = eu.lstm.extended.m,
      file = '../models/eu.lstm.extended',
      chains = 4, iter = 4000, warmup = 2000, cores = 4,
      control = list(adapt_delta = 0.996, max_treedepth=15)
  )

model.basque.lstm.extended.prior <-
  brm(surprisal ~ 1 + Semantic.Role*Ambiguity +
      (1 + Semantic.Role + Ambiguity|sent_id),
      family = student(),
      sample_prior = 'only',
      file = '../models/eu.lstm.extended.prior',
      prior = prior.eu,
      data = eu.lstm.extended.m
  )

model.null.basque.lstm.extended <-
  brm(surprisal ~ 1 + (1|sent_id),
      family =student(),
      sample_prior = T,
      prior = prior.eu.null,
      data = eu.lstm.extended.m,
      file = '../models/eu.lstm.extended_null',
      chains = 4, iter = 4000, warmup = 2000, cores = 4,
      control = list(adapt_delta = 0.96, max_treedepth=15)
  )

pp_check(model.basque.lstm.extended.prior, nsamples=1e2)

```

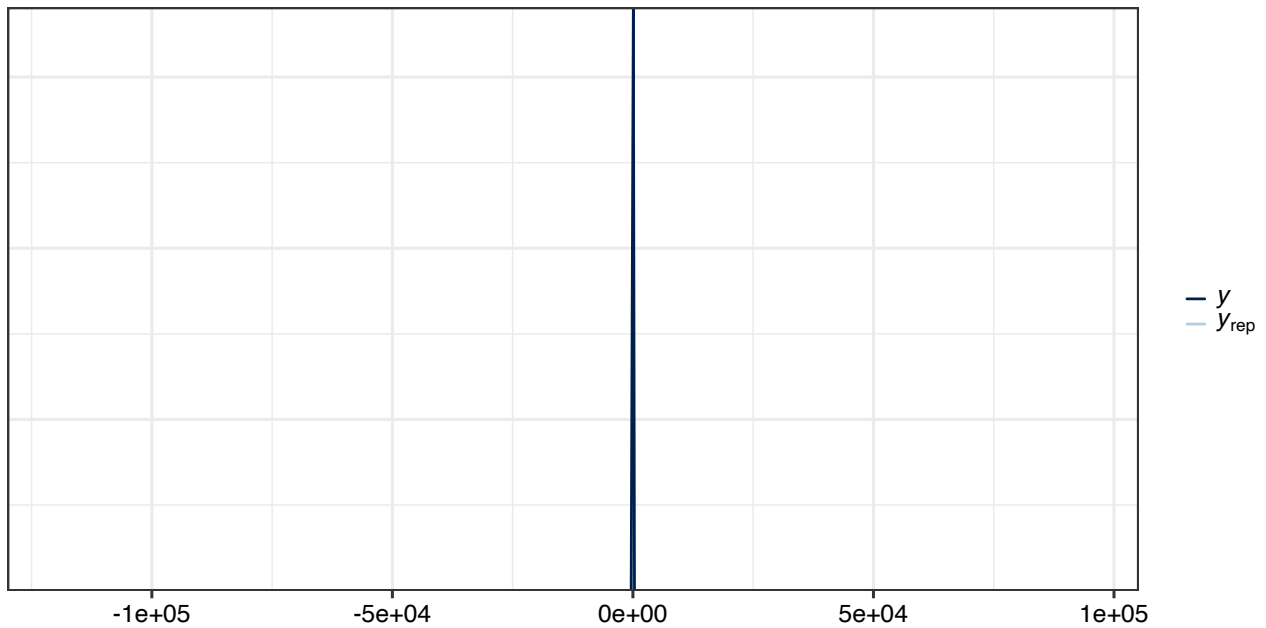

```
pp_check(model.basque.lstm.extended, nsamples=1e2)
```

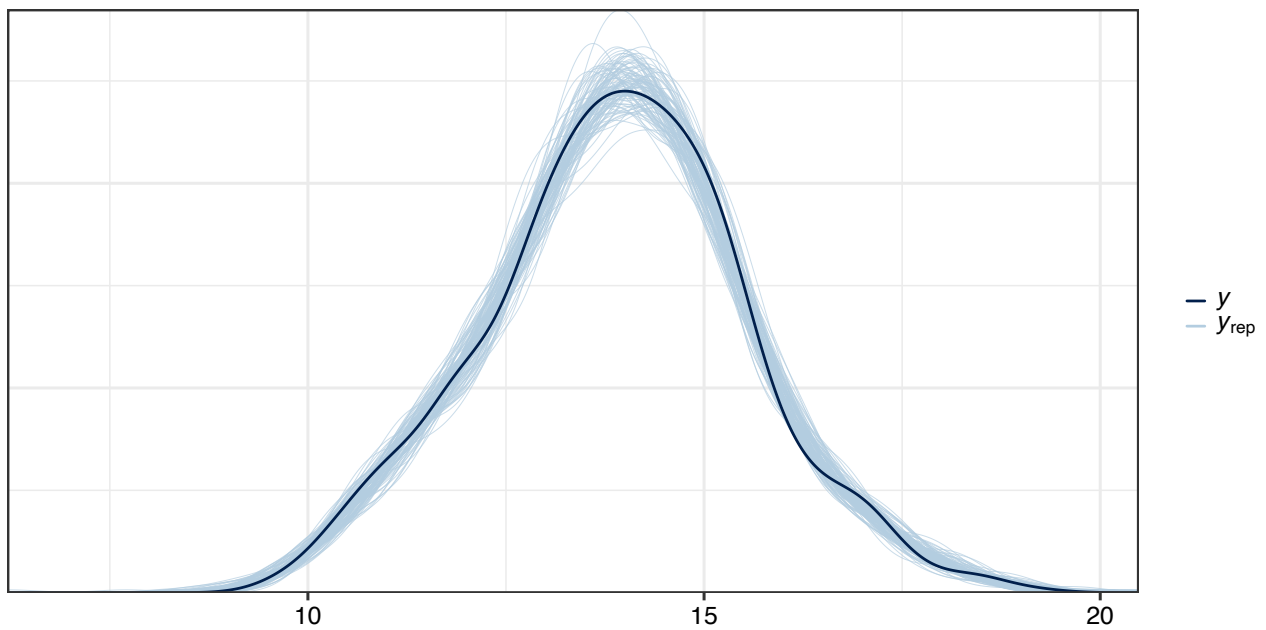

```
loo.m.eu.lstm.ext <- loo(model.basque.lstm.extended)
loo.m.eu.lstm.ext.null <- loo(model.null.basque.lstm.extended)
```

```
loo_model_weights(list("hypothesis" = loo.m.eu.lstm.ext ,
                       "null" = loo.m.eu.lstm.ext.null))
```

```
## Method: stacking
## -----
##           weight
## hypothesis 1.000
## null       0.000
```

## Original stimuli, surprisal estimated by RoBERTa

```
contrasts(eu.tr.original.m$Ambiguity)
```

```
##      Unamb
## Amb      0
## Unamb    1
```

```
contrasts(eu.tr.original.m$Semantic.Role)
```

```
##      Erg
## Abs    0
## Erg    1
```

```
model.basque.tr.original <-
  brm(surprisal ~ 1 + Semantic.Role*Ambiguity +
      (1 + Semantic.Role + Ambiguity|sent_id),
      family = student(),
      save_pars = save_pars(all = T),
      sample_prior = T,
      prior = prior.eu,
      data = eu.tr.original.m,
      file = '../models/eu.tr.original',
      chains = 4, iter = 8000, warmup = 2000, cores = 4,
      control = list(adapt_delta = 0.999, max_treedepth=15)
  )
```

```
model.basque.tr.original.prior <-
  brm(surprisal ~ 1 + Semantic.Role*Ambiguity +
      (1 + Semantic.Role + Ambiguity|sent_id),
      family = student(),
      sample_prior = 'only',
      file = '../models/eu.tr.original.prior',
      prior = prior.eu,
      data = eu.tr.original.m)
```

```
model.null.basque.tr.original <-
  brm(surprisal ~ 1 + (1|sent_id),
      family = student(),
      save_pars = save_pars(all = T),
      sample_prior = T,
      prior = prior.eu.null,
      data = eu.tr.original.m,
      file = '../models/eu.tr.original_null',
      chains = 4, iter = 8000, warmup = 2000, cores = 4,
      control = list(adapt_delta = 0.999, max_treedepth=15)
  )
```

```
pp_check(model.basque.tr.original.prior, nsamples=1e2)
```

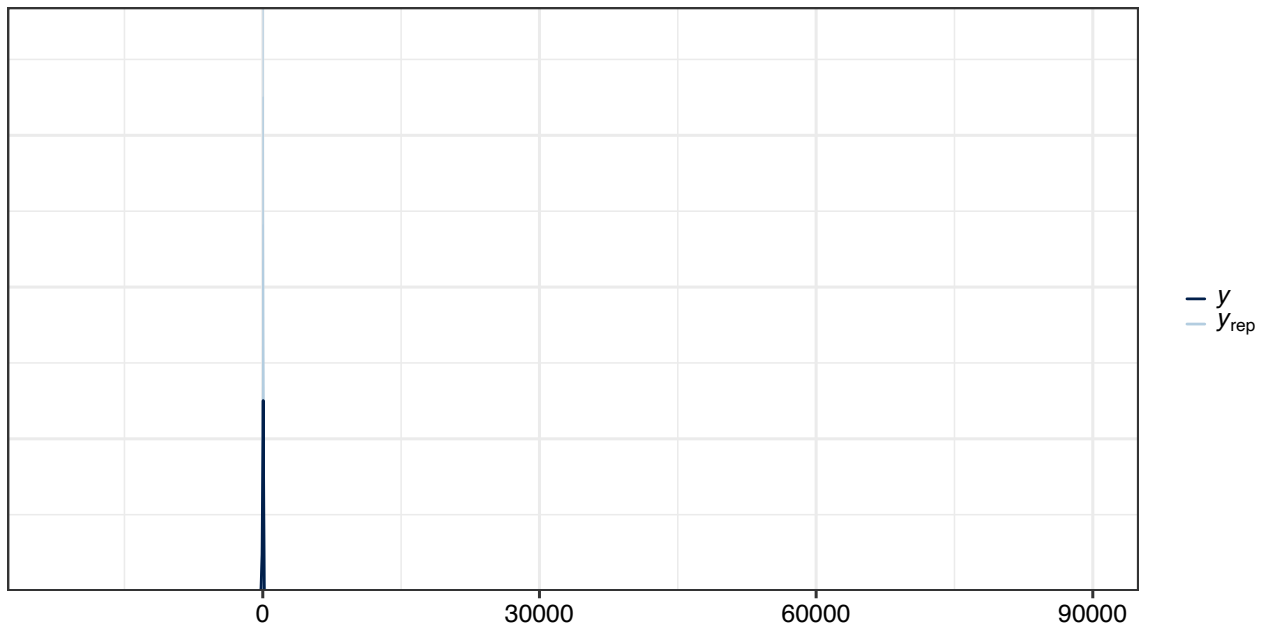

```
pp_check(model.basque.tr.original, nsamples=1e2)
```

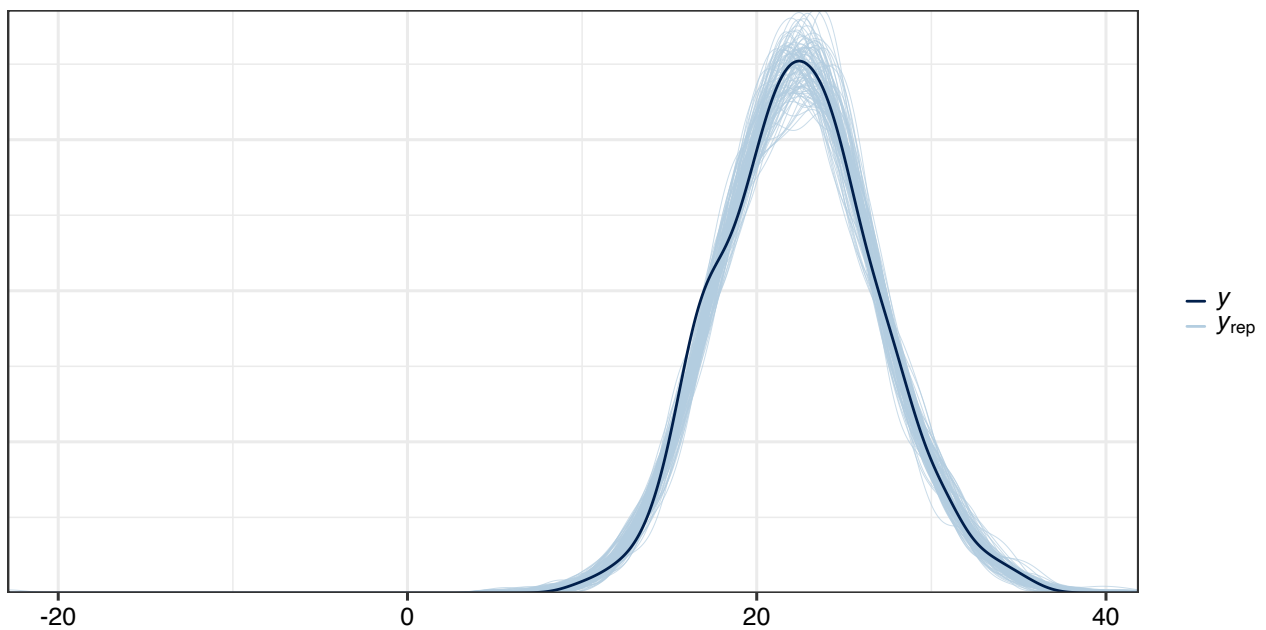

```
loo.m.eu.tr.orig <- loo(model.basque.tr.original)
loo.m.eu.tr.orig.null <- loo(model.null.basque.tr.original)
```

```
loo_model_weights(list("hypothesis" = loo.m.eu.tr.orig ,
                      "null" = loo.m.eu.tr.orig.null))
```

```
## Method: stacking
## -----
##           weight
## hypothesis 1.000
## null       0.000
```

```
loo_compare(list("hypothesis" = loo.m.eu.tr.orig,  
               "null" = loo.m.eu.tr.orig.null))
```

```
##           elpd_diff se_diff  
## hypothesis    0.0     0.0  
## null         -261.3    20.1
```

Extended stimuli, surprisal estimated by RoBERTa

```
contrasts(eu.tr.extended.m$Ambiguity)
```

```
##           Unamb  
## Amb         0  
## Unamb       1
```

```
contrasts(eu.tr.extended.m$Semantic.Role)
```

```
##           Erg  
## Abs       0  
## Erg       1
```

```
model.basque.tr.extended <-  
  brm(surprisal ~ 1 + Semantic.Role*Ambiguity +  
       (1 + Semantic.Role + Ambiguity|sent_id),  
       family = student(),  
       save_pars = save_pars(all = T),  
       sample_prior = T,  
       prior = prior.eu,  
       data = eu.tr.extended.m,  
       file = '../models/eu.tr.extended',  
       chains = 4, iter = 4000, warmup = 2000, cores = 4,  
       control = list(adapt_delta = 0.96, max_treedepth=15)  
  )
```

```
model.basque.tr.extended.prior <-  
  brm(surprisal ~ 1 + Semantic.Role *Ambiguity +  
       (1 + Semantic.Role + Ambiguity|sent_id),  
       family = student(),  
       sample_prior = 'only',  
       file = '../models/eu.tr.extended.prior',  
       prior = prior.eu,  
       data = eu.tr.extended.m  
  )
```

```
model.null.basque.tr.extended <-  
  brm(surprisal ~ 1 + (1|sent_id),  
       family = student(),  
       save_pars = save_pars(all = T),  
       sample_prior = T,  
       prior = prior.eu.null,  
       data = eu.tr.extended.m,
```

```
file = './models/eu.tr.extended_null',  
chains = 4, iter = 4000, warmup = 2000, cores = 4,  
control = list(adapt_delta = 0.96, max_treedepth=15)  
)
```

```
pp_check(model.basque.tr.extended.prior, nsamples=1e2)
```

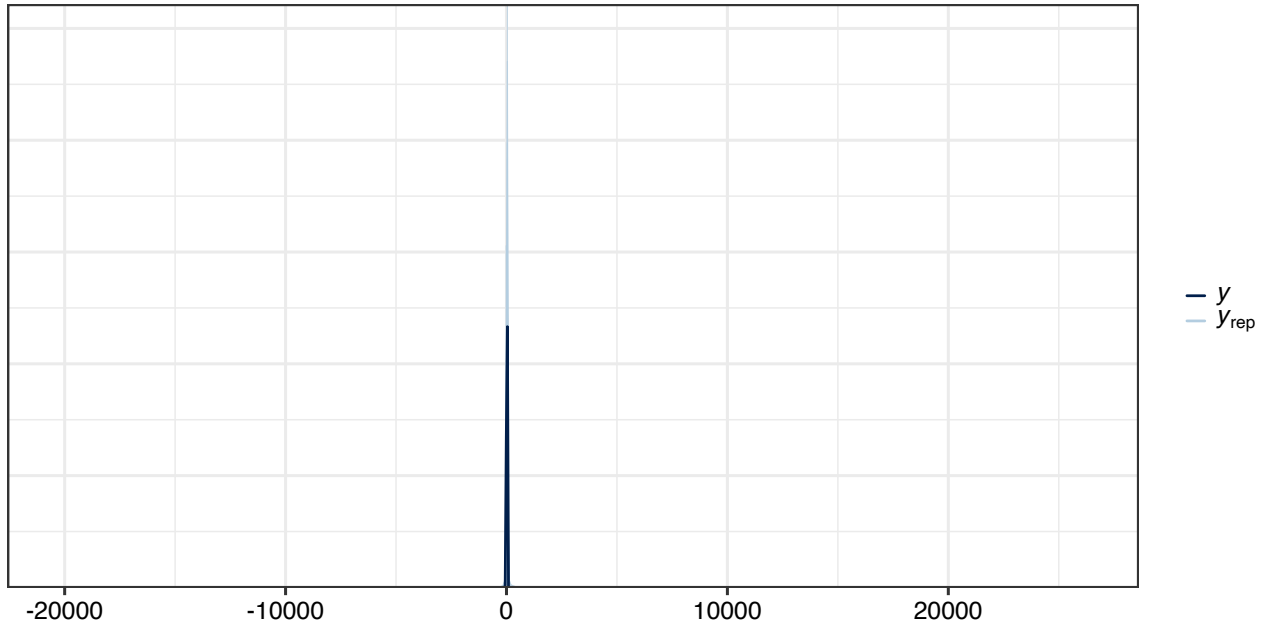

```
pp_check(model.basque.tr.extended, nsamples=1e2)
```

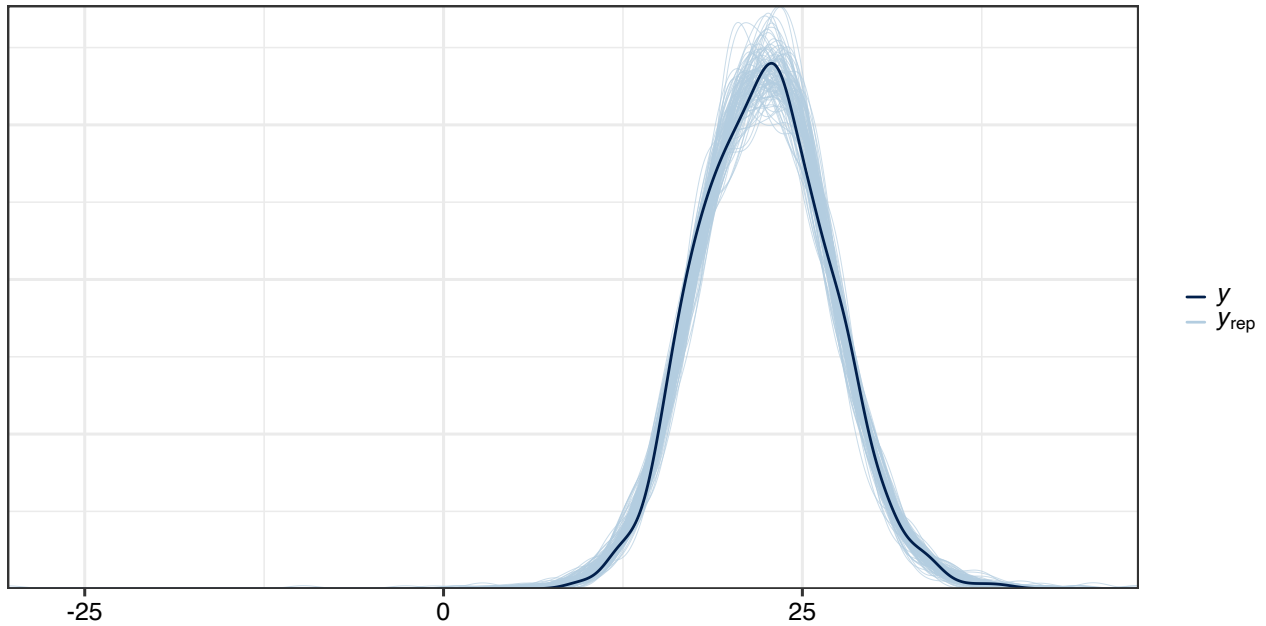

```
loo.m.eu.tr.ext <- loo(model.basque.tr.extended)  
loo.m.eu.tr.ext.null <- loo(model.null.basque.tr.extended)
```



```
loo_model_weights(list("hypothesis" = loo.m.eu.tr.ext ,
                      "null" = loo.m.eu.tr.ext.null))
```

```
## Method: stacking
## -----
##           weight
## hypothesis 1.000
## null       0.000
```

Original stimuli, surprisal estimated by GPT-2

```
contrasts(eu.gpt.original.m$Ambiguity)
```

```
##      Unamb
## Amb      0
## Unamb    1
```

```
contrasts(eu.gpt.original.m$Semantic.Role)
```

```
##      Erg
## Abs    0
## Erg    1
```

```
model.basque.gpt.original <-
  brm(surprisal ~ 1 + Semantic.Role*Ambiguity +
      (1 + Semantic.Role + Ambiguity|sent_id),
      family = student(),
      save_pars = save_pars(all = T),
      sample_prior = T,
      prior = prior.eu,
      data = eu.gpt.original.m,
      file = '../models/eu.gpt.original',
      chains = 4, iter = 8000, warmup = 2000, cores = 4,
      control = list(adapt_delta = 0.96, max_treedepth=15)
  )
```

```
model.basque.gpt.original.prior <-
  brm(surprisal ~ 1 + Semantic.Role*Ambiguity +
      (1 + Semantic.Role + Ambiguity|sent_id),
      family = student(),
      sample_prior = 'only',
      file = '../models/eu.gpt.original.prior',
      prior = prior.eu,
      data = eu.gpt.original.m
  )
```

```
model.null.basque.gpt.original <-
  brm(surprisal ~ 1 + (1|sent_id),
      family = student(),
      save_pars = save_pars(all = T),
      sample_prior = T,
```

```
prior = prior.eu.null,  
data = eu.gpt.original.m,  
file = '../models/eu.gpt.original_null',  
chains = 4, iter = 8000, warmup = 2000, cores = 4,  
control = list(adapt_delta = 0.96, max_tredepth=15)  
)
```

```
pp_check(model.basque.gpt.original.prior, nsamples=1e2)
```

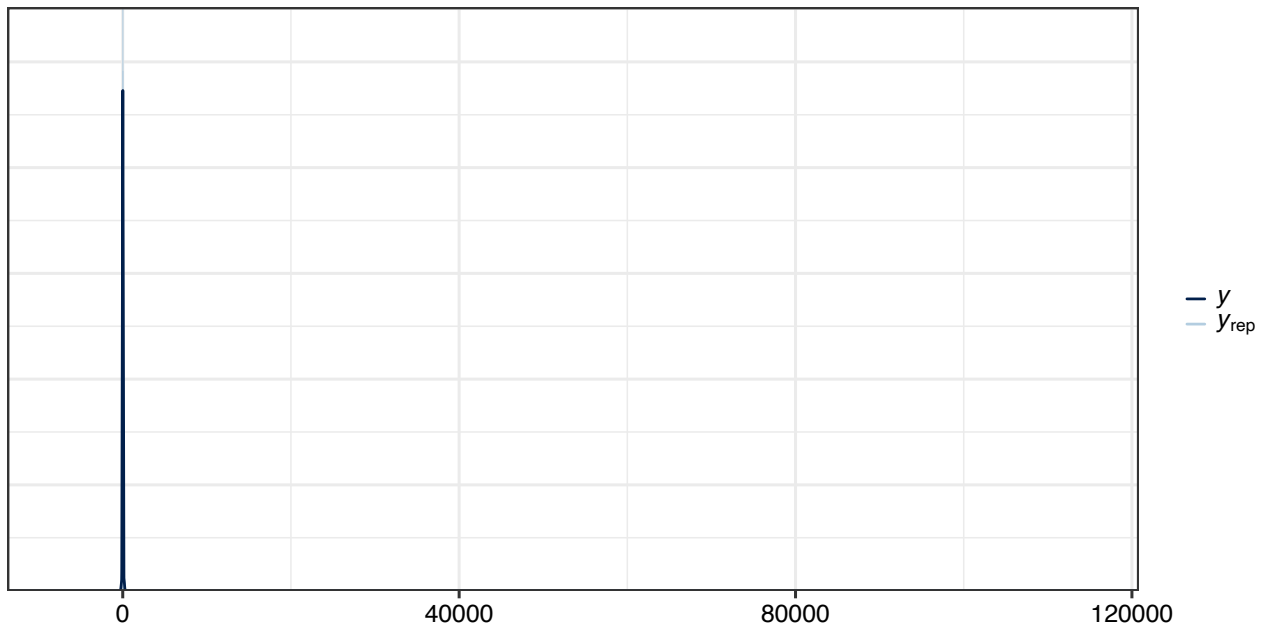

```
pp_check(model.basque.gpt.original, nsamples=1e2)
```

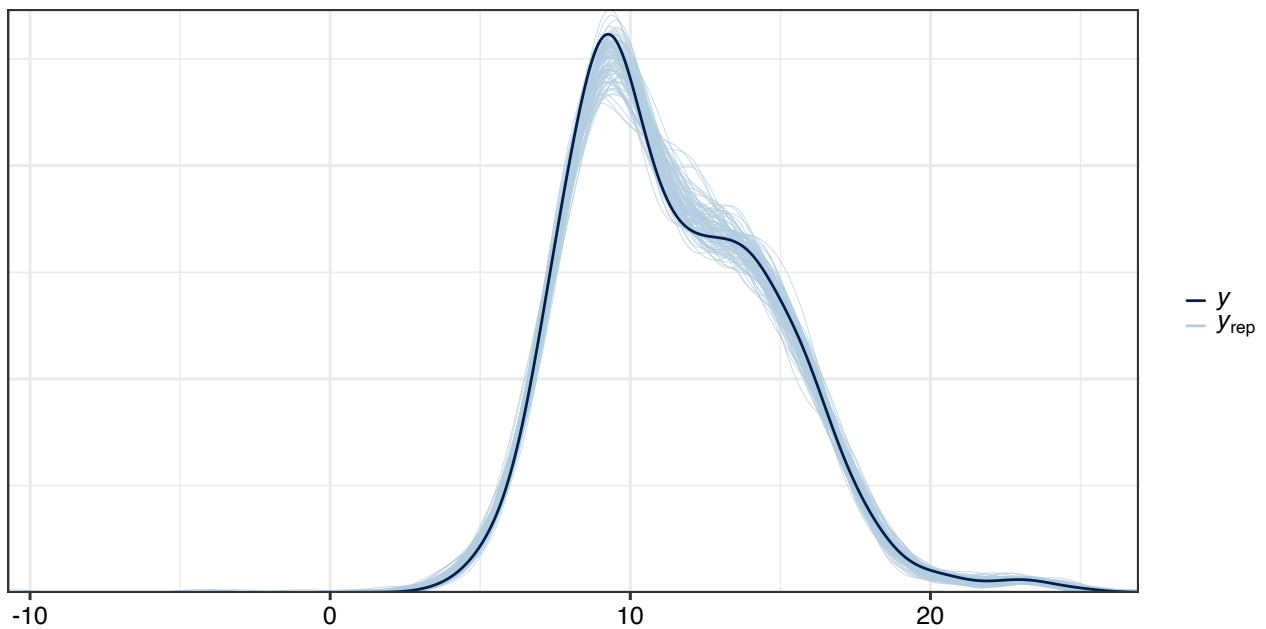

```

loo.m.eu.gpt.orig <- loo(model.basque.gpt.original)
loo.m.eu.gpt.orig.null <- loo(model.null.basque.gpt.original)

loo_model_weights(list("hypothesis" = loo.m.eu.gpt.orig ,
                      "null" = loo.m.eu.gpt.orig.null))

```

```

## Method: stacking
## -----
##           weight
## hypothesis 0.995
## null       0.005

```

### Extended stimuli, surprisal estimated by GPT-2

```

contrasts(eu.gpt.extended.m$Ambiguity)

```

```

##           Unamb
## Amb         0
## Unamb       1

```

```

contrasts(eu.gpt.extended.m$Semantic.Role)

```

```

##           Erg
## Abs       0
## Erg       1

```

```

model.basque.gpt.extended <-
  brm(surprisal ~ 1 + Semantic.Role*Ambiguity +
      (1 + Semantic.Role + Ambiguity|sent_id),
      family = student(),
      save_pars = save_pars(all = T),
      sample_prior = T,
      prior = prior.eu,
      data = eu.gpt.extended.m,
      file = '../models/eu.gpt.extended',
      chains = 4, iter = 8000, warmup = 2000, cores = 4,
      control = list(adapt_delta = 0.96, max_treedepth=15)
  )

```

```

model.basque.gpt.extended.prior <-
  brm(surprisal ~ 1 + Semantic.Role*Ambiguity +
      (1 + Semantic.Role + Ambiguity|sent_id),
      family = student(),
      sample_prior = 'only',
      file = '../models/eu.gpt.extended.prior',
      prior = prior.eu,
      data = eu.gpt.extended.m
  )

```

```

model.null.basque.gpt.extended <-
  brm(surprisal ~ 1 + (1|sent_id),

```

```
family = student(),
save_pars = save_pars(all = T),
sample_prior = T,
prior = prior.eu.null,
data = eu.gpt.extended.m,
file = '../models/eu.gpt.extended_null',
chains = 4, iter = 8000, warmup = 2000, cores = 4,
control = list(adapt_delta = 0.96, max_tredepth=15)
)
```

```
pp_check(model.basque.gpt.extended.prior, nsamples=1e2)
```

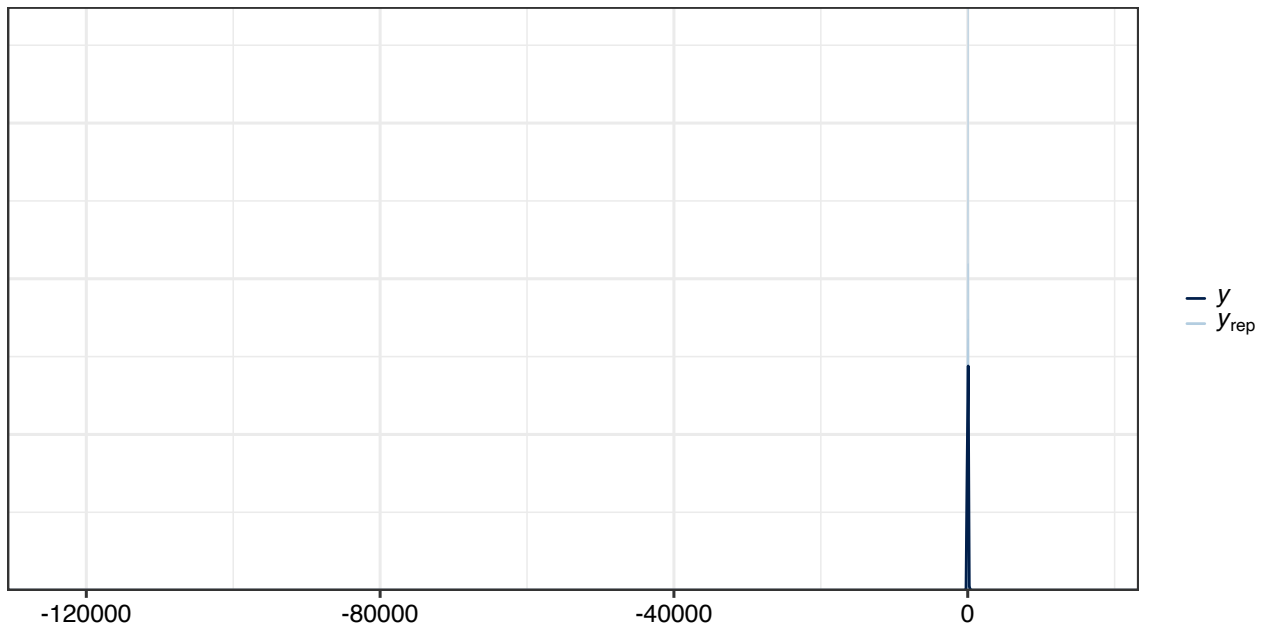

```
pp_check(model.basque.gpt.extended, nsamples=1e2)
```

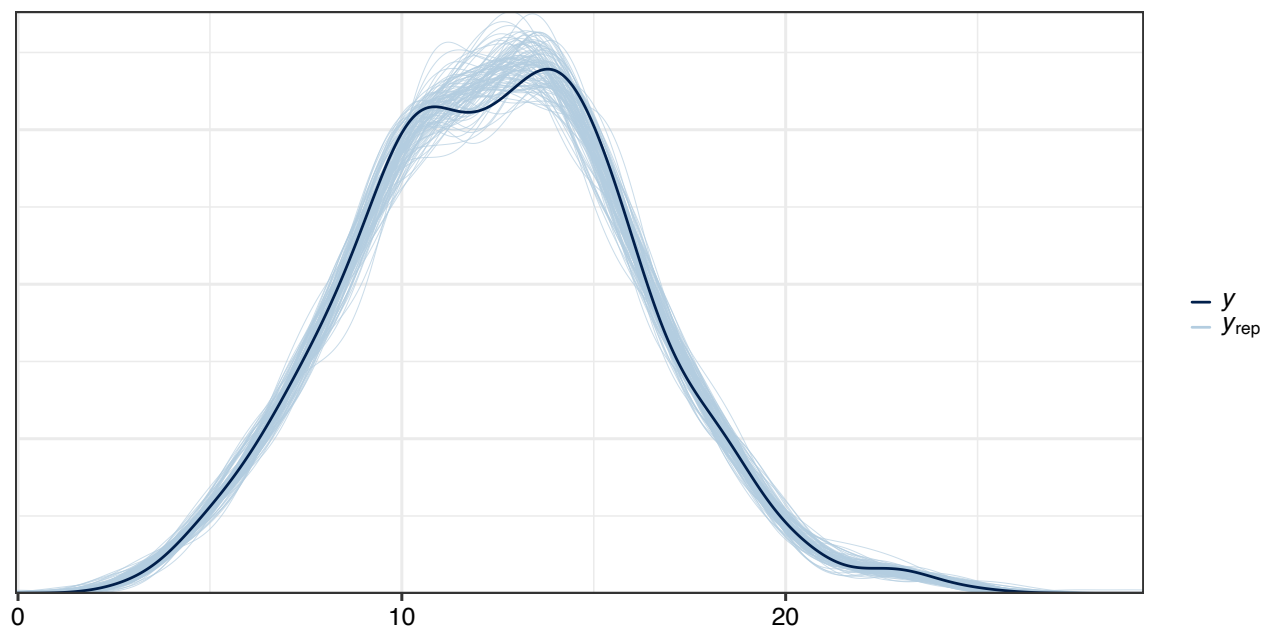

```
loo.m.eu.gpt.ext <- loo(model.basque.gpt.extended)
loo.m.eu.gpt.ext.null <- loo(model.null.basque.gpt.extended)

loo_model_weights(list("hypothesis" = loo.m.eu.gpt.ext ,
                      "null" = loo.m.eu.gpt.ext.null))
```

```
## Method: stacking
## -----
##           weight
## hypothesis 1.000
## null       0.000
```

### S3.3 Posterior Distributions

Now we sample estimated surprisal values from posterior distribution of the fitted models for each group level and main effect. We calculate the posterior distributions of *Delta Surprisal* estimates between the condition that elicited the Predicate N400 (patient initial) minus the condition where it is not expected (agent initial).

S4, S6 and S8 displays the credibility intervals and means for each model and condition for the original dataset and S5, S7 and S9 for the extended datasets. The plots in S1/S6/S11, S2/ S7/ S12 and S3/S8/S13 show posterior distributions *Delta Surprisal* for both population and group levels. S4/S9/S14 and S5/S10/S15 shows posterior predictions at the population level for both extended and original datasets. One can see that the posterior distributions of *Delta Surprisal* are similar between the original and the extended dataset.

Lastly, the results from the paired t-tests mirror the results from the multilevel Bayesian models.

```
if (!file.exists("../temp_data/post_samples_de_lstm_orig.rds")){

  draws.de.lstm <- model.de.lstm.original %>%
    spread_draws(r_sent[sent,term], b_Intercept, b_verb.typedat,
                 b_first.NPobject, `b_verb.typedat:first.NPobject`)

  # calculate estimates of each condition level
  draws.de.lstm <- draws.de.lstm %>%
    mutate(AgentACC = b_Intercept,
           AgentDAT = b_Intercept + b_verb.typedat,
           PatientACC = b_Intercept + b_first.NPobject,
           PatientDAT = b_Intercept + b_verb.typedat + b_first.NPobject +
             `b_verb.typedat:first.NPobject`) %>%
    select(!starts_with('b')) %>%
    pivot_wider(names_from = c('sent', 'term'), values_from = r_sent) %>%
    select(!matches('.iteration|.chain'))

  draws.de.lstm <- draws.de.lstm %>%
    pivot_longer(!.draw, values_to = 'surprisal', names_to = 'Condition') %>%
    mutate(Condition = ifelse(!grepl('_', Condition),
                              paste0('Population_', Condition), Condition)) %>%
    separate(Condition, c('Level', 'Condition'), sep='_')

  draws.de.lstm.pop <- draws.de.lstm %>% filter(Level %in% 'Population ')
  draws.de.lstm.randomlevel <- draws.de.lstm %>%
    filter(!Level %in% 'Population ')

  draws.de.lstm.pop <- draws.de.lstm.pop %>%
    pivot_wider(names_from = Condition, values_from = surprisal)

  de.lstm.pop.diff <- draws.de.lstm.pop %>%
    mutate(diff_ACC = PatientACC - AgentACC) %>%
    mutate(diff_DAT = PatientDAT - AgentDAT) %>%
    select(.draw, Level, diff_ACC, diff_DAT)

  #AgentDAT, AgentACC, PatientDAT, PatientACC

  draws.de.lstm.randomlevel <- draws.de.lstm.randomlevel %>%
    group_by(.draw, Level) %>%
    mutate('PatientACC' = surprisal[Condition == 'Intercept'] +
           surprisal[Condition=='first.NPobject']) %>%
```

```

mutate('PatenDAT' = surprisal[Condition == 'first.NPobject'] +
       surprisal[Condition == 'verb.typedat'] ) %>%
mutate('AgentACC' = surprisal[Condition == 'Intercept']) %>%
mutate('AgentDAT' = surprisal[Condition == 'Intercept'] +
       surprisal[Condition == 'verb.typedat']) %>%
select(-Condition, -surprisal) %>%
distinct()

de.lstm.randomlevel.diff <- draws.de.lstm.randomlevel %>%
mutate(diff_DAT = PatienDAT - AgentDAT) %>%
mutate(diff_ACC = PatientACC - AgentACC) %>%
select(.draw, Level, diff_ACC, diff_DAT)

draws.de.lstm.all <- rbind(de.lstm.pop.diff, de.lstm.randomlevel.diff)

draws.de.lstm.all.long <- draws.de.lstm.all %>%
select(diff_DAT, diff_ACC, Level, .draw) %>%
pivot_longer(!c('Level', '.draw'), names_to = 'Condition',
             values_to = 'delta_surprisal')

saveRDS(draws.de.lstm.all.long, '../temp_data/post_samples_de_lstm_orig.rds')
}

if (!file.exists('../temp_data/post_samples_de_lstm_ext.rds')){
draws.de.lstm <- model.de.lstm.extended %>%
spread_draws(r_sent_id[sent_id,term], b_Intercept,
             b_verb.typedat,b_first.NPobject,
             `b_verb.typedat:first.NPobject`)

draws.de.lstm <- draws.de.lstm %>%
mutate(AgentACC = b_Intercept,
       AgentDAT = b_Intercept + b_verb.typedat,
       PatientACC = b_Intercept + b_first.NPobject,
       PatientDAT = b_Intercept + b_verb.typedat + b_first.NPobject +
         `b_verb.typedat:first.NPobject`) %>%
select(!starts_with('b')) %>%
pivot_wider(names_from = c('sent_id', 'term'), values_from = r_sent_id) %>%
select(!matches('.iteration|.chain'))

draws.de.lstm <- draws.de.lstm %>%
pivot_longer(!.draw, values_to = 'surprisal', names_to = 'Condition') %>%
mutate(Condition = ifelse(!grepl('_', Condition),
                        paste0('Population_', Condition), Condition)) %>%
separate(Condition, c('Level', 'Condition'), sep='_')

draws.de.lstm.pop <- draws.de.lstm %>% filter(Level %in% 'Population ')

```

```

draws.de.lstm.pop <- draws.de.lstm.pop %>%
  pivot_wider(names_from = Condition, values_from = surprisal)

de.lstm.pop.diff <- draws.de.lstm.pop %>%
  mutate(diff_ACC = PatientACC - AgentACC) %>%
  mutate(diff_DAT = PatientDAT - AgentDAT) %>%
  select(.draw, Level, diff_ACC, diff_DAT)

draws.de.lstm.ext <- de.lstm.pop.diff %>%
  select(diff_DAT, diff_ACC, Level, .draw) %>%
  pivot_longer(!c('Level', '.draw'), names_to = 'Condition',
               values_to = 'delta_surprisal')

saveRDS(draws.de.lstm.ext, '../temp_data/post_samples_de_lstm_ext.rds')
}

if (!file.exists('../temp_data/post_samples_de_tr_orig.rds')){
draws.de.tr <- model.de.tr.original %>%
  spread_draws(r_sent_id[sent_id,term], b_Intercept, b_verb.typedat,
               b_first.NPobject, `b_verb.typedat:first.NPobject`)

draws.de.tr <- draws.de.tr %>%
  mutate(AgentACC = b_Intercept,
         AgentDAT = b_Intercept + b_verb.typedat,
         PatientACC = b_Intercept + b_first.NPobject,
         PatientDAT = b_Intercept + b_verb.typedat + b_first.NPobject +
           `b_verb.typedat:first.NPobject`) %>%
  select(!starts_with('b')) %>%
  pivot_wider(names_from = c('sent', 'term'), values_from = r_sent) %>%
  select(!matches('.iteration|.chain'))

draws.de.tr <- draws.de.tr %>%
  pivot_longer(!.draw, values_to = 'surprisal', names_to = 'Condition') %>%
  mutate(Condition = ifelse(!grepl('_', Condition) ,
                           paste0('Population_', Condition ), Condition)) %>%
  separate(Condition, c('Level', 'Condition'), sep='_')

draws.de.tr.pop <- draws.de.tr %>% filter(Level %in% 'Population ')
draws.de.tr.randomlevel <- draws.de.tr %>% filter(!Level %in% 'Population ')

draws.de.tr.pop <- draws.de.tr.pop %>%
  pivot_wider(names_from = Condition, values_from = surprisal)

de.tr.pop.diff <- draws.de.tr.pop %>%
  mutate(diff_ACC = PatientACC - AgentACC) %>%
  mutate(diff_DAT = PatientDAT - AgentDAT) %>%
  select(.draw, Level, diff_ACC, diff_DAT)

#AgentDAT, AgentACC, PatientDAT, PatientACC

```



```

draws.de.tr.randomlevel <- draws.de.tr.randomlevel %>%
  group_by(.draw, Level) %>%
  mutate('PatientACC' = surprisal[Condition == 'Intercept'] +
          surprisal[Condition=='first.NPobject']) %>%
  mutate('PatienDAT' = surprisal[Condition == 'first.NPobject'] +
          surprisal[Condition == 'verb.typedat'] ) %>%
  mutate('AgentACC' = surprisal[Condition == 'Intercept']) %>%
  mutate('AgentDAT' = surprisal[Condition == 'Intercept'] +
          surprisal[Condition == 'verb.typedat']) %>%
  select(-Condition, -surprisal) %>%
  distinct()

de.tr.randomlevel.diff <- draws.de.tr.randomlevel %>%
  mutate(diff_DAT = PatienDAT - AgentDAT) %>%
  mutate(diff_ACC = PatientACC - AgentACC) %>%
  select(.draw, Level, diff_ACC, diff_DAT)

draws.de.tr.all <- rbind(de.tr.pop.diff, de.tr.randomlevel.diff)

draws.de.tr.all.long <- draws.de.tr.all %>%
  select(diff_DAT, diff_ACC, Level, .draw) %>%
  pivot_longer(!c('Level', '.draw'), names_to = 'Condition',
              values_to = 'delta_surprisal')

saveRDS(draws.de.tr.all.long, '../temp_data/post_samples_de_tr_orig.rds')
}

if (!file.exists('../temp_data/post_samples_de_tr_ext.rds')){
draws.de.tr <- model.de.tr.extended %>%
  spread_draws(r_sent_id[sent_id,term], b_Intercept,
              b_verb.typedat,b_first.NPobject, `b_verb.typedat:first.NPobject`)

draws.de.tr <- draws.de.tr %>%
  mutate(AgentACC = b_Intercept,
         AgentDAT = b_Intercept + b_verb.typedat,
         PatientACC = b_Intercept + b_first.NPobject,
         PatientDAT = b_Intercept + b_verb.typedat + b_first.NPobject +
           `b_verb.typedat:first.NPobject`) %>%
  select(!starts_with('b')) %>%
  pivot_wider(names_from = c('sent_id', 'term'), values_from = r_sent_id) %>%
  select(!matches('.iteration|.chain'))

draws.de.tr <- draws.de.tr %>%
  pivot_longer(!.draw, values_to = 'surprisal', names_to = 'Condition') %>%
  mutate(Condition = ifelse(!grepl('_', Condition),
                           paste0('Population_', Condition), Condition)) %>%
  separate(Condition, c('Level', 'Condition'), sep='_')

draws.de.tr.pop <- draws.de.tr %>% filter(Level %in% 'Population ')

```

```

draws.de.tr.pop <- draws.de.tr.pop %>%
  pivot_wider(names_from = Condition, values_from = surprisal)

de.tr.pop.diff <- draws.de.tr.pop %>%
  mutate(diff_ACC = PatientACC - AgentACC) %>%
  mutate(diff_DAT = PatientDAT - AgentDAT) %>%
  select(.draw, Level, diff_ACC, diff_DAT)

draws.de.tr.ext <- de.tr.pop.diff%>%
  select(diff_DAT, diff_ACC, Level, .draw) %>%
  pivot_longer(!c('Level', '.draw'), names_to = 'Condition',
              values_to = 'delta_surprisal')

saveRDS(draws.de.tr.ext, '../temp_data/post_samples_de_tr_ext.rds')
}

if (!file.exists('../temp_data/post_samples_de_gpt_orig.rds')) {
draws.de.gpt <- model.de.gpt.original %>%
  spread_draws(r_sent[sent,term], b_Intercept,
              b_verb.typedat,b_first.NPobject,
              `b_verb.typedat:first.NPobject`)

# calculate estimates of each condition level
draws.de.gpt <- draws.de.gpt %>%
  mutate(AgentACC = b_Intercept,
         AgentDAT = b_Intercept + b_verb.typedat,
         PatientACC = b_Intercept + b_first.NPobject,
         PatientDAT = b_Intercept + b_verb.typedat + b_first.NPobject +
           `b_verb.typedat:first.NPobject`) %>%
  select(!starts_with('b')) %>%
  pivot_wider(names_from = c('sent', 'term'), values_from = r_sent) %>%
  select(!matches('.iteration|.chain'))

draws.de.gpt <- draws.de.gpt %>%
  pivot_longer(!.draw, values_to = 'surprisal', names_to = 'Condition') %>%
  mutate(Condition = ifelse(!grepl('_', Condition) ,
                          paste0('Population_', Condition) , Condition)) %>%
  separate(Condition, c('Level', 'Condition'), sep='_')

draws.de.gpt.pop <- draws.de.gpt %>% filter(Level %in% 'Population ')
draws.de.gpt.randomlevel <- draws.de.gpt %>% filter(!Level %in% 'Population ')

draws.de.gpt.pop <- draws.de.gpt.pop %>%
  pivot_wider(names_from = Condition, values_from = surprisal)

de.gpt.pop.diff <- draws.de.gpt.pop %>%
  mutate(diff_ACC = PatientACC - AgentACC) %>%
  mutate(diff_DAT = PatientDAT - AgentDAT) %>%
  select(.draw, Level, diff_ACC, diff_DAT)

#AgentDAT, AgentACC, PatientDAT, PatientACC

```

```

draws.de.gpt.randomlevel <- draws.de.gpt.randomlevel %>%
  group_by(.draw, Level) %>%
  mutate('PatientACC' = surprisal[Condition == 'Intercept'] +
    surprisal[Condition=='first.NPobject']) %>%
  mutate('PatientDAT' = surprisal[Condition == 'first.NPobject'] +
    surprisal[Condition == 'verb.typedat'] ) %>%
  mutate('AgentACC' = surprisal[Condition == 'Intercept']) %>%
  mutate('AgentDAT' = surprisal[Condition == 'Intercept'] +
    surprisal[Condition == 'verb.typedat']) %>%
  select(-Condition, -surprisal) %>%
  distinct()

de.gpt.randomlevel.diff <- draws.de.gpt.randomlevel %>%
  mutate(diff_DAT = PatientDAT - AgentDAT) %>%
  mutate(diff_ACC = PatientACC - AgentACC) %>%
  select(.draw, Level, diff_ACC, diff_DAT)

draws.de.gpt.all <- rbind(de.gpt.pop.diff, de.gpt.randomlevel.diff)

draws.de.gpt.all.long <- draws.de.gpt.all %>%
  select(diff_DAT, diff_ACC, Level, .draw) %>%
  pivot_longer(!c('Level', '.draw'), names_to = 'Condition',
    values_to = 'delta_surprisal')

saveRDS(draws.de.gpt.all.long, '../temp_data/post_samples_de_gpt_orig.rds')
}

if (!file.exists('../temp_data/post_samples_de_gpt_ext.rds')) {
draws.de.gpt <- model.de.gpt.extended %>%
  spread_draws(r_sent_id[sent_id,term], b_Intercept,
    b_verb.typedat,b_first.NPobject, `b_verb.typedat:first.NPobject`)

draws.de.gpt <- draws.de.gpt %>%
  mutate(AgentACC = b_Intercept,
    AgentDAT = b_Intercept + b_verb.typedat,
    PatientACC = b_Intercept + b_first.NPobject,
    PatientDAT = b_Intercept + b_verb.typedat + b_first.NPobject +
      `b_verb.typedat:first.NPobject`) %>%
  select(!starts_with('b')) %>%
  pivot_wider(names_from = c('sent_id', 'term'), values_from = r_sent_id) %>%
  select(!matches('.iteration|.chain'))

draws.de.gpt <- draws.de.gpt %>%
  pivot_longer(!.draw, values_to = 'surprisal', names_to = 'Condition') %>%
  mutate(Condition = ifelse(!grepl('_', Condition),
    paste0('Population_', Condition ), Condition)) %>%

```

```

    separate(Condition, c('Level', 'Condition'), sep='_')

draws.de.gpt.pop <- draws.de.gpt %>% filter(Level %in% 'Population ')

draws.de.gpt.pop <- draws.de.gpt.pop %>%
  pivot_wider(names_from = Condition, values_from = surprisal)

de.gpt.pop.diff <- draws.de.gpt.pop %>%
  mutate(diff_ACC = PatientACC - AgentACC) %>%
  mutate(diff_DAT = PatientDAT - AgentDAT) %>%
  select(.draw, Level, diff_ACC, diff_DAT)

draws.de.gpt.ext <- de.gpt.pop.diff %>%
  select(diff_DAT, diff_ACC, Level, .draw) %>%
  pivot_longer(!c('Level', '.draw'), names_to = 'Condition',
              values_to = 'delta_surprisal')

saveRDS(draws.de.gpt.ext, '../temp_data/post_samples_de_gpt_ext.rds')
}

if (!file.exists("../temp_data/post_samples_hi_lstm_orig.rds")){

draws.hi.lstm <- model.hi.lstm.original %>%
  spread_draws(r_sent_id[sent_id,term], b_Intercept,
              b_ambiguityUNAMB, b_aspectPFV, `b_ambiguityUNAMB:aspectPFV`)

# calculate estimates of each condition level
draws.hi.lstm <- draws.hi.lstm %>%
  mutate(AmbIpfv = b_Intercept,
         UnambIpfv = b_Intercept + b_ambiguityUNAMB,
         AmbPfv = b_Intercept + b_aspectPFV,
         UnambPfv = b_Intercept + b_ambiguityUNAMB +
           b_aspectPFV + `b_ambiguityUNAMB:aspectPFV`) %>%
  select(!starts_with('b')) %>%
  pivot_wider(names_from = c('sent_id', 'term'), values_from = r_sent_id) %>%
  select(!matches('.iteration|.chain'))

draws.hi.lstm <- draws.hi.lstm %>%
  pivot_longer(!.draw, values_to = 'surprisal', names_to = 'Condition') %>%
  mutate(Condition = ifelse(!grepl('_', Condition) ,
                           paste0('Population_', Condition) , Condition)) %>%
  separate(Condition, c('Level', 'Condition'), sep='_')

draws.hi.lstm.pop <- draws.hi.lstm %>% filter(Level %in% 'Population ')
draws.hi.lstm.randomlevel <- draws.hi.lstm %>%
  filter(!Level %in% 'Population ')

draws.hi.lstm.pop <- draws.hi.lstm.pop %>%

```

```

pivot_wider(names_from = Condition, values_from = surprisal)

hi.lstm.pop.diff <- draws.hi.lstm.pop %>%
  mutate(diff_Pfv = AmbPfv - UnambPfv) %>%
  mutate(diff_Ipfv = AmbIpfv - UnambIpfv) %>%
  select(.draw, Level, diff_Pfv, diff_Ipfv)

#AgentDAT, AgentACC, PatientDAT, PatientACC

draws.hi.lstm.randomlevel <- draws.hi.lstm.randomlevel %>%
  group_by(.draw, Level) %>%
  mutate('UnambPfv' = surprisal[Condition == 'ambiguityUNAMB'] +
    surprisal[Condition=='aspectPFV']) %>%
  mutate('AmbPfv' = surprisal[Condition == 'aspectPFV'] +
    surprisal[Condition == 'Intercept']) %>%
  mutate('AmbIpfv' = surprisal[Condition == 'Intercept']) %>%
  mutate('UnambIpfv' = surprisal[Condition == 'Intercept'] +
    surprisal[Condition == 'ambiguityUNAMB']) %>%
  select(-Condition, -surprisal) %>%
  distinct()

hi.lstm.randomlevel.diff <- draws.hi.lstm.randomlevel %>%
  mutate(diff_Pfv = AmbPfv - UnambPfv) %>%
  mutate(diff_Ipfv = AmbIpfv - UnambIpfv) %>%
  select(.draw, Level, diff_Pfv, diff_Ipfv)

draws.hi.lstm.all <- rbind(hi.lstm.pop.diff, hi.lstm.randomlevel.diff)

draws.hi.lstm.all.long <- draws.hi.lstm.all %>%
  select(diff_Pfv, diff_Ipfv, Level, .draw) %>%
  pivot_longer(!c('Level', '.draw'), names_to = 'Condition',
    values_to = 'delta_surprisal')

saveRDS(draws.hi.lstm.all.long, '../temp_data/post_samples_hi_lstm_orig.rds')
}

if (!file.exists('../temp_data/post_samples_hi_lstm_ext.rds')){

draws.hi.lstm <- model.hi.lstm.extended %>%
  spread_draws(r_sent_id[sent_id,term], b_Intercept,
    b_ambiguityUNAMB, b_aspectPFV, `b_ambiguityUNAMB:aspectPFV`)

# calculate estimates of each condition level
draws.hi.lstm <- draws.hi.lstm %>%
  mutate(AmbIpfv = b_Intercept,
    UnambIpfv = b_Intercept + b_ambiguityUNAMB,
    AmbPfv = b_Intercept + b_aspectPFV,
    UnambPfv = b_Intercept + b_ambiguityUNAMB +
      b_aspectPFV + `b_ambiguityUNAMB:aspectPFV`) %>%

```

```

select(!starts_with('b')) %>%
pivot_wider(names_from = c('sent_id', 'term'), values_from = r_sent_id) %>%
select(!matches('.iteration|.chain'))

draws.hi.lstm <- draws.hi.lstm %>%
  pivot_longer(!.draw, values_to = 'surprisal', names_to = 'Condition') %>%
  mutate(Condition = ifelse(!grepl('_', Condition) ,
                           paste0('Population _', Condition) , Condition)) %>%
  separate(Condition, c('Level', 'Condition'), sep='_')

draws.hi.lstm.pop <- draws.hi.lstm %>% filter(Level %in% 'Population ')

draws.hi.lstm.pop <- draws.hi.lstm.pop %>%
  pivot_wider(names_from = Condition, values_from = surprisal)

hi.lstm.pop.diff <- draws.hi.lstm.pop %>%
  mutate(diff_Pfv = AmbPfv - UnambPfv) %>%
  mutate(diff_Ipfv = AmbIpfv - UnambIpfv) %>%
  select(.draw, Level, diff_Pfv, diff_Ipfv)

draws.hi.lstm.ext <- hi.lstm.pop.diff %>%
  select(diff_Pfv, diff_Ipfv, Level, .draw) %>%
  pivot_longer(!c('Level', '.draw'), names_to = 'Condition',
              values_to = 'delta_surprisal')

saveRDS(draws.hi.lstm.ext, '../temp_data/post_samples_hi_lstm_ext.rds')
}

if (!file.exists('../temp_data/post_samples_hi_bert_orig.rds')){
draws.hi.tr <- model.hi.bert.original %>%
  spread_draws(r_sent_id[sent_id,term], b_Intercept,
              b_ambiguityUNAMB, b_aspectPFV, `b_ambiguityUNAMB:aspectPFV`)

# calculate estimates of each condition level
draws.hi.tr <- draws.hi.tr %>%
  mutate(AmbIpfv = b_Intercept,
         UnambIpfv = b_Intercept + b_ambiguityUNAMB,
         AmbPfv = b_Intercept + b_aspectPFV,
         UnambPfv = b_Intercept + b_ambiguityUNAMB +
           b_aspectPFV + `b_ambiguityUNAMB:aspectPFV`) %>%
  select(!starts_with('b')) %>%
  pivot_wider(names_from = c('sent_id', 'term'), values_from = r_sent_id) %>%
  select(!matches('.iteration|.chain'))

draws.hi.tr <- draws.hi.tr %>%
  pivot_longer(!.draw, values_to = 'surprisal', names_to = 'Condition') %>%
  mutate(Condition = ifelse(!grepl('_', Condition) ,
                           paste0('Population _', Condition) , Condition)) %>%
  separate(Condition, c('Level', 'Condition'), sep='_')

draws.hi.tr.pop <- draws.hi.tr %>% filter(Level %in% 'Population ')

```

```

draws.hi.tr.randomlevel <- draws.hi.tr %>% filter(!Level %in% 'Population ')

draws.hi.tr.pop <- draws.hi.tr.pop %>%
  pivot_wider(names_from = Condition, values_from = surprisal)

hi.tr.pop.diff <- draws.hi.tr.pop %>%
  mutate(diff_Pfv = AmbPfv - UnambPfv) %>%
  mutate(diff_Ipfv = AmbIpfv - UnambIpfv) %>%
  select(.draw, Level, diff_Pfv, diff_Ipfv)

#AgentDAT, AgentACC, PatientDAT, PatientACC

draws.hi.tr.randomlevel <- draws.hi.tr.randomlevel %>%
  group_by(.draw, Level) %>%
  mutate('UnambPfv' = surprisal[Condition == 'ambiguityUNAMB'] +
    surprisal[Condition=='aspectPFV']) %>%
  mutate('AmbPfv' = surprisal[Condition == 'aspectPFV'] +
    surprisal[Condition == 'Intercept'] ) %>%
  mutate('AmbIpfv' = surprisal[Condition == 'Intercept']) %>%
  mutate('UnambIpfv' = surprisal[Condition == 'Intercept'] +
    surprisal[Condition == 'ambiguityUNAMB']) %>%
  select(-Condition, -surprisal) %>%
  distinct()

hi.tr.randomlevel.diff <- draws.hi.tr.randomlevel %>%
  mutate(diff_Pfv = AmbPfv - UnambPfv) %>%
  mutate(diff_Ipfv = AmbIpfv - UnambIpfv) %>%
  select(.draw, Level, diff_Pfv, diff_Ipfv)

draws.hi.tr.all <- rbind(hi.tr.pop.diff, hi.tr.randomlevel.diff)

draws.hi.tr.all.long <- draws.hi.tr.all %>%
  select(diff_Pfv, diff_Ipfv, Level, .draw) %>%
  pivot_longer(!c('Level', '.draw'), names_to = 'Condition',
    values_to = 'delta_surprisal')

saveRDS(draws.hi.tr.all.long, '../temp_data/post_samples_hi_bert_orig.rds')
}

if (!file.exists('../temp_data/post_samples_hi_tr_ext.rds')){
  draws.hi.tr <- model.hi.bert.extended %>%
    spread_draws(r_sent_id[sent_id,term], b_Intercept, b_ambiguityUNAMB,
      b_aspectPFV, `b_ambiguityUNAMB:aspectPFV`)

  # calculate estimates of each condition level
  draws.hi.tr <- draws.hi.tr %>%
    mutate(AmbIpfv = b_Intercept,
      UnambIpfv = b_Intercept + b_ambiguityUNAMB,
      AmbPfv = b_Intercept + b_aspectPFV,
      UnambPfv = b_Intercept + b_ambiguityUNAMB + b_aspectPFV +

```

```

      `b_ambiguityUNAMB:aspectPFV`) %>%
select(!starts_with('b')) %>%
pivot_wider(names_from = c('sent_id', 'term'), values_from = r_sent_id) %>%
select(!matches('.iteration|.chain'))

draws.hi.tr <- draws.hi.tr %>%
  pivot_longer(!.draw, values_to = 'surprisal', names_to = 'Condition') %>%
  mutate(Condition = ifelse(!grepl('_', Condition) ,
                           paste0('Population_', Condition) , Condition)) %>%
  separate(Condition, c('Level', 'Condition'), sep='_')

draws.hi.tr.pop <- draws.hi.tr %>% filter(Level %in% 'Population ')

draws.hi.tr.pop <- draws.hi.tr.pop %>%
  pivot_wider(names_from = Condition, values_from = surprisal)

hi.tr.pop.diff <- draws.hi.tr.pop %>%
  mutate(diff_Pfv = AmbPfv - UnambPfv) %>%
  mutate(diff_Ipfv = AmbIpfv - UnambIpfv) %>%
  select(.draw, Level, diff_Pfv, diff_Ipfv)

draws.hi.tr.ext <- hi.tr.pop.diff %>%
  select(diff_Pfv, diff_Ipfv, Level, .draw) %>%
  pivot_longer(!c('Level', '.draw'),
              names_to = 'Condition', values_to = 'delta_surprisal')

saveRDS(draws.hi.tr.ext, '../temp_data/post_samples_hi_tr_ext.rds')
}

if (!file.exists('../temp_data/post_samples_hi_gpt_orig.rds')){

draws.hi.gpt <- model.hi.gpt.original %>%
  spread_draws(r_sent_id[sent_id,term], b_Intercept,
              b_ambiguityUNAMB, b_aspectPFV, `b_ambiguityUNAMB:aspectPFV`)

# calculate estimates of each condition level
draws.hi.gpt <- draws.hi.gpt %>%
  mutate(AmbIpfv = b_Intercept,
         UnambIpfv = b_Intercept + b_ambiguityUNAMB,
         AmbPfv = b_Intercept + b_aspectPFV,
         UnambPfv = b_Intercept + b_ambiguityUNAMB + b_aspectPFV +
           `b_ambiguityUNAMB:aspectPFV`) %>%
  select(!starts_with('b')) %>%
  pivot_wider(names_from = c('sent_id', 'term'), values_from = r_sent_id) %>%
  select(!matches('.iteration|.chain'))

draws.hi.gpt <- draws.hi.gpt %>%
  pivot_longer(!.draw, values_to = 'surprisal', names_to = 'Condition') %>%
  mutate(Condition = ifelse(!grepl('_', Condition) ,
                           paste0('Population_', Condition) , Condition)) %>%
  separate(Condition, c('Level', 'Condition'), sep='_')
}

```



```

draws.hi.gpt.pop <- draws.hi.gpt %>% filter(Level %in% 'Population ')
draws.hi.gpt.randomlevel <- draws.hi.gpt %>% filter(!Level %in% 'Population ')

draws.hi.gpt.pop <- draws.hi.gpt.pop %>%
  pivot_wider(names_from = Condition, values_from = surprisal)

hi.gpt.pop.diff <- draws.hi.gpt.pop %>%
  mutate(diff_Pfv = AmbPfv - UnambPfv) %>%
  mutate(diff_Ipfv = AmbIpfv - UnambIpfv) %>%
  select(.draw, Level, diff_Pfv, diff_Ipfv)

#AgentDAT, AgentACC, PatientDAT, PatientACC

draws.hi.gpt.randomlevel <- draws.hi.gpt.randomlevel %>%
  group_by(.draw, Level) %>%
  mutate('UnambPfv' = surprisal[Condition == 'ambiguityUNAMB'] +
    surprisal[Condition=='aspectPFV']) %>%
  mutate('AmbPfv' = surprisal[Condition == 'aspectPFV'] +
    surprisal[Condition == 'Intercept'] ) %>%
  mutate('AmbIpfv' = surprisal[Condition == 'Intercept']) %>%
  mutate('UnambIpfv' = surprisal[Condition == 'Intercept'] +
    surprisal[Condition == 'ambiguityUNAMB']) %>%
  select(-Condition, -surprisal) %>%
  distinct()

hi.gpt.randomlevel.diff <- draws.hi.gpt.randomlevel %>%
  mutate(diff_Pfv = AmbPfv - UnambPfv) %>%
  mutate(diff_Ipfv = AmbIpfv - UnambIpfv) %>%
  select(.draw, Level, diff_Pfv, diff_Ipfv)

draws.hi.gpt.all <- rbind(hi.gpt.pop.diff, hi.gpt.randomlevel.diff)

draws.hi.gpt.all.long <- draws.hi.gpt.all %>%
  select(diff_Pfv, diff_Ipfv, Level, .draw) %>%
  pivot_longer(!c('Level', '.draw'), names_to = 'Condition',
    values_to = 'delta_surprisal')

saveRDS(draws.hi.gpt.all.long, '../temp_data/post_samples_hi_gpt_orig.rds')
}

if (!file.exists('../temp_data/post_samples_hi_gpt_ext.rds')){
draws.hi.gpt <- model.hi.gpt.extended %>%
  spread_draws(r_sent_id[sent_id,term], b_Intercept, b_ambiguityUNAMB,
    b_aspectPFV, `b_ambiguityUNAMB:aspectPFV`)

# calculate estimates of each condition level
draws.hi.gpt <- draws.hi.gpt %>%
  mutate(AmbIpfv = b_Intercept, UnambIpfv = b_Intercept + b_ambiguityUNAMB,
    AmbPfv = b_Intercept + b_aspectPFV,
    UnambPfv = b_Intercept + b_ambiguityUNAMB + b_aspectPFV +

```

```

        `b_ambiguityUNAMB:aspectPFV`) %>%
select(!starts_with('b')) %>%
pivot_wider(names_from = c('sent_id', 'term'), values_from = r_sent_id) %>%
select(!matches('.iteration|.chain'))

draws.hi.gpt <- draws.hi.gpt %>%
  pivot_longer(!.draw, values_to = 'surprisal', names_to = 'Condition') %>%
  mutate(Condition = ifelse(!grepl('_', Condition) ,
                           paste0('Population_', Condition) , Condition)) %>%
  separate(Condition, c('Level', 'Condition'), sep='_')

draws.hi.gpt.pop <- draws.hi.gpt %>% filter(Level %in% 'Population ')

draws.hi.gpt.pop <- draws.hi.gpt.pop %>%
  pivot_wider(names_from = Condition, values_from = surprisal)

hi.gpt.pop.diff <- draws.hi.gpt.pop %>%
  mutate(diff_Pfv = AmbPfv - UnambPfv) %>%
  mutate(diff_Ipfv = AmbIpfv - UnambIpfv) %>%
  select(.draw, Level, diff_Pfv, diff_Ipfv)

hi.gpt.pop.ext <- hi.gpt.pop.diff %>%
  select(diff_Pfv, diff_Ipfv, Level, .draw) %>%
  pivot_longer(!c('Level', '.draw'), names_to = 'Condition',
              values_to = 'delta_surprisal')

saveRDS(hi.gpt.pop.ext, '../temp_data/post_samples_hi_gpt_ext.rds')
}

if (!file.exists("../temp_data/post_samples_eu_lstm_orig.rds")){

draws.eu.lstm <- model.basque.lstm.original %>%
  spread_draws(r_sent_id[sent_id,term], b_Intercept, b_Semantic.RoleErg,
              b_AmbiguityUnamb, `b_Semantic.RoleErg:AmbiguityUnamb`)

# calculate estimates of each condition level
draws.eu.lstm <- draws.eu.lstm %>%
  mutate(AmbAbs = b_Intercept,
         AmbErg = b_Intercept + b_Semantic.RoleErg,
         UnambAbs = b_Intercept + b_AmbiguityUnamb,
         UnambErg = b_Intercept + b_Semantic.RoleErg +
                   b_AmbiguityUnamb + `b_Semantic.RoleErg:AmbiguityUnamb`) %>%
  select(!starts_with('b')) %>%
  pivot_wider(names_from = c('sent_id', 'term'), values_from = r_sent_id) %>%
  select(!matches('.iteration|.chain'))

draws.eu.lstm <- draws.eu.lstm %>%
  pivot_longer(!.draw, values_to = 'surprisal', names_to = 'Condition') %>%
  mutate(Condition = ifelse(!grepl('_', Condition) ,
                           paste0('Population_', Condition) , Condition)) %>%
  separate(Condition, c('Level', 'Condition'), sep='_')
}

```

```

draws.eu.lstm.pop <- draws.eu.lstm %>% filter(Level %in% 'Population ')
draws.eu.lstm.randomlevel <- draws.eu.lstm %>%
  filter(!Level %in% 'Population ')

draws.eu.lstm.pop <- draws.eu.lstm.pop %>%
  pivot_wider(names_from = Condition, values_from = surprisal)

eu.lstm.pop.diff <- draws.eu.lstm.pop %>%
  mutate(diff_Amb = AmbAbs - AmbErg) %>%
  mutate(diff_Unamb = UnambAbs - UnambErg) %>%
  select(.draw, Level, diff_Amb, diff_Unamb)

#AgentDAT, AgentACC, PatientDAT, PatientACC

draws.eu.lstm.randomlevel <- draws.eu.lstm.randomlevel %>%
  group_by(.draw, Level) %>%
  mutate('AmbErg' = surprisal[Condition == 'Intercept'] +
    surprisal[Condition=='Semantic.RoleErg']) %>%
  mutate('UnambAbs' = surprisal[Condition == 'AmbiguityUnamb'] +
    surprisal[Condition == 'Intercept'] ) %>%
  mutate('AmbAbs' = surprisal[Condition == 'Intercept']) %>%
  mutate('UnambErg' = surprisal[Condition == 'AmbiguityUnamb'] +
    surprisal[Condition == 'Semantic.RoleErg']) %>%
  select(-Condition, -surprisal) %>%
  distinct()

eu.lstm.randomlevel.diff <- draws.eu.lstm.randomlevel %>%
  mutate(diff_Amb = AmbAbs - AmbErg) %>%
  mutate(diff_Unamb = UnambAbs - UnambErg) %>%
  select(.draw, Level, diff_Amb, diff_Unamb)

draws.eu.lstm.all <- rbind(eu.lstm.pop.diff, eu.lstm.randomlevel.diff)

draws.eu.lstm.all.long <- draws.eu.lstm.all %>%
  select(diff_Amb, diff_Unamb, Level, .draw) %>%
  pivot_longer(!c('Level', '.draw'), names_to = 'Condition',
    values_to = 'delta_surprisal')

saveRDS(draws.eu.lstm.all.long,
  '../temp_data/post_samples_eu_lstm_orig.rds')
}

if (!file.exists('../temp_data/post_samples_eu_lstm_ext.rds')){
draws.eu.lstm.extended <- model.basque.lstm.extended %>%
  spread_draws(r_sent_id[sent_id,term], b_Intercept,
    b_Semantic.RoleErg, b_AmbiguityUnamb,
    `b_Semantic.RoleErg:AmbiguityUnamb`)
}

```

```

# calculate estimates of each condition level
draws.eu.lstm.extended <- draws.eu.lstm.extended %>%
  mutate(AmbAbs = b_Intercept, AmbErg = b_Intercept + b_Semantic.RoleErg,
         UnambAbs = b_Intercept + b_AmbiguityUnamb,
         UnambErg = b_Intercept + b_Semantic.RoleErg + b_AmbiguityUnamb +
           `b_Semantic.RoleErg:AmbiguityUnamb`) %>%
  select(!starts_with('b')) %>%
  pivot_wider(names_from = c('sent_id', 'term'), values_from = r_sent_id) %>%
  select(!matches('.iteration|.chain'))

draws.eu.lstm.extended <- draws.eu.lstm.extended %>%
  pivot_longer(!.draw, values_to = 'surprisal', names_to = 'Condition') %>%
  mutate(Condition = ifelse(!grepl('_', Condition) ,
                          paste0('Population_', Condition) , Condition)) %>%
  separate(Condition, c('Level', 'Condition'), sep='_')

draws.eu.lstm.extended.pop <- draws.eu.lstm.extended %>%
  filter(Level %in% 'Population ')

draws.eu.lstm.extended.pop <- draws.eu.lstm.extended.pop %>%
  pivot_wider(names_from = Condition, values_from = surprisal)

draws.eu.lstm.extended.pop.diff <- draws.eu.lstm.extended.pop %>%
  mutate(diff_Amb = AmbAbs - AmbErg) %>%
  mutate(diff_Unamb = UnambAbs - UnambErg) %>%
  select(.draw, Level, diff_Amb, diff_Unamb)

draws.eu.lstm.extended.long <- draws.eu.lstm.extended.pop.diff %>%
  select(diff_Amb, diff_Unamb, Level, .draw) %>%
  pivot_longer(!c('Level', '.draw'),
              names_to = 'Condition', values_to = 'delta_surprisal')
saveRDS(draws.eu.lstm.extended.long, '../temp_data/post_samples_eu_lstm_ext.rds')
}
if (!file.exists('../temp_data/post_samples_eu_tr_orig.rds')){
draws.eu.tr <- model.basque.tr.original %>%
  spread_draws(r_sent_id[sent_id,term], b_Intercept,
              b_Semantic.RoleErg, b_AmbiguityUnamb,
              `b_Semantic.RoleErg:AmbiguityUnamb`)

# calculate estimates of each condition level
draws.eu.tr <- draws.eu.tr %>%
  mutate(AmbAbs = b_Intercept,
         AmbErg = b_Intercept + b_Semantic.RoleErg,
         UnambAbs = b_Intercept + b_AmbiguityUnamb,
         UnambErg = b_Intercept + b_Semantic.RoleErg +
           b_AmbiguityUnamb + `b_Semantic.RoleErg:AmbiguityUnamb`) %>%
  select(!starts_with('b')) %>%
  pivot_wider(names_from = c('sent_id', 'term'), values_from = r_sent_id) %>%
  select(!matches('.iteration|.chain'))

draws.eu.tr <- draws.eu.tr %>%
  pivot_longer(!.draw, values_to = 'surprisal', names_to = 'Condition') %>%
  mutate(Condition = ifelse(!grepl('_', Condition) ,

```

```

        paste0('Population_', Condition ), Condition)) %>%
    separate(Condition, c('Level', 'Condition'), sep='_')

draws.eu.tr.pop <- draws.eu.tr %>% filter(Level %in% 'Population ')
draws.eu.tr.randomlevel <- draws.eu.tr %>% filter(!Level %in% 'Population ')

draws.eu.tr.pop <- draws.eu.tr.pop %>%
  pivot_wider(names_from = Condition, values_from = surprisal)

eu.tr.pop.diff <- draws.eu.tr.pop %>%
  mutate(diff_Amb = AmbAbs - AmbErg) %>%
  mutate(diff_Unamb = UnambAbs - UnambErg) %>%
  select(.draw, Level, diff_Amb, diff_Unamb)

#AgentDAT, AgentACC, PatientDAT, PatientACC

draws.eu.tr.randomlevel <- draws.eu.tr.randomlevel %>%
  group_by(.draw, Level) %>%
  mutate('AmbErg' = surprisal[Condition == 'Intercept'] +
    surprisal[Condition=='Semantic.RoleErg']) %>%
  mutate('UnambAbs' = surprisal[Condition == 'AmbiguityUnamb'] +
    surprisal[Condition == 'Intercept'] ) %>%
  mutate('AmbAbs' = surprisal[Condition == 'Intercept']) %>%
  mutate('UnambErg' = surprisal[Condition == 'AmbiguityUnamb'] +
    surprisal[Condition == 'Semantic.RoleErg']) %>%
  select(-Condition, -surprisal) %>%
  distinct()

eu.tr.randomlevel.diff <- draws.eu.tr.randomlevel %>%
  mutate(diff_Amb = AmbAbs - AmbErg) %>%
  mutate(diff_Unamb = UnambAbs - UnambErg) %>%
  select(.draw, Level, diff_Amb, diff_Unamb)

draws.eu.tr.all <- rbind(eu.tr.pop.diff, eu.tr.randomlevel.diff)

draws.eu.tr.all.long <- draws.eu.tr.all %>%
  select(diff_Amb, diff_Unamb, Level, .draw) %>%
  pivot_longer(!c('Level', '.draw'),
    names_to = 'Condition', values_to = 'delta_surprisal')
saveRDS(draws.eu.tr.all.long, '../temp_data/post_samples_eu_tr_orig.rds')
}

if (!file.exists('../temp_data/post_samples_eu_tr_ext.rds')){

draws.eu.tr.ext <- model.basque.tr.extended %>%
  spread_draws(r_sent_id[sent_id,term], b_Intercept, b_Semantic.RoleErg,
    b_AmbiguityUnamb, `b_Semantic.RoleErg:AmbiguityUnamb`)
# calculate estimates of each condition level
draws.eu.tr.ext <- draws.eu.tr.ext %>%
  mutate(AmbAbs = b_Intercept,

```

```

    AmbErg = b_Intercept + b_Semantic.RoleErg,
    UnambAbs = b_Intercept + b_AmbiguityUnamb,
    UnambErg = b_Intercept + b_Semantic.RoleErg +
      b_AmbiguityUnamb + `b_Semantic.RoleErg:AmbiguityUnamb`) %>%
  select(!starts_with('b')) %>%
  pivot_wider(names_from = c('sent_id', 'term'), values_from = r_sent_id) %>%
  select(!matches('.iteration|.chain'))

draws.eu.tr.ext <- draws.eu.tr.ext %>%
  pivot_longer(!.draw, values_to = 'surprisal', names_to = 'Condition') %>%
  mutate(Condition = ifelse(!grepl('_', Condition) ,
    paste0('Population_', Condition) , Condition)) %>%
  separate(Condition, c('Level', 'Condition'), sep='_')

draws.eu.tr.ext.pop <- draws.eu.tr.ext %>% filter(Level %in% 'Population ')

draws.eu.tr.ext.pop <- draws.eu.tr.ext.pop %>%
  pivot_wider(names_from = Condition, values_from = surprisal)

draws.eu.tr.ext.diff<- draws.eu.tr.ext.pop %>%
  mutate(diff_Amb = AmbAbs - AmbErg) %>%
  mutate(diff_Unamb = UnambAbs - UnambErg) %>%
  select(.draw, Level, diff_Amb, diff_Unamb)

draws.eu.tr.ext.long <- draws.eu.tr.ext.diff%>%
  select(diff_Amb, diff_Unamb, Level, .draw) %>%
  pivot_longer(!c('Level', '.draw'),
    names_to = 'Condition', values_to = 'delta_surprisal')

saveRDS(draws.eu.tr.ext.long, '../temp_data/post_samples_eu_tr_ext.rds')
}

if (!file.exists('../temp_data/post_samples_eu_gpt_orig.rds')){
  draws.eu.gpt <- model.basque.gpt.original %>%
    spread_draws(r_sent_id[sent_id,term], b_Intercept, b_Semantic.RoleErg,
      b_AmbiguityUnamb, `b_Semantic.RoleErg:AmbiguityUnamb`)

  # calculate estimates of each condition level
  draws.eu.gpt <- draws.eu.gpt %>%
    mutate(AmbAbs = b_Intercept,
      AmbErg = b_Intercept + b_Semantic.RoleErg,
      UnambAbs = b_Intercept + b_AmbiguityUnamb,
      UnambErg = b_Intercept + b_Semantic.RoleErg +
        b_AmbiguityUnamb + `b_Semantic.RoleErg:AmbiguityUnamb`) %>%
    select(!starts_with('b')) %>%
    pivot_wider(names_from = c('sent_id', 'term'), values_from = r_sent_id) %>%
    select(!matches('.iteration|.chain'))

  draws.eu.gpt <- draws.eu.gpt %>%
    pivot_longer(!.draw, values_to = 'surprisal', names_to = 'Condition') %>%
    mutate(Condition = ifelse(!grepl('_', Condition) ,
      paste0('Population_', Condition) , Condition)) %>%
    separate(Condition, c('Level', 'Condition'), sep='_')
}

```

```

draws.eu.gpt.pop <- draws.eu.gpt %>% filter(Level %in% 'Population ')
draws.eu.gpt.randomlevel <- draws.eu.gpt %>% filter(!Level %in% 'Population ')

draws.eu.gpt.pop <- draws.eu.gpt.pop %>%
  pivot_wider(names_from = Condition, values_from = surprisal)

eu.gpt.pop.diff <- draws.eu.gpt.pop %>%
  mutate(diff_Amb = AmbAbs - AmbErg) %>%
  mutate(diff_Unamb = UnambAbs - UnambErg) %>%
  select(.draw, Level, diff_Amb, diff_Unamb)

#AgentDAT, AgentACC, PatientDAT, PatientACC

draws.eu.gpt.randomlevel <- draws.eu.gpt.randomlevel %>%
  group_by(.draw, Level) %>%
  mutate('AmbErg' = surprisal[Condition == 'Intercept'] +
    surprisal[Condition=='Semantic.RoleErg']) %>%
  mutate('UnambAbs' = surprisal[Condition == 'AmbiguityUnamb'] +
    surprisal[Condition == 'Intercept'] ) %>%
  mutate('AmbAbs' = surprisal[Condition == 'Intercept']) %>%
  mutate('UnambErg' = surprisal[Condition == 'AmbiguityUnamb'] +
    surprisal[Condition == 'Semantic.RoleErg']) %>%
  select(-Condition, -surprisal) %>%
  distinct()

eu.gpt.randomlevel.diff <- draws.eu.gpt.randomlevel %>%
  mutate(diff_Amb = AmbAbs - AmbErg) %>%
  mutate(diff_Unamb = UnambAbs - UnambErg) %>%
  select(.draw, Level, diff_Amb, diff_Unamb)

draws.eu.gpt.all <- rbind(eu.gpt.pop.diff, eu.gpt.randomlevel.diff)

draws.eu.gpt.all.long <- draws.eu.gpt.all %>%
  select(diff_Amb, diff_Unamb, Level, .draw) %>%
  pivot_longer(!c('Level', '.draw'),
    names_to = 'Condition', values_to = 'delta_surprisal')
saveRDS(draws.eu.gpt.all.long, '../temp_data/post_samples_eu_gpt_orig.rds')
}

if (!file.exists('../temp_data/post_samples_eu_gpt_ext.rds')){

draws.eu.gpt.ext <- model.basque.gpt.extended %>%
  spread_draws(r_sent_id[sent_id,term], b_Intercept, b_Semantic.RoleErg,
    b_AmbiguityUnamb, `b_Semantic.RoleErg:AmbiguityUnamb`)
# calculate estimates of each condition level
draws.eu.gpt.ext <- draws.eu.gpt.ext %>%
  mutate(AmbAbs = b_Intercept,
    AmbErg = b_Intercept + b_Semantic.RoleErg,
    UnambAbs = b_Intercept + b_AmbiguityUnamb,
    UnambErg = b_Intercept + b_Semantic.RoleErg +

```

```

      b_AmbiguityUnamb + `b_Semantic.RoleErg:AmbiguityUnamb`) %>%
select(!starts_with('b')) %>%
pivot_wider(names_from = c('sent_id', 'term'), values_from = r_sent_id) %>%
select(!matches('.iteration|.chain'))

draws.eu.gpt.ext <- draws.eu.gpt.ext %>%
  pivot_longer(!.draw, values_to = 'surprisal', names_to = 'Condition') %>%
  mutate(Condition = ifelse(!grepl('_', Condition) ,
                           paste0('Population_', Condition) , Condition)) %>%
  separate(Condition, c('Level', 'Condition'), sep='_')

draws.eu.gpt.ext.pop <- draws.eu.gpt.ext %>% filter(Level %in% 'Population ')

draws.eu.gpt.ext.pop <- draws.eu.gpt.ext.pop %>%
  pivot_wider(names_from = Condition, values_from = surprisal)

draws.eu.gpt.ext.diff<- draws.eu.gpt.ext.pop %>%
  mutate(diff_Amb = AmbAbs - AmbErg) %>%
  mutate(diff_Unamb = UnambAbs - UnambErg) %>%
  select(.draw, Level, diff_Amb, diff_Unamb)

draws.eu.gpt.ext.long <- draws.eu.gpt.ext.diff %>%
  select(diff_Amb, diff_Unamb, Level, .draw) %>%
  pivot_longer(!c('Level', '.draw'), names_to = 'Condition',
              values_to = 'delta_surprisal')

saveRDS(draws.eu.gpt.ext.long , '../temp_data/post_samples_eu_gpt_ext.rds')
}

```

```

cis.orig.de <- rbind(draws.de.lstm.orig %>%
  filter(Level%in% 'Population ') %>%
  filter(Condition %in% 'diff_ACC') %>%
  bayestestR::ci(ci=0.89, method='HDI') %>%
  as.data.frame() %>% mutate(Model = 'LSTM') %>%
  mutate(Condition = 'Accusative') %>%
  filter(!Parameter %in% '.draw'),
draws.de.lstm.orig %>%
  filter(Level%in% 'Population ') %>%
  filter(Condition %in% 'diff_DAT') %>%
  bayestestR::ci(ci=0.89, method='HDI') %>%
  as.data.frame() %>% mutate(Model = 'LSTM') %>%
  mutate(Condition = 'Dative') %>%
  filter(!Parameter %in% '.draw'),
draws.de.tr.orig %>%
  filter(Level%in% 'Population ') %>%
  filter(Condition %in% 'diff_ACC') %>%
  bayestestR::ci(ci=0.89, method='HDI') %>%
  as.data.frame() %>% mutate(Model = 'BERT') %>%
  mutate(Condition = 'Accusative') %>%
  filter(!Parameter %in% '.draw'),
draws.de.tr.orig %>%
  filter(Level%in% 'Population ') %>%
  filter(Condition %in% 'diff_DAT') %>%

```



```

        bayestestR::ci(ci=0.89, method='HDI') %>%
        as.data.frame() %>% mutate(Model = 'BERT') %>%
        mutate(Condition = 'Dative') %>%
        filter(!Parameter %in% '.draw' ),
draws.de.gpt.orig %>%
        filter(Level%in% 'Population ') %>%
        filter(Condition %in% 'diff_ACC') %>%
        bayestestR::ci(ci=0.89, method='HDI') %>%
        as.data.frame() %>% mutate(Model = 'GPT-2') %>%
        mutate(Condition = 'Accusative') %>%
        filter(!Parameter %in% '.draw' ),
draws.de.gpt.orig %>%
        filter(Level%in% 'Population ') %>%
        filter(Condition %in% 'diff_DAT') %>%
        bayestestR::ci(ci=0.89, method='HDI') %>%
        as.data.frame() %>% mutate(Model = 'GPT-2') %>%
        mutate(Condition = 'Dative') %>%
        filter(!Parameter %in% '.draw' )
) %>%
  select(CI_low, CI_high, Condition, Model)

means.orig.de <- rbind(
  draws.de.lstm.orig %>%
    filter(Level%in% 'Population ') %>%
    filter(Condition %in% 'diff_ACC') %>%
    summarise(Mean = mean(delta_surprisal)),
  draws.de.lstm.orig %>%
    filter(Level%in% 'Population ') %>%
    filter(Condition %in% 'diff_DAT') %>%
    summarise(Mean = mean(delta_surprisal)),
  draws.de.tr.orig %>%
    filter(Level%in% 'Population ') %>%
    filter(Condition %in% 'diff_ACC') %>%
    summarise(Mean = mean(delta_surprisal)),
  draws.de.tr.orig %>%
    filter(Level%in% 'Population ') %>%
    filter(Condition %in% 'diff_DAT') %>%
    summarise(Mean = mean(delta_surprisal)),
  draws.de.gpt.orig %>%
    filter(Level%in% 'Population ') %>%
    filter(Condition %in% 'diff_ACC') %>%
    summarise(Mean = mean(delta_surprisal)),
  draws.de.gpt.orig %>%
    filter(Level%in% 'Population ') %>%
    filter(Condition %in% 'diff_DAT') %>%
    summarise(Mean = mean(delta_surprisal)))

means.ci.orig.de <- cbind(cis.orig.de, means.orig.de)

col.order <- c('Model', 'Condition', 'Mean', 'CI_low', 'CI_high')

```

```
means.ci.orig.re.de <- means.ci.orig.de[,col.order]
```

Table S4: German: Means and 89% credibility intervals for original dataset

| Model | Condition  | Mean | CI_low | CI_high |
|-------|------------|------|--------|---------|
| LSTM  | Accusative | 0.3  | -0.39  | 1.1     |
| LSTM  | Dative     | 0.7  | -0.01  | 1.4     |
| BERT  | Accusative | 2.2  | 1.84   | 2.7     |
| BERT  | Dative     | 2.3  | 1.86   | 2.7     |
| GPT-2 | Accusative | 1.5  | 1.16   | 1.9     |
| GPT-2 | Dative     | 1.5  | 1.10   | 1.9     |

#### Extended Stimuli

Table S5: German: Means and 89% credibility intervals for extended dataset

| Model | Condition  | Mean | CI_low | CI_high |
|-------|------------|------|--------|---------|
| LSTM  | Accusative | 0.2  | -0.24  | 0.7     |
| LSTM  | Dative     | 0.2  | -0.25  | 0.7     |
| BERT  | Accusative | 2.0  | 1.57   | 2.4     |
| BERT  | Dative     | 0.9  | 0.45   | 1.3     |
| GPT-2 | Accusative | 2.1  | 1.70   | 2.5     |
| GPT-2 | Dative     | 1.3  | 0.91   | 1.7     |

Table S6: Hindi: Means and 89% credibility intervals for original dataset

| Model | Condition    | Mean | CI_low | CI_high |
|-------|--------------|------|--------|---------|
| LSTM  | imperfective | 0.3  | -0.11  | 0.7     |
| LSTM  | perfective   | 0.1  | -0.31  | 0.5     |
| BERT  | imperfective | 0.7  | 0.05   | 1.3     |
| BERT  | perfective   | 0.6  | -0.03  | 1.2     |
| GPT-2 | imperfective | 0.5  | 0.34   | 0.6     |
| GPT-2 | perfective   | 0.8  | 0.63   | 1.0     |

Table S7: Hindi: Means and 89% credibility intervals for extended dataset

| Model | Condition    | Mean | CI_low | CI_high |
|-------|--------------|------|--------|---------|
| LSTM  | imperfective | 0.3  | -0.21  | 0.7     |
| BERT  | perfective   | 0.3  | -0.19  | 0.8     |
| LSTM  | imperfective | 0.8  | 0.16   | 1.4     |
| LSTM  | BERT         | 0.9  | 0.24   | 1.6     |
| GPT-2 | imperfective | 0.5  | 0.34   | 0.7     |
| GPT-2 | perfective   | 0.8  | 0.63   | 1.0     |

Table S8: Basque: Means and 89 percent credibility intervals for original dataset

| Model   | Condition   | Mean | CI_low | CI_high |
|---------|-------------|------|--------|---------|
| LSTM    | ambiguous   | 0.4  | -0.02  | 0.7     |
| LSTM    | unambiguous | 0.2  | -0.22  | 0.5     |
| RoBERTa | ambiguous   | 0.0  | -0.53  | 0.5     |
| RoBERTa | unambiguous | 2.0  | 1.46   | 2.5     |
| GPT-2   | ambiguous   | 1.2  | 0.73   | 1.7     |
| GPT-2   | unambiguous | 1.1  | 0.62   | 1.6     |

Table S9: Basque: Means and 89 percent credibility intervals for extended dataset

| Model   | Condition | Mean | CI_low | CI_high |
|---------|-----------|------|--------|---------|
| LSTM    | Amb_A     | 0.5  | 0.23   | 0.7     |
| LSTM    | Amb_P     | 0.3  | 0.04   | 0.5     |
| RoBERTa | Amb_A     | 0.0  | -0.53  | 0.5     |
| LSTM    | Amb_P     | 2.0  | 1.46   | 2.5     |
| GPT-2   | Amb_A     | 0.8  | 0.27   | 1.4     |
| GPT-2   | Amb_P     | 0.7  | 0.13   | 1.3     |

## S3.4 Plots

```
plot.de.lstm.ext <- draws.de.lstm.ext %>%
  filter(Level %in% 'Population ') %>%
  mutate(Condition =
    ifelse(Condition %in% 'diff_ACC', 'accusative', 'dative')) %>%
  ggplot(aes(x = delta_surprisal, y =
    Condition,color=Condition, fill= Condition)) +
  stat_slab(alpha = .5) +
  stat_pointinterval(position = position_dodge(width = .2, preserve = "single"),
    .width = c(.50,.80,.90)) +
  geom_vline(xintercept = 0, linetype="dashed") +
  scale_color_manual(values = c('accusative' = '#143548', 'dative' = '#AAC4D1')) +
  scale_fill_manual(values = c('accusative' = '#143548', 'dative' = '#AAC4D1')) +
  labs(y=NULL, x = element_blank()) +
  guides(fill="none", color="none") +
  theme(axis.text.y = element_blank(),
    #axis.text.x = element_blank(),
    panel.grid = element_blank(),
    panel.border = element_blank(),
    strip.text = element_text(size=10),
    axis.line.x = element_line(size = 0.5), axis.ticks.y = element_blank(),
    plot.background = element_rect(fill = "transparent", colour = NA),
    plot.title = element_text(size=22)) +
  labs(
    title = "German LSTM (extended dataset)"
  )

plot.de.tr.ext <- draws.de.tr.ext %>%
  filter(Level %in% 'Population ') %>%
  mutate(Condition = ifelse(Condition %in% 'diff_ACC', 'accusative', 'dative')) %>%
  ggplot(aes(x = delta_surprisal, y = Condition,color=Condition, fill= Condition)) +
  stat_slab(alpha = .5) +
  stat_pointinterval(position = position_dodge(width = .2, preserve = "single"),
    .width = c(.50,.80,.90)) +
  geom_vline(xintercept = 0, linetype="dashed") +
  scale_color_manual(values = c('accusative' = '#143548', 'dative' = '#AAC4D1')) +
  scale_fill_manual(values = c('accusative' = '#143548', 'dative' = '#AAC4D1')) +
  labs(y=NULL, x = element_blank()) +
  guides(fill="none", color="none") +
  theme(axis.text.y = element_blank(),
    #axis.text.x = element_blank(),
    panel.grid = element_blank(),
    panel.border = element_blank(),
    strip.text = element_text(size=10),
    axis.line.x = element_line(size = 0.5), axis.ticks.y = element_blank(),
    plot.background = element_rect(fill = "transparent", colour = NA),
    plot.title = element_text(size=22)) +
  labs(
    title = "German BERT (extended dataset)"
  )

plot.de.gpt.ext <- draws.de.gpt.ext %>%
```

```

filter(Level %in% 'Population ') %>%
mutate(Condition = ifelse(Condition %in% 'diff_ACC', 'accusative', 'dative')) %>%
ggplot(aes(x = delta_surprisal, y = Condition,color=Condition, fill= Condition)) +
stat_slab(alpha = .5) +
stat_pointinterval(position = position_dodge(width = .2, preserve = "single"),
                    .width = c(.50,.80,.90)) +
geom_vline(xintercept = 0, linetype="dashed") +
scale_color_manual(values = c('accusative' = '#143548', 'dative' = '#AAC4D1')) +
scale_fill_manual(values = c('accusative' = '#143548', 'dative' = '#AAC4D1')) +
labs(y=NULL, x = element_blank()) +
theme(axis.text.y = element_blank(),
       #axis.text.x = element_blank(),
       panel.grid = element_blank(),
       panel.border = element_blank(),
       strip.text = element_text(size=10),
       axis.line.x = element_line(size = 0.5), axis.ticks.y = element_blank(),
       plot.background = element_rect(fill = "transparent", colour = NA),
       plot.title = element_text(size=22),
       legend.key.size = unit(1, 'cm'), #change legend key size
       legend.key.height = unit(1, 'cm'), #change legend key height
       legend.key.width = unit(1, 'cm'), #change legend key width
       legend.text = element_text(size=20),
       legend.title = element_text(size=25))+

labs(
  title = "German GPT-2 (extended dataset)"
)

```

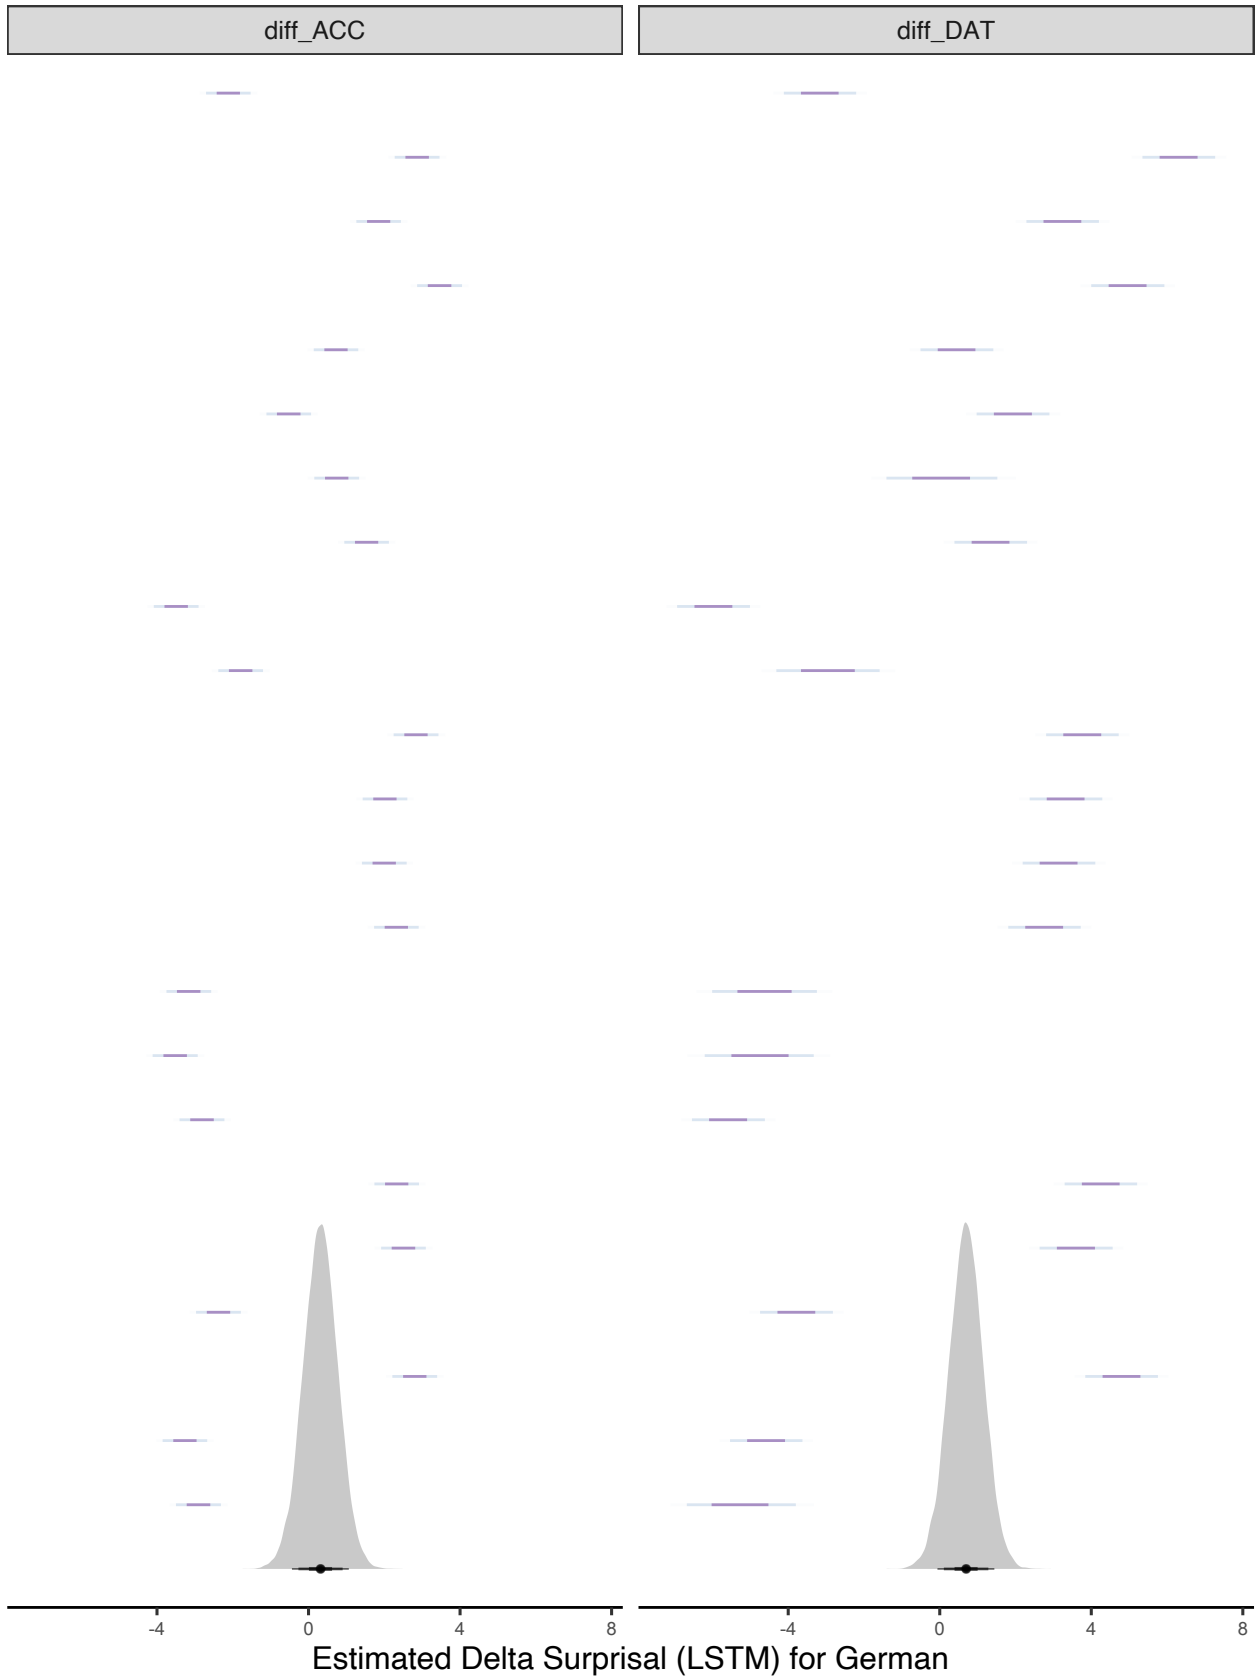

Figure S1: posterior distributions of the estimated surprisal difference between the critical conditions (agent-initial vs. patient-initial sentences), displayed for both conditions (accusative vs. dative). Surprisal is estimated by LSTMs and both population and group level estimates are displayed. LSTM and original dataset

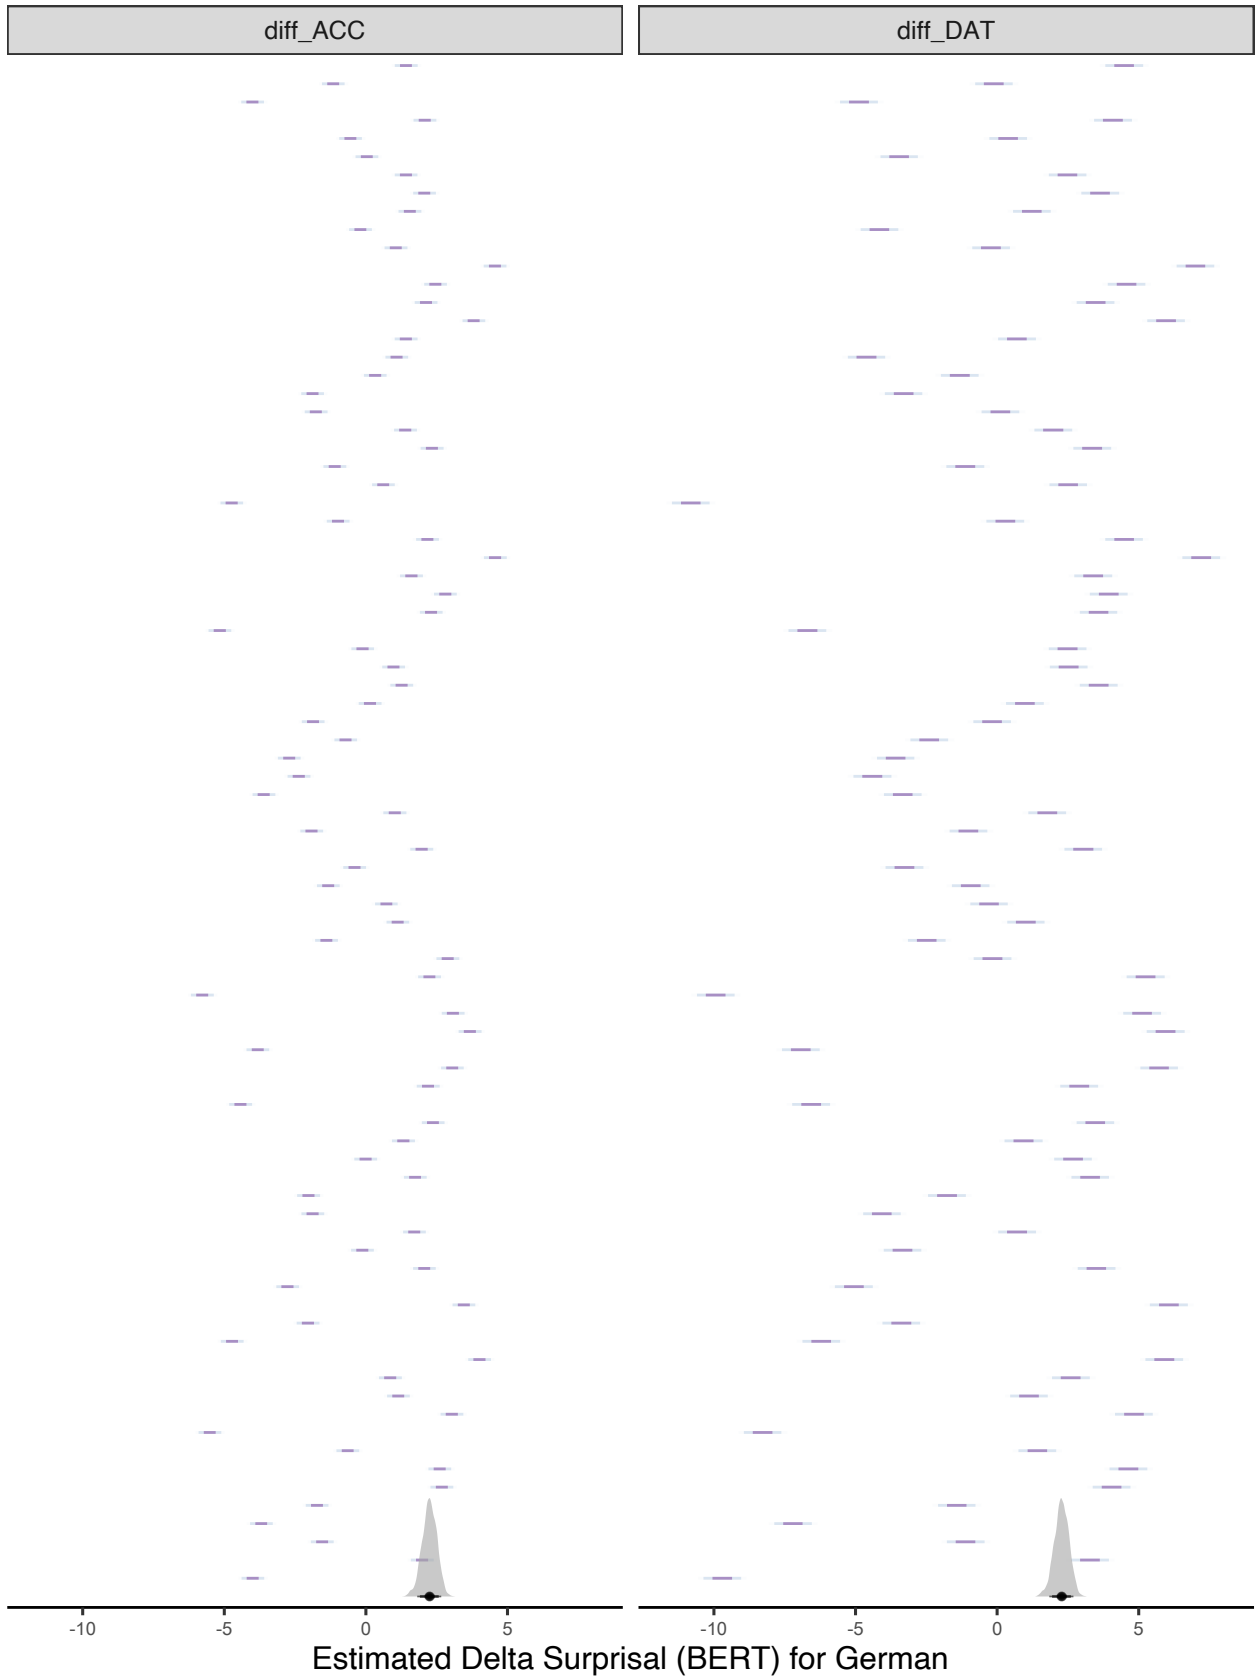

Figure S2: posterior distributions of the estimated surprisal difference between the critical conditions (agent-initial vs. patient-initial sentences), displayed for both conditions (accusative vs. dative). Surprisal is estimated by BERT and both population and group level estimates are displayed. LSTM and original dataset

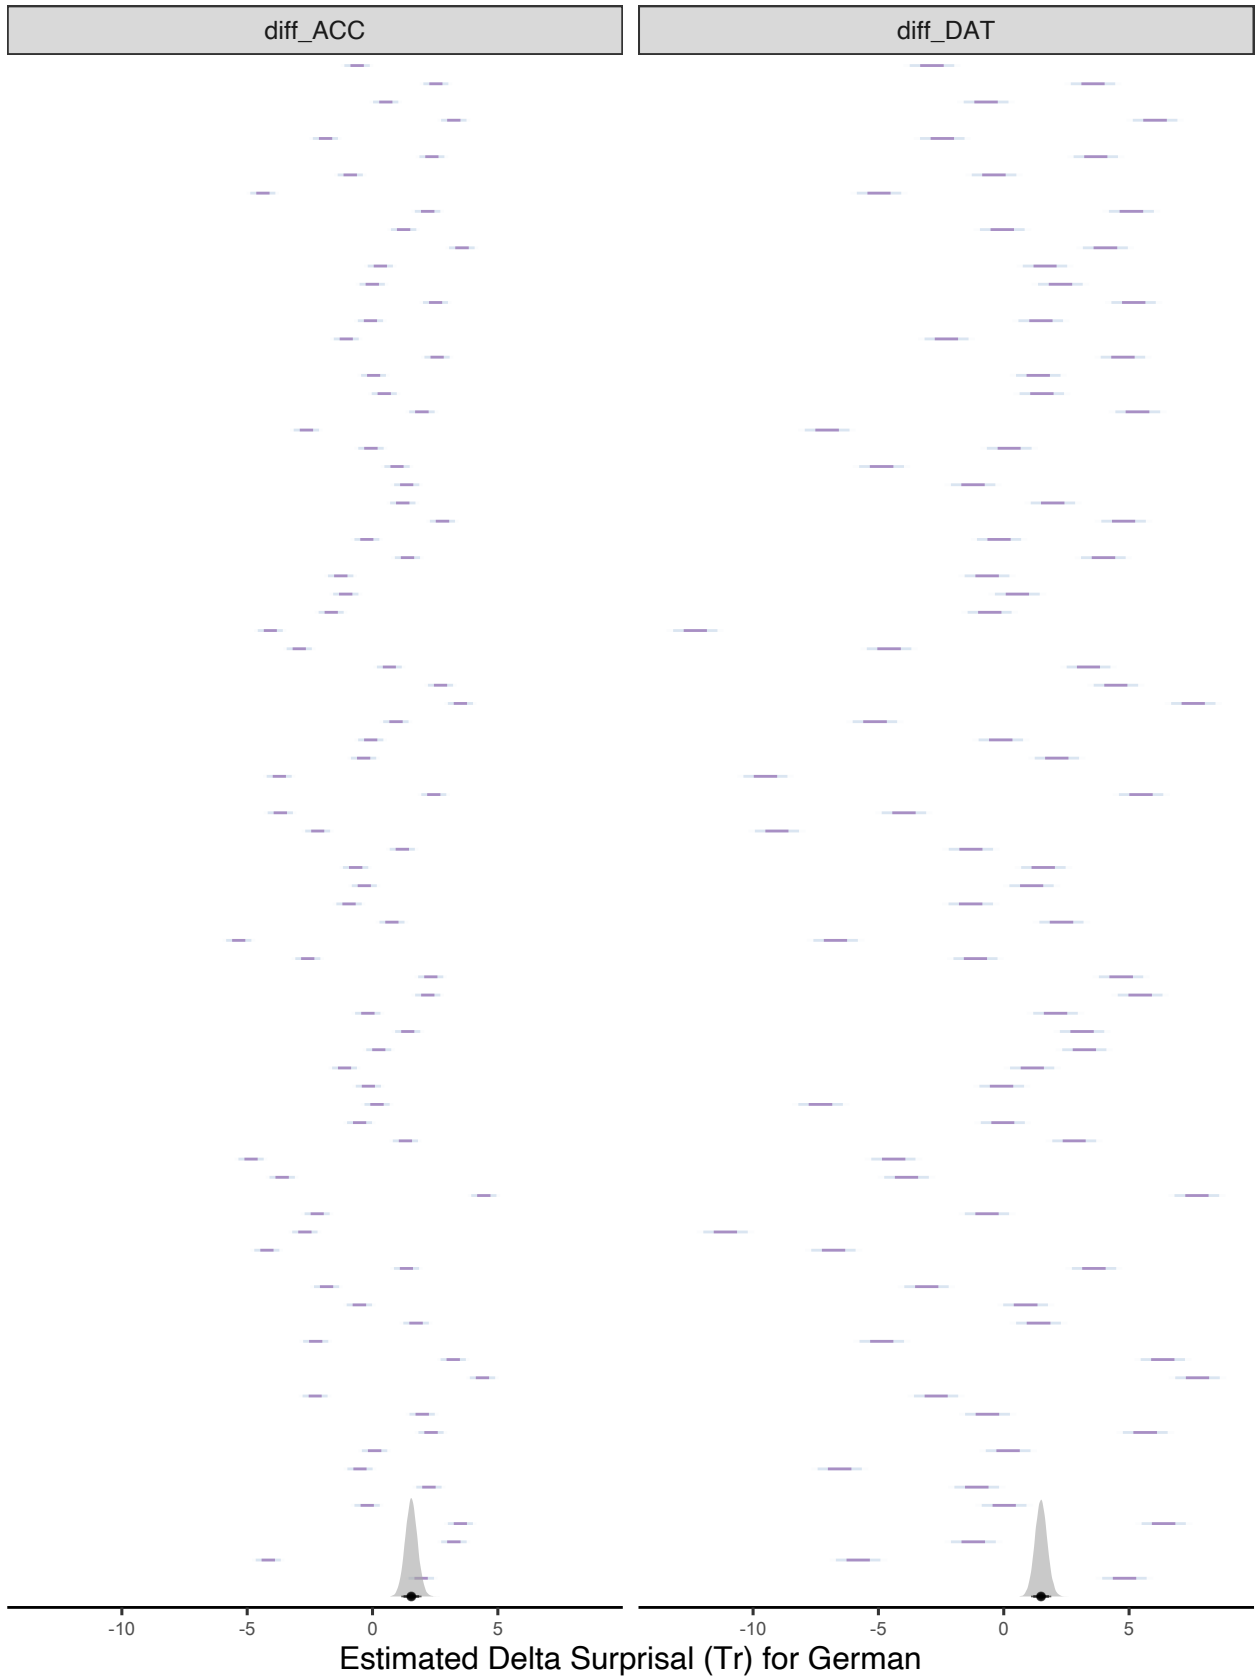

Figure S3: posterior distributions of the estimated surprisal difference between the critical conditions (agent-initial vs. patient-initial sentences), displayed for both conditions (accusative vs. dative). Surprisal is estimated by GPT-2 and both population and group level estimates are displayed. LSTM and original dataset



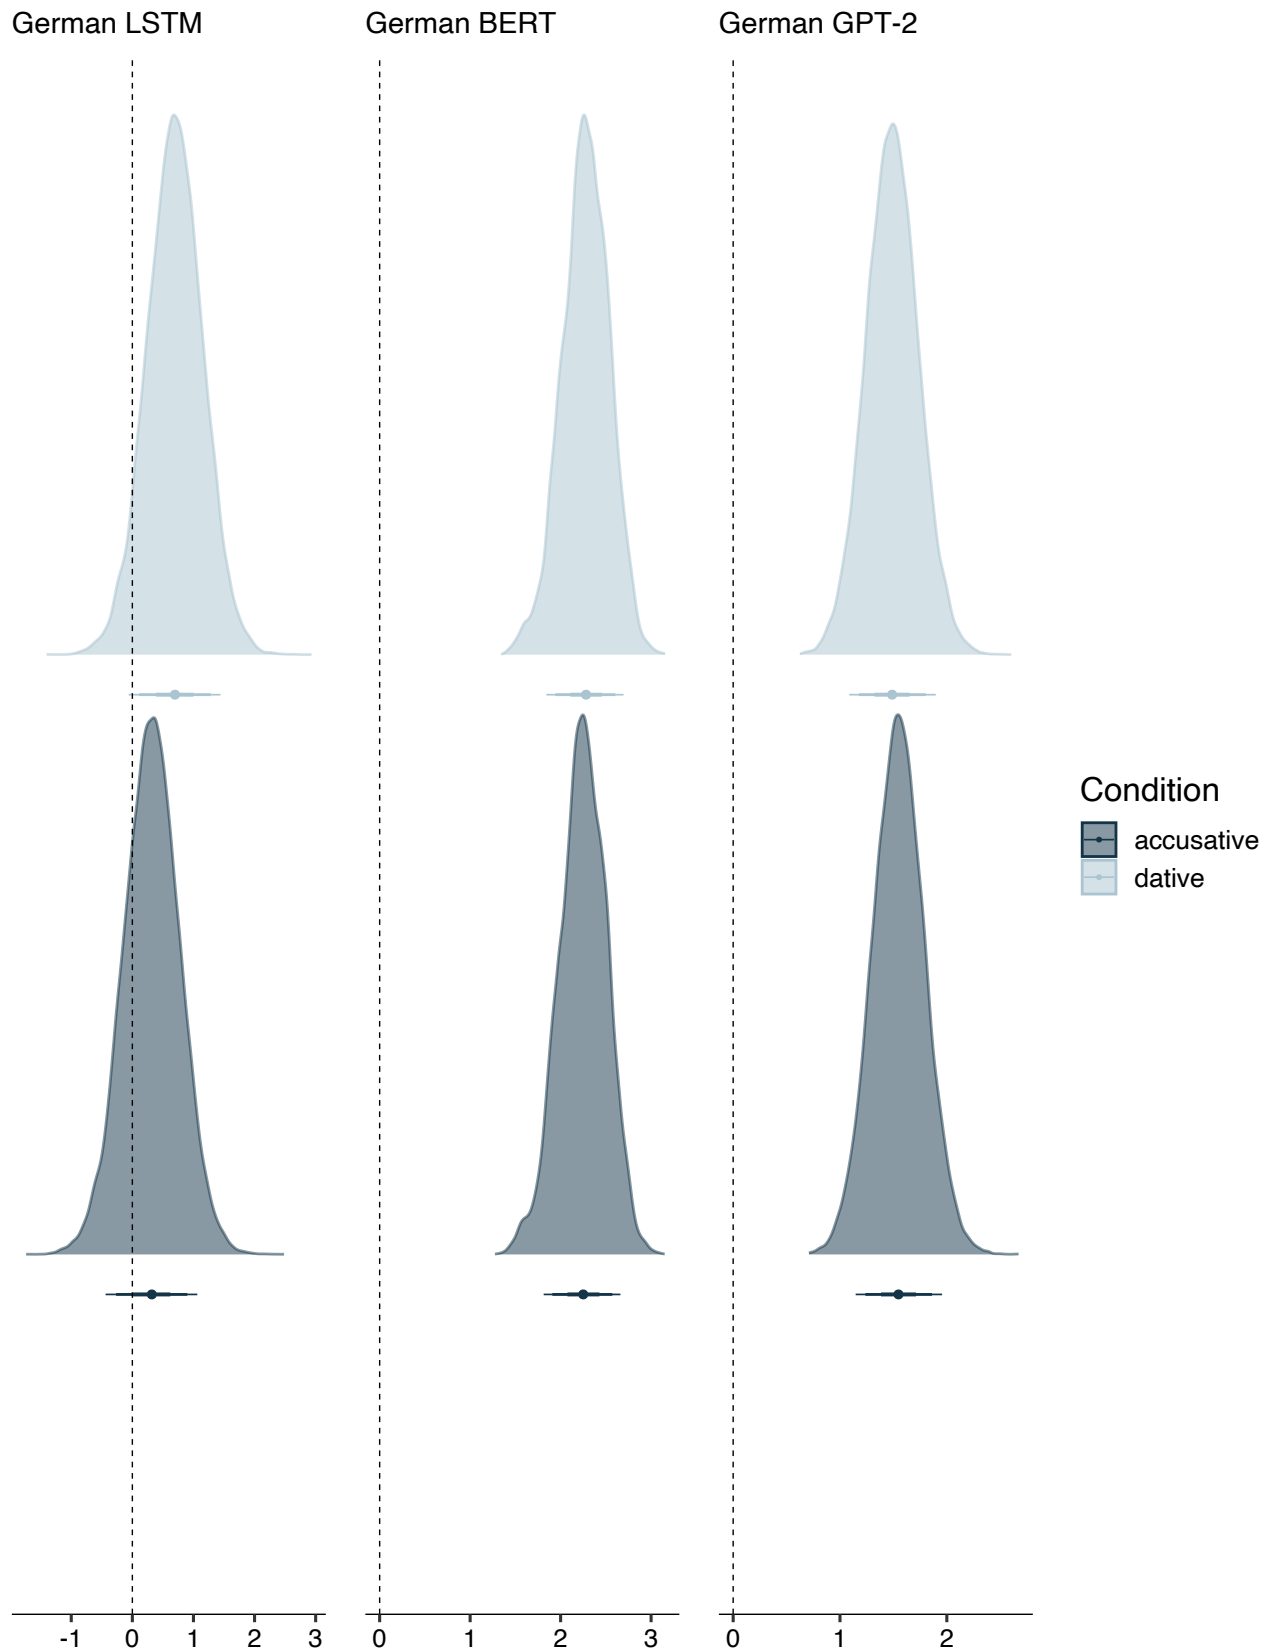

Figure S4: posterior distributions of the estimated surprisal difference between the critical conditions (agent-initial vs. patient-initial sentences), displayed for both conditions (accusative vs. dative). Surprisal is estimated by three types of language models. Only the population level is displayed.

German LSTM (extended dataset) German BERT (extended dataset) German GPT-2 (extended dataset)

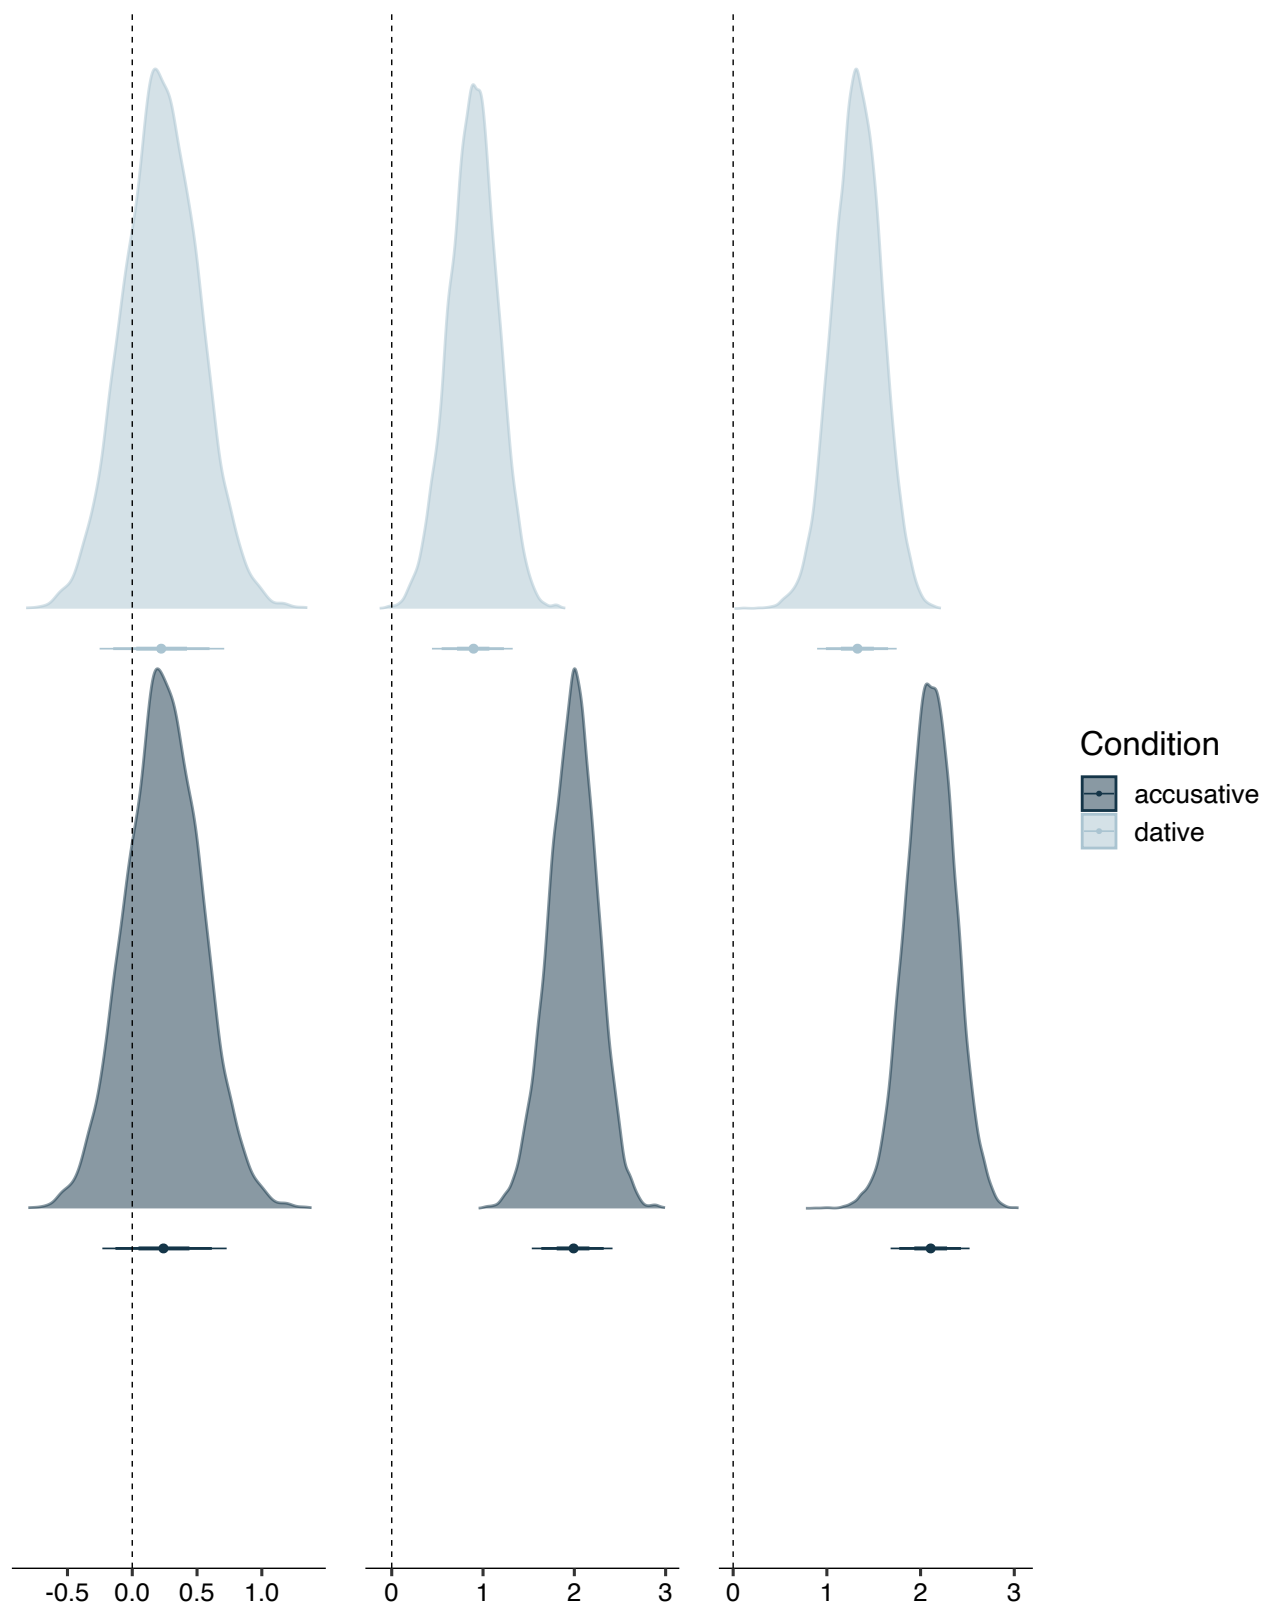

Figure S5: Results for the extended dataset: posterior distributions of the estimated surprisal difference between the critical conditions (agent-initial vs. patient-initial sentences), displayed for both conditions (accusative vs. dative). Surprisal is estimated by three types of language models. Only the population level is displayed.

```

plot.hi.lstm.ext <- draws.hi.lstm.ext %>%
  filter(Level %in% 'Population ') %>%
  mutate(Condition = ifelse(Condition %in%
                            'diff_Ipfv', 'imperfective', 'perfective')) %>%
  ggplot(aes(x = delta_surprisal, y =
             Condition,color=Condition, fill= Condition)) +
  stat_slab(alpha = .5) +
  stat_pointinterval(position = position_dodge(width = .2, preserve = "single"),
                    .width = c(.50,.80,.90)) +
  geom_vline(xintercept = 0, linetype="dashed") +
  scale_color_manual(values =
                    c('imperfective' = '#DA3C6C', 'perfective' = '#FFB5AC')) +
  scale_fill_manual(values =
                   c('imperfective' = '#DA3C6C', 'perfective' = '#FFB5AC')) +
  labs(y=NULL, x = element_blank()) +
  guides(fill="none", color="none") +
  theme(axis.text.y = element_blank(),
        #axis.text.x = element_blank(),
        panel.grid = element_blank(),
        plot.title = element_text(size=22),
        panel.border = element_blank(),
        strip.text = element_text(size=10),
        axis.line.x = element_line(size = 0.5), axis.ticks.y = element_blank(),
        plot.background = element_rect(fill = "transparent", colour = NA)) +
  labs(
    title = "Hindi LSTM (extended dataset)"
  )

plot.hi.bert.ext <- draws.hi.bert.ext %>%
  filter(Level %in% 'Population ') %>%
  mutate(Condition = ifelse(Condition %in%
                            'diff_Ipfv', 'imperfective', 'perfective')) %>%
  ggplot(aes(x = delta_surprisal, y = Condition,color=Condition, fill= Condition)) +
  stat_slab(alpha = .5) +
  stat_pointinterval(position = position_dodge(width = .2, preserve = "single"),
                    .width = c(.50,.80,.90)) +
  geom_vline(xintercept = 0, linetype="dashed") +
  scale_color_manual(values =
                    c('imperfective' = '#DA3C6C', 'perfective' = '#FFB5AC')) +
  scale_fill_manual(values =
                   c('imperfective' = '#DA3C6C', 'perfective' = '#FFB5AC')) +
  labs(y=NULL, x = element_blank()) +
  guides(fill="none", color="none") +
  theme(axis.text.y = element_blank(),
        #axis.text.x = element_blank(),
        panel.grid = element_blank(),
        panel.border = element_blank(),
        plot.title = element_text(size=22),
        strip.text = element_text(size=10),
        axis.line.x = element_line(size = 0.5), axis.ticks.y = element_blank(),
        plot.background = element_rect(fill = "transparent", colour = NA)) +
  labs(
    title = "Hindi BERT (extended dataset)"
  )

```

```

)
plot.hi.gpt.ext <- draws.hi.gpt.ext %>%
  filter(Level %in% 'Population ') %>%
  mutate(Condition = ifelse(Condition %in%
                            'diff_Ipfv', 'imperfective', 'perfective')) %>%
  ggplot(aes(x = delta_surprisal,
             y = Condition,color=Condition, fill= Condition)) +
  stat_slab(alpha = .5) +
  stat_pointinterval(position = position_dodge(width = .2, preserve = "single"),
                    .width = c(.50,.80,.90)) +
  geom_vline(xintercept = 0, linetype="dashed") +
  scale_color_manual(values =
                    c('imperfective' = '#DA3C6C', 'perfective' = '#FFB5AC')) +
  scale_fill_manual(values =
                    c('imperfective' = '#DA3C6C', 'perfective' = '#FFB5AC')) +
  labs(y=NULL, x = element_blank()) +
  theme(axis.text.y = element_blank(),
        #axis.text.x = element_blank(),
        panel.grid = element_blank(),
        panel.border = element_blank(),
        strip.text = element_text(size=10),
        axis.line.x = element_line(size = 0.5), axis.ticks.y = element_blank(),
        plot.background = element_rect(fill = "transparent", colour = NA),
        plot.title = element_text(size=22),
        legend.key.size = unit(1, 'cm'), #change legend key size
        legend.key.height = unit(1, 'cm'), #change legend key height
        legend.key.width = unit(1, 'cm'), #change legend key width
        legend.text = element_text(size=20),
        legend.title = element_text(size=25)) +
  labs(
    title = "Hindi GPT-2 (extended dataset)"
  )
)

```

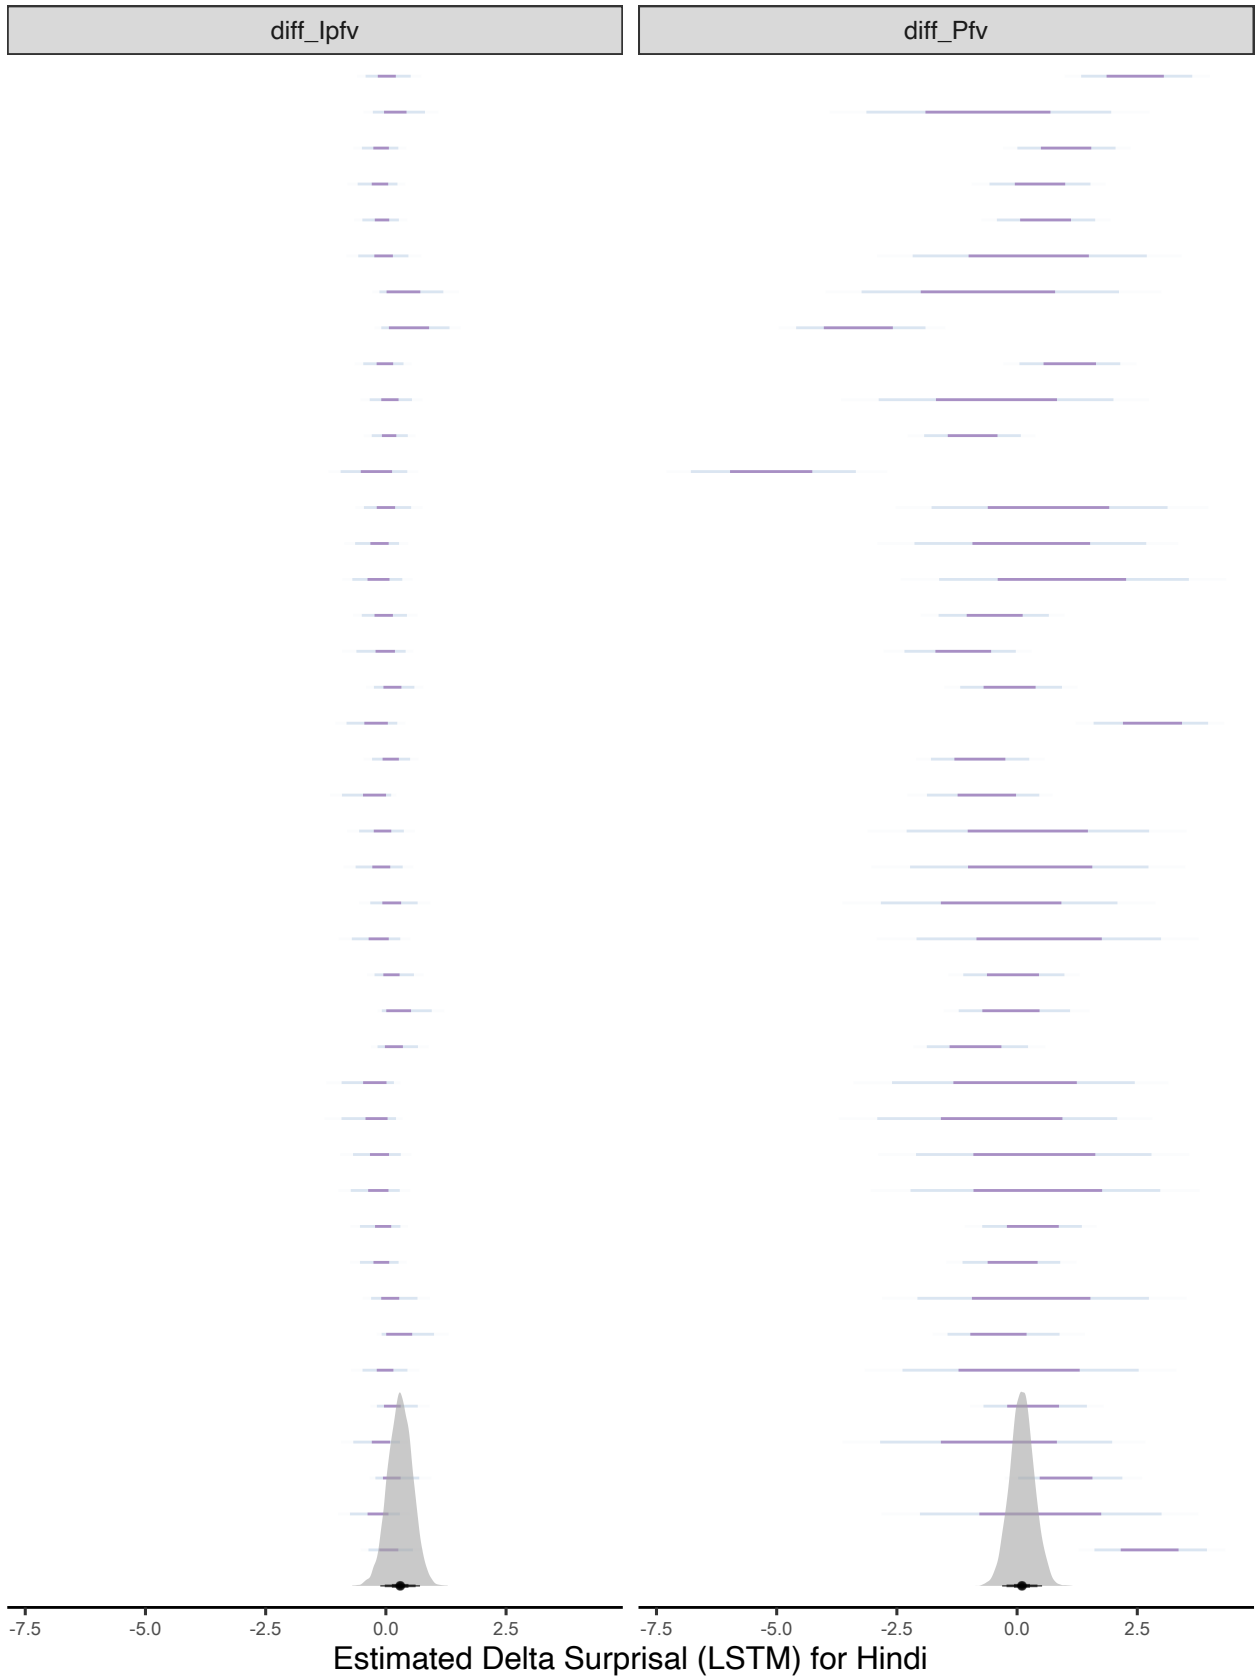

Figure S6: posterior distributions of the estimated surprisal difference between the critical conditions (ambiguous vs. unambiguous sentences), displayed for both conditions (imperfective vs. perfective). Surprisal is estimated by LSTMs and both population and group level estimates are displayed. LSTM and original dataset

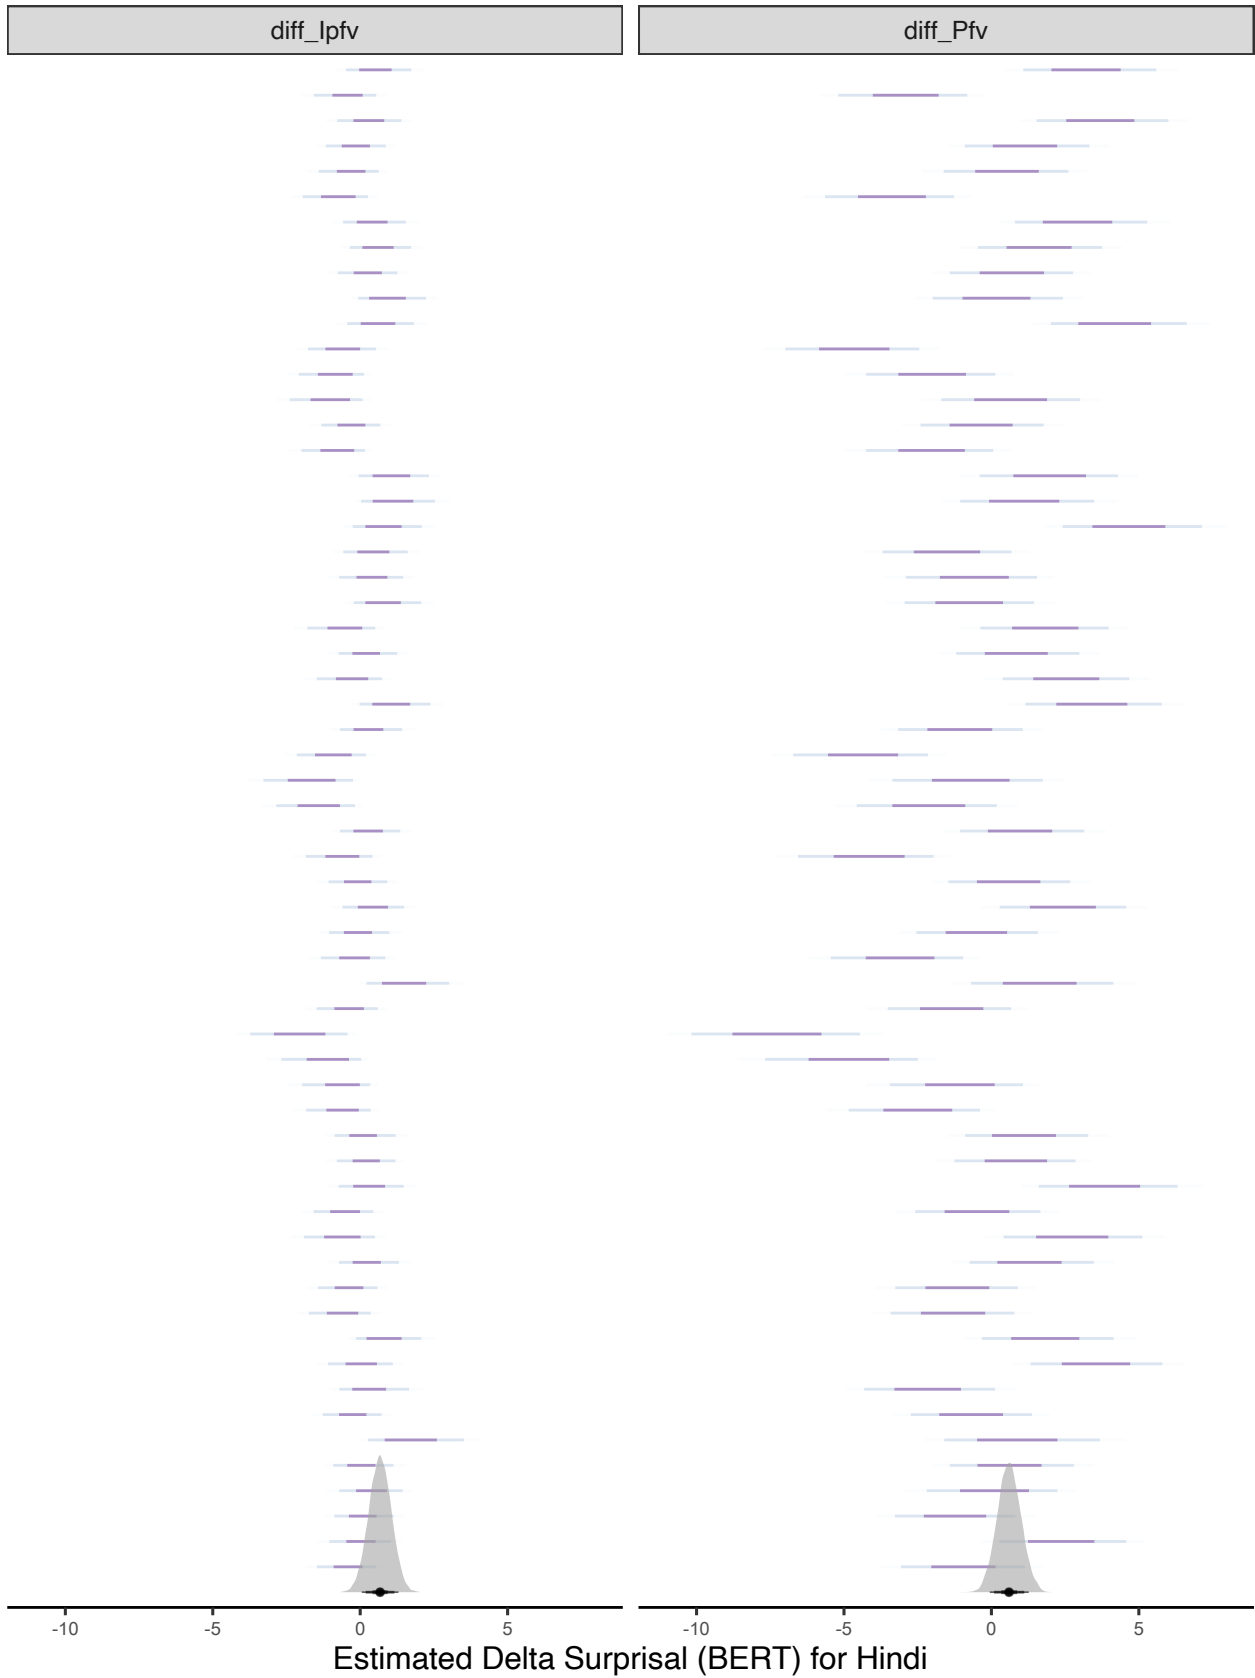

Figure S7: posterior distributions of the estimated surprisal difference between the critical conditions (ambiguous vs. unambiguous sentences), displayed for both conditions (imperfective vs. perfective). Surprisal is estimated by BERT and both population and group level estimates are displayed. LSTM and original dataset

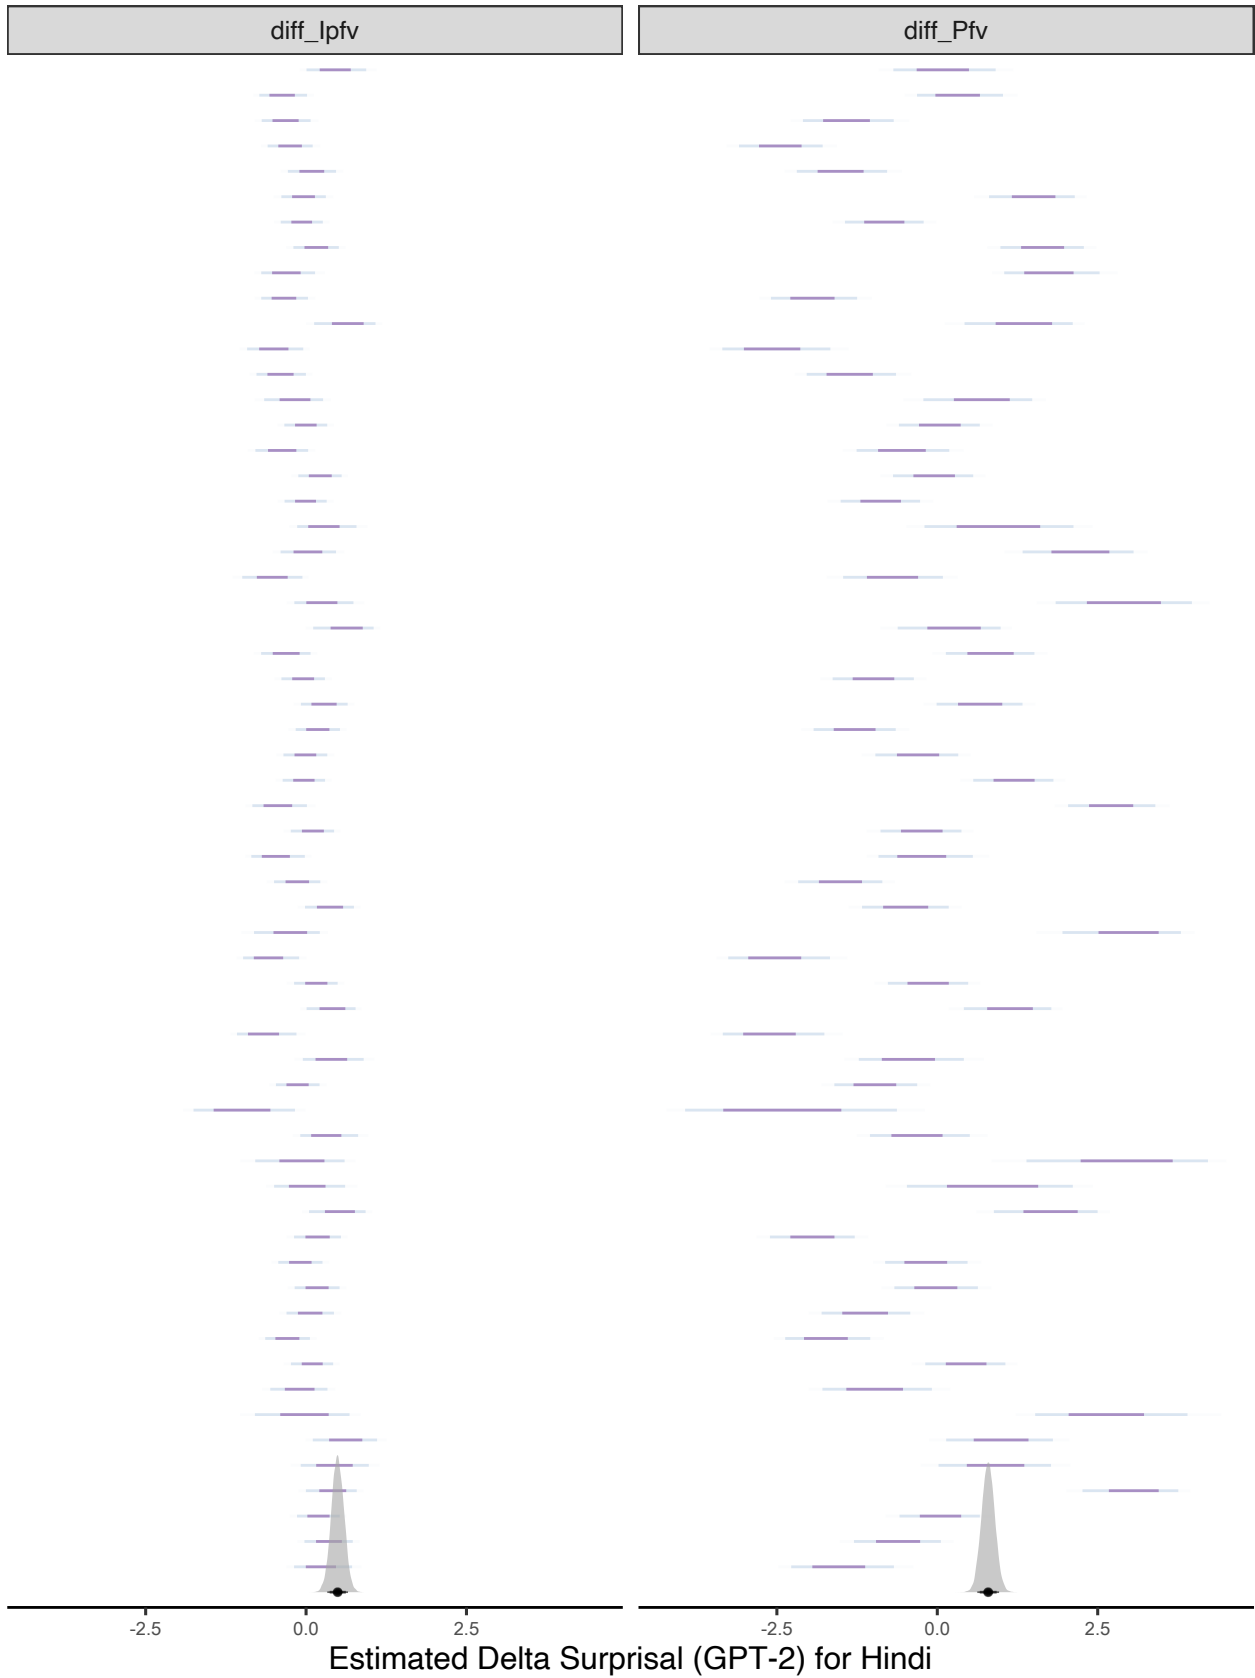

Figure S8: posterior distributions of the estimated surprisal difference between the critical conditions (ambiguous vs. unambiguous sentences), displayed for both conditions (imperfective vs. perfective). Surprisal is estimated by GPT-2 and both population and group level estimates are displayed. LSTM and original dataset

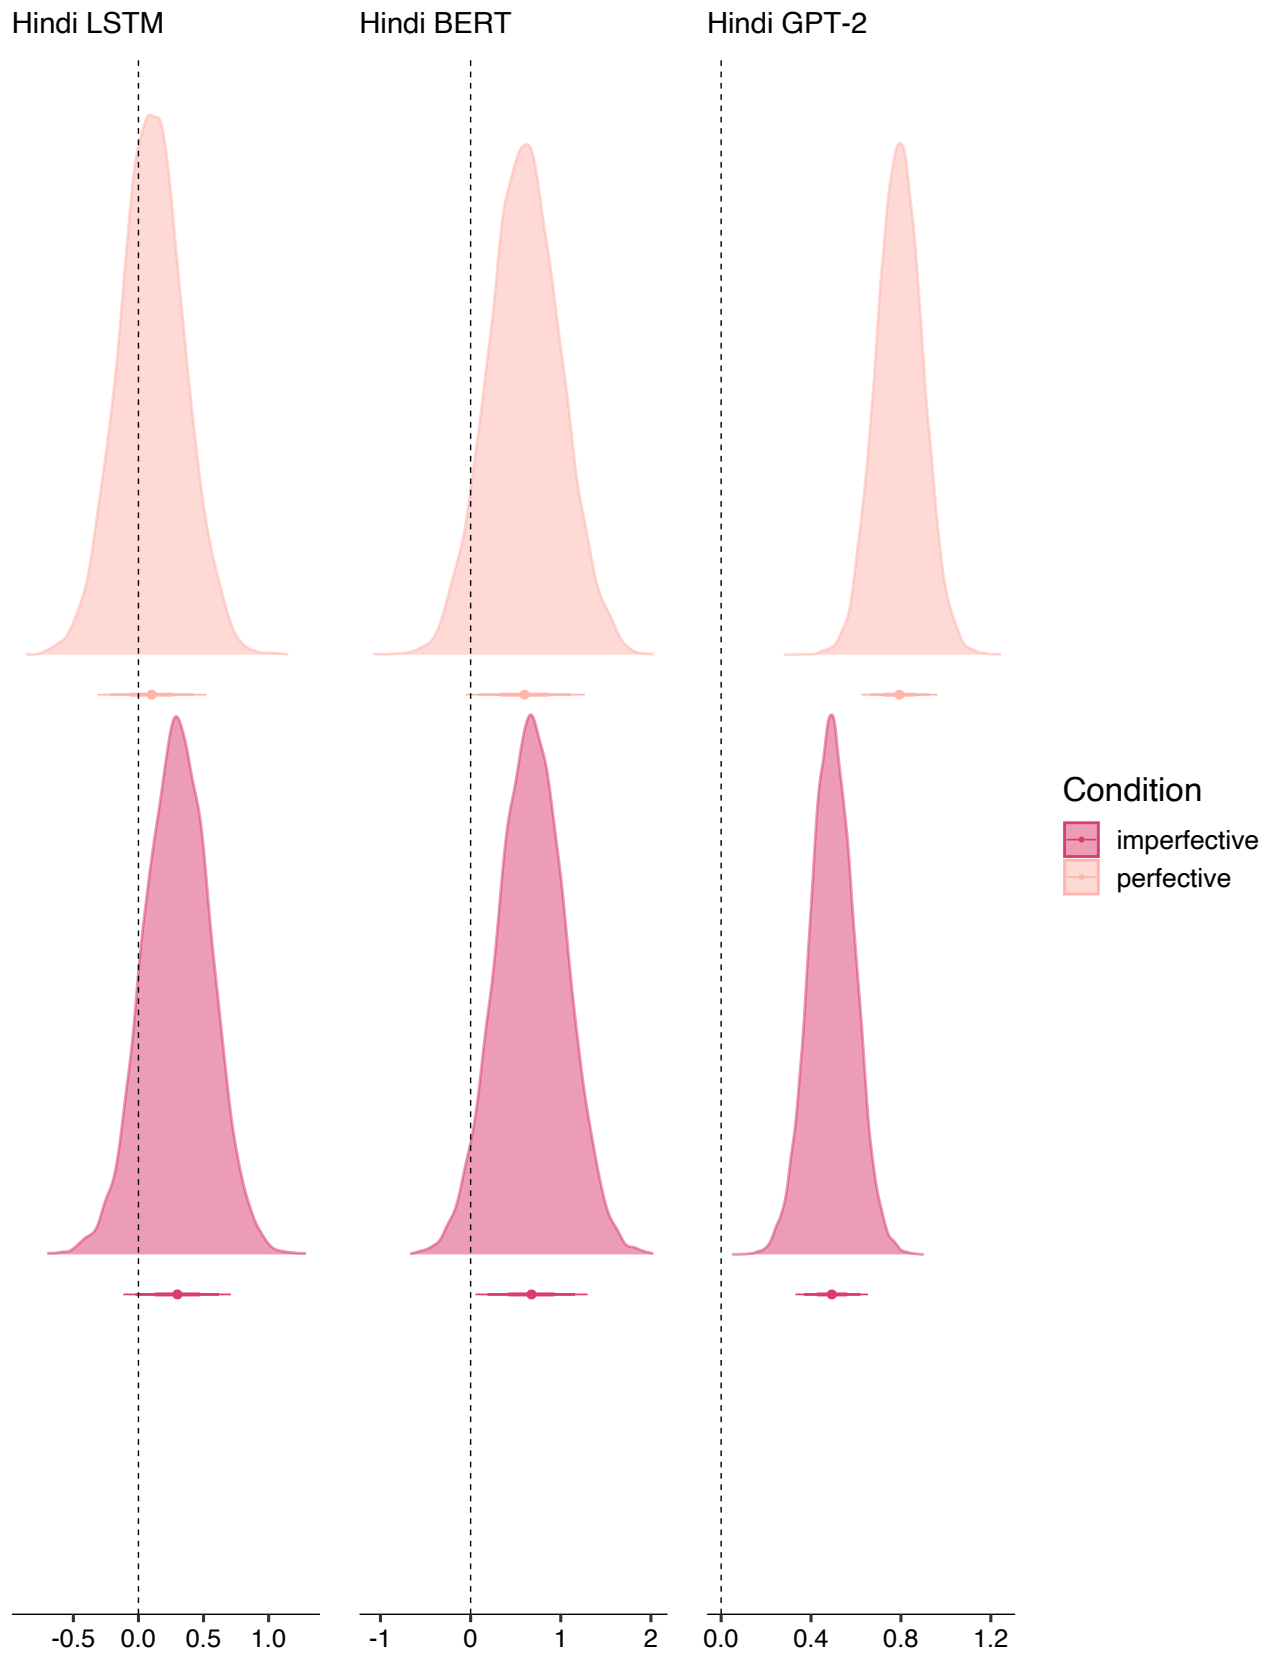

Figure S9: posterior distributions of the estimated surprisal difference between the critical conditions (ambiguous vs. unambiguous sentences), displayed for both conditions (imperfective vs. perfective). Surprisal is estimated by three types of language models. Only the population level is displayed.



Hindi LSTM (extended dataset) Hindi BERT (extended dataset) Hindi GPT-2 (extended dataset)

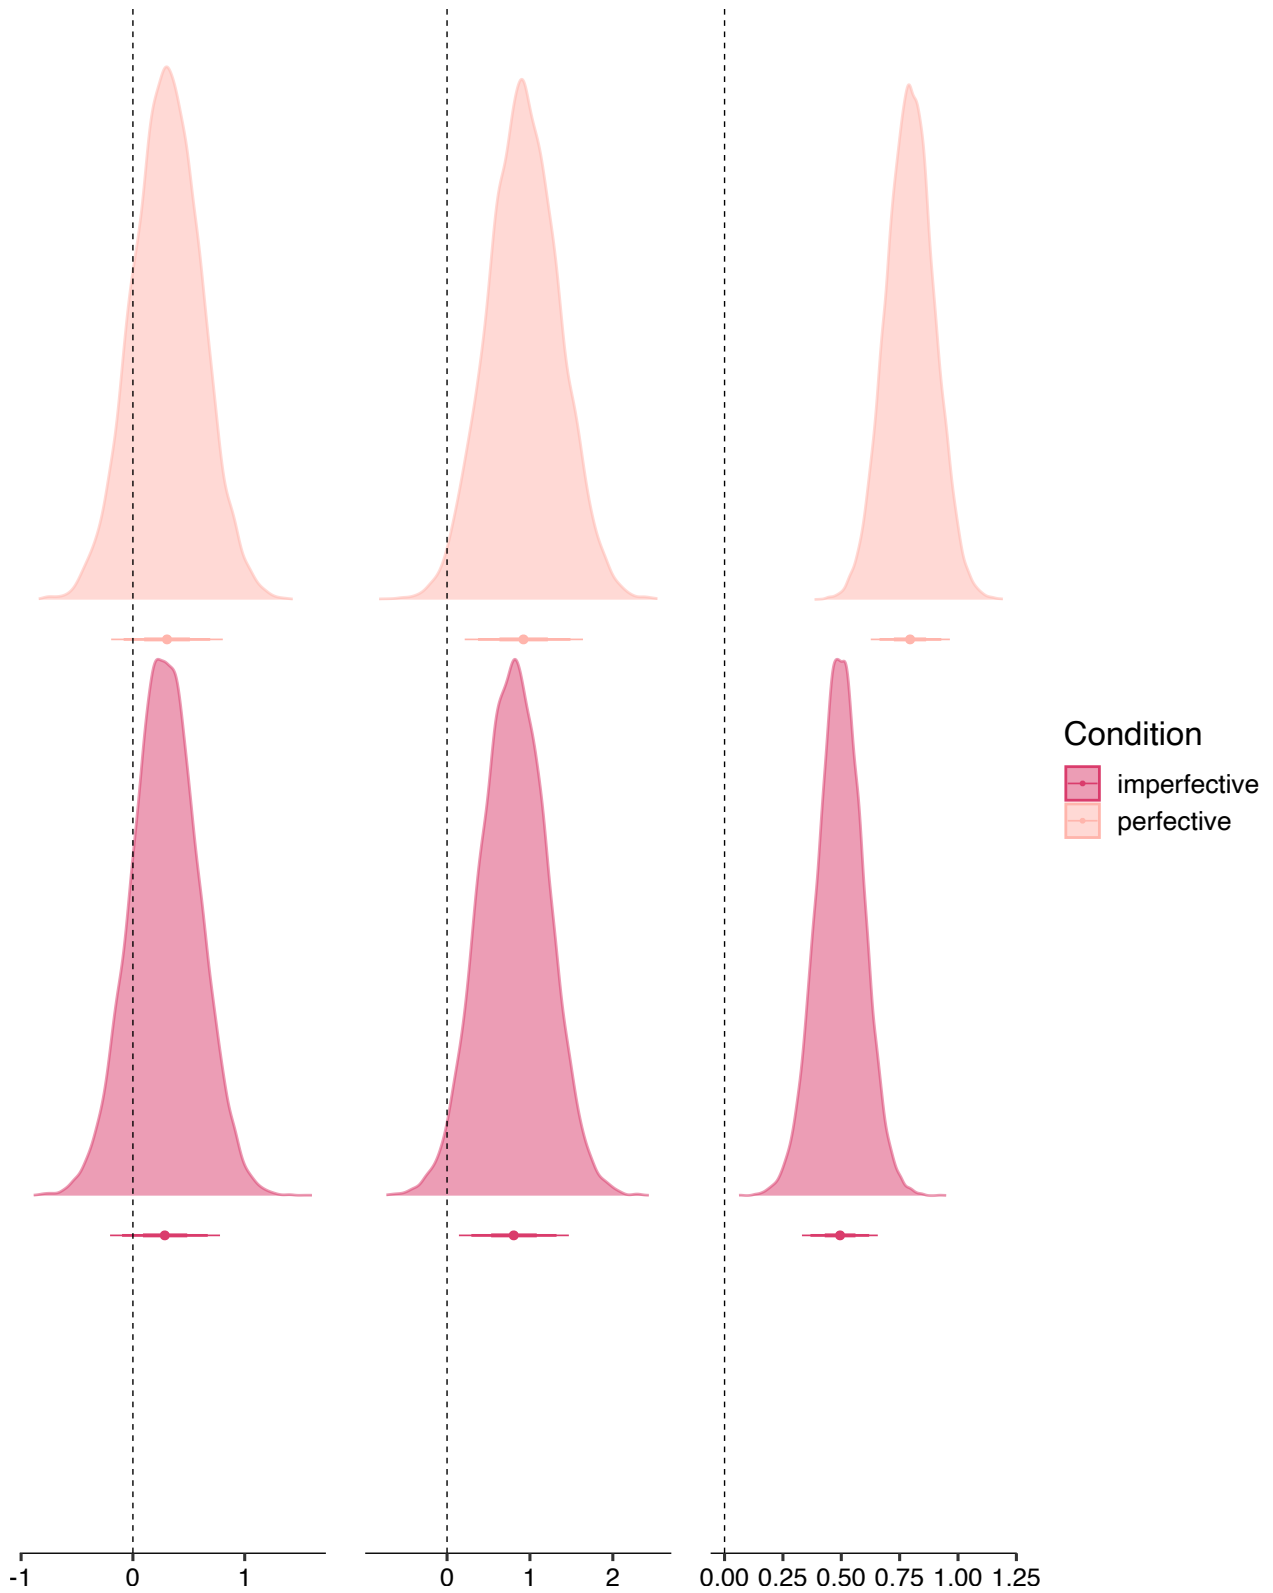

Figure S10: Results for the extended dataset: posterior distributions of the estimated surprisal difference between the critical conditions (ambiguous vs. unambiguous sentences), displayed for both conditions (imperfective vs. perfective). Surprisal is estimated by three types of language models. Only the population level is displayed.

```

plot.eu.lstm.ext <- draws.eu.lstm.ext.long %>%
  filter(Level %in% 'Population ') %>%
  mutate(Condition =
    ifelse(Condition %in% 'diff_Amb', 'ambiguous', 'unambiguous')) %>%
  ggplot(aes(x = delta_surprisal,
    y = Condition,color=Condition, fill= Condition)) +
  stat_slab(alpha = .5) +
  stat_pointinterval(position = position_dodge(width = .2, preserve = "single"),
    .width = c(.50,.80,.90)) +
  geom_vline(xintercept = 0, linetype="dashed") +
  scale_color_manual(values = c('ambiguous' = '#0B5F47',
    'unambiguous' = '#9FB39B')) +
  scale_fill_manual(values = c('ambiguous' = '#0B5F47',
    'unambiguous' = '#9FB39B')) +
  labs(y=NULL) +
  theme(axis.text.y = element_blank(),
    #axis.text.x = element_blank(),
    panel.grid = element_blank(),
    panel.border = element_blank(),
    strip.text = element_text(size=10),
    plot.title = element_text(size=22),
    axis.line.x = element_line(size = 0.5), axis.ticks.y = element_blank(),
    plot.background = element_rect(fill = "transparent", colour = NA)) +
  labs(
    title = "Basque RoBERTa"
  )
)

plot.eu.tr.ext <- draws.eu.tr.ext.long%>%
  filter(Level %in% 'Population ') %>%
  mutate(Condition =
    ifelse(Condition %in% 'diff_Amb', 'ambiguous', 'unambiguous')) %>%
  ggplot(aes(x = delta_surprisal, y = Condition,color=Condition, fill= Condition)) +
  stat_slab(alpha = .5) +
  stat_pointinterval(position = position_dodge(width = .2, preserve = "single"),
    .width = c(.50,.80,.90)) +
  geom_vline(xintercept = 0, linetype="dashed") +
  scale_color_manual(values = c('ambiguous' = '#0B5F47',
    'unambiguous' = '#9FB39B')) +
  scale_fill_manual(values = c('ambiguous' = '#0B5F47',
    'unambiguous' = '#9FB39B')) +
  labs(y=NULL) +
  theme(axis.text.y = element_blank(),
    #axis.text.x = element_blank(),
    panel.grid = element_blank(),
    panel.border = element_blank(),
    strip.text = element_text(size=10),
    plot.title = element_text(size=22),
    axis.line.x = element_line(size = 0.5), axis.ticks.y = element_blank(),
    plot.background = element_rect(fill = "transparent", colour = NA)) +
  labs(
    title = "Basque RoBERTa"
  )
)

```

```

plot.eu.gpt.ext <- draws.eu.gpt.ext.long%>%
  filter(Level %in% 'Population ') %>%
  mutate(Condition =
    ifelse(Condition %in% 'diff_Amb', 'ambiguous', 'unambiguous')) %>%
  ggplot(aes(x = delta_surprisal,
    y = Condition,color=Condition, fill= Condition)) +
  stat_slab(alpha = .5) +
  stat_pointinterval(position = position_dodge(width = .2, preserve = "single"),
    .width = c(.50,.80,.90)) +
  geom_vline(xintercept = 0, linetype="dashed") +
  scale_color_manual(values = c('ambiguous' = '#0B5F47',
    'unambiguous' = '#9FB39B')) +
  scale_fill_manual(values = c('ambiguous' = '#0B5F47',
    'unambiguous' = '#9FB39B')) +
  labs(y=NULL) +
  theme(axis.text.y = element_blank(),
    #axis.text.x = element_blank(),
    panel.grid = element_blank(),
    panel.border = element_blank(),
    strip.text = element_text(size=10),
    axis.line.x = element_line(size = 0.5), axis.ticks.y = element_blank(),
    plot.background = element_rect(fill = "transparent", colour = NA)) +
  labs(
    title = "Basque RoBERTa"
  )

```

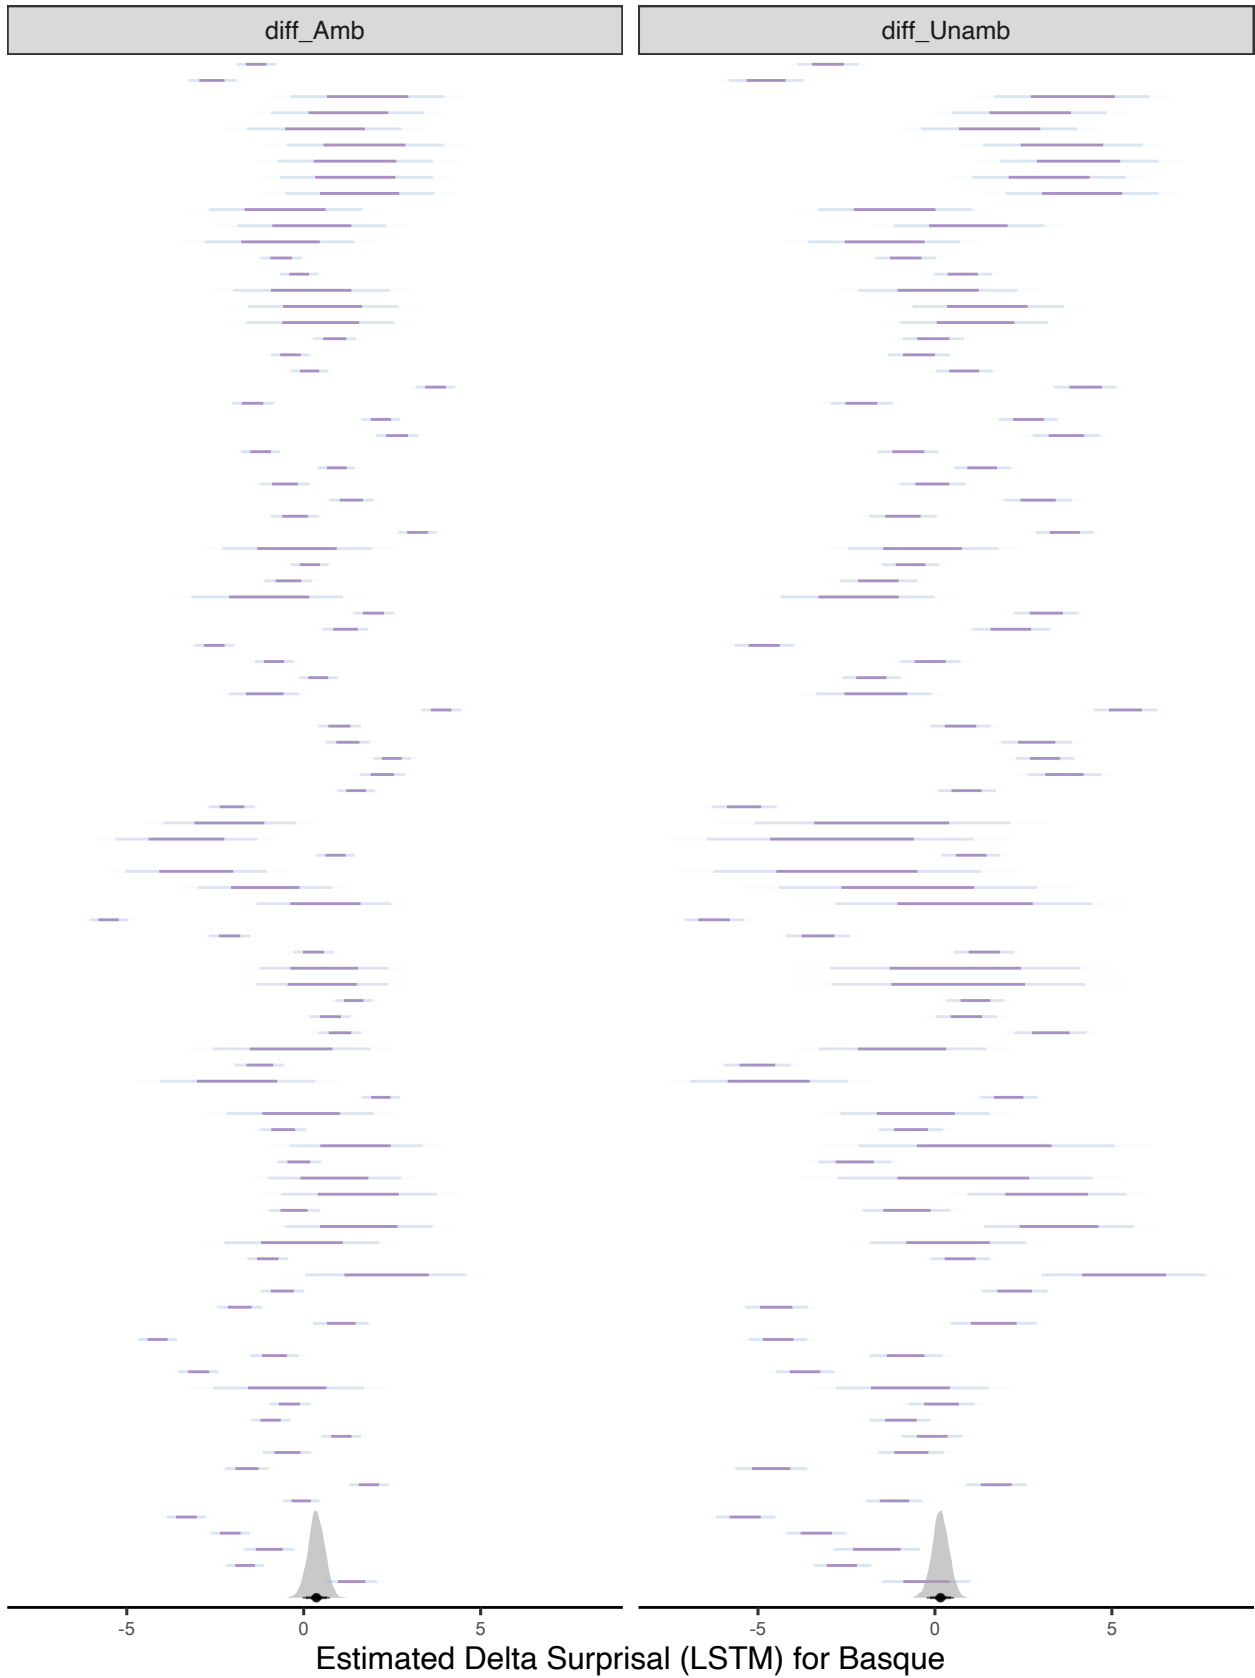

Figure S11: posterior distributions of the estimated surprisal difference between the critical conditions (agentive subject vs. patientive subject), displayed for both conditions (ambiguous vs. unambiguous). Surprisal is estimated by LSTMs and both population and group level estimates are displayed. LSTM and original dataset

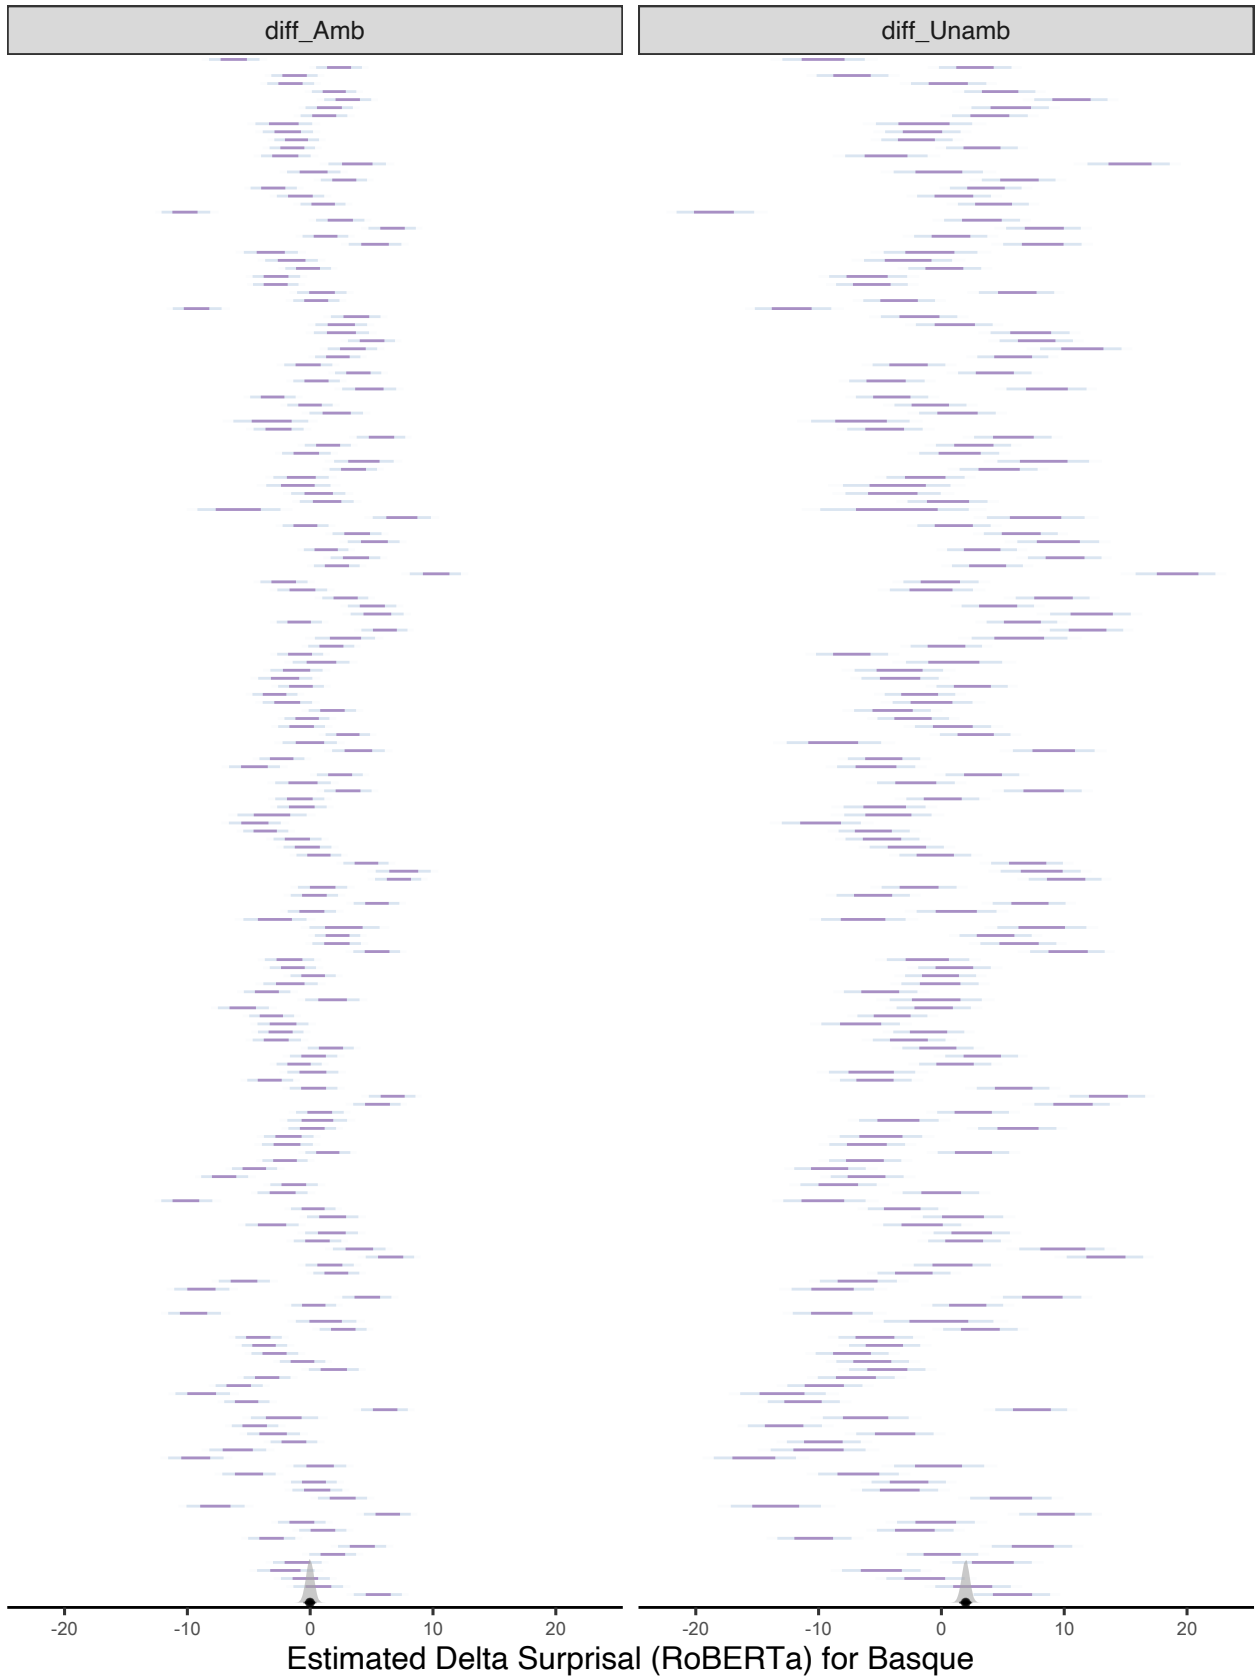

Figure S12: posterior distributions of the estimated surprisal difference between the critical conditions (agentive subject vs. patientive subject), displayed for both conditions (ambiguous vs. unambiguous). Surprisal is estimated by RoBERTa and both population and group level estimates are displayed. LSTM and original dataset

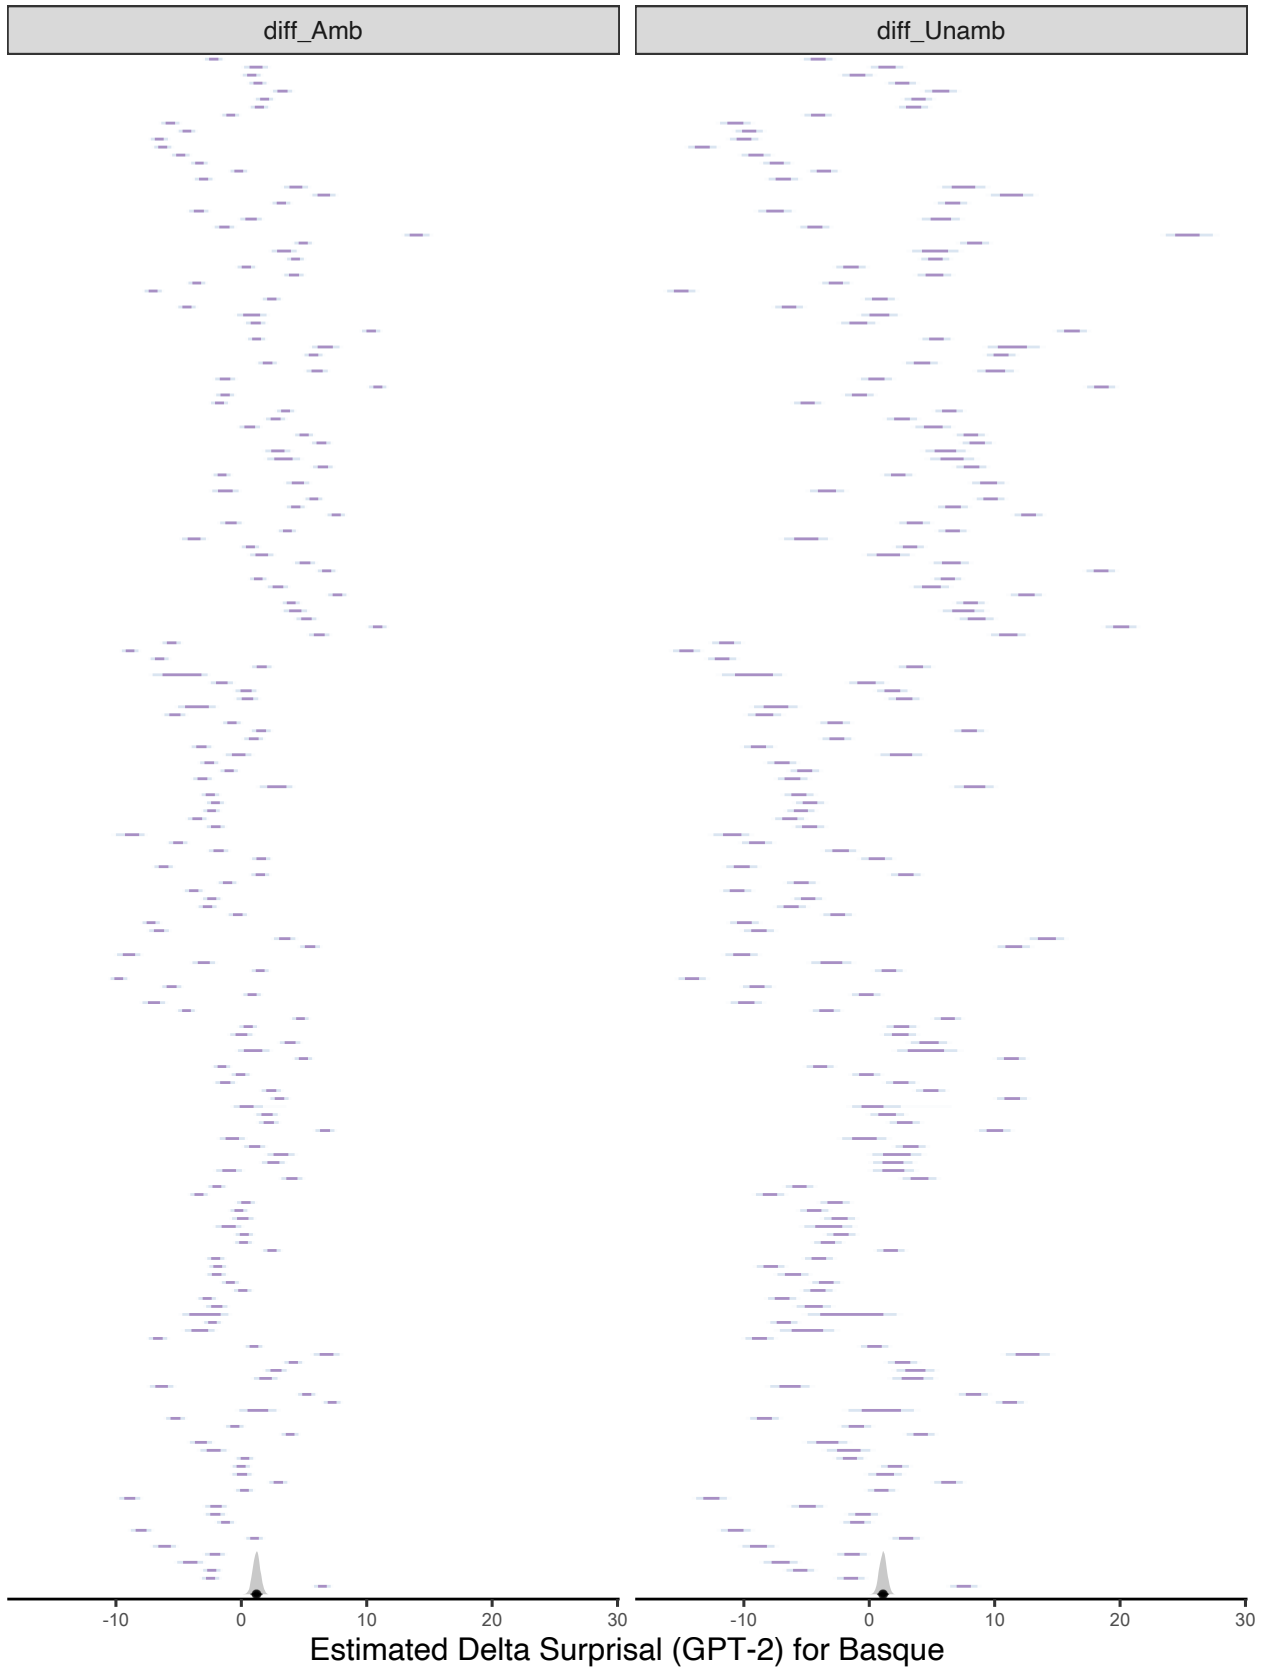

Figure S13: posterior distributions of the estimated surprisal difference between the critical conditions (agentive subject vs. patientive subject), displayed for both conditions (ambiguous vs. unambiguous). Surprisal is estimated by GPT-2 and both population and group level estimates are displayed. LSTM and original dataset

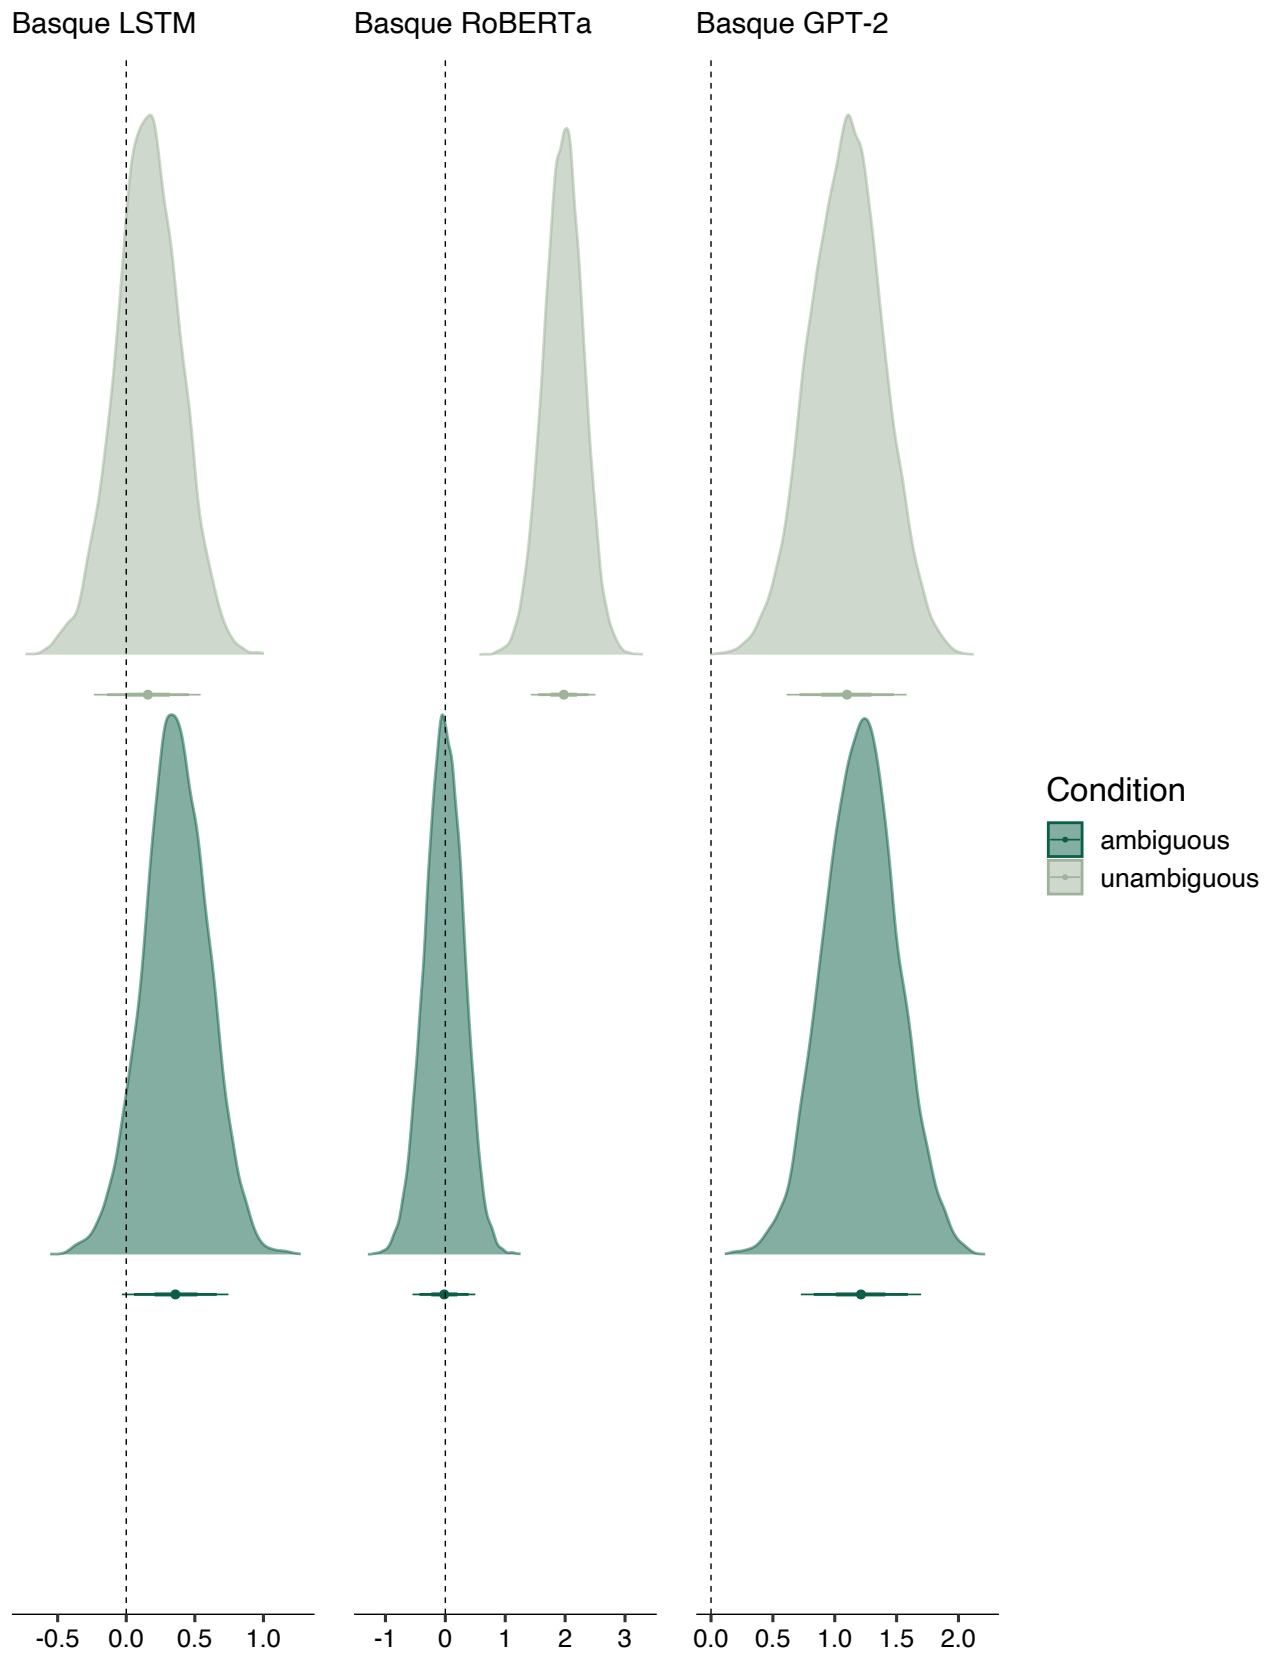

Figure S14: posterior distributions of the estimated surprisal difference between the critical conditions (agentive subject vs. patientive subject), displayed for both conditions (ambiguous vs. unambiguous). Surprisal is estimated by three types of language models. Only the population level is displayed.

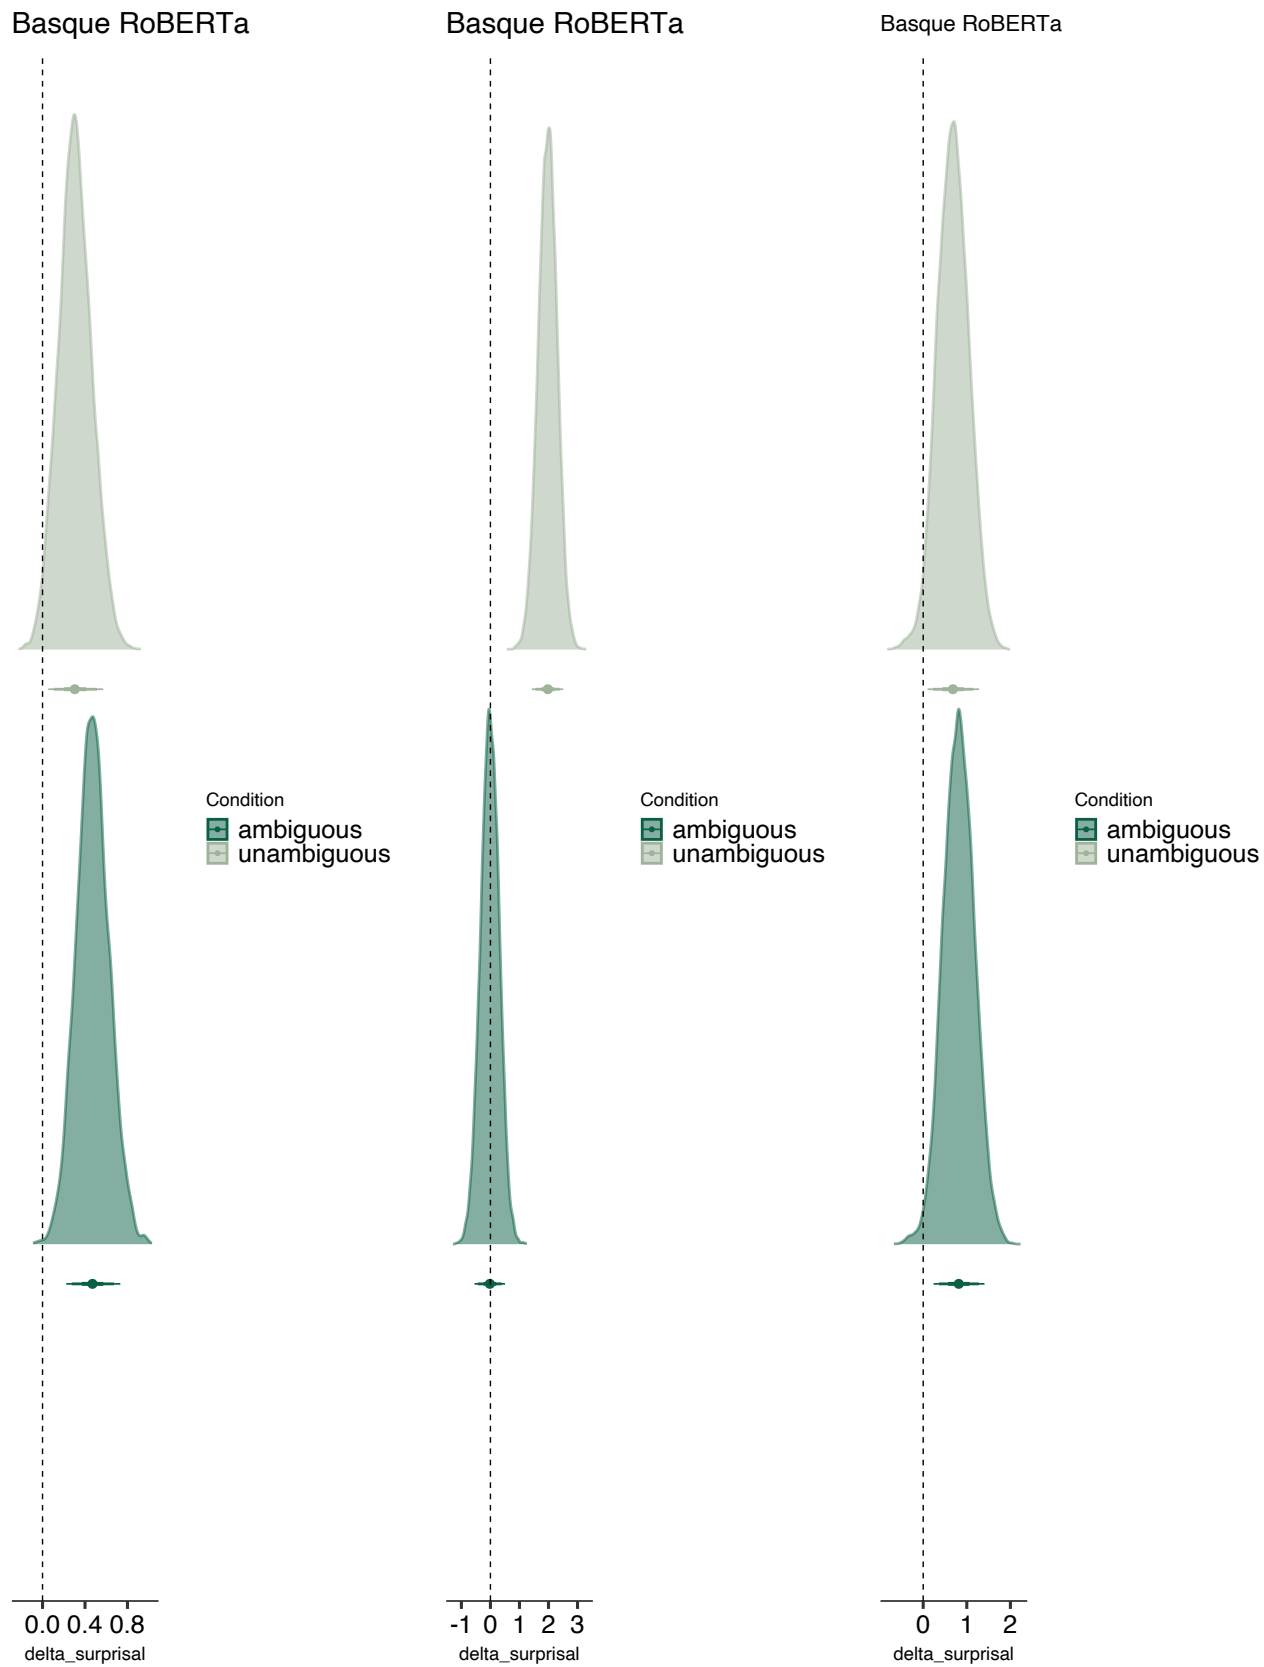

Figure S15: Results for the extended dataset: posterior distributions of the estimated surprisal difference between the critical conditions (agentive subject vs. patientive subject), displayed for both conditions (ambiguous vs. unambiguous). Surprisal is estimated by three types of language models. Only the population level is displayed.



## S3.5 T-tests

```
# relevel factors of main condition so that all should go into the same  
# direction
```

```
de.lstm.original.m$first.NP <- relevel(de.lstm.original.m$first.NP,  
                                       ref='subject')  
de.tr.original.m$first.NP <- relevel(de.tr.original.m$first.NP, ref='subject')  
  
de.gpt.original.m$first.NP <- relevel(de.gpt.original.m$first.NP, ref='subject')  
  
eu.lstm.original.m$Semantic.Role <- relevel(eu.lstm.original.m$Semantic.Role,  
                                             ref='Erg')  
eu.tr.original.m$Semantic.Role <- relevel(eu.tr.original.m$Semantic.Role ,  
                                           ref='Erg')  
  
eu.gpt.original.m$Semantic.Role <- relevel(eu.gpt.original.m$Semantic.Role,  
                                           ref='Erg')  
hi.lstm.original.m$ambiguity <- relevel(hi.lstm.original.m$ambiguity,  
                                        ref='UNAMB')  
hi.tr.original.m$ambiguity <- relevel(hi.tr.original.m$ambiguity,  
                                       ref='UNAMB')  
hi.gpt.original.m$ambiguity <- relevel(hi.gpt.original.m$ambiguity,  
                                       ref='UNAMB')
```

Filter out sentences that do not occur in both conditions for Hindi and Basque (not needed for German).

```
plus.hi.3 <- hi.lstm.original.m %>% group_by(sent_id) %>% count() %>% ungroup() %>%  
  filter(n > 3)  
  
hi.lstm.original.m.small <- hi.lstm.original.m %>% group_by(sent_id) %>%  
  filter(sent_id %in% plus.hi.3$sent_id)  
  
plus.eu.3 <- eu.lstm.original.m %>% group_by(sent_id) %>% count() %>% ungroup() %>%  
  filter(n > 3)  
  
eu.lstm.original.m.small <- eu.lstm.original.m %>% group_by(sent_id) %>%  
  filter(sent_id %in% plus.eu.3$sent_id)
```

### S3.5.1 German

```
by(de.lstm.original.m, de.lstm.original.m$verb.type, \(x) {  
  t.test(  
    formula = surprisal ~ first.NP,  
    alternative = "two.sided",  
    mu = 0,  
    paired = TRUE,  
    var.equal = FALSE,  
    data = x  
  )}  
)
```

```

## de.lstm.original.m$verb.type: acc
##
## Paired t-test
##
## data: surprisal by first.NP
## t = -7.3837, df = 287, p-value = 1.677e-12
## alternative hypothesis: true mean difference is not equal to 0
## 95 percent confidence interval:
## -1.2903013 -0.7471728
## sample estimates:
## mean difference
## -1.018737
##
## -----
## de.lstm.original.m$verb.type: dat
##
## Paired t-test
##
## data: surprisal by first.NP
## t = -2.8697, df = 223, p-value = 0.004503
## alternative hypothesis: true mean difference is not equal to 0
## 95 percent confidence interval:
## -0.7815223 -0.1451631
## sample estimates:
## mean difference
## -0.4633427

```

```

by(de.tr.original.m, de.tr.original.m$verb.type, \(x) {
  t.test(
    formula = surprisal ~ first.NP,
    alternative = "two.sided",
    mu = 0,
    paired = TRUE,
    var.equal = FALSE,
    data = x
  )}
)

```

```

## de.tr.original.m$verb.type: acc
##
## Paired t-test
##
## data: surprisal by first.NP
## t = -29.952, df = 1343, p-value < 2.2e-16
## alternative hypothesis: true mean difference is not equal to 0
## 95 percent confidence interval:
## -2.571448 -2.255319
## sample estimates:
## mean difference
## -2.413383
##
## -----
## de.tr.original.m$verb.type: dat
##

```

```
## Paired t-test
##
## data: surprisal by first.NP
## t = -31.58, df = 1343, p-value < 2.2e-16
## alternative hypothesis: true mean difference is not equal to 0
## 95 percent confidence interval:
## -2.593732 -2.290335
## sample estimates:
## mean difference
## -2.442034
```

```
by(de.gpt.original.m, de.gpt.original.m$verb.type, \(x) {
  t.test(
    formula = surprisal ~ first.NP,
    alternative = "two.sided",
    mu = 0,
    paired = TRUE,
    var.equal = FALSE,
    data = x
  )
})
```

```
## de.gpt.original.m$verb.type: acc
##
## Paired t-test
##
## data: surprisal by first.NP
## t = -12.453, df = 335, p-value < 2.2e-16
## alternative hypothesis: true mean difference is not equal to 0
## 95 percent confidence interval:
## -1.902362 -1.383350
## sample estimates:
## mean difference
## -1.642856
##
## -----
## de.gpt.original.m$verb.type: dat
##
## Paired t-test
##
## data: surprisal by first.NP
## t = -10.464, df = 335, p-value < 2.2e-16
## alternative hypothesis: true mean difference is not equal to 0
## 95 percent confidence interval:
## -1.878461 -1.283965
## sample estimates:
## mean difference
## -1.581213
```

### S3.5.2 Hindi

```

by(hi.lstm.original.m.small, hi.lstm.original.m.small$aspect, \(x) {
  t.test(
    formula = surprisal ~ ambiguity,
    alternative = "two.sided",
    mu = 0,
    paired = TRUE,
    var.equal = FALSE,
    data = x
  )}
)

```

```

## hi.lstm.original.m.small$aspect: IPFV
##
## Paired t-test
##
## data: surprisal by ambiguity
## t = -1.9349, df = 18, p-value = 0.06888
## alternative hypothesis: true mean difference is not equal to 0
## 95 percent confidence interval:
## -0.70858858 0.02915762
## sample estimates:
## mean difference
## -0.3397155
##
## -----
## hi.lstm.original.m.small$aspect: PFV
##
## Paired t-test
##
## data: surprisal by ambiguity
## t = -0.76226, df = 18, p-value = 0.4558
## alternative hypothesis: true mean difference is not equal to 0
## 95 percent confidence interval:
## -1.1928287 0.5576964
## sample estimates:
## mean difference
## -0.3175661

```

```

by(hi.tr.original.m, hi.tr.original.m$aspect, \(x) {
  t.test(
    formula = surprisal ~ ambiguity,
    alternative = "two.sided",
    mu = 0,
    paired = TRUE,
    var.equal = FALSE,
    data = x
  )}
)

```

```

## hi.tr.original.m$aspect: IPFV
##
## Paired t-test

```

```

##
## data: surprisal by ambiguity
## t = -2.7676, df = 59, p-value = 0.007531
## alternative hypothesis: true mean difference is not equal to 0
## 95 percent confidence interval:
## -1.5417153 -0.2478608
## sample estimates:
## mean difference
## -0.894788
##
## -----
## hi.tr.original.m$aspect: PFV
##
## Paired t-test
##
## data: surprisal by ambiguity
## t = -0.82032, df = 59, p-value = 0.4153
## alternative hypothesis: true mean difference is not equal to 0
## 95 percent confidence interval:
## -1.4282812 0.5977125
## sample estimates:
## mean difference
## -0.4152843

```

```

by(hi.gpt.original.m, hi.gpt.original.m$aspect, \(x) {
  t.test(
    formula = surprisal ~ ambiguity,
    alternative = "two.sided",
    mu = 0,
    paired = TRUE,
    var.equal = FALSE,
    data = x
  )}
)

```

```

## hi.gpt.original.m$aspect: IPFV
##
## Paired t-test
##
## data: surprisal by ambiguity
## t = -5.3152, df = 59, p-value = 1.711e-06
## alternative hypothesis: true mean difference is not equal to 0
## 95 percent confidence interval:
## -0.6994853 -0.3168614
## sample estimates:
## mean difference
## -0.5081734
##
## -----
## hi.gpt.original.m$aspect: PFV
##
## Paired t-test
##
## data: surprisal by ambiguity

```

```

## t = -6.9247, df = 59, p-value = 3.628e-09
## alternative hypothesis: true mean difference is not equal to 0
## 95 percent confidence interval:
## -1.085329 -0.598703
## sample estimates:
## mean difference
## -0.842016

```

### S3.5.3 Basque

```

by(eu.lstm.original.m.small, eu.lstm.original.m.small$Ambiguity, \(x) {
  t.test(
    formula = surprisal ~ Semantic.Role,
    alternative = "two.sided",
    mu = 0,
    paired = TRUE,
    var.equal = FALSE,
    data = x
  )}
)

```

```

## eu.lstm.original.m.small$Ambiguity: Amb
##
## Paired t-test
##
## data: surprisal by Semantic.Role
## t = -1.1133, df = 62, p-value = 0.2699
## alternative hypothesis: true mean difference is not equal to 0
## 95 percent confidence interval:
## -0.7673943 0.2183654
## sample estimates:
## mean difference
## -0.2745145
##
## -----
## eu.lstm.original.m.small$Ambiguity: Unamb
##
## Paired t-test
##
## data: surprisal by Semantic.Role
## t = -0.26373, df = 62, p-value = 0.7929
## alternative hypothesis: true mean difference is not equal to 0
## 95 percent confidence interval:
## -0.5617005 0.4307620
## sample estimates:
## mean difference
## -0.06546924

```

```

by(eu.tr.original.m, eu.tr.original.m$Ambiguity, \(x) {
  t.test(
    formula = surprisal ~ Semantic.Role,
    alternative = "two.sided",

```

```

mu = 0,
paired = TRUE,
var.equal = FALSE,
data = x
)}
)

```

```

## eu.tr.original.m$Ambiguity: Amb
##
## Paired t-test
##
## data: surprisal by Semantic.Role
## t = 0.40248, df = 191, p-value = 0.6878
## alternative hypothesis: true mean difference is not equal to 0
## 95 percent confidence interval:
## -0.4980268 0.7533769
## sample estimates:
## mean difference
## 0.1276751
##
## -----

```

```

## eu.tr.original.m$Ambiguity: Unamb
##
## Paired t-test
##
## data: surprisal by Semantic.Role
## t = -5.7423, df = 191, p-value = 3.627e-08
## alternative hypothesis: true mean difference is not equal to 0
## 95 percent confidence interval:
## -2.759120 -1.348251
## sample estimates:
## mean difference
## -2.053686

```

```

by(eu.gpt.original.m, eu.gpt.original.m$Ambiguity, \(x) {
  t.test(
    formula = surprisal ~ Semantic.Role,
    alternative = "two.sided",
    mu = 0,
    paired = TRUE,
    var.equal = FALSE,
    data = x
  )}
)

```

```

## eu.gpt.original.m$Ambiguity: Amb
##
## Paired t-test
##
## data: surprisal by Semantic.Role
## t = -4.2648, df = 191, p-value = 3.145e-05
## alternative hypothesis: true mean difference is not equal to 0
## 95 percent confidence interval:

```

```
## -1.9397948 -0.7129097
## sample estimates:
## mean difference
##      -1.326352
##
## -----
## eu.gpt.original.m$Ambiguity: Unamb
##
## Paired t-test
##
## data: surprisal by Semantic.Role
## t = -3.9972, df = 191, p-value = 9.151e-05
## alternative hypothesis: true mean difference is not equal to 0
## 95 percent confidence interval:
## -1.8955227 -0.6428979
## sample estimates:
## mean difference
##      -1.26921
```



### **3 Analysis 2: Predicting ERPs for German**

# S3: Study 2: Predicting ERPs (German)\*

Eva Huber      Sebastian Sauppe      Arrate Isasi-Isasmendi  
Ina Bornkessel-Schlesewsky      Paola Merlo      Balthasar Bickel

August 29, 2023

## Contents

|                                               |          |
|-----------------------------------------------|----------|
| <b>S3 German</b>                              | <b>1</b> |
| S3.1 Models . . . . .                         | 1        |
| S3.2 Model comparison with stacking . . . . . | 14       |
| S3.3 Model predictions . . . . .              | 15       |

**REPRODUCIBILITY STATEMENT:** All of the models included here were fitted on an M1 processor using R Version 4.2.2 and brms version 2.14.0.

## S3 German

### S3.1 Models

We model the EEG results in micro-volt (mV below). For this, we fit Bayesian Generalised Additive Models in `brms` with different predictors and compare models by means of stacking in order to find the model with highest predictive performance. In the model below `condition` refers to whether or not we expect a reanalysis (see main text).

We check convergence by ensuring that Effective Sample Size  $ESS > 100$  and diagnostic  $\hat{R} < 1.05$ . Additionally, we perform posterior predictive checks to compare the predicted values to the observed data.

#### S3.1.1 Agent preference alone

```
german.data <- readRDS('../results/german_mv_surprisal_new.RDS')

if (!file.exists('../gams_fitted_models/gam_de_agent.RDS')){
  prior.brms <- c(
    prior(normal(0,1), class = b),
    prior(exponential(1), class = sigma)
  )
  model.agent <- brm(mV
    ~ 1
    + condition
```

---

\*This document was `rmarkdown::render`'ed from an R script 'main\_scripts/German\_analysis2.R' available at <https://osf.io/hbj67>.

```

+ trial_number.Z
+ t2(x, y, by = condition, k = 10)
+ t2(x, y, Participant, bs = "re")
+ t2(x, y, Stimulus, bs = "re"),
data = german.data,
sample_prior = TRUE,
prior = prior.brms,
chains = 4, iter = 2000, cores = 4
)
saveRDS(model.agent, '../gams_fitted_models/gam_de_agent.RDS')
}
model.de.agent <- readRDS('../gams_fitted_models/gam_de_agent.RDS')
summary(model.de.agent)

```

```

## Family: gaussian
## Links: mu = identity; sigma = identity
## Formula: mV ~ 1 + condition + trial_number.Z + t2(x, y, by = condition, k = 10) + t2(x, y, Participant)
## Data: german.data (Number of observations: 20961)
## Samples: 4 chains, each with iter = 2000; warmup = 1000; thin = 1;
## total post-warmup samples = 4000
##
## Smooth Terms:
##
## Estimate Est.Error 1-95% CI u-95% CI Rhat Bulk_ESS Tail_ESS
## sds(t2xyconditionAbias_1) 1.49 1.34 0.06 5.09 1.00 2308 2694
## sds(t2xyconditionAbias_2) 2.92 2.73 0.11 9.37 1.00 1785 2716
## sds(t2xyconditionAbias_3) 5.74 3.25 0.63 13.38 1.00 1892 1462
## sds(t2xyconditionnonAbias_1) 1.12 1.08 0.03 3.99 1.00 2373 2194
## sds(t2xyconditionnonAbias_2) 3.02 2.64 0.11 9.81 1.00 1727 2718
## sds(t2xyconditionnonAbias_3) 5.73 2.68 1.40 12.22 1.00 1509 1192
## sds(t2xyParticipant_1) 0.15 0.11 0.01 0.39 1.00 2385 2704
## sds(t2xyStimulus_1) 0.14 0.10 0.01 0.38 1.00 2264 1794
##
## Population-Level Effects:
##
## Estimate Est.Error 1-95% CI u-95% CI Rhat Bulk_ESS Tail_ESS
## Intercept 1.05 0.15 0.75 1.35 1.00 4096 3345
## condition2 0.09 0.19 -0.28 0.48 1.00 3775 3296
## trial_number.Z -0.62 0.07 -0.76 -0.48 1.00 9384 2496
## t2xy:conditionAbias_1 0.09 0.19 -0.27 0.46 1.00 3308 3079
## t2xy:conditionAbias_2 0.09 0.15 -0.19 0.40 1.00 5073 3162
## t2xy:conditionAbias_3 0.05 0.20 -0.34 0.45 1.00 6395 3509
## t2xy:conditionnonAbias_1 0.53 0.16 0.22 0.83 1.00 2379 2059
## t2xy:conditionnonAbias_2 0.20 0.12 -0.06 0.43 1.00 5003 3267
## t2xy:conditionnonAbias_3 0.22 0.17 -0.11 0.55 1.00 6145 2789
##
## Family Specific Parameters:
##
## Estimate Est.Error 1-95% CI u-95% CI Rhat Bulk_ESS Tail_ESS
## sigma 9.39 0.05 9.29 9.48 1.00 10137 2674
##
## Samples were drawn using sampling(NUTS). For each parameter, Bulk_ESS
## and Tail_ESS are effective sample size measures, and Rhat is the potential
## scale reduction factor on split chains (at convergence, Rhat = 1).

```

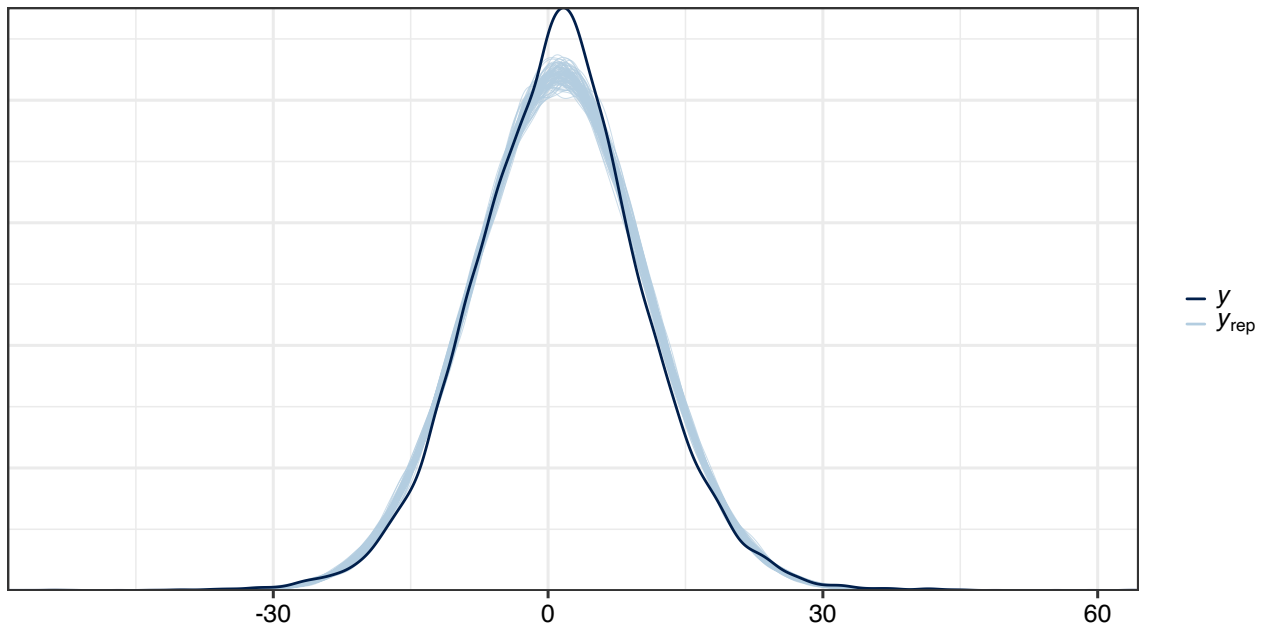

### S3.1.2 Surprisal alone

LSTM-based surprisal:

```
if (!file.exists('../gams_fitted_models/gam_de_lstm.RDS')){
  prior.brms <- c(
    prior(normal(0,1), class = b),
    prior(exponential(1), class = sigma)
  )
  model.surprisal.lstm <- brm(mV
    ~ 1
    + trial_number.Z
    + surprisal.lstm.Z
    + t2(x, y, by = surprisal.lstm.Z, k = 10)
    + t2(x, y, Participant, bs = "re")
    + t2(x, y, Stimulus, bs = "re"),
    prior = prior.brms,
    sample_prior = TRUE,
    data = german.data,
    chains = 4, iter = 2000, cores = 4
  )
  saveRDS(model.surprisal.lstm,
    '../gams_fitted_models/gam_de_lstm.RDS')
}
model.de.surplstm <- readRDS('../gams_fitted_models/gam_de_lstm.RDS')
summary(model.de.surplstm)
```

```
## Family: gaussian
## Links: mu = identity; sigma = identity
## Formula: mV ~ 1 + trial_number.Z + surprisal.lstm.Z + t2(x, y, by = surprisal.lstm.Z, k = 10) + t2(x
## Data: german.data (Number of observations: 20961)
## Samples: 4 chains, each with iter = 2000; warmup = 1000; thin = 1;
```

```

##           total post-warmup samples = 4000
##
## Smooth Terms:
##           Estimate Est.Error l-95% CI u-95% CI Rhat Bulk_ESS Tail_ESS
## sds(t2xysurprisal.lstm.Z_1)    0.85    0.78    0.03    2.94 1.00    2441    2141
## sds(t2xysurprisal.lstm.Z_2)    1.82    1.67    0.06    6.19 1.00    2188    1952
## sds(t2xysurprisal.lstm.Z_3)    2.31    1.81    0.09    6.93 1.00    1671    1421
## sds(t2xyParticipant_1)         0.15    0.11    0.01    0.41 1.01    1616    1165
## sds(t2xyStimulus_1)           0.14    0.11    0.00    0.40 1.00    1767    1611
##
## Population-Level Effects:
##           Estimate Est.Error l-95% CI u-95% CI Rhat Bulk_ESS Tail_ESS
## Intercept                1.19    0.06    1.06    1.31 1.00    6957    3221
## trial_number.Z           -0.57    0.06   -0.70   -0.45 1.00    7189    2986
## surprisal.lstm.Z         -0.30    0.75   -1.78    1.16 1.00    2961    3055
## t2xy:surprisal.lstm.Z_1   -0.33    0.68   -1.65    0.99 1.00    2962    2869
## t2xy:surprisal.lstm.Z_2   -0.38    0.09   -0.56   -0.20 1.00    3340    3234
## t2xy:surprisal.lstm.Z_3    0.12    0.09   -0.04    0.30 1.00    3533    2926
## t2xy:surprisal.lstm.Z_4    0.07    0.12   -0.16    0.30 1.00    4991    2987
##
## Family Specific Parameters:
##           Estimate Est.Error l-95% CI u-95% CI Rhat Bulk_ESS Tail_ESS
## sigma          9.36    0.05    9.27    9.45 1.00    14016    2816
##
## Samples were drawn using sampling(NUTS). For each parameter, Bulk_ESS
## and Tail_ESS are effective sample size measures, and Rhat is the potential
## scale reduction factor on split chains (at convergence, Rhat = 1).

```

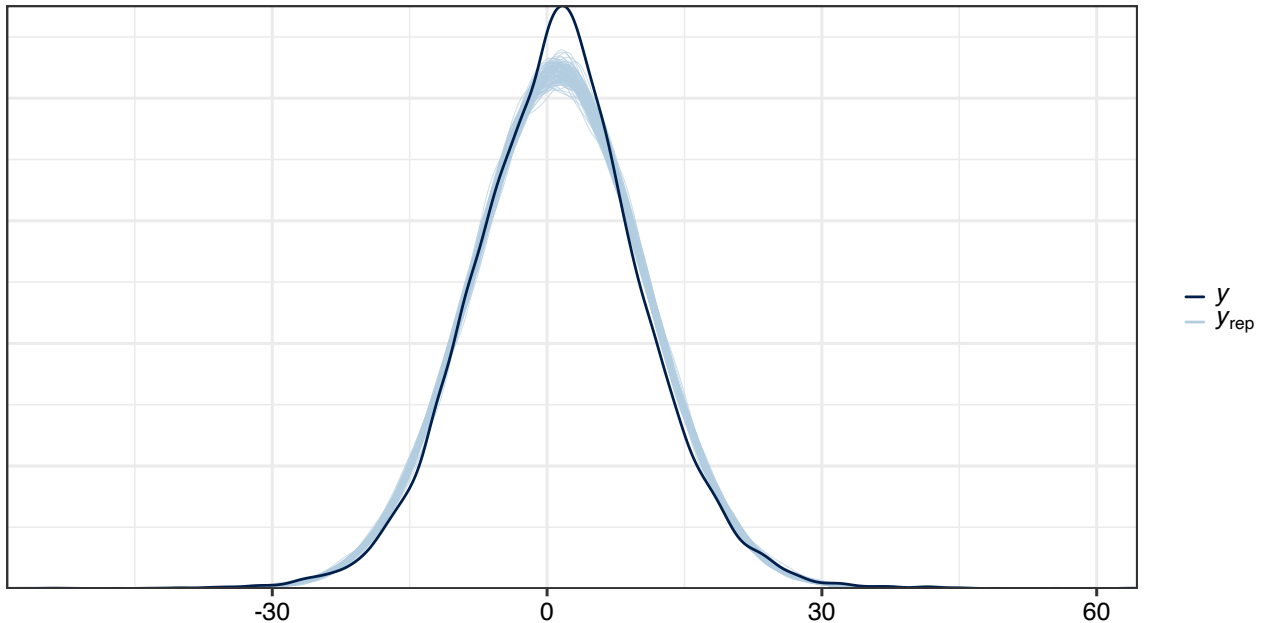

BERT-based surprisal:

```

if (!file.exists('../gams_fitted_models/gam_de_bert.RDS')){
  prior.brms <- c(
    prior(normal(0,1), class = b),
    prior(exponential(1), class = sigma)
  )
}

```

```

)
model.surprisal.tr <- brm(mV
  ~ 1
  + trial_number.Z
  + surprisal.tr.Z
  + t2(x, y, by = surprisal.tr.Z, k = 10)
  + t2(x, y, Participant, bs = "re")
  + t2(x, y, Stimulus, bs = "re"),
  prior = prior.brms,
  sample_prior = TRUE,
  data = german.data,
  chains = 4, iter = 2000, cores = 4
)
saveRDS(model.surprisal.tr,
  '../gams_fitted_models/gam_de_bert.RDS')
}
model.de.surptr <- readRDS('../gams_fitted_models/gam_de_bert.RDS')
summary(model.de.surptr)

```

```

## Family: gaussian
## Links: mu = identity; sigma = identity
## Formula: mV ~ 1 + trial_number.Z + surprisal.tr.Z + t2(x, y, by = surprisal.tr.Z, k = 10) + t2(x, y,
## Data: german.data (Number of observations: 20961)
## Samples: 4 chains, each with iter = 2000; warmup = 1000; thin = 1;
## total post-warmup samples = 4000
##
## Smooth Terms:
## Estimate Est.Error 1-95% CI u-95% CI Rhat Bulk_ESS Tail_ESS
## sds(t2xysurprisal.tr.Z_1) 0.89 0.82 0.03 3.02 1.00 2227 2056
## sds(t2xysurprisal.tr.Z_2) 1.59 1.44 0.06 5.47 1.00 1985 1828
## sds(t2xysurprisal.tr.Z_3) 1.92 1.64 0.07 6.20 1.00 1902 1974
## sds(t2xyParticipant_1) 0.15 0.11 0.01 0.41 1.00 2096 1943
## sds(t2xyStimulus_1) 0.14 0.11 0.00 0.39 1.00 1668 1434
##
## Population-Level Effects:
## Estimate Est.Error 1-95% CI u-95% CI Rhat Bulk_ESS Tail_ESS
## Intercept 1.19 0.07 1.05 1.32 1.00 7341 2320
## trial_number.Z -0.60 0.06 -0.72 -0.48 1.00 8825 2716
## surprisal.tr.Z -0.15 0.76 -1.61 1.32 1.00 3104 2850
## t2xy:surprisal.tr.Z_1 -0.15 0.68 -1.47 1.18 1.00 3137 2986
## t2xy:surprisal.tr.Z_2 -0.22 0.09 -0.38 -0.04 1.00 4326 3394
## t2xy:surprisal.tr.Z_3 0.04 0.08 -0.12 0.21 1.00 5172 3362
## t2xy:surprisal.tr.Z_4 -0.08 0.12 -0.31 0.16 1.00 5300 3089
##
## Family Specific Parameters:
## Estimate Est.Error 1-95% CI u-95% CI Rhat Bulk_ESS Tail_ESS
## sigma 9.39 0.05 9.30 9.48 1.00 12235 2784
##
## Samples were drawn using sampling(NUTS). For each parameter, Bulk_ESS
## and Tail_ESS are effective sample size measures, and Rhat is the potential
## scale reduction factor on split chains (at convergence, Rhat = 1).

```

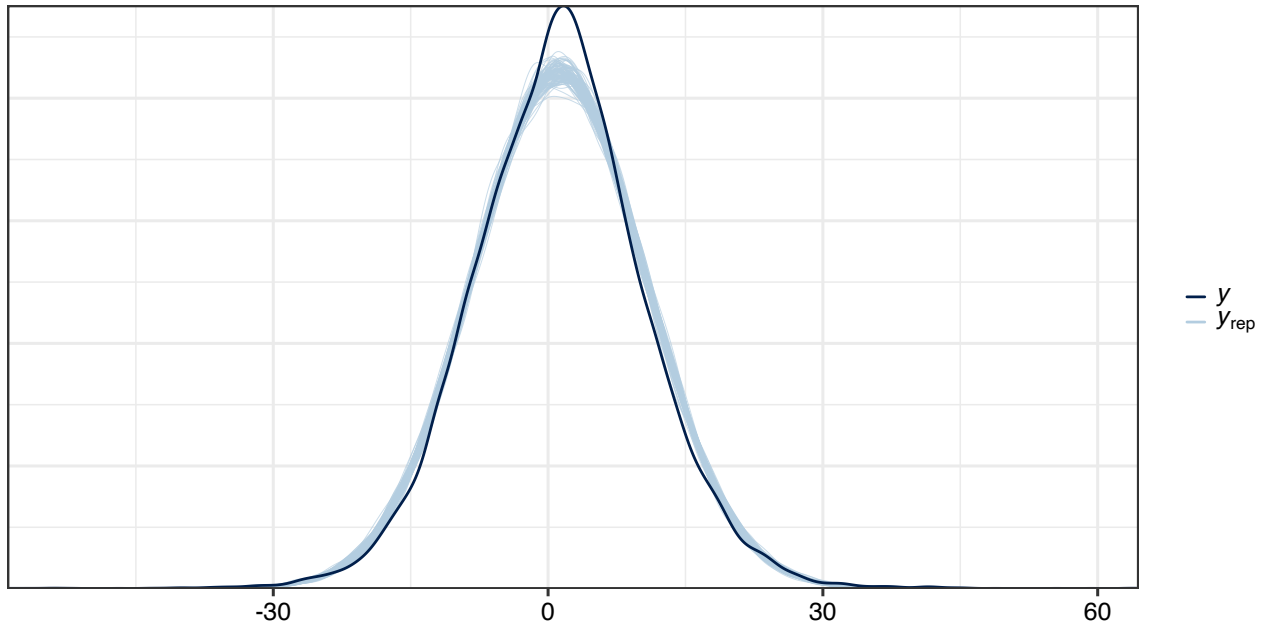

GPT-based surprisal:

```
if (!file.exists('../gams_fitted_models/gam_de_gpt.RDS')){
  prior.brms <- c(
    prior(normal(0,1), class = b),
    prior(exponential(1), class = sigma)
  )
  model.surprisal.gpt <- brm(mV
    ~ 1
    + trial_number.Z
    + surprisal.gpt.Z
    + t2(x, y, by = surprisal.gpt.Z, k = 10)
    + t2(x, y, Participant, bs = "re")
    + t2(x, y, Stimulus, bs = "re"),
    prior = prior.brms,
    sample_prior = TRUE,
    data = german.data,
    chains = 4, iter = 2000, cores = 4
  )
  saveRDS(model.surprisal.gpt,
    '../gams_fitted_models/gam_de_gpt.RDS')
}
model.de.surpgpt <- readRDS('../gams_fitted_models/gam_de_gpt.RDS')
summary(model.de.surpgpt)
```

```
## Family: gaussian
## Links: mu = identity; sigma = identity
## Formula: mV ~ 1 + trial_number.Z + surprisal.gpt.Z + t2(x, y, by = surprisal.gpt.Z, k = 10) + t2(x, y, Participant, bs = "re") + t2(x, y, Stimulus, bs = "re")
## Data: german.data (Number of observations: 20961)
## Samples: 4 chains, each with iter = 2000; warmup = 1000; thin = 1;
##           total post-warmup samples = 4000
##
## Smooth Terms:
##           Estimate Est.Error 1-95% CI u-95% CI Rhat Bulk_ESS Tail_ESS
```

```

## sds(t2xysurprisal.gpt.Z_1)      0.85      0.79      0.02      2.88 1.00      2478      1636
## sds(t2xysurprisal.gpt.Z_2)      1.78      1.60      0.07      5.91 1.00      1826      1841
## sds(t2xysurprisal.gpt.Z_3)      1.79      1.67      0.06      6.14 1.00      1953      2109
## sds(t2xyParticipant_1)           0.15      0.11      0.00      0.42 1.00      1848      1630
## sds(t2xyStimulus_1)              0.14      0.10      0.01      0.39 1.00      1900      1918
##
## Population-Level Effects:
##           Estimate Est.Error 1-95% CI u-95% CI Rhat Bulk_ESS Tail_ESS
## Intercept           1.19     0.06    1.06    1.31 1.00     8010     2736
## trial_number.Z      -0.56     0.07   -0.69   -0.43 1.00     7363     2960
## surprisal.gpt.Z     -0.15     0.74   -1.66    1.31 1.00     3086     2788
## t2xy:surprisal.gpt.Z_1 -0.15     0.66   -1.47    1.17 1.00     3096     2814
## t2xy:surprisal.gpt.Z_2 -0.22     0.09   -0.38   -0.04 1.00     4095     3227
## t2xy:surprisal.gpt.Z_3  0.04     0.09   -0.12    0.22 1.00     3830     2668
## t2xy:surprisal.gpt.Z_4 -0.09     0.11   -0.32    0.12 1.00     4409     3015
##
## Family Specific Parameters:
##           Estimate Est.Error 1-95% CI u-95% CI Rhat Bulk_ESS Tail_ESS
## sigma      9.39      0.05    9.30    9.48 1.00    12165     2817
##
## Samples were drawn using sampling(NUTS). For each parameter, Bulk_ESS
## and Tail_ESS are effective sample size measures, and Rhat is the potential
## scale reduction factor on split chains (at convergence, Rhat = 1).

```

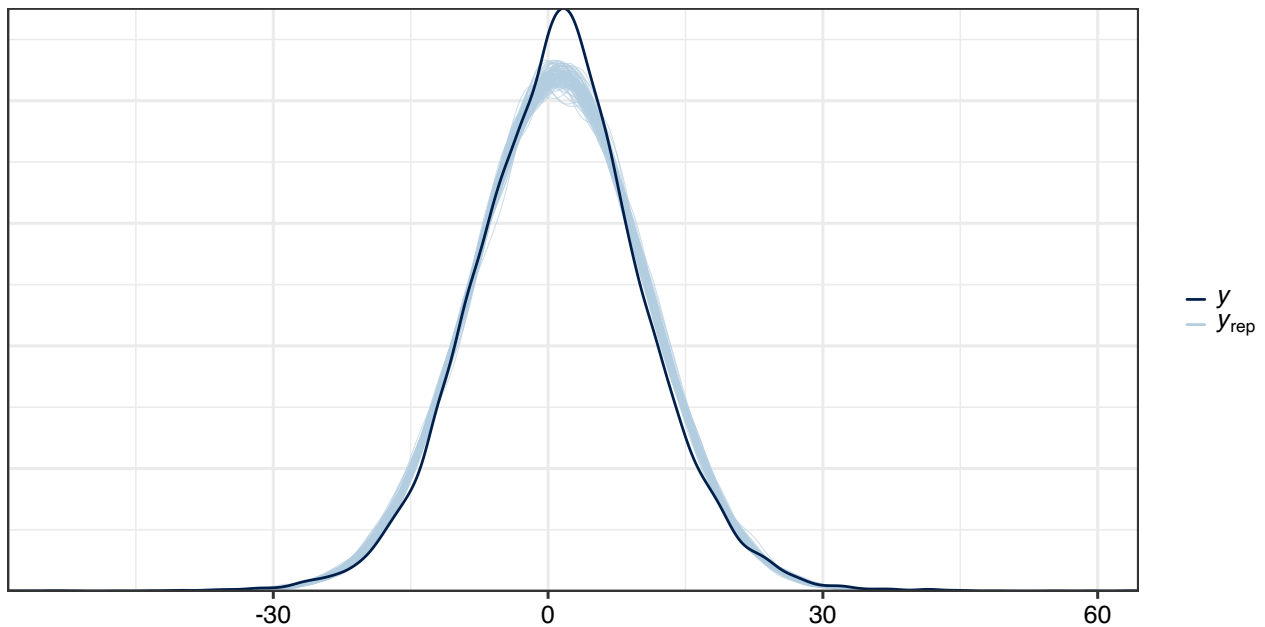

### S3.1.3 Agent preference and surprisal

LSTM-based surprisal:

```

if (!file.exists('../gams_fitted_models/gam_de_agent_lstm.RDS')){
  prior.brms <- c(
    prior(normal(0,1), class = b),
    prior(exponential(1), class = sigma)
  )
}

```



```

)
model.agent.surprisal.lstm <- brm(mV
  ~ 1
  + trial_number.Z
  + surprisal.lstm.Z
  + condition
  + t2(x, y, by = condition, k = 10)
  + t2(x, y, by = surprisal.lstm.Z, k = 10)
  + t2(x, y, Participant, bs = "re")
  + t2(x, y, Stimulus, bs = "re"),
  prior = prior.brms,
  sample_prior = TRUE,
  data = german.data,
  chains = 4, iter = 2000, cores = 4
)
saveRDS(model.agent.surprisal.lstm,
  './gams_fitted_models/gam_de_agent_lstm.RDS')
}
model.de.agent.surplstm <- readRDS('./gams_fitted_models/gam_de_agent_lstm.RDS')

summary(model.de.agent.surplstm)

```

```

## Family: gaussian
## Links: mu = identity; sigma = identity
## Formula: mV ~ 1 + trial_number.Z + surprisal.lstm.Z + condition + t2(x, y, by = condition, k = 10) +
## Data: german.data (Number of observations: 20961)
## Samples: 4 chains, each with iter = 2000; warmup = 1000; thin = 1;
## total post-warmup samples = 4000
##
## Smooth Terms:
##
## Estimate Est.Error 1-95% CI u-95% CI Rhat Bulk_ESS Tail_ESS
## sds(t2xyconditionAbias_1) 1.54 1.35 0.07 5.06 1.00 2058 2138
## sds(t2xyconditionAbias_2) 2.89 2.51 0.11 9.46 1.00 1805 2273
## sds(t2xyconditionAbias_3) 5.95 3.36 0.69 14.17 1.00 1068 695
## sds(t2xyconditionnonAbias_1) 1.10 1.01 0.03 3.83 1.00 2008 1992
## sds(t2xyconditionnonAbias_2) 2.95 2.59 0.10 9.48 1.00 1265 1468
## sds(t2xyconditionnonAbias_3) 5.64 2.68 1.58 11.99 1.00 1644 1247
## sds(t2xysurprisal.lstm.Z_1) 0.82 0.78 0.02 2.92 1.00 2316 1922
## sds(t2xysurprisal.lstm.Z_2) 1.79 1.66 0.06 6.32 1.00 1729 1640
## sds(t2xysurprisal.lstm.Z_3) 2.27 1.80 0.10 6.96 1.00 1657 1767
## sds(t2xyParticipant_1) 0.15 0.11 0.00 0.40 1.00 1708 1246
## sds(t2xyStimulus_1) 0.14 0.10 0.01 0.37 1.00 1810 1564
##
## Population-Level Effects:
## Estimate Est.Error 1-95% CI u-95% CI Rhat Bulk_ESS Tail_ESS
## Intercept 1.19 0.15 0.90 1.49 1.00 2510 2614
## trial_number.Z -0.56 0.07 -0.69 -0.43 1.00 5756 3375
## surprisal.lstm.Z -0.30 0.75 -1.77 1.20 1.00 2957 2673
## condition2 -0.13 0.19 -0.52 0.24 1.00 2134 2939
## t2xy:conditionAbias_1 0.16 0.19 -0.20 0.54 1.00 1871 2313
## t2xy:conditionAbias_2 0.07 0.15 -0.22 0.36 1.00 3818 2810
## t2xy:conditionAbias_3 0.04 0.19 -0.33 0.42 1.00 4194 3139
## t2xy:conditionnonAbias_1 0.50 0.16 0.19 0.80 1.00 2066 2064

```

```

## t2xy:conditionnonAbias_2    0.21    0.12   -0.03    0.45 1.00    2764    2613
## t2xy:conditionnonAbias_3    0.23    0.16   -0.09    0.56 1.00    3065    3088
## t2xy:surprisal.lstm.Z_1    -0.35    0.67   -1.70    0.97 1.00    2971    2643
## t2xy:surprisal.lstm.Z_2    -0.35    0.09   -0.55   -0.18 1.00    3741    2971
## t2xy:surprisal.lstm.Z_3     0.13    0.09   -0.04    0.31 1.00    4040    3125
## t2xy:surprisal.lstm.Z_4     0.09    0.11   -0.14    0.32 1.00    4190    3274
##
## Family Specific Parameters:
##      Estimate Est.Error l-95% CI u-95% CI Rhat Bulk_ESS Tail_ESS
## sigma      9.35      0.05   9.27   9.44 1.00   8444   2514
##
## Samples were drawn using sampling(NUTS). For each parameter, Bulk_ESS
## and Tail_ESS are effective sample size measures, and Rhat is the potential
## scale reduction factor on split chains (at convergence, Rhat = 1).

```

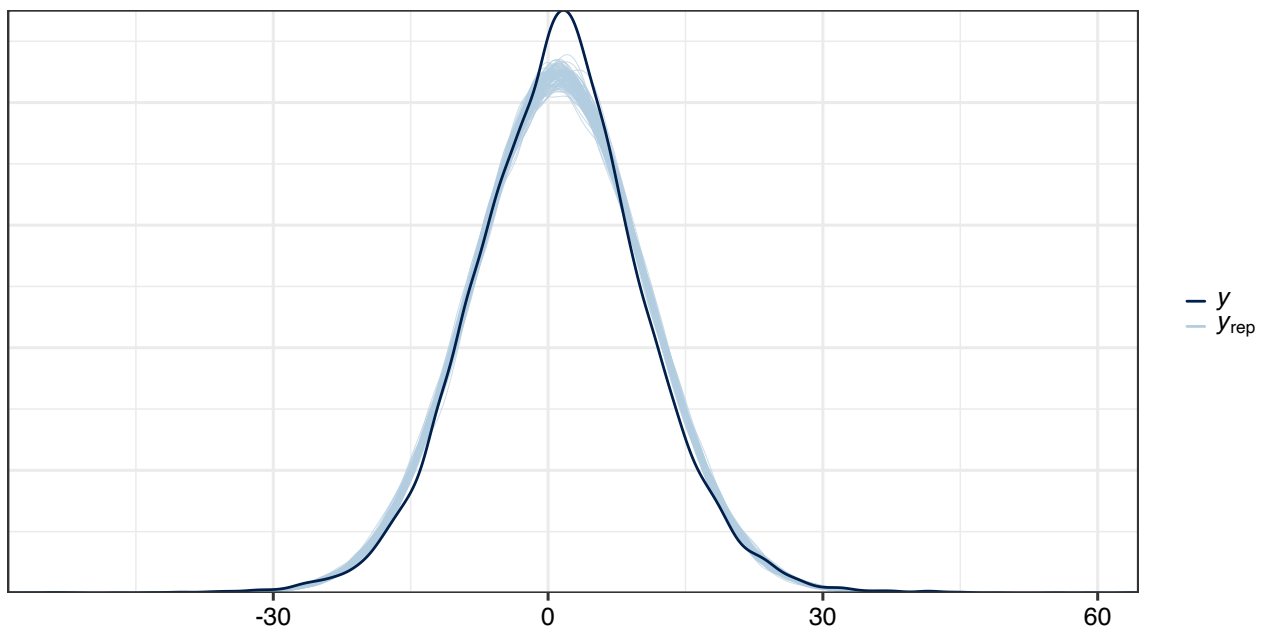

BERT-based surprisal:

```

if (!file.exists('../gams_fitted_models/gam_de_agent_bert.RDS')){
  prior.brms <- c(
    prior(normal(0,1), class = b),
    prior(exponential(1), class = sigma)
  )
  model.agent.surprisal.tr <- brm(mV
    ~ 1
    + trial_number.Z
    + surprisal.tr.Z
    + condition
    + t2(x, y, by = condition, k = 10)
    + t2(x, y, by = surprisal.tr.Z, k = 10)
    + t2(x, y, Participant, bs = "re")
    + t2(x, y, Stimulus, bs = "re"),
    prior = prior.brms,
    sample_prior = TRUE,
    data = german.data,

```

```

                                chains = 4, iter = 2000, cores = 4
)
saveRDS(model.agent.surprisal.lstm,
        '../gams_fitted_models/gam_de_agent_bert.RDS')
}
model.de.agent.surptr <- readRDS('../gams_fitted_models/gam_de_agent_bert.RDS')

summary(model.de.agent.surptr)

```

```

## Family: gaussian
## Links: mu = identity; sigma = identity
## Formula: mV ~ 1 + trial_number.Z + surprisal.tr.Z + condition + t2(x, y, by = condition, k = 10) + t
## Data: german.data (Number of observations: 20961)
## Samples: 4 chains, each with iter = 2000; warmup = 1000; thin = 1;
##          total post-warmup samples = 4000
##
## Smooth Terms:
##
##          Estimate Est.Error 1-95% CI u-95% CI Rhat Bulk_ESS Tail_ESS
## sds(t2xyconditionAbias_1)      1.58      1.41      0.06      5.27 1.00      2336      2199
## sds(t2xyconditionAbias_2)      2.91      2.51      0.10      9.39 1.00      1973      1670
## sds(t2xyconditionAbias_3)      5.94      3.31      1.00     14.11 1.00      1674      1274
## sds(t2xyconditionnonAbias_1)    1.13      1.04      0.04      3.92 1.00      2083      2291
## sds(t2xyconditionnonAbias_2)    3.06      2.63      0.12      9.67 1.00      1293      2111
## sds(t2xyconditionnonAbias_3)    5.78      2.70      1.60     12.19 1.00      2096      1899
## sds(t2xysurprisal.tr.Z_1)      0.92      0.81      0.03      3.06 1.00      2247      2164
## sds(t2xysurprisal.tr.Z_2)      1.68      1.51      0.05      5.55 1.00      2276      2131
## sds(t2xysurprisal.tr.Z_3)      2.01      1.74      0.08      6.52 1.00      1929      1975
## sds(t2xyParticipant_1)         0.14      0.11      0.01      0.40 1.00      1688      2144
## sds(t2xyStimulus_1)           0.14      0.10      0.01      0.39 1.00      2026      1977
##
## Population-Level Effects:
##
##          Estimate Est.Error 1-95% CI u-95% CI Rhat Bulk_ESS Tail_ESS
## Intercept          1.25      0.16      0.93      1.57 1.00      3040      2981
## trial_number.Z     -0.57      0.07     -0.71     -0.44 1.00      6925      3050
## surprisal.tr.Z     -0.17      0.75     -1.60      1.30 1.00      3233      3157
## condition2         -0.23      0.21     -0.64      0.17 1.00      2967      2984
## t2xy:conditionAbias_1      0.19      0.19     -0.16      0.59 1.00      2666      3101
## t2xy:conditionAbias_2      0.05      0.15     -0.25      0.35 1.00      3389      2628
## t2xy:conditionAbias_3      0.08      0.21     -0.32      0.48 1.00      4166      3506
## t2xy:conditionnonAbias_1    0.48      0.16      0.17      0.79 1.00      2368      2595
## t2xy:conditionnonAbias_2    0.22      0.12     -0.04      0.46 1.00      2614      2296
## t2xy:conditionnonAbias_3    0.21      0.17     -0.13      0.53 1.00      3765      3188
## t2xy:surprisal.tr.Z_1     -0.17      0.67     -1.49      1.13 1.00      3217      3185
## t2xy:surprisal.tr.Z_2     -0.17      0.10     -0.35      0.04 1.00      3395      2793
## t2xy:surprisal.tr.Z_3      0.08      0.09     -0.10      0.26 1.00      3570      2748
## t2xy:surprisal.tr.Z_4     -0.06      0.12     -0.29      0.18 1.00      4941      3404
##
## Family Specific Parameters:
##          Estimate Est.Error 1-95% CI u-95% CI Rhat Bulk_ESS Tail_ESS
## sigma      9.38      0.05      9.29      9.47 1.00     10208      2504
##
## Samples were drawn using sampling(NUTS). For each parameter, Bulk_ESS
## and Tail_ESS are effective sample size measures, and Rhat is the potential

```

```
## scale reduction factor on split chains (at convergence, Rhat = 1).
```

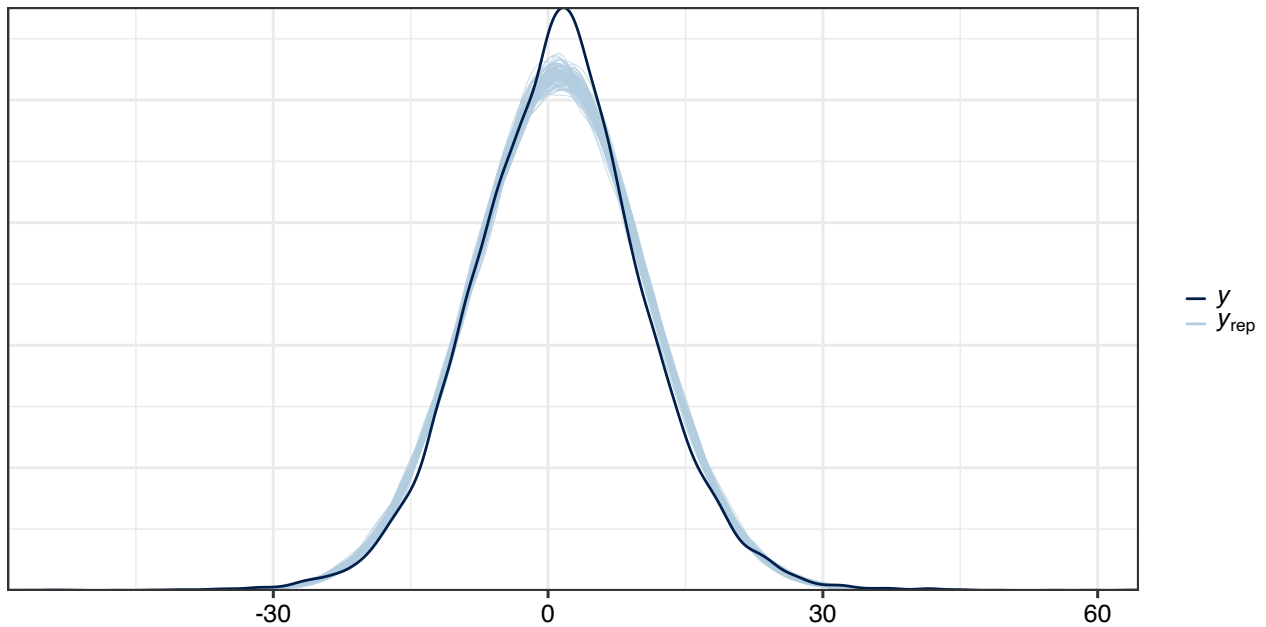

GPT-based surprisal

```
if (!file.exists('../gams_fitted_models/gam_de_agent_gpt.RDS')){
  prior.brms <- c(
    prior(normal(0,1), class = b),
    prior(exponential(1), class = sigma)
  )
  model.agent.surprisal.gpt <- brm(mV
    ~ 1
    + trial_number.Z
    + surprisal.gpt.Z
    + condition
    + t2(x, y, by = condition, k = 10)
    + t2(x, y, by = surprisal.gpt.Z, k = 10)
    + t2(x, y, Participant, bs = "re")
    + t2(x, y, Stimulus, bs = "re"),
    prior = prior.brms,
    sample_prior = TRUE,
    data = german.data,
    chains = 4, iter = 2000, cores = 4
  )
  saveRDS(model.agent.surprisal.gpt,
    '../gams_fitted_models/gam_de_agent_gpt.RDS')
}
model.de.agent.surpgpt <- readRDS('../gams_fitted_models/gam_de_agent_gpt.RDS')

summary(model.de.agent.surpgpt)
```

```
## Family: gaussian
## Links: mu = identity; sigma = identity
## Formula: mV ~ 1 + trial_number.Z + surprisal.gpt.Z + condition + t2(x, y, by = condition, k = 10) +
```

```

## Data: german.data (Number of observations: 20961)
## Samples: 4 chains, each with iter = 2000; warmup = 1000; thin = 1;
## total post-warmup samples = 4000
##
## Smooth Terms:
## Estimate Est.Error 1-95% CI u-95% CI Rhat Bulk_ESS Tail_ESS
## sds(t2xyconditionAbias_1) 1.48 1.35 0.05 5.05 1.00 2176 1894
## sds(t2xyconditionAbias_2) 2.89 2.60 0.08 9.53 1.00 1414 1579
## sds(t2xyconditionAbias_3) 5.88 3.36 0.70 13.87 1.00 1640 1127
## sds(t2xyconditionnonAbias_1) 1.12 1.05 0.04 3.88 1.00 2208 1809
## sds(t2xyconditionnonAbias_2) 2.98 2.55 0.11 9.23 1.00 1173 1907
## sds(t2xyconditionnonAbias_3) 5.79 2.87 1.30 12.85 1.00 1412 869
## sds(t2xysurprisal.gpt.Z_1) 0.89 0.87 0.03 3.17 1.00 2475 1649
## sds(t2xysurprisal.gpt.Z_2) 1.82 1.60 0.06 5.88 1.00 1911 1674
## sds(t2xysurprisal.gpt.Z_3) 2.00 1.81 0.07 6.84 1.00 2452 2116
## sds(t2xyParticipant_1) 0.15 0.11 0.01 0.41 1.00 1738 1824
## sds(t2xyStimulus_1) 0.14 0.11 0.00 0.39 1.00 1869 1385
##
## Population-Level Effects:
## Estimate Est.Error 1-95% CI u-95% CI Rhat Bulk_ESS Tail_ESS
## Intercept 1.42 0.17 1.08 1.76 1.00 2914 2670
## trial_number.Z -0.48 0.07 -0.62 -0.34 1.00 5452 2711
## surprisal.gpt.Z -0.20 0.74 -1.64 1.23 1.00 2979 3227
## condition2 -0.48 0.22 -0.93 -0.05 1.00 2908 2990
## t2xy:conditionAbias_1 0.20 0.19 -0.17 0.60 1.00 2223 2909
## t2xy:conditionAbias_2 0.03 0.16 -0.27 0.35 1.00 3401 2775
## t2xy:conditionAbias_3 0.10 0.21 -0.32 0.53 1.00 3480 2958
## t2xy:conditionnonAbias_1 0.47 0.16 0.16 0.81 1.00 1898 2712
## t2xy:conditionnonAbias_2 0.23 0.13 -0.02 0.47 1.00 3024 2754
## t2xy:conditionnonAbias_3 0.20 0.17 -0.14 0.52 1.00 3581 3234
## t2xy:surprisal.gpt.Z_1 -0.23 0.66 -1.53 1.05 1.00 2993 3131
## t2xy:surprisal.gpt.Z_2 -0.15 0.10 -0.34 0.06 1.00 2975 2861
## t2xy:surprisal.gpt.Z_3 0.09 0.10 -0.10 0.29 1.00 3128 3005
## t2xy:surprisal.gpt.Z_4 -0.07 0.13 -0.33 0.18 1.00 3743 2983
##
## Family Specific Parameters:
## Estimate Est.Error 1-95% CI u-95% CI Rhat Bulk_ESS Tail_ESS
## sigma 9.38 0.05 9.29 9.47 1.00 9439 2885
##
## Samples were drawn using sampling(NUTS). For each parameter, Bulk_ESS
## and Tail_ESS are effective sample size measures, and Rhat is the potential
## scale reduction factor on split chains (at convergence, Rhat = 1).

```

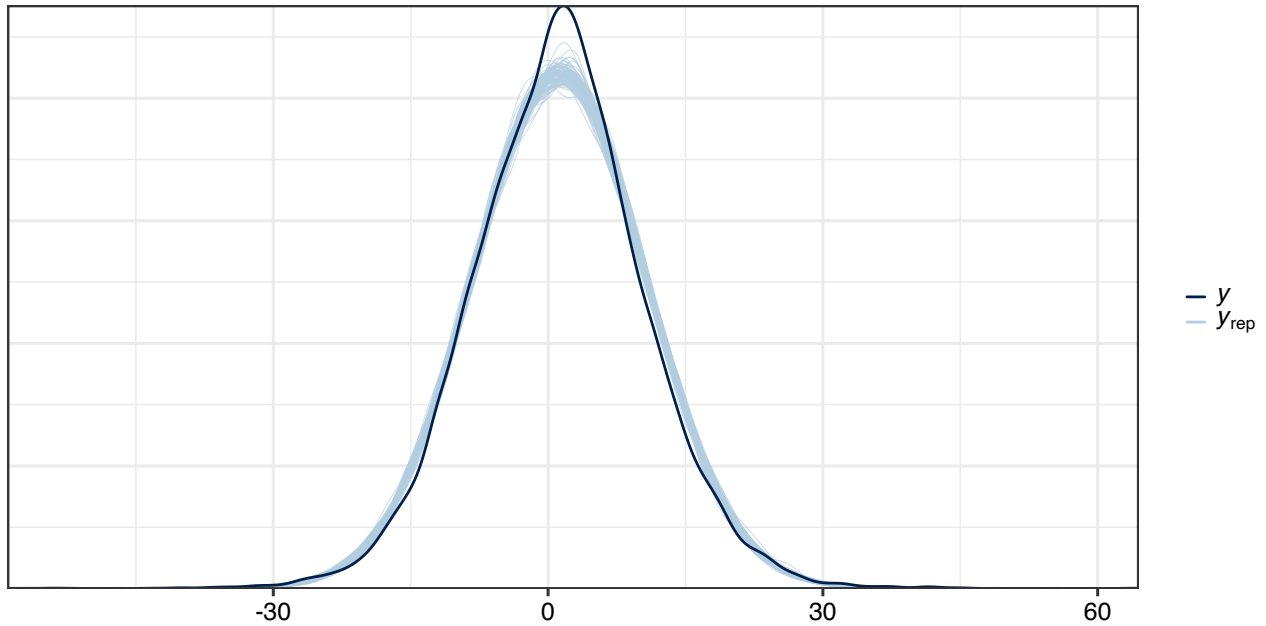

### S3.1.4 Null model

```

if (!file.exists('../gams_fitted_models/gam_de_null.RDS')){
  prior.brms <- c(
    prior(normal(0,1), class = b),
    prior(exponential(1), class = sigma)
  )
  model.null <- brm(mV
    ~ 1
    + trial_number.Z
    + t2(x, y, Participant, bs = "re")
    + t2(x, y, Stimulus, bs = "re"),
    prior = prior.brms,
    sample_prior = TRUE,
    data = german.data,
    chains = 4, iter = 2000, cores = 4
  )
  saveRDS(model.null, '../gams_fitted_models/gam_de_null.RDS')
}
model.de.null <- readRDS('../gams_fitted_models/gam_de_null.RDS')
summary(model.de.null)

```

```

## Family: gaussian
## Links: mu = identity; sigma = identity
## Formula: mV ~ 1 + trial_number.Z + t2(x, y, Participant, bs = "re") + t2(x, y, Stimulus, bs = "re")
## Data: german.data (Number of observations: 20961)
## Samples: 4 chains, each with iter = 2000; warmup = 1000; thin = 1;
##           total post-warmup samples = 4000
##
## Smooth Terms:
##           Estimate Est.Error 1-95% CI u-95% CI Rhat Bulk_ESS Tail_ESS

```

```

## sds(t2xyParticipant_1)    0.15    0.11    0.01    0.41 1.00    2126    2196
## sds(t2xyStimulus_1)     0.14    0.10    0.01    0.39 1.00    2274    2290
##
## Population-Level Effects:
##           Estimate Est.Error 1-95% CI u-95% CI Rhat Bulk_ESS Tail_ESS
## Intercept           1.19    0.07    1.06    1.31 1.00    8112    3016
## trial_number.Z     -0.61    0.07   -0.74   -0.48 1.00    6337    2926
##
## Family Specific Parameters:
##           Estimate Est.Error 1-95% CI u-95% CI Rhat Bulk_ESS Tail_ESS
## sigma           9.40    0.05    9.30    9.49 1.00    8667    2523
##
## Samples were drawn using sampling(NUTS). For each parameter, Bulk_ESS
## and Tail_ESS are effective sample size measures, and Rhat is the potential
## scale reduction factor on split chains (at convergence, Rhat = 1).

```

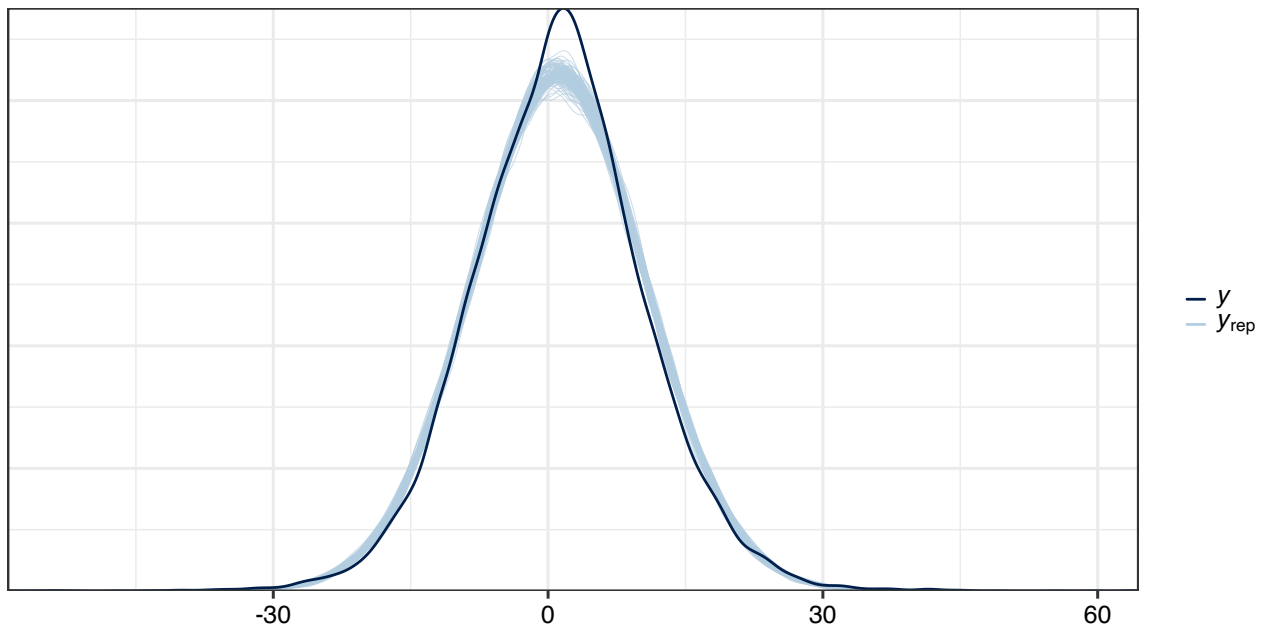

## S3.2 Model comparison with stacking

Here we perform model comparison and report the results:

```

if (!file.exists('../temp_data/weights_brms_german_stacking.RDS')){
  loo.agent <- loo(model.de.agent)#, moment_match = T)
  loo.surplstm <- loo(model.de.surplstm)#, moment_match = T)
  loo.surptr <- loo(model.de.surptr)#, moment_match = T)
  loo.surpgpt <- loo(model.de.surpgpt)
  loo.agent.surplstm <- loo(model.de.agent.surplstm)#, moment_match = T)
  loo.agent.surptr <- loo(model.de.agent.surptr)#, moment_match = T)
  loo.agent.surpgpt <- loo(model.de.agent.surpgpt)#, moment_match = T)
  loo.null <- loo(model.de.null)#, moment_match = T)
  lweights <- loo_model_weights(list(
    "agent bias only"= loo.agent,
    "surprisal lstm" = loo.surplstm,

```

```

"surprisal bert" = loo.surptr,
"surprisal lstm and agent bias" = loo.agent.surplstm,
"surprisal bert and agent bias" = loo.agent.surptr,
>null" = loo.null,
"surprisal gpt" = loo.surpgpt,
"surprisal gpt and agent bias" = loo.agent.surpgpt
))
dfweights <- as.data.frame(as.matrix(lweights))
saveRDS(dfweights, '../temp_data/weights_brms_german_stacking.RDS')
}

```

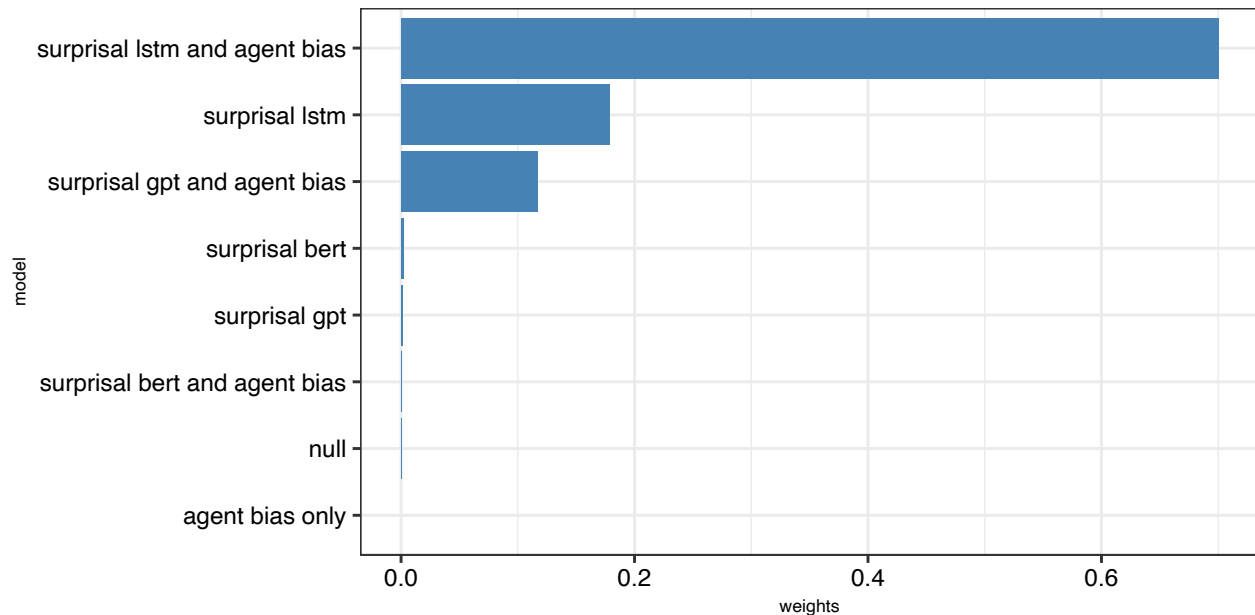

### S3.3 Model predictions

In what follows we compute and plot the mean posterior predicted effects across the smoothed scalp surfaces. In each plot, the left-hand side shows the difference between conditions. For surprisal we plot the difference between predictions at +2 and at -2 standard deviations from the mean. Panels on the right-hand side quantify the evidence of the effect in terms of the proportion of the posterior distributions that is below or above 0.

#### S3.3.1 Agent preference alone

```

n_samps <- 4000
newdata.agent.de <- expand_grid(
  x = seq(min(german.data$x), max(german.data$x), length.out = 30),
  y = seq(min(german.data$y), max(german.data$y), length.out = 30),
  Participant = "01ax",
  Stimulus_Cond = c("1-3:3_Abias", "15-2:2_nonAbias"),
  trial_number.Z = 0,
)

```



```

newdata.agent.de <- newdata.agent.de %>%
  separate(Stimulus_Cond, c('Stimulus', 'condition'), sep='_')

preds.agent.de <- posterior_epred(model.de.agent,
                                newdata=newdata.agent.de, re.form=NA)

preds.agent.de_long <- as.data.frame(preds.agent.de) %>%
  mutate(samp = 1:nrow(preds.agent.de)) %>%
  pivot_longer(-samp)

preds.agent.de_long$x <- rep(newdata.agent.de$x, n_samps)
preds.agent.de_long$y <- rep(newdata.agent.de$y, n_samps)
preds.agent.de_long$condition <- rep(newdata.agent.de$condition, n_samps)

preds.agent.de_long$x <- (-(preds.agent.de_long$x))

preds.agent.de_summary <- preds.agent.de_long %>%
  group_by(x,y,samp) %>%
  mutate(diff_cond = value[condition == 'Abias'] -
          value[condition == 'nonAbias']) %>%
  ungroup() %>%
  group_by(x,y) %>%
  summarise(PP =
            ifelse(mean(diff_cond) > 0, mean(diff_cond > 0),
                  mean(diff_cond < 0)),
            mean_diff = mean(diff_cond))

plot.agent.de <- preds.agent.de_summary %>%
  mutate(sig = ifelse(PP>0.80, 1, 0)) %>%
  ggplot(aes(x=x, y=y, fill=mean_diff, alpha = sig)) +
  geom_tile()+
  scale_fill_gradient2(low = '#0053d3', high = '#b22709', midpoint=0,
                      aesthetics='fill')+
  labs(fill=(expression(paste(Delta, paste(mu, "V")))),
        x=element_blank(),
        y=element_blank()) +
  guides(alpha = "none") +
  theme(panel.grid = element_blank(), panel.border = element_blank(),
        strip.background = element_blank(),strip.text.x = element_text(size=5),
        axis.text.y=element_blank(),
        axis.text.x = element_blank(),
        axis.ticks.y=element_blank(),
        axis.ticks.x=element_blank(),
        plot.background = element_rect(fill = "transparent", colour = NA))

plot.agent.de.pp <- preds.agent.de_summary %>%
  ggplot(aes(x=x, y=y, fill=PP)) +
  geom_tile()+
  scale_fill_gradientn(colours = c('white','grey', 'black'),limits = c(0.8, 1),
                      na.value='white' ) +
  labs(fill=(expression(paste('P(|',Delta,mu, V, '| > 0)', ))),
        x='electrode coordinate x',
        y='electrode coordinate y') +

```

```

theme(panel.grid = element_blank(),
      panel.border = element_blank(),
      strip.background = element_blank(),
      axis.ticks.x = element_blank(),
      axis.ticks.y=element_blank(),
      axis.text.x=element_blank(),
      axis.text.y = element_blank(),
      plot.background = element_rect(fill = "transparent", colour = NA),
      title = element_blank())

```

```
wrap_plots(list(plot.agent.de, plot.agent.de.pp))
```

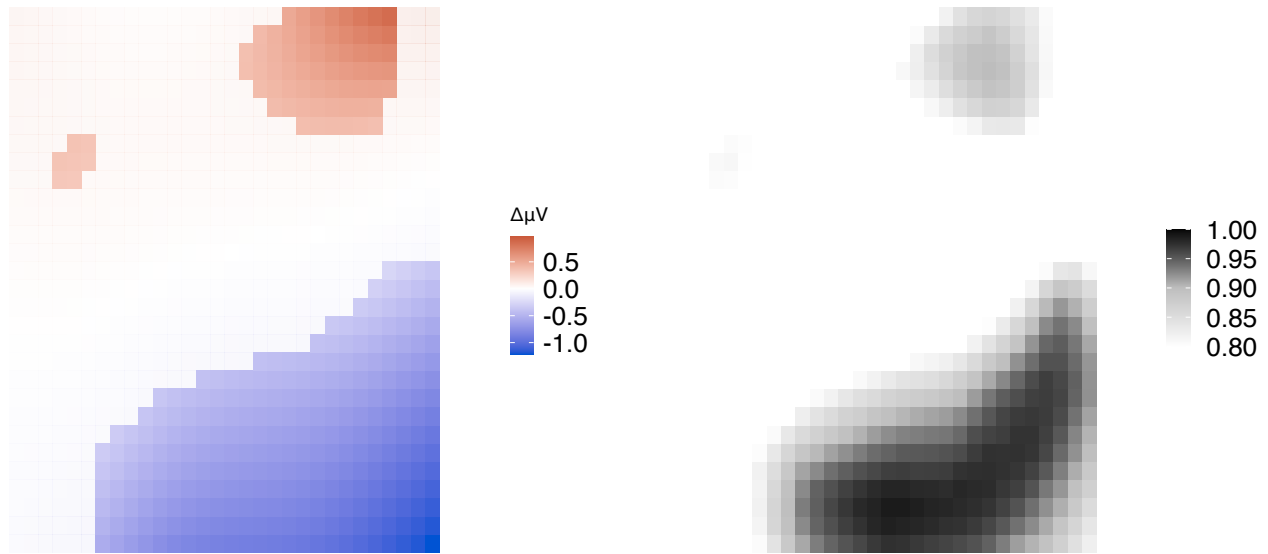

Figure S1: Left: Pair-wise fitted differences of micro-volt for sentences with vs. sentences without the predicted reanalysis from model with agent preference predictor alone. Right: Percentage of posterior probability mass of micro-volt mean difference below or above 0.

### S3.3.2 LSTM-based surprisal alone

```

newdata.de.surplstm <- expand_grid(
  x = seq(min(german.data$x), max(german.data$x), length.out = 30),
  y = seq(min(german.data$y), max(german.data$y), length.out = 30),
  surprisal.lstm.Z = seq(from=-2, to=2, length.out=17),
  Participant = "01ax",
  Stimulus = c("1-3:3"),
  trial_number.Z = 0,
)

preds.de.surplstm <- posterior_epred(model.de.surplstm,
                                   newdata=newdata.de.surplstm , re.form=NA)
preds.de.surplstm_long <- as.data.frame(preds.de.surplstm) %>%
  mutate(samp = 1:nrow(preds.de.surplstm)) %>%
  pivot_longer(-samp)

```

```

preds.de.surplstm_long$x <- rep(newdata.de.surplstm$x, n_samps)
preds.de.surplstm_long$y <- rep(newdata.de.surplstm$y, n_samps)
preds.de.surplstm_long$surprisal <- rep(newdata.de.surplstm$surprisal.lstm.Z,
                                         n_samps)

summary_de_surplstm <- preds.de.surplstm_long %>%
  group_by(x,y,samp) %>%
  mutate(diff_surprisal = value[surprisal == 2] - value[surprisal == -2]) %>%
  ungroup() %>%
  group_by(x,y) %>%
  summarise(PP = ifelse(mean(diff_surprisal) > 0, mean(diff_surprisal > 0),
                      mean(diff_surprisal < 0)),
            mean_diff = mean(diff_surprisal)) %>%
  mutate(x = -x)

plot.lstm.de <- summary_de_surplstm %>%
  mutate(sig = ifelse(PP>0.80, 1, 0)) %>%
  ggplot(aes(x=x, y=y, fill=mean_diff, alpha = sig)) +
  geom_tile()+
  scale_fill_gradient2(low = '#0053d3', high = '#b22709', midpoint=0,
                      aesthetics='fill')+
  labs(fill=(expression(paste(Delta, paste(mu, "V")))),
       x=element_blank(),
       y=element_blank()) +
  guides(alpha = "none") +
  theme(panel.grid = element_blank(), panel.border = element_blank(),
        strip.background = element_blank(),strip.text.x = element_text(size=5),
        axis.text.y=element_blank(),
        axis.text.x = element_blank(),
        axis.ticks.y=element_blank(),
        axis.ticks.x=element_blank(),
        plot.background = element_rect(fill = "transparent", colour = NA))

plot.lstm.de.pp <- summary_de_surplstm %>%
  ggplot(aes(x=x, y=y, fill=PP)) +
  geom_tile()+
  scale_fill_gradientn(colours = c('white','grey', 'black'),limits = c(0.8, 1),
                      na.value='white' ) +
  labs(fill=(expression(paste('P(|',Delta,mu, V, '| > 0)', ))),
       x=element_blank(),
       y=element_blank()) +
  theme(panel.grid = element_blank(), panel.border = element_blank(),
        strip.background = element_blank(),strip.text.x = element_text(size=5),
        axis.text.y=element_blank(),
        axis.ticks.y=element_blank(),
        plot.background = element_rect(fill = "transparent", colour = NA))

wrap_plots(list(plot.lstm.de, plot.lstm.de.pp))

```

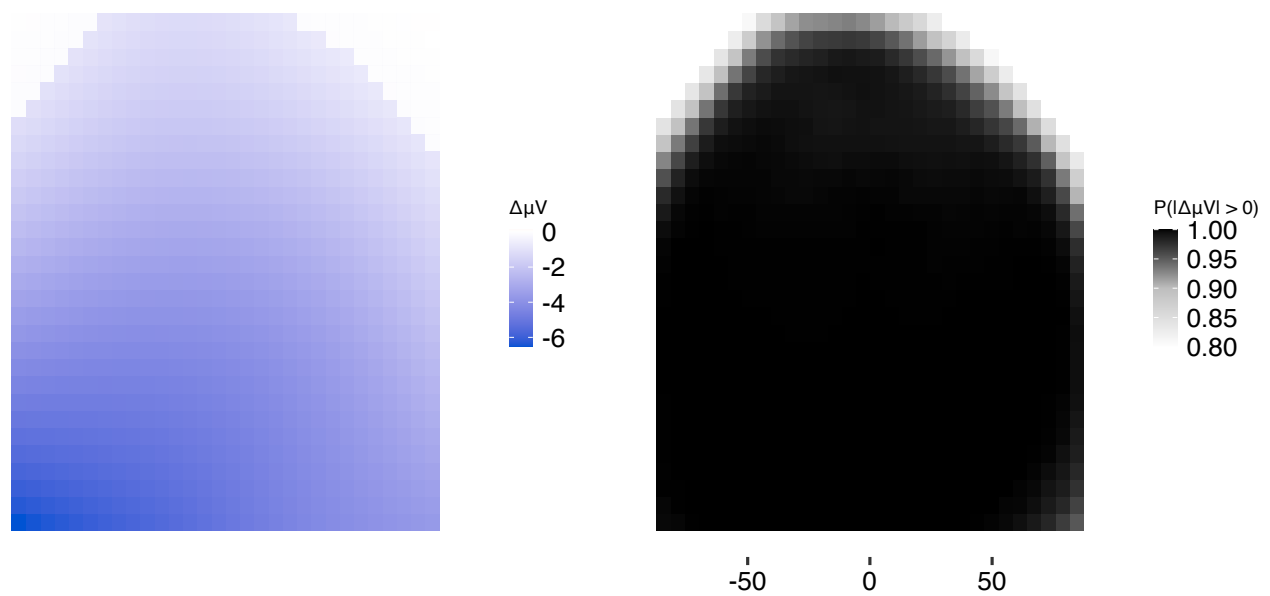

Figure S2: Left: Pair-wise fitted differences of micro-volt for sentences with high vs. sentences with low (+2 vs. -2 std. dev. from the mean) from model with LSTM surprisal as predictor alone. Right: Percentage of posterior probability mass of micro-volt mean difference below or above 0.

### S3.3.3 BERT-based surprisal alone

```

newdata.de.surptr <- dplyr::rename(newdata.de.surplstm,
                                  surprisal.tr.Z = surprisal.lstm.Z)
preds.de.surptr <- posterior_epred(model.de.surptr,
                                   newdata=newdata.de.surptr, re.form=NA)
preds.de.surptr_long <- as.data.frame(preds.de.surptr) %>%
  mutate(samp = 1:nrow(preds.de.surptr)) %>%
  pivot_longer(-samp)

preds.de.surptr_long$x <- rep(newdata.de.surptr$x, n_samps)
preds.de.surptr_long$y <- rep(newdata.de.surptr$y, n_samps)
preds.de.surptr_long$surprisal <- rep(newdata.de.surptr$surprisal.tr.Z, n_samps)

summary_de_surptr <- preds.de.surptr_long %>%
  group_by(x,y,samp) %>%
  mutate(diff_surprisal_low_mean = value[surprisal == 2] -
         value[surprisal == -2]) %>%
  ungroup() %>%
  group_by(x,y) %>%
  summarise(PP = ifelse(mean(diff_surprisal_low_mean) > 0,
                        mean(diff_surprisal_low_mean > 0),
                        mean(diff_surprisal_low_mean < 0)),
            mean_diff = mean(diff_surprisal_low_mean)) %>%
  mutate(x = -x)

plot.tr.de <- summary_de_surptr %>%
  mutate(sig = ifelse(PP>0.80, 1, 0)) %>%
  ggplot(aes(x=x, y=y, fill=mean_diff, alpha = sig)) +

```

```

geom_tile()+
scale_fill_gradient2(low = '#0053d3', high = '#b22709', midpoint=0,
                    aesthetics='fill')+
labs(fill=(expression(paste(Delta, paste(mu, "V")))),
     x=element_blank(),
     y=element_blank()) +
guides(alpha = "none") +
theme(panel.grid = element_blank(), panel.border = element_blank(),
      strip.background = element_blank(),strip.text.x = element_text(size=5),
      axis.text.y=element_blank(),
      axis.text.x = element_blank(),
      axis.ticks.y=element_blank(),
      axis.ticks.x=element_blank(),
      plot.background = element_rect(fill = "transparent", colour = NA))

plot.tr.de.pp <- summary_de_surptr %>%
ggplot(aes(x=x, y=y, fill=PP)) +
geom_tile()+
scale_fill_gradientn(colours = c('white','grey', 'black'),limits = c(0.8, 1),
                    na.value='white' ) +
labs(fill=(expression(paste('P(|',Delta,mu, V, '| > 0)', ))),
     x=element_blank(),
     y=element_blank()) +
theme(panel.grid = element_blank(), panel.border = element_blank(),
      strip.background = element_blank(),strip.text.x = element_text(size=5),
      axis.text.y=element_blank(),
      axis.ticks.y=element_blank(),
      plot.background = element_rect(fill = "transparent", colour = NA))

wrap_plots(list(plot.tr.de, plot.tr.de.pp))

```

### S3.3.4 GPT-based surprisal alone

```

newdata.de.surpgpt <- dplyr::rename(newdata.de.surplstm,
                                   surprisal.gpt.Z = surprisal.lstm.Z)
preds.de.surpgpt <- posterior_epred(model.de.surpgpt,
                                   newdata=newdata.de.surpgpt, re.form=NA)
preds.de.surpgpt_long <- as.data.frame(preds.de.surpgpt) %>%
  mutate(samp = 1:nrow(preds.de.surpgpt)) %>%
  pivot_longer(-samp)

preds.de.surpgpt_long$x <- rep(newdata.de.surpgpt$x, n_samps)
preds.de.surpgpt_long$y <- rep(newdata.de.surpgpt$y, n_samps)
preds.de.surpgpt_long$surprisal <- rep(newdata.de.surpgpt$surprisal.gpt.Z, n_samps)

summary_de_surpgpt <- preds.de.surpgpt_long %>%
  group_by(x,y,samp) %>%
  mutate(diff_surprisal_low_mean = value[surprisal == 2] -
         value[surprisal == -2]) %>%
  ungroup() %>%

```

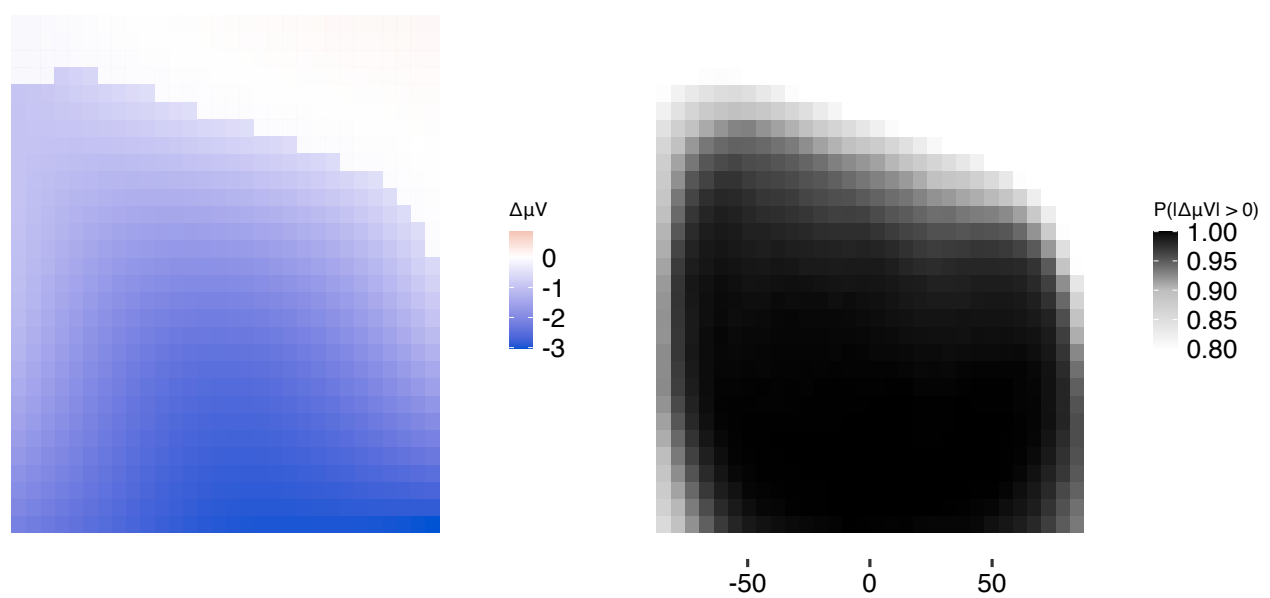

Figure S3: Left: Pair-wise fitted differences of micro-volt for sentences with high vs. sentences with low (+2 vs. -2 std. dev. from the mean) from model with BERT surprisal as predictor alone. Right: Percentage of posterior probability mass of micro-volt mean difference below or above 0.

```

group_by(x,y) %>%
  summarise(PP = ifelse(mean(diff_surprisal_low_mean) > 0,
                        mean(diff_surprisal_low_mean > 0),
                        mean(diff_surprisal_low_mean < 0)),
            mean_diff = mean(diff_surprisal_low_mean)) %>%
  mutate(x = -x)

plot.gpt.de <- summary_de_surpgpt %>%
  mutate(sig = ifelse(PP>0.80, 1, 0)) %>%
  ggplot(aes(x=x, y=y, fill=mean_diff, alpha = sig)) +
  geom_tile()+
  scale_fill_gradient2(low = '#0053d3', high = '#b22709', midpoint=0,
                      aesthetics='fill')+
  labs(fill=(expression(paste(Delta, paste(mu, "V")))),
       x=element_blank(),
       y=element_blank()) +
  guides(alpha = "none") +
  theme(panel.grid = element_blank(), panel.border = element_blank(),
        strip.background = element_blank(), strip.text.x = element_text(size=5),
        axis.text.y=element_blank(),
        axis.text.x = element_blank(),
        axis.ticks.y=element_blank(),
        axis.ticks.x=element_blank(),
        plot.background = element_rect(fill = "transparent", colour = NA))

plot.gpt.de.pp <- summary_de_surpgpt %>%
  ggplot(aes(x=x, y=y, fill=PP)) +
  geom_tile()+
  scale_fill_gradientn(colours = c('white','grey', 'black'),limits = c(0.8, 1),
                      na.value='white' ) +

```

```

labs(fill=(expression(paste('P(|',Delta,mu, V, '| > 0)', )),
      x=element_blank(),
      y=element_blank()) +
theme(panel.grid = element_blank(), panel.border = element_blank(),
      strip.background = element_blank(),strip.text.x = element_text(size=5),
      axis.text.y=element_blank(),
      axis.ticks.y=element_blank(),
      plot.background = element_rect(fill = "transparent", colour = NA))

```

```
wrap_plots(list(plot.gpt.de, plot.gpt.de.pp))
```

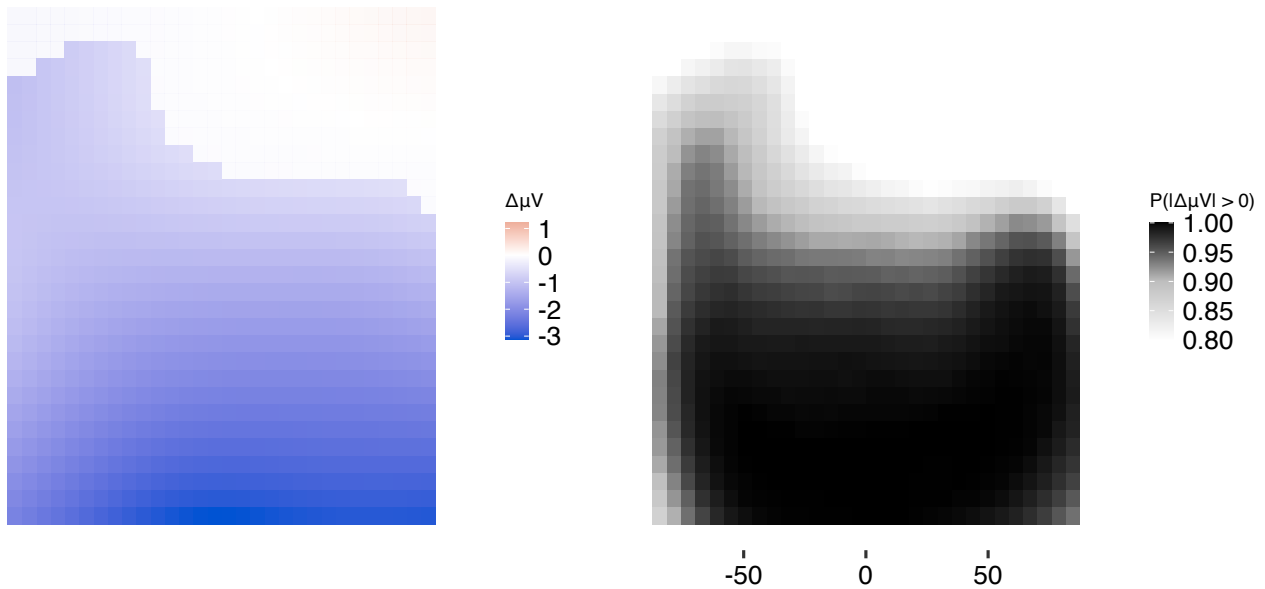

Figure S4: Left: Pair-wise fitted differences of micro-volt for sentences with high vs. sentences with low (+2 vs. -2 std. dev. from the mean) from model with GPT-2 surprisal as predictor alone. Right: Percentage of posterior probability mass of micro-volt mean difference below or above 0.

### S3.3.5 LSTM-based surprisal and Agent Preference

```

n_samps <- 4000
newdata.de.agent.surplstm <- expand_grid(
  x = seq(min(german.data$x), max(german.data$x), length.out = 30),
  y = seq(min(german.data$y), max(german.data$y), length.out = 30),
  surprisal.lstm.Z = seq(from=-2,to=2, length.out=17),
  Participant = "01ax",
  Stimulus_Cond = c("1-3:3_Abias", "15-2:2_nonAbias"),
  trial_number.Z = 0,
)

newdata.de.agent.surplstm <- newdata.de.agent.surplstm %>%
  separate(Stimulus_Cond, c('Stimulus', 'condition'), sep='_')

```

```

preds.de.agent.surplstm <- posterior_epred(model.de.agent.surplstm,
                                         newdata=newdata.de.agent.surplstm,
                                         re.form=NA)

preds.de.agent.surplstm_long <- as.data.frame(preds.de.agent.surplstm) %>%
  mutate(samp = 1:nrow(preds.de.agent.surplstm)) %>%
  pivot_longer(-samp)

preds.de.agent.surplstm_long$x <-
  rep(newdata.de.agent.surplstm$x, n_samps)
preds.de.agent.surplstm_long$y <-
  rep(newdata.de.agent.surplstm$y, n_samps)
preds.de.agent.surplstm_long$surprisal <-
  rep(newdata.de.agent.surplstm$surprisal.lstm.Z, n_samps)
preds.de.agent.surplstm_long$condition <-
  rep(newdata.de.agent.surplstm$condition, n_samps)

summary_de_agent_surplstm <- preds.de.agent.surplstm_long %>%
  filter(condition %in% 'Abias') %>%
  group_by(x,y,samp) %>%
  mutate(diff_surprisal_low_mean = value[surprisal == 2] -
         value[surprisal == -2]) %>%
  ungroup() %>%
  group_by(x,y) %>%
  summarise(PP = ifelse(mean(diff_surprisal_low_mean) > 0,
                       mean(diff_surprisal_low_mean > 0),
                       mean(diff_surprisal_low_mean < 0)),
           mean_diff = mean(diff_surprisal_low_mean)) %>%
  mutate(condition = 'Abias') %>%
  mutate(x = -x)

plot.lstm.agent.surp.de <- summary_de_agent_surplstm %>%
  mutate(sig = ifelse(PP>0.80, 1, 0)) %>%
  ggplot(aes(x=x, y=y, fill=mean_diff, alpha = sig)) +
  geom_tile()+
  scale_fill_gradient2(low = '#0053d3', high = '#b22709', midpoint=0, aesthetics='fill')+
  guides(alpha = "none") +
  labs(fill=(expression(paste(Delta, paste(mu, "V")))),
       x=element_blank(),
       y=element_blank()) +
  theme(panel.grid = element_blank(), panel.border = element_blank(),
        strip.background = element_blank(),strip.text.x = element_text(size=5),
        axis.text.y=element_blank(),
        axis.text.x=element_blank(),
        axis.ticks.y=element_blank(),
        axis.ticks.x=element_blank(),
        plot.background = element_rect(fill = "transparent", colour = NA))

plot.lstm.agent.surp.de.pp <- summary_de_agent_surplstm %>%
  ggplot(aes(x=x, y=y, fill=PP)) +
  geom_tile()+
  scale_fill_gradientn(colours = c('white','grey', 'black'),limits = c(0.8, 1),
                      na.value='white' ) +

```



```

labs(fill=(expression(paste('P(|',Delta,mu, V, '| > 0)', ))),
      x=element_blank(),
      y=element_blank()) +
theme(panel.grid = element_blank(), panel.border = element_blank(),
      strip.background = element_blank(),strip.text.x = element_text(size=5),
      axis.text.y=element_blank(),
      axis.text.x=element_blank(),
      axis.ticks.y=element_blank(),
      axis.ticks.x=element_blank(),
      plot.background = element_rect(fill = "transparent", colour = NA))

summary_de_agent_surplstm.conds <- preds.de.agent.surplstm_long %>%
  filter(surprisal == 0) %>%
  group_by(x,y,samp) %>%
  mutate(diff_condition = value[condition == 'Abias'] -
         value[condition == 'nonAbias']) %>%
  ungroup() %>%
  group_by(x,y) %>%
  summarise(PP = ifelse(mean(diff_condition) > 0,
                      mean(diff_condition > 0),
                      mean(diff_condition < 0)),
           mean_diff = mean(diff_condition)) %>%
  mutate(x = -x)

plot.lstm.agent.de.cond <- summary_de_agent_surplstm.conds %>%
  mutate(sig = ifelse(PP>0.80, 1, 0)) %>%
  ggplot(aes(x=x, y=y, fill=mean_diff, alpha = sig)) +
  geom_tile()+
  scale_fill_gradient2(low = '#0053d3', high = '#b22709', midpoint=0,
                      aesthetics='fill')+
  labs(fill=(expression(paste(Delta, paste(mu, "V")))),
      x=element_blank(),
      y=element_blank()) +
  guides(alpha = "none") +
  theme(panel.grid = element_blank(), panel.border = element_blank(),
      strip.background = element_blank(),strip.text.x = element_text(size=5),
      axis.text.y=element_blank(),
      axis.text.x = element_blank(),
      axis.ticks.y=element_blank(),
      axis.ticks.x=element_blank(),
      plot.background = element_rect(fill = "transparent", colour = NA))

plot.lstm.agent.de.cond.pp <- summary_de_agent_surplstm.conds %>%
  ggplot(aes(x=x, y=y, fill=PP)) +
  geom_tile()+
  scale_fill_gradientn(colours = c('white','grey', 'black'),limits = c(0.8, 1),
                      na.value='white' ) +
  labs(fill=(expression(paste('P(|',Delta,mu, V, '| > 0)', ))),
      x=element_blank(),
      y=element_blank()) +
  guides(alpha = "none") +
  theme(panel.grid = element_blank(), panel.border = element_blank(),
      strip.background = element_blank(),strip.text.x = element_text(size=5),

```

```
axis.text.y=element_blank(),
axis.text.x=element_blank(),
axis.ticks.x=element_blank(),
axis.ticks.y=element_blank(),
plot.background = element_rect(fill = "transparent", colour = NA))
```

```
# pdf('../plots/german_fitted_plot.pdf', width=10, height=7.5)
wrap_plots(list(plot.lstm.agent.de.cond, plot.lstm.agent.surp.de,
                plot.lstm.agent.de.cond.pp, plot.lstm.agent.surp.de.pp))
```

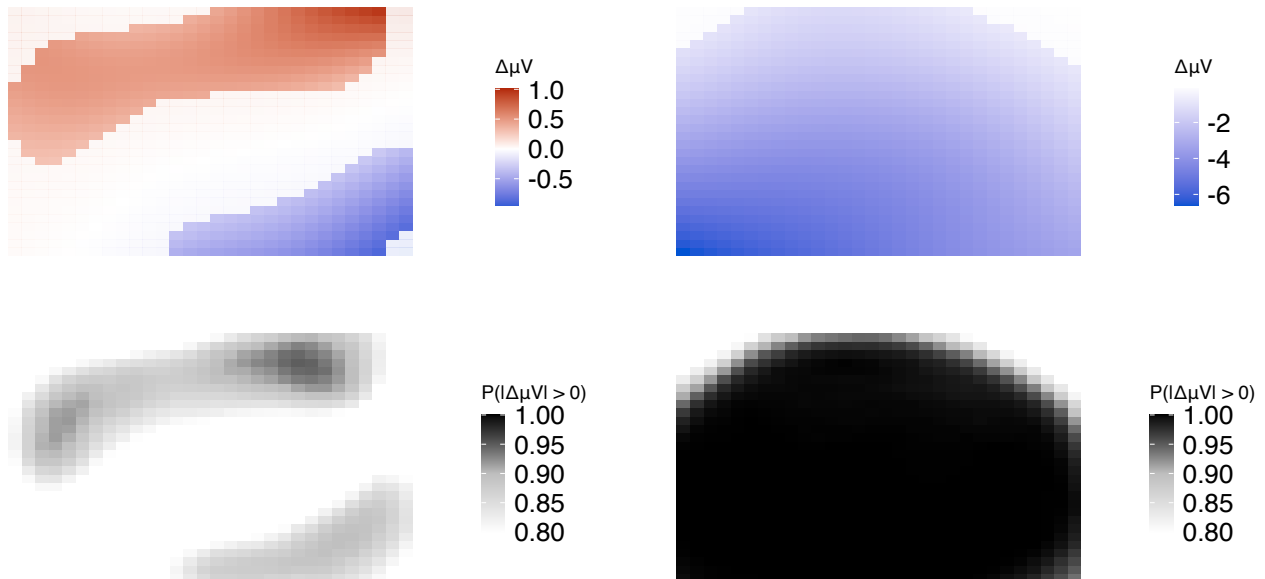

Figure S5: Left: Pair-wise fitted differences of micro-volt for sentences with vs. sentences without the predicted reanalysis from model with LSTM surprisal as well as agent preference predictor. Right: Percentage of posterior probability mass of micro-volt mean difference below or above 0.

```
# dev.off()
```

### S3.3.6 BERT-based surprisal and Agent Preference

```
newdata.de.agent.surptr <- newdata.de.agent.surplstm %>%
  dplyr::rename(surprisal.tr.Z = surprisal.lstm.Z)
preds.de.agent.surptr <- posterior_epred(model.de.agent.surptr,
                                       newdata=newdata.de.agent.surptr,
                                       re.form=NA)

preds.de.agent.surptr_long <- as.data.frame(preds.de.agent.surptr) %>%
  mutate(samp = 1:nrow(preds.de.agent.surptr)) %>%
  pivot_longer(-samp)

preds.de.agent.surptr_long$x <- rep(newdata.de.agent.surptr$x, n_samps)
preds.de.agent.surptr_long$y <- rep(newdata.de.agent.surptr$y, n_samps)
preds.de.agent.surptr_long$surprisal <- rep(newdata.de.agent.surptr$surprisal.tr.Z,
```

```

                                n_samps)
preds.de.agent.surptr_long$condition <- rep(newdata.de.agent.surptr$condition,
                                n_samps)

summary_de_agent_surptr.abias <- preds.de.agent.surptr_long %>%
  filter(condition %in% 'Abias') %>%
  group_by(x,y,samp) %>%
  mutate(diff_surprisal_low_mean = value[surprisal == 2] -
         value[surprisal == -2]) %>%
  ungroup() %>%
  group_by(x,y) %>%
  summarise(PP = ifelse(mean(diff_surprisal_low_mean) > 0,
                       mean(diff_surprisal_low_mean > 0),
                       mean(diff_surprisal_low_mean < 0)),
           mean_diff = mean(diff_surprisal_low_mean)) %>%
  mutate('condition' = 'Abias')

summary_de_agent_surptr.nonabias <- preds.de.agent.surptr_long %>%
  filter(condition %in% 'Abias') %>%
  group_by(x,y,samp) %>%
  mutate(diff_surprisal_low_mean = value[surprisal == 2] -
         value[surprisal == -2]) %>%
  ungroup() %>%
  group_by(x,y) %>%
  summarise(PP = ifelse(mean(diff_surprisal_low_mean) > 0,
                       mean(diff_surprisal_low_mean > 0),
                       mean(diff_surprisal_low_mean < 0)),
           mean_diff = mean(diff_surprisal_low_mean)) %>%
  mutate('condition' = 'nonAbias')

summary_de_agent_surptr <- rbind(summary_de_agent_surptr.nonabias,
                                summary_de_agent_surptr.abias) %>%
  mutate(x = -x)

plot.tr.agent.surp.de <- summary_de_agent_surptr %>%
  ggplot(aes(x=x, y=y, fill=mean_diff, alpha = PP)) +
  geom_tile() +
  scale_fill_gradient2(low = '#0053d3', high = '#b22709', midpoint=0,
                      aesthetics='fill') +
  labs(fill=(expression(paste(Delta, paste(mu, "V")))),
       x=element_blank(),
       y=element_blank()) +
  guides(alpha = "none") +
  theme(panel.grid = element_blank(), panel.border = element_blank(),
        strip.background = element_blank(),strip.text.x = element_text(size=5),
        axis.text.y=element_blank(),
        axis.text.x = element_blank(),
        axis.ticks.y=element_blank(),
        axis.ticks.x=element_blank(),
        plot.background = element_rect(fill = "transparent", colour = NA))

plot.tr.agent.surp.de.pp <- summary_de_agent_surptr %>%
  ggplot(aes(x=x, y=y, fill=PP)) +

```

```

geom_tile()+
scale_fill_gradientn(colours = c('white','grey', 'black'),limits = c(0.8, 1),
                    na.value='white' ) +
labs(fill=(expression(paste('P(|',Delta,mu, V, '| > 0)', ))),
      x=element_blank(),
      y=element_blank()) +
guides(alpha = "none") +
theme(panel.grid = element_blank(), panel.border = element_blank(),
      strip.background = element_blank(),strip.text.x = element_text(size=5),
      axis.text.y=element_blank(),
      axis.ticks.y=element_blank(),
      plot.background = element_rect(fill = "transparent", colour = NA))

summary_de_agent_surptr.condition <- preds.de.agent_surptr_long %>%
  filter(surprisal == 0) %>%
  group_by(x,y,samp) %>%
  mutate(diff_condition = value[condition == 'Abias'] -
          value[condition == 'nonAbias']) %>%
  ungroup() %>%
  group_by(x,y) %>%
  summarise(PP = ifelse(mean(diff_condition) > 0,
                       mean(diff_condition > 0),
                       mean(diff_condition < 0)),
            mean_diff = mean(diff_condition)) %>%
  mutate(x = -x)

plot.tr.agent.de.cond <- summary_de_agent_surptr.condition %>%
  mutate(sig = ifelse(PP>0.80, 1, 0)) %>%
  ggplot(aes(x=x, y=y, fill=mean_diff, alpha = sig)) +
  geom_tile()+
  scale_fill_gradient2(low = '#0053d3', high = '#b22709', midpoint=0,
                      aesthetics='fill')+
  labs(fill=(expression(paste(Delta, paste(mu, "V")))),
      x=element_blank(),
      y=element_blank()) +
  guides(alpha = "none") +
  theme(panel.grid = element_blank(), panel.border = element_blank(),
      strip.background = element_blank(),strip.text.x = element_text(size=5),
      axis.text.y=element_blank(),
      axis.text.x = element_blank(),
      axis.ticks.y=element_blank(),
      axis.ticks.x=element_blank(),
      plot.background = element_rect(fill = "transparent", colour = NA))

plot.tr.agent.de.cond.pp <- summary_de_agent_surptr.condition %>%
  ggplot(aes(x=x, y=y, fill=PP)) +
  geom_tile()+
  scale_fill_gradientn(colours = c('white','grey', 'black'),limits = c(0.8, 1),
                      na.value='white' ) +
  labs(fill=(expression(paste('P(|',Delta,mu, V, '| > 0)', ))),
      x=element_blank(),
      y=element_blank()) +
  guides(alpha = "none") +

```

```

theme(panel.grid = element_blank(), panel.border = element_blank(),
      strip.background = element_blank(),strip.text.x = element_text(size=5),
      axis.text.y=element_blank(),
      axis.ticks.y=element_blank(),
      plot.background = element_rect(fill = "transparent", colour = NA))

```

```

wrap_plots(list(plot.tr.agent.de.cond, plot.tr.agent.surp.de,
                plot.tr.agent.de.cond.pp, plot.tr.agent.surp.de.pp))

```

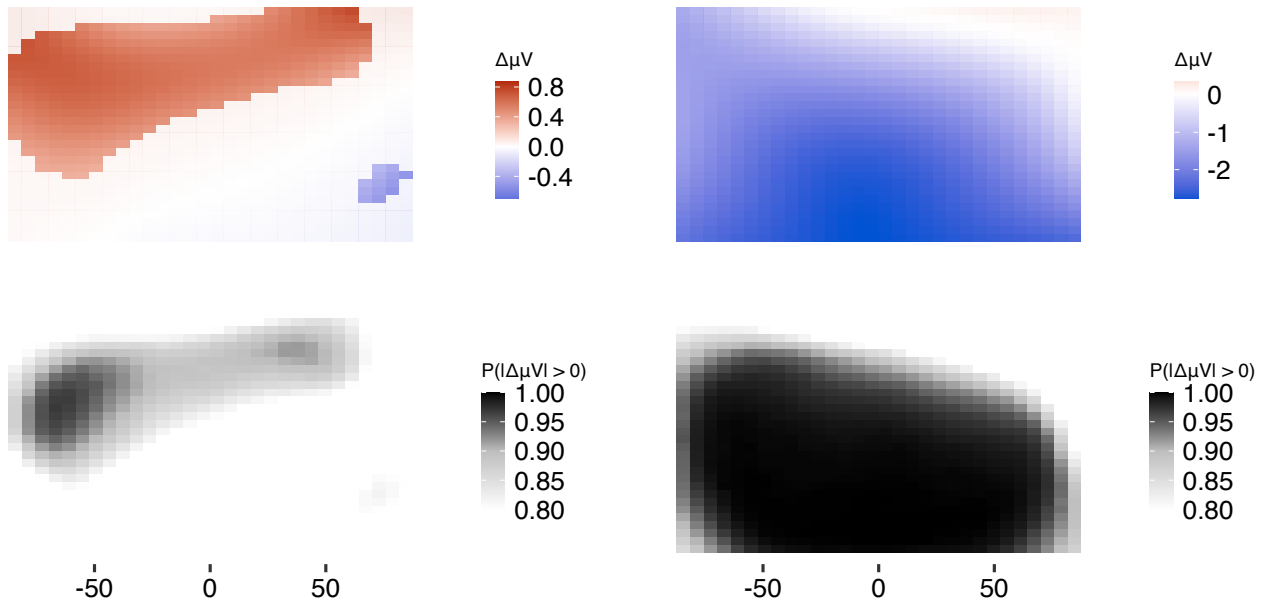

Figure S6: Left: Pair-wise fitted differences of micro-volt for sentences with vs. sentences without the predicted reanalysis from model with BERT surprisal as well as agent preference predictor. Right: Percentage of posterior probability mass of micro-volt mean difference below or above 0.

### S3.3.7 GPT-based surprisal and Agent Preference

```

newdata.de.agent.surpgpt <- newdata.de.agent.surplstm %>%
  dplyr::rename(surprisal.gpt.Z = surprisal.lstm.Z)
preds.de.agent.surpgpt <- posterior_epred(model.de.agent.surpgpt,
                                         newdata=newdata.de.agent.surpgpt,
                                         re.form=NA)

preds.de.agent.surpgpt_long <- as.data.frame(preds.de.agent.surpgpt) %>%
  mutate(samp = 1:nrow(preds.de.agent.surpgpt)) %>%
  pivot_longer(-samp)

preds.de.agent.surpgpt_long$x <- rep(newdata.de.agent.surpgpt$x, n_samps)
preds.de.agent.surpgpt_long$y <- rep(newdata.de.agent.surpgpt$y, n_samps)
preds.de.agent.surpgpt_long$surprisal <- rep(newdata.de.agent.surpgpt$surprisal.gpt.Z,
                                             n_samps)
preds.de.agent.surpgpt_long$condition <- rep(newdata.de.agent.surpgpt$condition,
                                             n_samps)

```

```

summary_de_agent_surpgpt.abias <- preds.de.agent_surpgpt_long %>%
  filter(condition %in% 'Abias') %>%
  group_by(x,y,samp) %>%
  mutate(diff_surprisal_low_mean = value[surprisal == 2] -
         value[surprisal == -2]) %>%
  ungroup() %>%
  group_by(x,y) %>%
  summarise(PP = ifelse(mean(diff_surprisal_low_mean) > 0,
                       mean(diff_surprisal_low_mean > 0),
                       mean(diff_surprisal_low_mean < 0)),
            mean_diff = mean(diff_surprisal_low_mean)) %>%
  mutate('condition' = 'Abias')

summary_de_agent_surpgpt.nonabias <- preds.de.agent_surpgpt_long %>%
  filter(condition %in% 'Abias') %>%
  group_by(x,y,samp) %>%
  mutate(diff_surprisal_low_mean = value[surprisal == 2] -
         value[surprisal == -2]) %>%
  ungroup() %>%
  group_by(x,y) %>%
  summarise(PP = ifelse(mean(diff_surprisal_low_mean) > 0,
                       mean(diff_surprisal_low_mean > 0),
                       mean(diff_surprisal_low_mean < 0)),
            mean_diff = mean(diff_surprisal_low_mean)) %>%
  mutate('condition' = 'nonAbias')

summary_de_agent_surpgpt <- rbind(summary_de_agent_surpgpt.nonabias,
                                 summary_de_agent_surpgpt.abias) %>%
  mutate(x = -x)

plot.gpt.agent.surp.de <- summary_de_agent_surpgpt %>%
  ggplot(aes(x=x, y=y, fill=mean_diff, alpha = PP)) +
  geom_tile()+
  scale_fill_gradient2(low = '#0053d3', high = '#b22709', midpoint=0,
                      aesthetics='fill')+
  labs(fill=(expression(paste(Delta, paste(mu, "V")))),
       x=element_blank(),
       y=element_blank()) +
  guides(alpha = "none") +
  theme(panel.grid = element_blank(), panel.border = element_blank(),
        strip.background = element_blank(),strip.text.x = element_text(size=5),
        axis.text.y=element_blank(),
        axis.text.x = element_blank(),
        axis.ticks.y=element_blank(),
        axis.ticks.x=element_blank(),
        plot.background = element_rect(fill = "transparent", colour = NA))

plot.gpt.agent.surp.de.pp <- summary_de_agent_surpgpt %>%
  ggplot(aes(x=x, y=y, fill=PP)) +
  geom_tile()+
  scale_fill_gradientn(colours = c('white','grey', 'black'),limits = c(0.8, 1),
                      na.value='white' ) +
  labs(fill=(expression(paste('P(|',Delta,mu, V, '| > 0)', ))),

```

```

    x=element_blank(),
    y=element_blank()) +
guides(alpha = "none") +
theme(panel.grid = element_blank(), panel.border = element_blank(),
      strip.background = element_blank(),strip.text.x = element_text(size=5),
      axis.text.y=element_blank(),
      axis.ticks.y=element_blank(),
      plot.background = element_rect(fill = "transparent", colour = NA))

summary_de_agent_surpgpt.condition <- preds.de.agent.surpgpt_long %>%
  filter(surprisal == 0) %>%
  group_by(x,y,samp) %>%
  mutate(diff_condition = value[condition == 'Abias'] -
          value[condition == 'nonAbias']) %>%
  ungroup() %>%
  group_by(x,y) %>%
  summarise(PP = ifelse(mean(diff_condition) > 0,
                       mean(diff_condition > 0),
                       mean(diff_condition < 0)),
            mean_diff = mean(diff_condition)) %>%
  mutate(x = -x)

plot.gpt.agent.de.cond <- summary_de_agent_surpgpt.condition %>%
  mutate(sig = ifelse(PP>0.80, 1, 0)) %>%
  ggplot(aes(x=x, y=y, fill=mean_diff, alpha = sig)) +
  geom_tile()+
  scale_fill_gradient2(low = '#0053d3', high = '#b22709', midpoint=0,
                      aesthetics='fill')+
  labs(fill=(expression(paste(Delta, paste(mu, "V")))),
       x=element_blank(),
       y=element_blank()) +
  guides(alpha = "none") +
  theme(panel.grid = element_blank(), panel.border = element_blank(),
        strip.background = element_blank(),strip.text.x = element_text(size=5),
        axis.text.y=element_blank(),
        axis.text.x = element_blank(),
        axis.ticks.y=element_blank(),
        axis.ticks.x=element_blank(),
        plot.background = element_rect(fill = "transparent", colour = NA))

plot.gpt.agent.de.cond.pp <- summary_de_agent_surpgpt.condition %>%
  ggplot(aes(x=x, y=y, fill=PP)) +
  geom_tile()+
  scale_fill_gradientn(colours = c('white','grey', 'black'),limits = c(0.8, 1),
                      na.value='white' ) +
  labs(fill=(expression(paste('P(|',Delta,mu, V, '| > 0)', ))),
       x=element_blank(),
       y=element_blank()) +
  guides(alpha = "none") +
  theme(panel.grid = element_blank(), panel.border = element_blank(),
        strip.background = element_blank(),strip.text.x = element_text(size=5),
        axis.text.y=element_blank(),
        axis.ticks.y=element_blank(),

```

```
plot.background = element_rect(fill = "transparent", colour = NA))
```

```
wrap_plots(list(plot.gpt.agent.de.cond, plot.gpt.agent.surp.de,
                plot.gpt.agent.de.cond.pp, plot.gpt.agent.surp.de.pp))
```

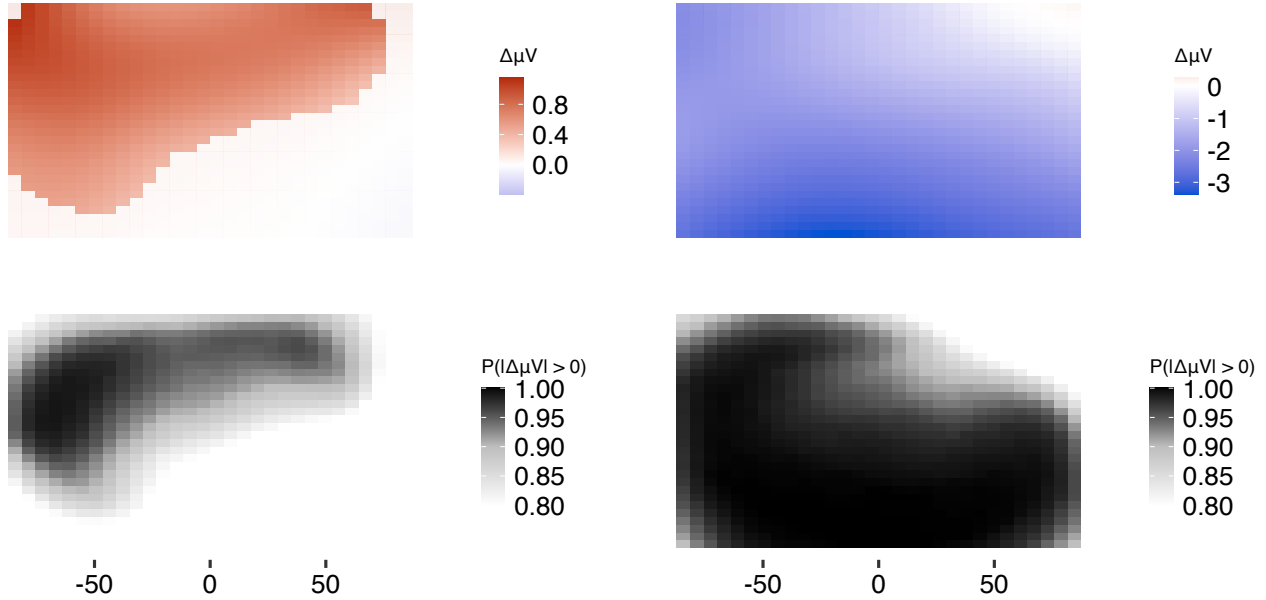

Figure S7: Left: Pair-wise fitted differences of micro-volt for sentences with vs. sentences without the predicted reanalysis from model with GPT-2 surprisal as well as agent preference predictor. Right: Percentage of posterior probability mass of micro-volt mean difference below or above 0.

### S3.3.8 Strongest effect summary

Table S1: German: This table contains the lowest mean delta microVolt (i.e. strongest effect size across the scalp, blue in the plots above) and the maximum proportion of the posterior distribution that is lower than 0 for the highest-ranked model, agent preference + bert surprisal.

| predictor                           | $\min(\text{mean}(\Delta\mu V))$ | $\max(P\Delta\mu V < 0)$ | NA  |
|-------------------------------------|----------------------------------|--------------------------|-----|
| agent preference and lstm surprisal | surprisal                        | -6.625                   | 1.0 |
| agent preference and lstm surprisal | agent preference                 | -0.951                   | 0.9 |



## 4 Analysis 2: Predicting ERPs for Hindi

# S4: Study 2: Predicting ERPs (Hindi)\*

Eva Huber      Sebastian Sauppe      Arrate Isasi-Isasmendi  
Ina Bornkessel-Schlesewsky      Paola Merlo      Balthasar Bickel

2023-08-29

## Contents

|                                               |          |
|-----------------------------------------------|----------|
| <b>S4 Hindi</b>                               | <b>1</b> |
| S4.1 Models . . . . .                         | 1        |
| S4.2 Model comparison with stacking . . . . . | 12       |
| S4.3 Model predictions . . . . .              | 13       |

**REPRODUCIBILITY STATEMENT:** All of the models included here were fitted on an M1 processor using R Version 4.2.2 and brms version 2.14.0.

## S4 Hindi

### S4.1 Models

We model the EEG results in micro-volt (mV below). For this, we fit Bayesian Generalised Additive Models in `brms` with different predictors and compare models by means of stacking in order to find the model with highest predictive performance. In the model below `condition` refers to whether or not we expect a reanalysis (see main text).

We check convergence by ensuring that Effective Sample Size  $ESS > 100$  and diagnostic  $\hat{R} < 1.05$ . Additionally, we perform posterior predictive checks to compare the predicted values to the observed data.

#### S4.1.1 Agent preference alone

```
hindi.data <- readRDS('../results/hindi_mv_surprisal_0506.RDS')  
  
if (!file.exists('../gams_fitted_models/gam_hi_agent.RDS')){  
  prior.brms <- c(  
    prior(normal(0,1), class = b),  
    prior(exponential(1), class = sigma)  
  )  
  model.agent <- brm(mV  
                    ~ 1  
                    + condition
```

---

\*This document was `rmarkdown::render`'ed from an R script `'main_scripts/Hindi_analysis2.R'` available at <https://osf.io/hbj67>.

```

+ trial_number.Z
+ t2(x, y, by = condition, k = 10)
+ t2(x, y, Participant, bs = "re")
+ t2(x, y, Stimulus, bs = "re"),
data = hindi.data,
sample_prior = TRUE,
prior = prior.brms,
chains = 4, iter = 2000, cores = 4
)
saveRDS(model.agent, '../gams_fitted_models/gam_hi_agent.RDS')
}
model.hi.agent <- readRDS('../gams_fitted_models/gam_hi_agent.RDS')
summary(model.hi.agent)

```

```

## Family: gaussian
## Links: mu = identity; sigma = identity
## Formula: mV ~ 1 + trial_number.Z + condition + t2(x, y, by = condition, k = 10) + t2(x, y, Participant)
## Data: hindi.data (Number of observations: 31104)
## Samples: 4 chains, each with iter = 2000; warmup = 1000; thin = 1;
## total post-warmup samples = 4000
##
## Smooth Terms:
##
## Estimate Est.Error 1-95% CI u-95% CI Rhat Bulk_ESS Tail_ESS
## sds(t2xyconditionAbias_1) 0.77 0.71 0.03 2.52 1.00 2423 2674
## sds(t2xyconditionAbias_2) 7.93 2.54 4.37 13.96 1.00 1850 2757
## sds(t2xyconditionAbias_3) 4.42 1.84 1.84 8.77 1.00 2396 2703
## sds(t2xyconditionnonAbias_1) 0.75 0.69 0.02 2.51 1.00 2056 2198
## sds(t2xyconditionnonAbias_2) 6.93 2.29 3.54 12.33 1.00 2149 2968
## sds(t2xyconditionnonAbias_3) 3.14 1.63 0.73 7.05 1.00 1944 1651
## sds(t2xyParticipant_1) 0.23 0.11 0.02 0.44 1.01 609 320
## sds(t2xyStimulus_1) 0.06 0.05 0.00 0.17 1.00 3415 2120
##
## Population-Level Effects:
##
## Estimate Est.Error 1-95% CI u-95% CI Rhat Bulk_ESS Tail_ESS
## Intercept 0.32 0.07 0.18 0.45 1.00 4593 3199
## trial_number.Z -0.11 0.04 -0.19 -0.04 1.00 8761 3030
## condition2 -0.01 0.09 -0.19 0.18 1.00 3915 3094
## t2xy:conditionAbias_1 -0.09 0.08 -0.24 0.06 1.00 3182 2729
## t2xy:conditionAbias_2 1.15 0.07 1.01 1.29 1.00 4351 2850
## t2xy:conditionAbias_3 0.05 0.10 -0.14 0.25 1.00 2852 3236
## t2xy:conditionnonAbias_1 -0.19 0.07 -0.33 -0.06 1.00 3622 3144
## t2xy:conditionnonAbias_2 1.22 0.06 1.09 1.34 1.00 3626 3011
## t2xy:conditionnonAbias_3 -0.01 0.09 -0.17 0.17 1.00 3409 3036
##
## Family Specific Parameters:
##
## Estimate Est.Error 1-95% CI u-95% CI Rhat Bulk_ESS Tail_ESS
## sigma 6.59 0.03 6.54 6.64 1.00 8963 3079
##
## Samples were drawn using sampling(NUTS). For each parameter, Bulk_ESS
## and Tail_ESS are effective sample size measures, and Rhat is the potential
## scale reduction factor on split chains (at convergence, Rhat = 1).

```

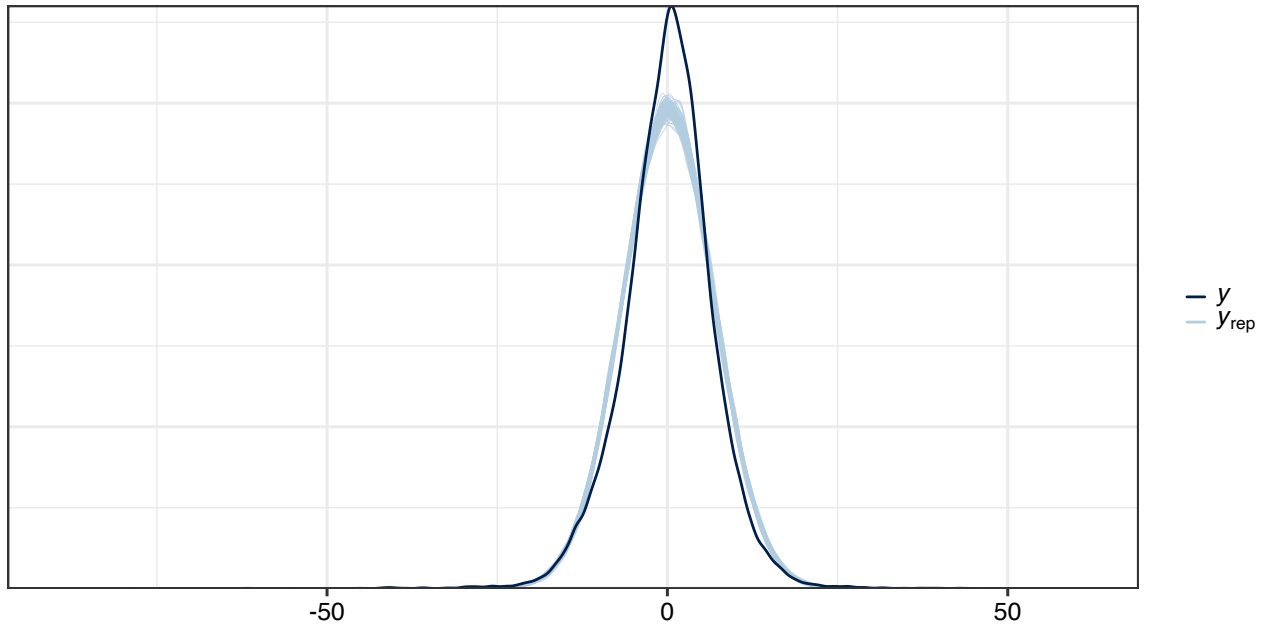

### S4.1.2 Surprisal alone

LSTM-based surprisal:

```
if (!file.exists('../gams_fitted_models/gam_hi_lstm.RDS')){
  model.surprisal.lstm <- brm(mV
    ~ 1
    + trial_number.Z
    + surprisal.lstm.Z
    + t2(x, y, by = surprisal.lstm.Z, k = 10)
    + t2(x, y, Participant, bs = "re")
    + t2(x, y, Stimulus, bs = "re"),
    prior = prior.brms,
    sample_prior = TRUE,
    data = hindi.data,
    chains = 4, iter = 2000, cores = 4
  )
  saveRDS(model.surprisal.lstm, '../gams_fitted_models/gam_hi_lstm.RDS')
}
model.hi.surplstm <- readRDS('../gams_fitted_models/gam_hi_lstm.RDS')
summary(model.hi.surplstm)
```

```
## Family: gaussian
## Links: mu = identity; sigma = identity
## Formula: mV ~ 1 + trial_number.Z + surprisal.lstm.Z + t2(x, y, by = surprisal.lstm.Z, k = 10) + t2(x
## Data: hindi.data (Number of observations: 31104)
## Samples: 4 chains, each with iter = 2000; warmup = 1000; thin = 1;
## total post-warmup samples = 4000
##
## Smooth Terms:
## Estimate Est.Error l-95% CI u-95% CI Rhat Bulk_ESS Tail_ESS
## sds(t2xysurprisal.lstm.Z_1) 0.38 0.36 0.01 1.34 1.00 2546 2566
```

```

## sds(t2xysurprisal.lstm.Z_2)    0.81    0.75    0.03    2.80 1.00    2790    2176
## sds(t2xysurprisal.lstm.Z_3)    0.91    0.82    0.03    3.09 1.00    2109    1936
## sds(t2xyParticipant_1)         0.22    0.10    0.02    0.42 1.00    1006    1010
## sds(t2xyStimulus_1)           0.06    0.05    0.00    0.17 1.00    3134    2159
##
## Population-Level Effects:
##           Estimate Est.Error 1-95% CI u-95% CI Rhat Bulk_ESS Tail_ESS
## Intercept           0.13     0.04    0.06    0.21 1.00    8694    2731
## trial_number.Z      -0.11     0.04   -0.19   -0.04 1.00    8484    2781
## surprisal.lstm.Z    -0.01     0.71   -1.41    1.40 1.00    4863    3267
## t2xy:surprisal.lstm.Z_1  0.02     0.68   -1.31    1.35 1.00    4845    3185
## t2xy:surprisal.lstm.Z_2  0.06     0.04   -0.02    0.15 1.00    7020    3552
## t2xy:surprisal.lstm.Z_3 -0.03     0.04   -0.11    0.06 1.00    8443    3088
## t2xy:surprisal.lstm.Z_4  0.00     0.05   -0.09    0.09 1.00    7996    3415
##
## Family Specific Parameters:
##           Estimate Est.Error 1-95% CI u-95% CI Rhat Bulk_ESS Tail_ESS
## sigma      6.70     0.03    6.64    6.75 1.00   13108    2637
##
## Samples were drawn using sampling(NUTS). For each parameter, Bulk_ESS
## and Tail_ESS are effective sample size measures, and Rhat is the potential
## scale reduction factor on split chains (at convergence, Rhat = 1).

```

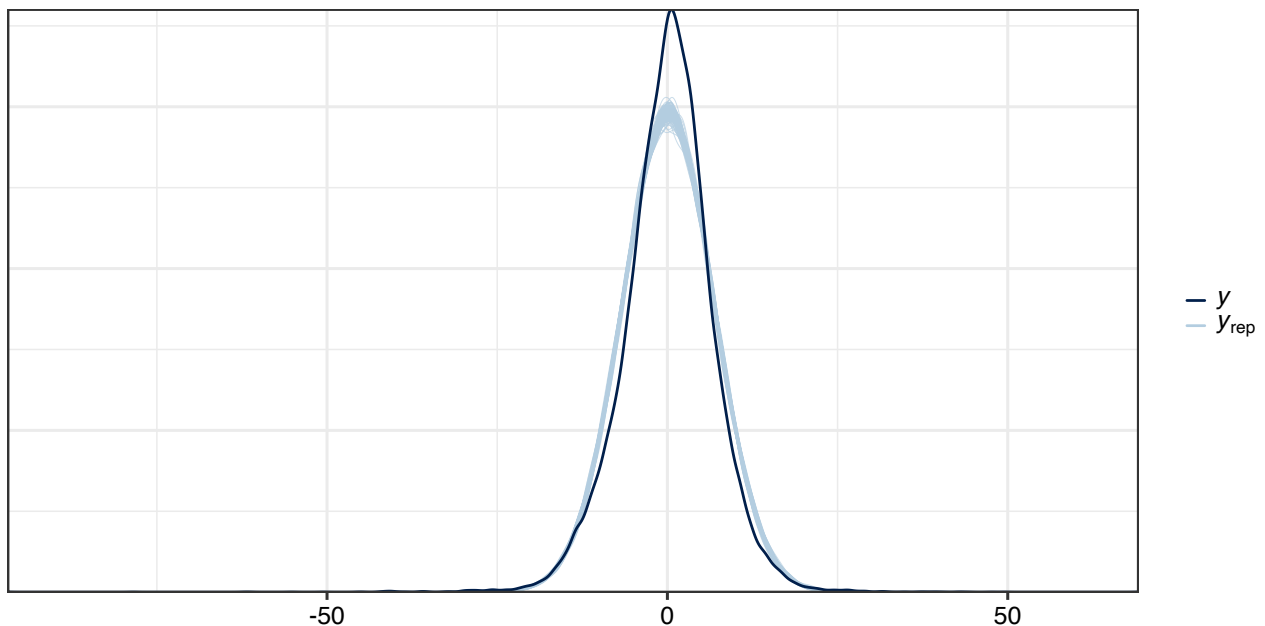

BERT-based surprisal:

```

if (!file.exists('../gams_fitted_models/gam_hi_bert.RDS')){
  model.surprisal.tr <- brm(mV
    ~ 1
    + trial_number.Z
    + surprisal.tr.Z
    + t2(x, y, by = surprisal.tr.Z, k = 10)
    + t2(x, y, Participant, bs = "re")
    + t2(x, y, Stimulus, bs = "re"),
    prior = prior.brms,

```

```

        sample_prior = TRUE,
        data = hindi.data,
        chains = 4, iter = 2000, cores = 4
    )
    saveRDS(model.surprisal.tr, '../gams_fitted_models/gam_hi_bert.RDS')
}
model.hi.surptr <- readRDS('../gams_fitted_models/gam_hi_bert.RDS')
summary(model.hi.surptr)

```

```

## Family: gaussian
## Links: mu = identity; sigma = identity
## Formula: mV ~ 1 + trial_number.Z + surprisal.tr.Z + t2(x, y, by = surprisal.tr.Z, k = 10) + t2(x, y,
## Data: hindi.data (Number of observations: 31104)
## Samples: 4 chains, each with iter = 2000; warmup = 1000; thin = 1;
## total post-warmup samples = 4000
##
## Smooth Terms:
## Estimate Est.Error l-95% CI u-95% CI Rhat Bulk_ESS Tail_ESS
## sds(t2xysurprisal.tr.Z_1) 0.42 0.38 0.01 1.45 1.00 2512 2427
## sds(t2xysurprisal.tr.Z_2) 0.84 0.82 0.03 2.88 1.00 2861 2605
## sds(t2xysurprisal.tr.Z_3) 0.86 0.80 0.03 2.99 1.00 2915 2362
## sds(t2xyParticipant_1) 0.22 0.10 0.02 0.41 1.00 935 1053
## sds(t2xyStimulus_1) 0.06 0.05 0.00 0.17 1.00 2562 1632
##
## Population-Level Effects:
## Estimate Est.Error l-95% CI u-95% CI Rhat Bulk_ESS Tail_ESS
## Intercept 0.13 0.04 0.06 0.21 1.00 9762 2807
## trial_number.Z -0.12 0.04 -0.19 -0.04 1.00 10493 2667
## surprisal.tr.Z -0.07 0.73 -1.52 1.40 1.00 5283 2848
## t2xy:surprisal.tr.Z_1 -0.07 0.70 -1.48 1.31 1.00 5253 2923
## t2xy:surprisal.tr.Z_2 0.02 0.04 -0.06 0.10 1.00 6375 3207
## t2xy:surprisal.tr.Z_3 0.05 0.04 -0.03 0.13 1.00 8209 3003
## t2xy:surprisal.tr.Z_4 -0.00 0.05 -0.10 0.09 1.00 7685 3077
##
## Family Specific Parameters:
## Estimate Est.Error l-95% CI u-95% CI Rhat Bulk_ESS Tail_ESS
## sigma 6.70 0.03 6.65 6.75 1.00 8193 2223
##
## Samples were drawn using sampling(NUTS). For each parameter, Bulk_ESS
## and Tail_ESS are effective sample size measures, and Rhat is the potential
## scale reduction factor on split chains (at convergence, Rhat = 1).

```

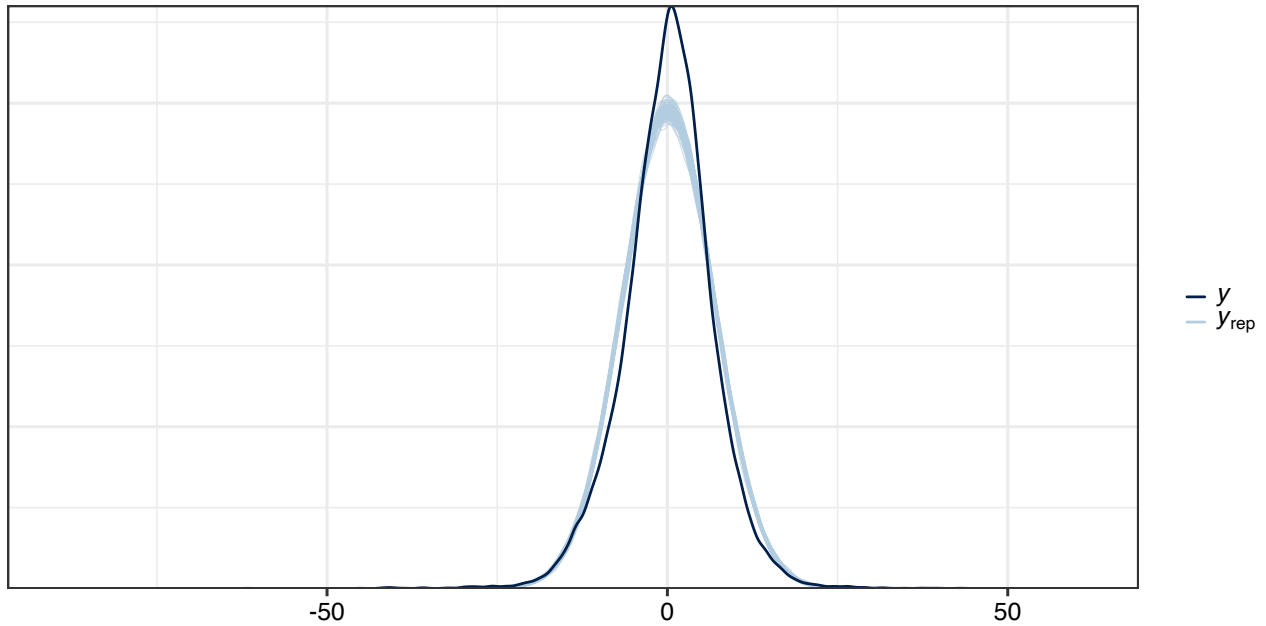

GPT-based surprisal

```
if (!file.exists('../gams_fitted_models/gam_hi_gpt.RDS')){
  model.surprisal.gpt <- brm(mV
    ~ 1
    + trial_number.Z
    + surprisal.gpt.Z
    + t2(x, y, by = surprisal.gpt.Z, k = 10)
    + t2(x, y, Participant, bs = "re")
    + t2(x, y, Stimulus, bs = "re"),
    prior = prior.brms,
    sample_prior = TRUE,
    data = hindi.data,
    chains = 4, iter = 2000, cores = 4
  )
  saveRDS(model.surprisal.gpt, '../gams_fitted_models/gam_hi_gpt.RDS')
}
model.hi.surgpt <- readRDS('../gams_fitted_models/gam_hi_gpt.RDS')
summary(model.hi.surgpt)
```

```
## Family: gaussian
## Links: mu = identity; sigma = identity
## Formula: mV ~ 1 + trial_number.Z + surprisal.gpt.Z + t2(x, y, by = surprisal.gpt.Z, k = 10) + t2(x, y, Participant, bs = "re") + t2(x, y, Stimulus, bs = "re")
## Data: hindi.data (Number of observations: 31104)
## Samples: 4 chains, each with iter = 2000; warmup = 1000; thin = 1;
##           total post-warmup samples = 4000
##
## Smooth Terms:
##           Estimate Est.Error 1-95% CI u-95% CI Rhat Bulk_ESS Tail_ESS
## sds(t2xysurprisal.gpt.Z_1)  0.28   0.27   0.01   1.00 1.00   2294   2808
## sds(t2xysurprisal.gpt.Z_2)  2.71   1.00   1.33   5.31 1.00   2295   2998
## sds(t2xysurprisal.gpt.Z_3)  1.46   0.75   0.45   3.35 1.00   1966   1682
## sds(t2xyParticipant_1)     0.21   0.10   0.02   0.42 1.01    943    729
## sds(t2xyStimulus_1)       0.06   0.05   0.00   0.17 1.00   3155   2276
```

```
##
## Population-Level Effects:
##           Estimate Est.Error 1-95% CI u-95% CI Rhat Bulk_ESS Tail_ESS
## Intercept           0.13     0.05    0.04    0.22 1.00    4303    2502
## trial_number.Z      -0.11     0.04   -0.19   -0.04 1.00    8526    2673
## surprisal.gpt.Z     0.03     0.74   -1.43    1.45 1.00    2915    2745
## t2xy:surprisal.gpt.Z_1 0.03     0.70   -1.32    1.44 1.00    2920    2739
## t2xy:surprisal.gpt.Z_2 0.04     0.03   -0.01    0.09 1.00    4083    2982
## t2xy:surprisal.gpt.Z_3 -0.33    0.02   -0.38   -0.28 1.00    4809    3135
## t2xy:surprisal.gpt.Z_4 0.02     0.03   -0.05    0.08 1.00    4199    3143
##
## Family Specific Parameters:
##           Estimate Est.Error 1-95% CI u-95% CI Rhat Bulk_ESS Tail_ESS
## sigma      6.66     0.03    6.61    6.72 1.00    6654    2492
##
## Samples were drawn using sampling(NUTS). For each parameter, Bulk_ESS
## and Tail_ESS are effective sample size measures, and Rhat is the potential
## scale reduction factor on split chains (at convergence, Rhat = 1).
```

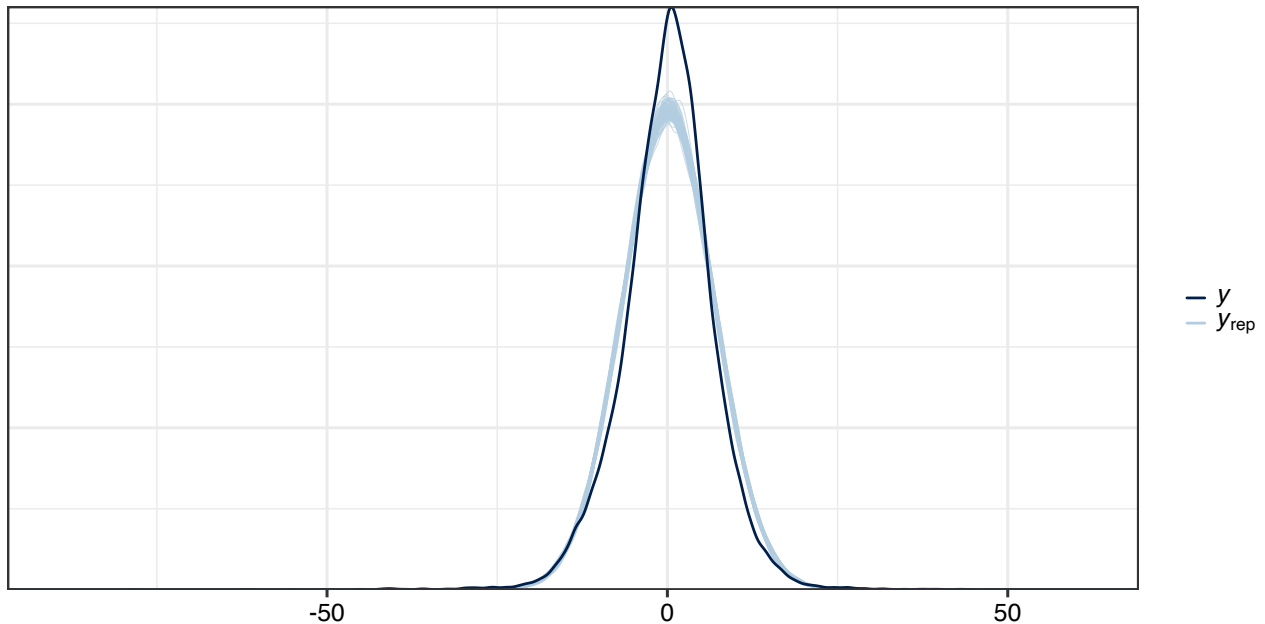

### S4.1.3 Agent preference and surprisal

LSTM-based surprisal:

```
if (!file.exists('../gams_fitted_models/gam_hi_agent_lstm.RDS')){
  model.agent.surprisal.lstm <- brm(mV
    ~ 1
    + trial_number.Z
    + surprisal.lstm.Z
    + condition
    + t2(x, y, by = condition, k = 10)
    + t2(x, y, by = surprisal.lstm.Z, k = 10)
    + t2(x, y, Participant, bs = "re")
```



```

+ t2(x, y, Stimulus, bs = "re"),
prior = prior.brms,
sample_prior = TRUE,
data = hindi.data,
chains = 4, iter = 2000, cores = 4
)
saveRDS(model.agent.surprisal.lstm, '../gams_fitted_models/gam_hi_agent_lstm.RDS')
}
model.hi.agent.surplstm <- readRDS('../gams_fitted_models/gam_hi_agent_lstm.RDS')
summary(model.hi.agent.surplstm)

```

```

## Family: gaussian
## Links: mu = identity; sigma = identity
## Formula: mV ~ 1 + trial_number.Z + surprisal.lstm.Z + condition + t2(x, y, by = condition, k = 10) +
## Data: hindi.data (Number of observations: 31104)
## Samples: 4 chains, each with iter = 2000; warmup = 1000; thin = 1;
## total post-warmup samples = 4000
##
## Smooth Terms:
## Estimate Est.Error l-95% CI u-95% CI Rhat Bulk_ESS Tail_ESS
## sds(t2xyconditionAbias_1) 0.77 0.73 0.02 2.71 1.00 2097 1899
## sds(t2xyconditionAbias_2) 7.97 2.52 4.36 14.02 1.00 2363 2741
## sds(t2xyconditionAbias_3) 4.44 1.87 1.84 9.01 1.00 2573 2811
## sds(t2xyconditionnonAbias_1) 0.74 0.67 0.03 2.49 1.00 2303 2284
## sds(t2xyconditionnonAbias_2) 6.80 2.28 3.55 12.46 1.00 1824 2515
## sds(t2xyconditionnonAbias_3) 3.19 1.65 0.73 7.18 1.00 2290 2081
## sds(t2xysurprisal.lstm.Z_1) 0.39 0.36 0.01 1.33 1.00 2835 2285
## sds(t2xysurprisal.lstm.Z_2) 0.79 0.76 0.02 2.81 1.00 3083 2736
## sds(t2xysurprisal.lstm.Z_3) 0.91 0.82 0.04 3.04 1.00 2198 2481
## sds(t2xyParticipant_1) 0.24 0.10 0.02 0.44 1.00 718 389
## sds(t2xyStimulus_1) 0.06 0.05 0.00 0.17 1.00 3610 2300
##
## Population-Level Effects:
## Estimate Est.Error l-95% CI u-95% CI Rhat Bulk_ESS Tail_ESS
## Intercept 0.31 0.07 0.18 0.45 1.00 4788 3436
## trial_number.Z -0.11 0.04 -0.19 -0.04 1.00 10193 2966
## surprisal.lstm.Z 0.03 0.73 -1.38 1.44 1.00 4252 3121
## condition2 0.00 0.09 -0.18 0.19 1.00 4238 3265
## t2xy:conditionAbias_1 0.09 0.08 -0.07 0.24 1.00 4024 3116
## t2xy:conditionAbias_2 -1.15 0.07 -1.29 -1.01 1.00 5362 3237
## t2xy:conditionAbias_3 0.05 0.10 -0.14 0.24 1.00 3455 3134
## t2xy:conditionnonAbias_1 0.19 0.07 0.06 0.33 1.00 3921 3154
## t2xy:conditionnonAbias_2 -1.22 0.06 -1.34 -1.09 1.00 4934 3187
## t2xy:conditionnonAbias_3 -0.01 0.09 -0.18 0.16 1.00 3590 3214
## t2xy:surprisal.lstm.Z_1 -0.01 0.70 -1.36 1.34 1.00 4196 3290
## t2xy:surprisal.lstm.Z_2 0.06 0.04 -0.02 0.15 1.00 7171 3550
## t2xy:surprisal.lstm.Z_3 -0.03 0.04 -0.10 0.05 1.00 6627 3197
## t2xy:surprisal.lstm.Z_4 0.00 0.05 -0.09 0.10 1.00 7109 2944
##
## Family Specific Parameters:
## Estimate Est.Error l-95% CI u-95% CI Rhat Bulk_ESS Tail_ESS
## sigma 6.59 0.03 6.54 6.64 1.00 10150 2984
##

```

```
## Samples were drawn using sampling(NUTS). For each parameter, Bulk_ESS
## and Tail_ESS are effective sample size measures, and Rhat is the potential
## scale reduction factor on split chains (at convergence, Rhat = 1).
```

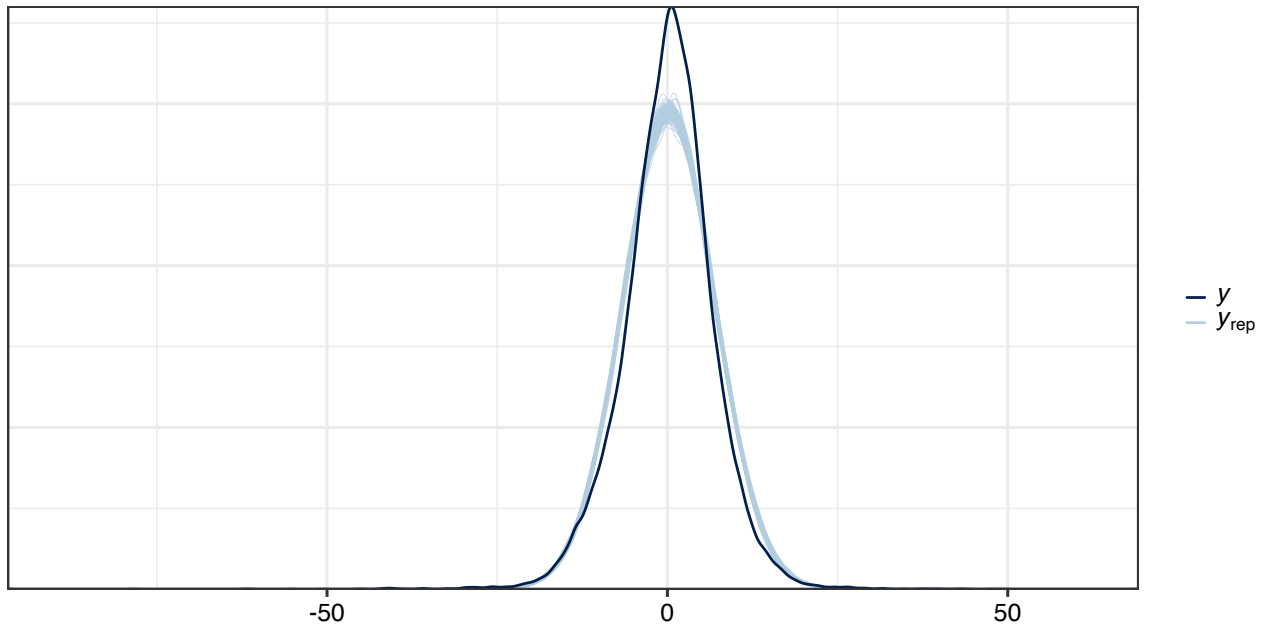

BERT-based surprisal:

```
if (!file.exists('../gams_fitted_models/gam_hi_agent_bert.RDS')){
  model.agent.surprisal.tr <- brm(mV
    ~ 1
    + trial_number.Z
    + surprisal.tr.Z
    + condition
    + t2(x, y, by = condition, k = 10)
    + t2(x, y, by = surprisal.tr.Z, k = 10)
    + t2(x, y, Participant, bs = "re")
    + t2(x, y, Stimulus, bs = "re"),
    prior = prior.brms,
    sample_prior = TRUE,
    data = hindi.data,
    chains = 4, iter = 2000, cores = 4
  )
  saveRDS(model.agent.surprisal.tr,
    '../gams_fitted_models/gam_hi_agent_bert.RDS')
}
model.hi.agent.surptr <- readRDS('../gams_fitted_models/gam_hi_agent_bert.RDS')
```

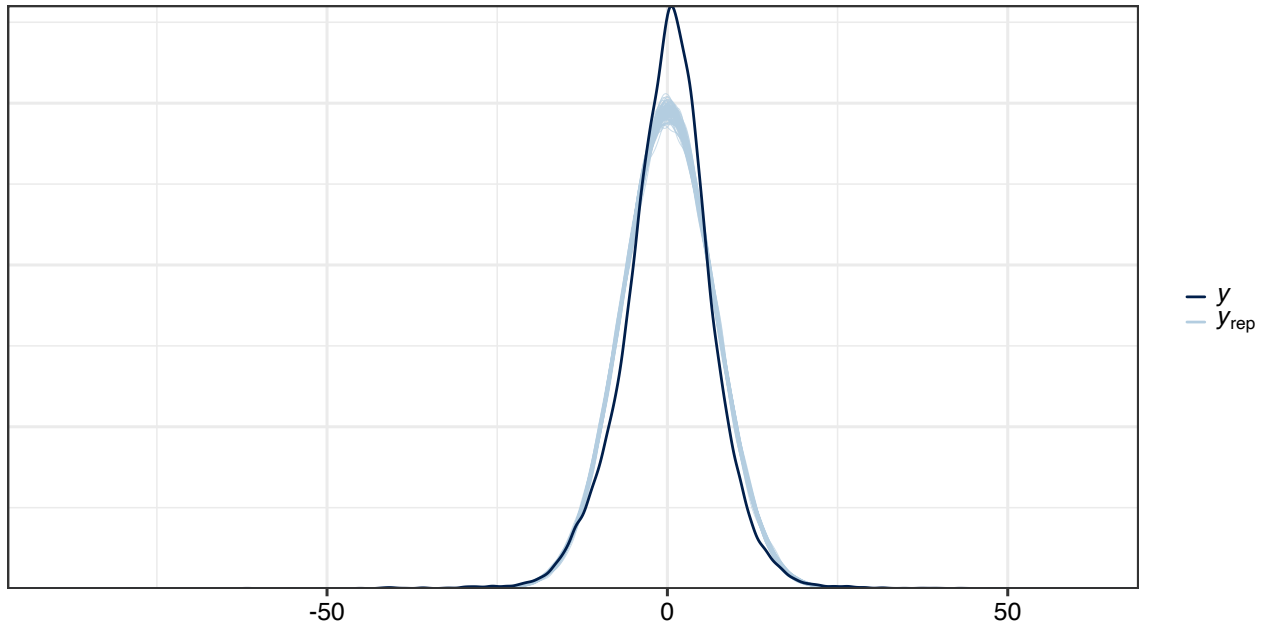

GPT-based surprisal:

```
if (!file.exists('../gams_fitted_models/gam_hi_agent_gpt.RDS')){
  model.agent.surprisal.gpt <- brm(mV
    ~ 1
    + trial_number.Z
    + surprisal.gpt.Z
    + condition
    + t2(x, y, by = condition, k = 10)
    + t2(x, y, by = surprisal.gpt.Z, k = 10)
    + t2(x, y, Participant, bs = "re")
    + t2(x, y, Stimulus, bs = "re"),
    prior = prior.brms,
    sample_prior = TRUE,
    data = hindi.data,
    chains = 4, iter = 2000, cores = 4
  )
  saveRDS(model.agent.surprisal.gpt,
    '../gams_fitted_models/gam_hi_agent_gpt.RDS')
}
model.hi.agent.surpgpt <- readRDS('../gams_fitted_models/gam_hi_agent_gpt.RDS')
```

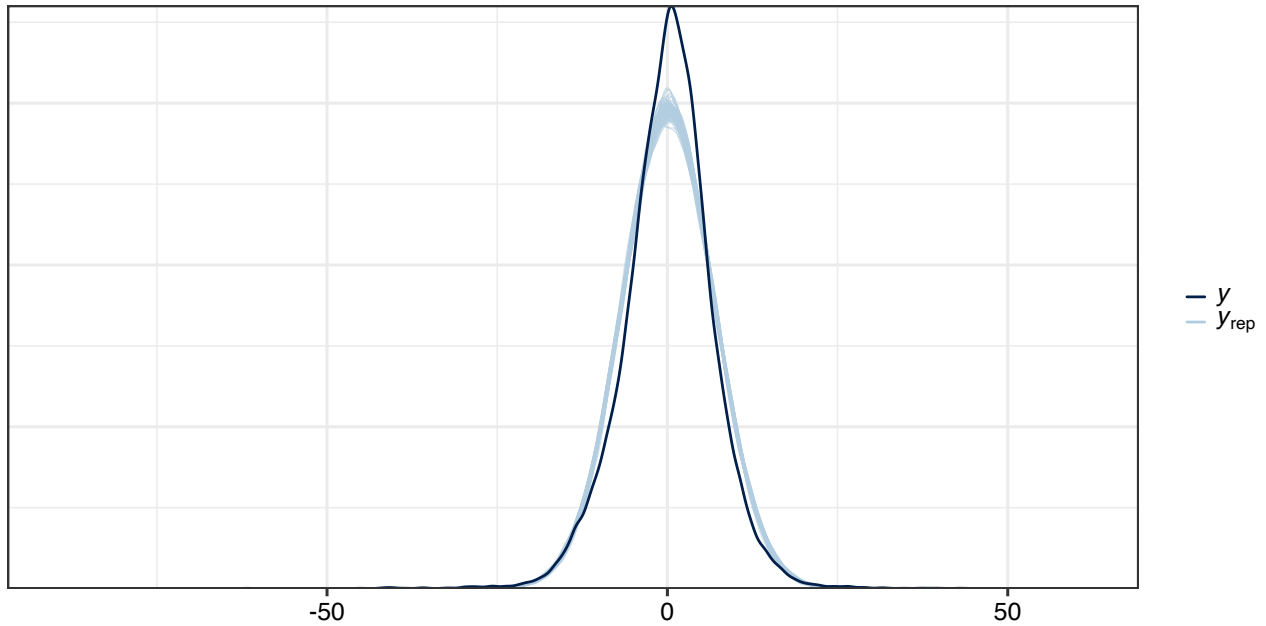

#### S4.1.4 Null model

```
if (!file.exists('../gams_fitted_models/gam_hi_null.RDS')){
  model.null <- brm(mV
    ~ 1
    + trial_number.Z
    + t2(x, y, Participant, bs = "re")
    + t2(x, y, Stimulus, bs = "re"),
    prior = prior.brms,
    sample_prior = TRUE,
    data = hindi.data,
    chains = 4, iter = 2000, cores = 4
  )
  saveRDS(model.null, '../gams_fitted_models/gam_hi_null.RDS.RDS')
}
model.hi.null <- readRDS('../gams_fitted_models/gam_hi_null.RDS')
summary(model.hi.null)
```

```
## Family: gaussian
## Links: mu = identity; sigma = identity
## Formula: mV ~ 1 + trial_number.Z + t2(x, y, Participant, bs = "re") + t2(x, y, Stimulus, bs = "re")
## Data: hindi.data (Number of observations: 31104)
## Samples: 4 chains, each with iter = 2000; warmup = 1000; thin = 1;
##           total post-warmup samples = 4000
##
## Smooth Terms:
##           Estimate Est.Error 1-95% CI u-95% CI Rhat Bulk_ESS Tail_ESS
## sds(t2xyParticipant_1)  0.22    0.10   0.03   0.42 1.00   1014   1295
## sds(t2xyStimulus_1)    0.06    0.05   0.00   0.17 1.00   2724   1666
##
## Population-Level Effects:
```

```

##           Estimate Est.Error l-95% CI u-95% CI Rhat Bulk_ESS Tail_ESS
## Intercept           0.13     0.04    0.07    0.21 1.00     6421     3106
## trial_number.Z     -0.12     0.04   -0.19   -0.04 1.00     7135     2605
##
## Family Specific Parameters:
##           Estimate Est.Error l-95% CI u-95% CI Rhat Bulk_ESS Tail_ESS
## sigma        6.70     0.03    6.64    6.75 1.00     9181     2847
##
## Samples were drawn using sampling(NUTS). For each parameter, Bulk_ESS
## and Tail_ESS are effective sample size measures, and Rhat is the potential
## scale reduction factor on split chains (at convergence, Rhat = 1).

```

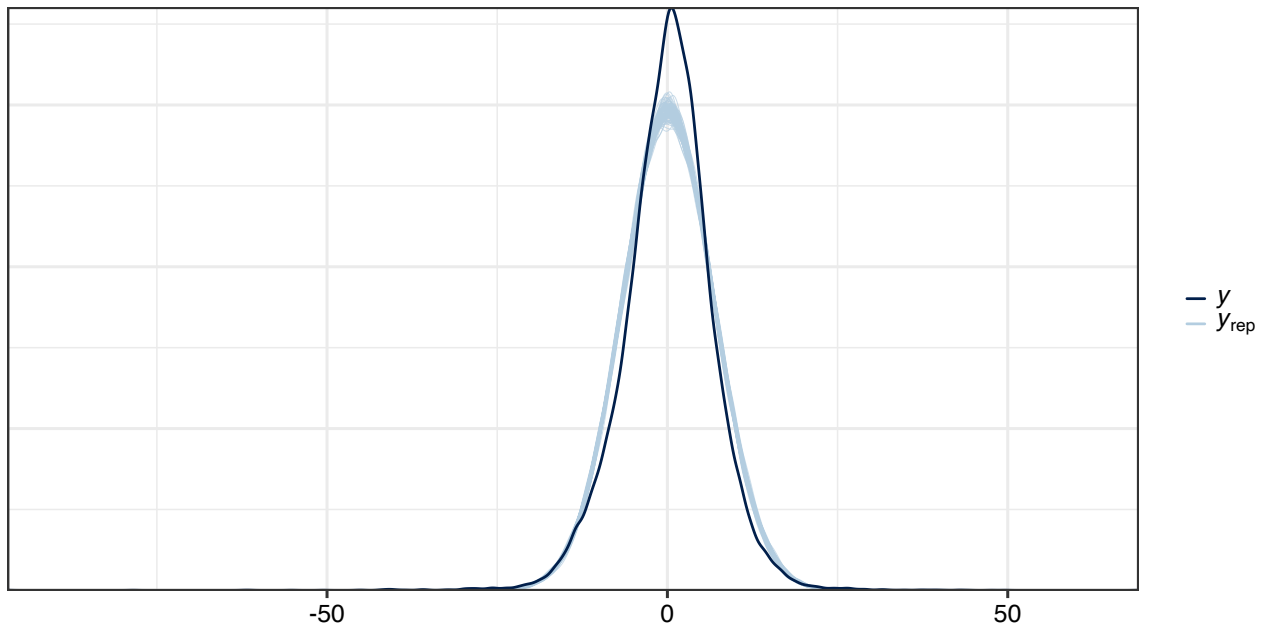

## S4.2 Model comparison with stacking

Here we perform model comparison and report the results:

```

if (!file.exists('../temp_data/weights_brms_hindi_stacking.RDS')){
  loo.agent <- loo(model.hi.agent)#, moment_match = T)
  loo.surplstm <- loo(model.hi.surplstm)#, moment_match = T)
  loo.surptr <- loo(model.hi.surptr)#, moment_match = T)
  loo.surpgpt <- loo(model.hi.surpgpt)
  loo.agent.surplstm <- loo(model.hi.agent.surplstm)#, moment_match = T)
  loo.agent.surptr <- loo(model.hi.agent.surptr)#, moment_match = T)
  loo.agent.surpgpt <- loo(model.hi.agent.surpgpt)
  loo.null <- loo(model.hi.null)#, moment_match = T)
  lweights <- loo_model_weights(list(
    "agent bias only"= loo.agent,
    "surprisal lstm" = loo.surplstm,
    "surprisal transformer" = loo.surptr,
    "surprisal gpt" = loo.surpgpt,
    "surprisal lstm and agent bias" = loo.agent.surplstm,
    "surprisal transformer and agent bias" = loo.agent.surptr,

```

```

"surprisal gpt and agent bias" = loo.agent.surpgpt,
"null" = loo.null), method='stacking')
dfweights <- as.data.frame(as.matrix(lweights))
saveRDS(dfweights, '../temp_data/weights_brms_hindi_stacking.RDS')
}

```

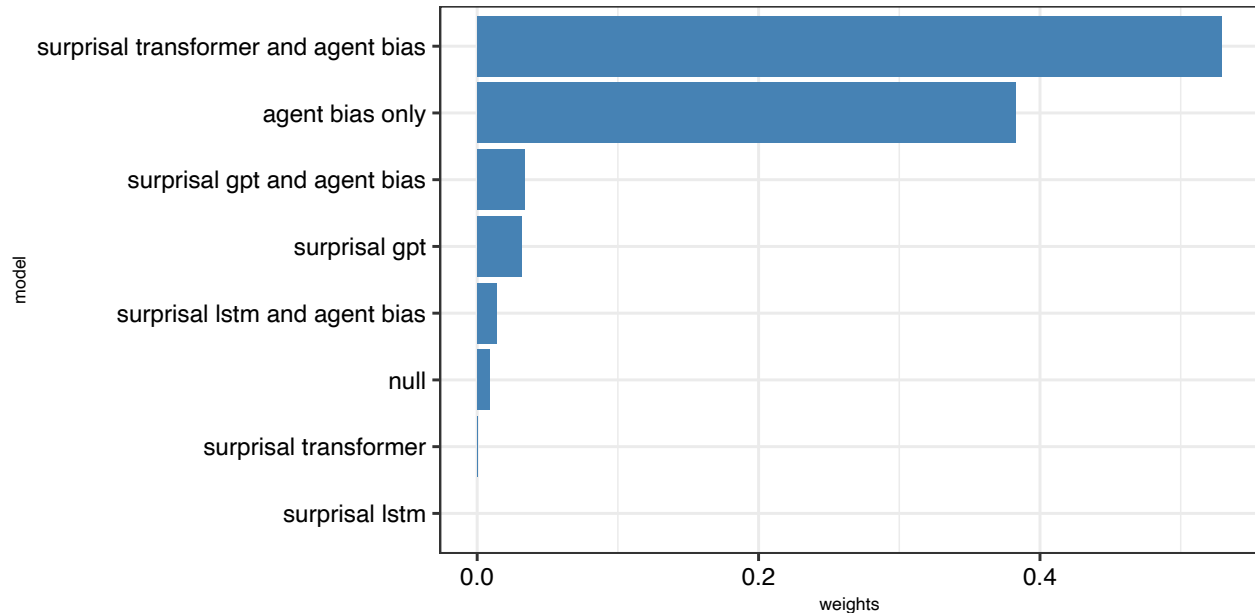

Figure S1: Hindi: Weights of models (method = stacking)

### S4.3 Model predictions

In what follows we compute and plot the mean posterior predicted effects across the smoothed scalp surfaces. In each plot, the left-hand side shows the difference between predicted effects. For surprisal we plot the difference between predictions at +2 and at -2 standard deviations from the mean. Panels on the right-hand side quantify the evidence of the effect in terms of the proportion of the posterior distributions that is below or above 0.

#### S4.3.1 Agent preference alone

```

n_samps <- 4000

newdata.hi.agent <- expand_grid(
  x = seq(min(hindi.data$x), max(hindi.data$x), length.out = 30),
  y = seq(min(hindi.data$y), max(hindi.data$y), length.out = 30),
  Participant = "AD0001",
  Stimulus_Cond = c("1:Abias", "1:nonAbias"),
  trial_number.Z = 0,
)

newdata.hi.agent <- newdata.hi.agent %>%
  separate(Stimulus_Cond, c('Stimulus', 'condition'), sep=':')

```

```

preds.hi.agent <- posterior_epred(model.hi.agent,
                                newdata=newdata.hi.agent, re.form=NA)

preds.hi.agent_long <- as.data.frame(preds.hi.agent) %>%
  mutate(samp = 1:nrow(preds.hi.agent)) %>%
  pivot_longer(-samp)

preds.hi.agent_long$x <- rep(newdata.hi.agent$x, n_samps)
preds.hi.agent_long$y <- rep(newdata.hi.agent$y, n_samps)
preds.hi.agent_long$condition <- rep(newdata.hi.agent$condition, n_samps)

preds.hi.agent_summary <- preds.hi.agent_long %>%
  group_by(x,y,samp) %>%
  mutate(diff_cond = value[condition == 'Abias'] -
         value[condition == 'nonAbias']) %>%
  ungroup() %>%
  group_by(x,y) %>%
  summarise(PP = ifelse(mean(diff_cond) > 0, mean(diff_cond > 0),
                      mean(diff_cond < 0)),
            mean_diff = mean(diff_cond)) %>%
  rename(xax = y) %>% #axes need to be changed so that electrodes fit scalp
  rename(yax = x) %>%
  mutate(x = xax) %>%
  mutate(y = yax) %>%
  mutate(x = -x) %>%
  mutate(y = -y)

plot.agent.hi <- preds.hi.agent_summary %>%
  mutate(sig = ifelse(PP > 0.80, 1, 0)) %>%
  ggplot(aes(x=x, y=y, fill=mean_diff, alpha = sig)) +
  geom_tile()+
  scale_fill_gradient2(low = '#0053d3', high = '#b22709', midpoint=0,
                      aesthetics='fill')+
  guides(alpha = "none") +
  theme(panel.grid = element_blank(), panel.border = element_blank(),
        strip.background = element_blank(),strip.text.x = element_text(size=5),
        axis.text.y=element_blank(),
        axis.ticks.y=element_blank(),
        axis.text.x=element_blank(),
        axis.ticks.x =element_blank(),
        plot.background = element_rect(fill = "transparent", colour = NA)) +
  labs(fill=(expression(paste(Delta, paste(mu, "V")))),
       x = element_blank(), y = element_blank())

plot.agent.hi.pp <- preds.hi.agent_summary %>%
  ggplot(aes(x=x, y=y, fill=PP)) +
  geom_tile()+
  scale_fill_gradientn(colours = c('white','grey', 'black'),limits = c(0.8, 1),
                      na.value='white' ) +
  labs(fill=(expression(paste('P(|',Delta,mu, V, '| > 0)', ))),
       x=element_blank(),
       y=element_blank()) +
  theme(panel.grid = element_blank(),

```

```

panel.border = element_blank(),
strip.background = element_blank(),
axis.ticks.x = element_blank(),
axis.ticks.y=element_blank(),
axis.text.x=element_blank(),
axis.text.y = element_blank(),
plot.background = element_rect(fill = "transparent", colour = NA))

```

```
wrap_plots(list(plot.agent.hi, plot.agent.hi.pp))
```

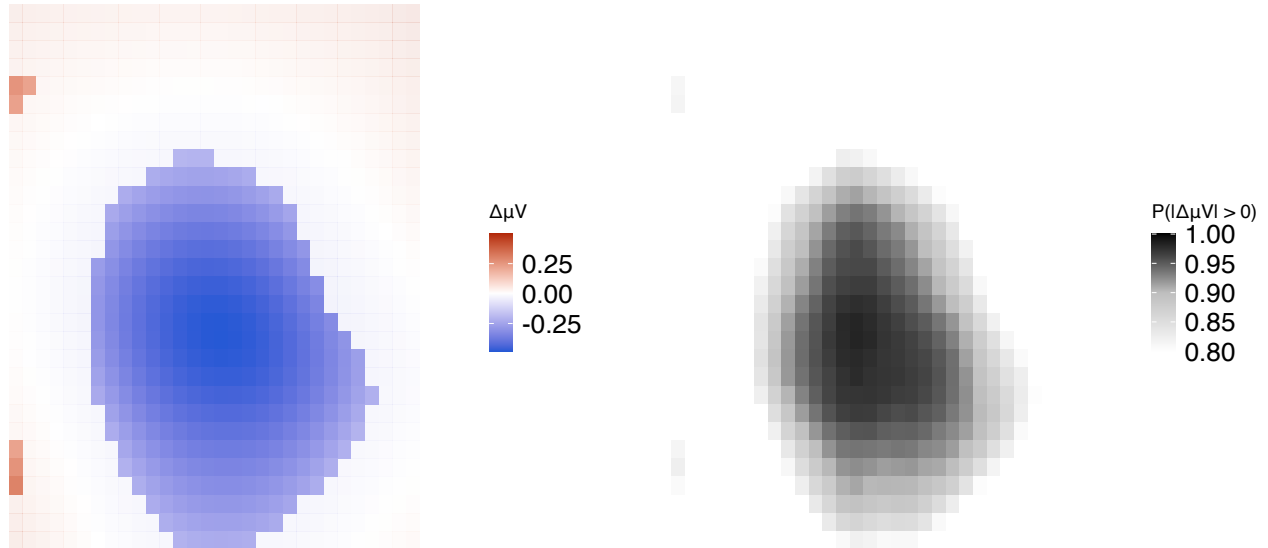

Figure S2: Left: Pair-wise fitted differences of  $\mu V$  for sentences with vs. sentences without the predicted reanalysis from model with agent preference predictor alone. Right: Percentage of posterior probability mass of  $\mu V$  mean difference below or above 0.

#### S4.3.2 LSTM-based surprisal alone

```

n_samps <- 4000

newdata.hi.surplstm <- expand_grid(
  x = seq(min(hindi.data$x), max(hindi.data$x), length.out = 30),
  y = seq(min(hindi.data$y), max(hindi.data$y), length.out = 30),
  surprisal.lstm.Z = seq(from=-2, to=2, length.out=17),
  Participant = "AD0001",
  Stimulus = c("1"),
  trial_number.Z = 0,
)

preds.hi.surplstm <- posterior_epred(model.hi.surplstm,
                                   newdata=newdata.hi.surplstm, re.form=NA)
preds.hi.surplstm_long <- as.data.frame(preds.hi.surplstm) %>%
  mutate(samp = 1:nrow(preds.hi.surplstm)) %>%
  pivot_longer(-samp)

```



```

preds.hi.surplstm_long$x <- rep(newdata.hi.surplstm$x, n_samps)
preds.hi.surplstm_long$y <- rep(newdata.hi.surplstm$y, n_samps)
preds.hi.surplstm_long$surprisal <- rep(newdata.hi.surplstm$surprisal.lstm.Z,
                                       n_samps)

summary_hi_surplstm <- preds.hi.surplstm_long %>%
  group_by(x,y,samp) %>%
  mutate(diff_surprisal = value[surprisal == 2] - value[surprisal == -2]) %>%
  ungroup() %>%
  group_by(x,y) %>%
  summarise(PP = ifelse(mean(diff_surprisal) > 0, mean(diff_surprisal > 0),
                      mean(diff_surprisal < 0)),
            mean_diff = mean(diff_surprisal)) %>%
  rename(xax = y) %>% #axes need to be changed so that electrodes fit scalp
  rename(yax = x) %>%
  mutate(x = xax) %>%
  mutate(y = yax) %>%
  mutate(x = -x) %>%
  mutate(y = -y)

plot.lstm.hi <- summary_hi_surplstm %>%
  mutate(sig = ifelse(PP>0.80, 1, 0)) %>%
  ggplot(aes(x=x, y=y, fill=mean_diff, alpha = sig)) +
  geom_tile()+
  scale_fill_gradient2(low = '#0053d3', high = '#b22709', midpoint=0,
                      aesthetics='fill')+
  guides(alpha = "none") +
  theme(panel.grid = element_blank(), panel.border = element_blank(),
        strip.background = element_blank(),strip.text.x = element_text(size=5),
        axis.text.y=element_blank(),
        axis.ticks.y=element_blank(),
        axis.text.x=element_blank(),
        axis.ticks.x =element_blank(),
        plot.background = element_rect(fill = "transparent", colour = NA)) +
  labs(fill=(expression(paste(Delta, paste(mu, "V")))),
        x = element_blank(), y = element_blank())

plot.lstm.hi.pp <- summary_hi_surplstm %>%
  ggplot(aes(x=x, y=y, fill=PP)) +
  geom_tile()+
  scale_fill_gradientn(colours = c('white','grey', 'black'),limits = c(0.8, 1),
                      na.value='white' ) +
  labs(fill=(expression(paste('P(|',Delta,mu, V, '| > 0)', ))),
        x=element_blank(),
        y=element_blank()) +
  theme(panel.grid = element_blank(), panel.border = element_blank(),
        strip.background = element_blank(),strip.text.x = element_text(size=5),
        axis.text.y=element_blank(),
        axis.ticks.y=element_blank(),
        plot.background = element_rect(fill = "transparent", colour = NA))

wrap_plots(list(plot.lstm.hi, plot.lstm.hi.pp))

```

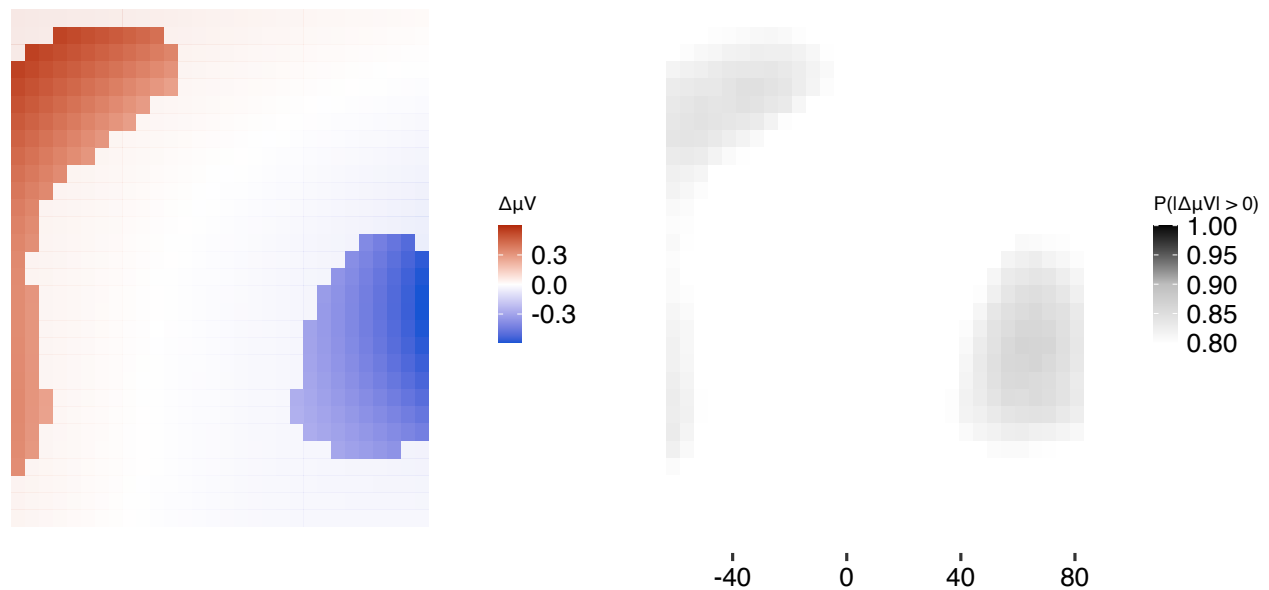

Figure S3: Left: Pair-wise fitted differences of  $\mu V$  for sentences with high vs. sentences with low (+2 vs. -2 std. dev. from the mean) from model with LSTM surprisal as predictor alone. Right: Percentage of posterior probability mass of  $\mu V$  mean difference below or above 0.

### S4.3.3 BERT-based surprisal alone

```
n_samps <- brms::nsamples(model.hi.surptr)

newdata.hi.surptr <- rename(newdata.hi.surplstm,
                           surprisal.tr.Z = surprisal.lstm.Z)
preds.hi.surptr <- posterior_epred(model.hi.surptr,
                                   newdata=newdata.hi.surptr, re.form=NA)
preds.hi.surptr_long <- as.data.frame(preds.hi.surptr) %>%
  mutate(samp = 1:nrow(preds.hi.surptr)) %>%
  pivot_longer(-samp)

preds.hi.surptr_long$x <- rep(newdata.hi.surptr$x, n_samps)
preds.hi.surptr_long$y <- rep(newdata.hi.surptr$y, n_samps)
preds.hi.surptr_long$surprisal <- rep(newdata.hi.surptr$surprisal.tr.Z, n_samps)

summary_hi_surptr <- preds.hi.surptr_long %>%
  group_by(x,y,samp) %>%
  mutate(diff_surprisal_low_mean = value[surprisal == 2] -
         value[surprisal == -2]) %>%
  ungroup() %>%
  group_by(x,y) %>%
  summarise(PP = ifelse(mean(diff_surprisal_low_mean) > 0,
                       mean(diff_surprisal_low_mean > 0),
                       mean(diff_surprisal_low_mean < 0)),
           mean_diff = mean(diff_surprisal_low_mean)) %>%
  rename(xax = y) %>% #axes need to be changed so that electrodes fit scalp
  rename(yax = x) %>%
  mutate(x = xax) %>%
```

```

mutate(y = yax) %>%
mutate(x = -x) %>%
mutate(y = -y)

plot.tr.hi <- summary_hi_surptr %>%
mutate(sig = ifelse(PP>0.80, 1, 0)) %>%
ggplot(aes(x=x, y=y, fill=mean_diff, alpha = sig)) +
geom_tile()+
scale_fill_gradient2(low = '#0053d3', high = '#b22709', midpoint=0,
aesthetics='fill')+
guides(alpha = "none") +
theme(panel.grid = element_blank(), panel.border = element_blank(),
strip.background = element_blank(),strip.text.x = element_text(size=5),
axis.text.y=element_blank(),
axis.ticks.y=element_blank(),
axis.text.x=element_blank(),
axis.ticks.x =element_blank(),
plot.background = element_rect(fill = "transparent", colour = NA)) +
labs(fill=(expression(paste(Delta, paste(mu, "V")))),
x = element_blank(), y = element_blank())

plot.tr.hi.pp <- summary_hi_surptr %>%
ggplot(aes(x=x, y=y, fill=PP)) +
geom_tile()+
scale_fill_gradientn(colours = c('white','grey', 'black'),limits = c(0.8, 1),
na.value='white' ) +
labs(fill=(expression(paste('P(|',Delta,mu, V, '| > 0)', ))),
x=element_blank(),
y=element_blank()) +
theme(panel.grid = element_blank(), panel.border = element_blank(),
strip.background = element_blank(),strip.text.x = element_text(size=5),
axis.text.y=element_blank(),
axis.ticks.y=element_blank(),
plot.background = element_rect(fill = "transparent", colour = NA))

wrap_plots(list(plot.tr.hi, plot.tr.hi.pp))

```

#### S4.3.4 GPT-based surprisal alone

```

n_samps <- brms::nsamples(model.hi.surpgpt)

newdata.hi.surpgpt <- rename(newdata.hi.surplstm,
surprisal.gpt.Z = surprisal.lstm.Z)
preds.hi.surpgpt <- posterior_epred(model.hi.surpgpt,
newdata=newdata.hi.surpgpt, re.form=NA)
preds.hi.surpgpt_long <- as.data.frame(preds.hi.surpgpt) %>%
mutate(samp = 1:nrow(preds.hi.surpgpt)) %>%
pivot_longer(-samp)

preds.hi.surpgpt_long$x <- rep(newdata.hi.surpgpt$x, n_samps)

```

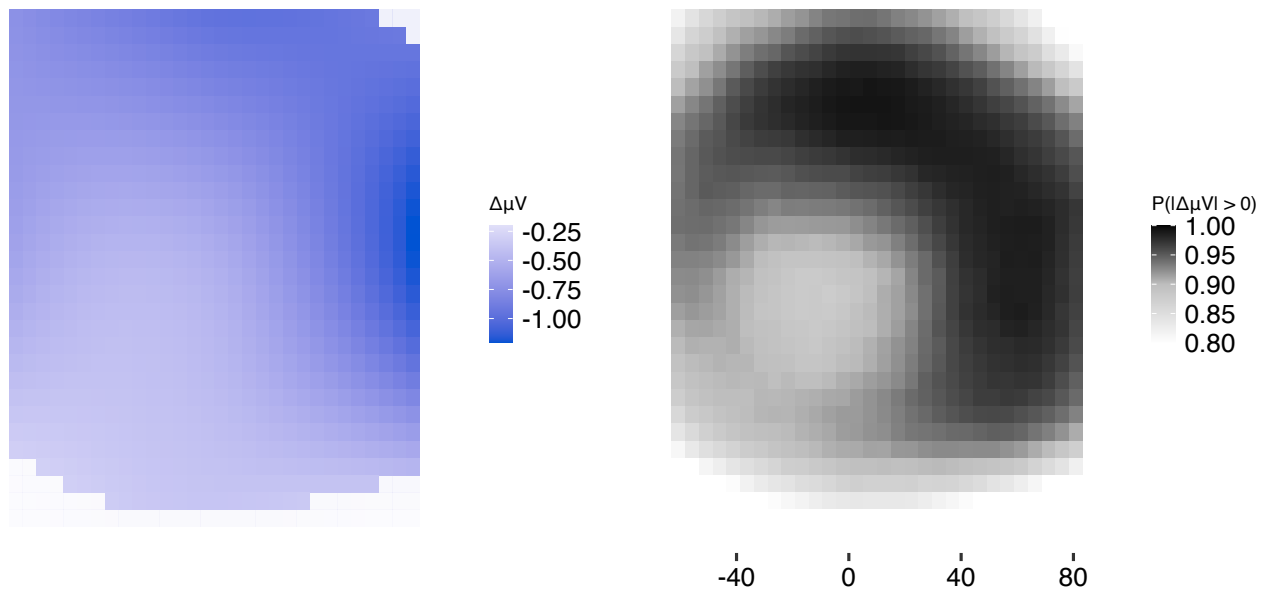

Figure S4: Left: Pair-wise fitted differences of  $\mu V$  for sentences with high vs. sentences with low (+2 vs. -2 std. dev. from the mean) from model with BERT surprisal as predictor alone. Right: Percentage of posterior probability mass of  $\mu V$  mean difference below or above 0.

```

preds.hi.surgpt_long$y <- rep(newdata.hi.surgpt$y, n_samps)
preds.hi.surgpt_long$surprisal <- rep(newdata.hi.surgpt$surprisal.gpt.Z, n_samps)

summary_hi_surgpt <- preds.hi.surgpt_long %>%
  group_by(x,y,samp) %>%
  mutate(diff_surprisal_low_mean = value[surprisal == 2] -
         value[surprisal == -2]) %>%
  ungroup() %>%
  group_by(x,y) %>%
  summarise(PP = ifelse(mean(diff_surprisal_low_mean) > 0,
                        mean(diff_surprisal_low_mean > 0),
                        mean(diff_surprisal_low_mean < 0)),
            mean_diff = mean(diff_surprisal_low_mean)) %>%
  rename(xax = y) %>% #axes need to be changed so that electrodes fit scalp
  rename(yax = x) %>%
  mutate(x = xax) %>%
  mutate(y = yax) %>%
  mutate(x = -x) %>%
  mutate(y = -y)

plot.gpt.hi <- summary_hi_surgpt %>%
  mutate(sig = ifelse(PP>0.80, 1, 0)) %>%
  ggplot(aes(x=x, y=y, fill=mean_diff, alpha = sig)) +
  geom_tile()+
  scale_fill_gradient2(low = '#0053d3', high = '#b22709', midpoint=0,
                      aesthetics='fill')+
  guides(alpha = "none") +
  theme(panel.grid = element_blank(), panel.border = element_blank(),
        strip.background = element_blank(),strip.text.x = element_text(size=5),
        axis.text.y=element_blank(),

```

```

axis.ticks.y=element_blank(),
axis.text.x=element_blank(),
axis.ticks.x =element_blank(),
plot.background = element_rect(fill = "transparent", colour = NA)) +
labs(fill=(expression(paste(Delta, paste(mu, "V")))),
x = element_blank(), y = element_blank())

plot.gpt.hi.pp <- summary_hi_surpgpt %>%
ggplot(aes(x=x, y=y, fill=PP)) +
geom_tile()+
scale_fill_gradientn(colours = c('white','grey', 'black'),limits = c(0.8, 1),
na.value='white' ) +
labs(fill=(expression(paste('P(|',Delta,mu, V, '| > 0)', ))),
x=element_blank(),
y=element_blank() ) +
theme(panel.grid = element_blank(), panel.border = element_blank(),
strip.background = element_blank(),strip.text.x = element_text(size=5),
axis.text.y=element_blank(),
axis.ticks.y=element_blank(),
plot.background = element_rect(fill = "gpttransparent", colour = NA))

wrap_plots(list(plot.gpt.hi, plot.gpt.hi.pp))

```

### S4.3.5 LSTM-based surprisal and Agent preference

```

model.hi.agent.surplstm <- readRDS('./gams_fitted_models/gam_hi_agent_lstm.RDS')

n_samps <- 4000

newdata.hi.agent.surplstm <- expand_grid(
  x = seq(min(hindi.data$x), max(hindi.data$x), length.out = 30),
  y = seq(min(hindi.data$y), max(hindi.data$y),length.out = 30),
  surprisal.lstm.Z = seq(from=-2,to=2, length.out=17),
  Participant = "AD0001",
  Stimulus_Cond = c("1:Abias", "1:nonAbias"),
  trial_number.Z = 0,
) %>%
  separate(Stimulus_Cond, c('Stimulus', 'condition'), sep=':')

preds.hi.agent.surplstm <- posterior_epred(model.hi.agent.surplstm,
                                         newdata=newdata.hi.agent.surplstm,
                                         re.form=NA)

preds.hi.agent.surplstm_long <- as.data.frame(preds.hi.agent.surplstm) %>%
  mutate(samp = 1:nrow(preds.hi.agent.surplstm)) %>%
  pivot_longer(-samp)

preds.hi.agent.surplstm_long$x <- rep(newdata.hi.agent.surplstm$x, n_samps)
preds.hi.agent.surplstm_long$y <- rep(newdata.hi.agent.surplstm$y, n_samps)
preds.hi.agent.surplstm_long$surprisal <-
  rep(newdata.hi.agent.surplstm$surprisal.lstm.Z, n_samps)

```

```

preds.hi.agent.surplstm_long$condition <-
  rep(newdata.hi.agent.surplstm$condition, n_samps)

summary_hi_agent_surplstm.abias <- preds.hi.agent.surplstm_long %>%
  filter(condition %in% 'Abias') %>%
  group_by(x,y,samp) %>%
  mutate(diff_surprisal_low_mean = value[surprisal == 2] -
         value[surprisal == -2]) %>%
  ungroup() %>%
  group_by(x,y) %>%
  summarise(PP = ifelse(mean(diff_surprisal_low_mean) > 0,
                       mean(diff_surprisal_low_mean > 0),
                       mean(diff_surprisal_low_mean < 0)),
           mean_diff = mean(diff_surprisal_low_mean)) %>%
  mutate(condition = 'Abias') %>%
  rename(xax = y) %>% #axes need to be changed so that electrodes fit scalp
  rename(yax = x) %>%
  mutate(x = xax) %>%
  mutate(y = yax) %>%
  mutate(x = -x) %>%
  mutate(y = -y)

summary_hi_agent_surplstm.nonabias <- preds.hi.agent.surplstm_long %>%
  filter(condition %in% 'nonAbias') %>%
  group_by(x,y,samp) %>%
  mutate(diff_surprisal_low_mean = value[surprisal == 2] -
         value[surprisal == -2]) %>%
  ungroup() %>%
  group_by(x,y) %>%
  summarise(PP = ifelse(mean(diff_surprisal_low_mean) > 0,
                       mean(diff_surprisal_low_mean > 0),
                       mean(diff_surprisal_low_mean < 0)),
           mean_diff = mean(diff_surprisal_low_mean)) %>%
  mutate(condition = 'nonAbias') %>%
  rename(xax = y) %>% #axes need to be changed so that electrodes fit scalp
  rename(yax = x) %>%
  mutate(x = xax) %>%
  mutate(y = yax) %>%
  mutate(x = -x) %>%
  mutate(y = -y)

summary_hi_agent_surplstm <- rbind(summary_hi_agent_surplstm.abias,
                                   summary_hi_agent_surplstm.nonabias)

plot.lstm.agent.surp.hi <- summary_hi_agent_surplstm %>%
  mutate(sig = ifelse(PP>0.80, 1, 0)) %>%
  ggplot(aes(x=x, y=y, fill=mean_diff, alpha = sig)) +
  geom_tile()+
  scale_fill_gradient2(low = '#0053d3', high = '#b22709', midpoint=0,
                      aesthetics='fill')+
  guides(alpha = "none") +
  theme(panel.grid = element_blank(), panel.border = element_blank(),
        strip.background = element_blank(),strip.text.x = element_text(size=5),

```

```

axis.text.y=element_blank(),
axis.ticks.y=element_blank(),
axis.text.x=element_blank(),
axis.ticks.x =element_blank(),
plot.background = element_rect(fill = "transparent", colour = NA)) +
labs(fill=(expression(paste(Delta, paste(mu, "V")))),
x = element_blank(), y = element_blank())

plot.lstm.agent.surp.hi.pp <- summary_hi_agent_surplstm %>%
ggplot(aes(x=x, y=y, fill=PP)) +
geom_tile()+
scale_fill_gradientn(colours = c('white','grey', 'black'),
limits = c(0.8, 1),
na.value='white' ) +
labs(fill=(expression(paste('P(|',Delta,mu, V, '| > 0)', ))),
x=element_blank(),
y=element_blank() ) +
theme(panel.grid = element_blank(), panel.border = element_blank(),
strip.background = element_blank(),strip.text.x = element_text(size=5),
axis.text.y=element_blank(),
axis.ticks.y=element_blank(),
plot.background = element_rect(fill = "transparent", colour = NA))

summary_hi_agent_surplstm.hi.conds <- preds.hi.agent_surplstm_long %>%
filter(surprisal == 0) %>%
group_by(x,y,samp) %>%
mutate(diff_condition = value[condition == 'Abias'] -
value[condition == 'nonAbias']) %>%
ungroup() %>%
group_by(x,y) %>%
summarise(PP = ifelse(mean(diff_condition) > 0,
mean(diff_condition > 0),
mean(diff_condition < 0)),
mean_diff = mean(diff_condition)) %>%
rename(xax = y) %>% #axes need to be changed so that electrodes fit scalp
rename(yax = x) %>%
mutate(x = xax) %>%
mutate(y = yax) %>%
mutate(x = -x) %>%
mutate(y = -y)

plot.lstm.agent.hi.cond <- summary_hi_agent_surplstm.hi.conds %>%
mutate(sig = ifelse(PP>0.80, 1, 0)) %>%
ggplot(aes(x=x, y=y, fill=mean_diff, alpha = sig)) +
geom_tile()+
scale_fill_gradient2(low = '#0053d3', high = '#b22709', midpoint=0,
aesthetics='fill')+
guides(alpha = "none") +
theme(panel.grid = element_blank(), panel.border = element_blank(),
strip.background = element_blank(),strip.text.x = element_text(size=5),
axis.text.y=element_blank(),
axis.ticks.y=element_blank(),
axis.text.x=element_blank(),

```

```

axis.ticks.x =element_blank(),
plot.background = element_rect(fill = "transparent", colour = NA)) +
labs(fill=(expression(paste(Delta, paste(mu, "V")))),
x = element_blank(), y = element_blank())

plot.lstm.agent.hi.cond.pp <- summary_hi_agent_surplstm.hi.conds %>%
ggplot(aes(x=x, y=y, fill=PP)) +
geom_tile()+
scale_fill_gradientn(colours = c('white','grey', 'black'),
limits = c(0.8, 1), na.value='white' ) +
labs(fill=(expression(paste('P(|',Delta,mu, V, '| > 0)', ))),
x=element_blank(),
y=element_blank()) +
theme(panel.grid = element_blank(), panel.border = element_blank(),
strip.background = element_blank(),strip.text.x = element_text(size=5),
axis.text.y=element_blank(),
axis.ticks.y=element_blank(),
plot.background = element_rect(fill = "transparent", colour = NA))

wrap_plots(list(plot.lstm.agent.hi.cond, plot.lstm.agent.surp.hi,
plot.lstm.agent.hi.cond.pp,plot.lstm.agent.surp.hi.pp))

```

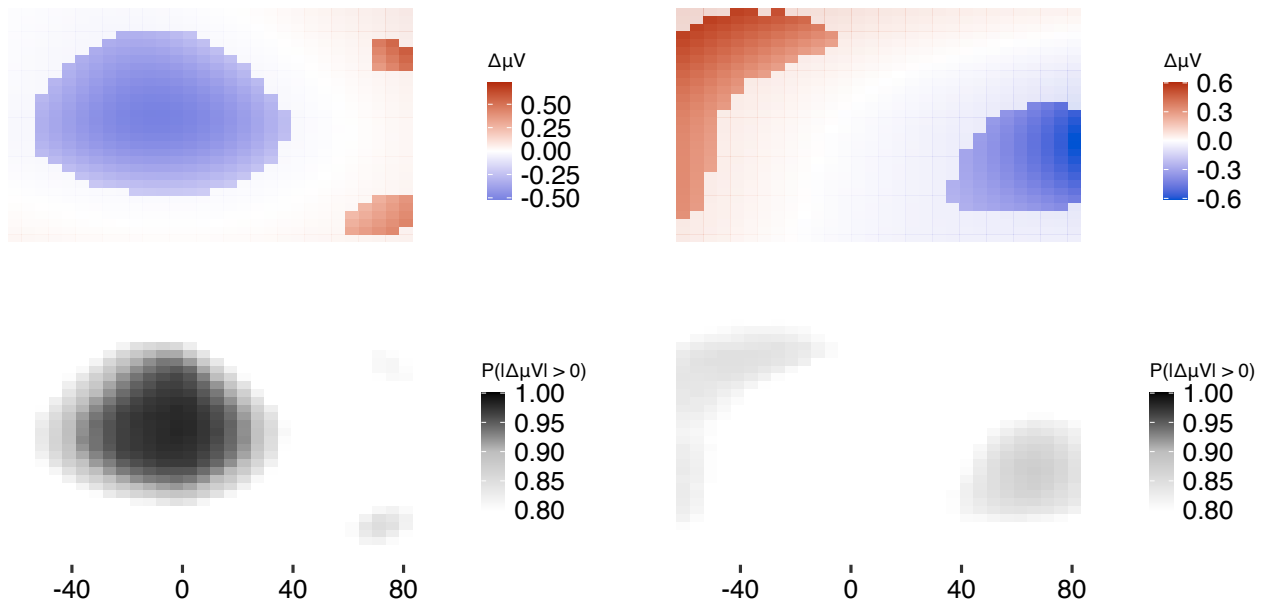

Figure S5: Left: Pair-wise fitted differences of  $\mu V$  for sentences with vs. sentences without the predicted reanalysis from model with LSTM surprisal as well as agent preference predictor. Right: Percentage of posterior probability mass of  $\mu V$  mean difference below or above 0.

#### S4.3.6 BERT-based surprisal and Agent preference

```

n_samps <- 4000

newdata.hi.agent.surptr <- newdata.hi.agent.surplstm %>%

```



```

  rename(surprisal.tr.Z = surprisal.lstm.Z)
preds.hi.agent.surptr <- posterior_epred(model.hi.agent.surptr,
                                       newdata=newdata.hi.agent.surptr,
                                       re.form=NA)

preds.hi.agent.surptr_long <- as.data.frame(preds.hi.agent.surptr) %>%
  mutate(samp = 1:nrow(preds.hi.agent.surptr)) %>%
  pivot_longer(-samp)

preds.hi.agent.surptr_long$x <- rep(newdata.hi.agent.surptr$x, n_samps)
preds.hi.agent.surptr_long$y <- rep(newdata.hi.agent.surptr$y, n_samps)
preds.hi.agent.surptr_long$surprisal <-
  rep(newdata.hi.agent.surptr$surprisal.tr.Z, n_samps)
preds.hi.agent.surptr_long$condition <-
  rep(newdata.hi.agent.surptr$condition, n_samps)

summary_hi_agent_surptr <- preds.hi.agent.surptr_long %>%
  filter(condition %in% 'Abias') %>%
  group_by(x,y,samp) %>%
  mutate(diff_surprisal_low_mean = value[surprisal == 2] -
         value[surprisal == -2]) %>%
  ungroup() %>%
  group_by(x,y) %>%
  summarise(PP = ifelse(mean(diff_surprisal_low_mean) > 0,
                        mean(diff_surprisal_low_mean > 0),
                        mean(diff_surprisal_low_mean < 0)),
            mean_diff = mean(diff_surprisal_low_mean)) %>%
  mutate('condition' = 'Abias') %>%
  rename(xax = y) %>% #axes need to be changed so that electrodes fit scalp
  rename(yax = x) %>%
  mutate(x = xax) %>%
  mutate(y = yax) %>%
  mutate(x = -x) %>%
  mutate(y = -y)

plot.tr.agent.surp.hi <- summary_hi_agent_surptr %>%
  mutate(sig = ifelse(PP>0.80, 1, 0)) %>%
  ggplot(aes(x=x, y=y, fill=mean_diff, alpha = sig)) +
  geom_tile()+
  scale_fill_gradient2(low = '#0053d3', high = '#b22709', midpoint=0,
                      aesthetics='fill')+
  guides(alpha = "none") +
  theme(panel.grid = element_blank(), panel.border = element_blank(),
        strip.background = element_blank(),strip.text.x = element_text(size=5),
        axis.text.y=element_blank(),
        axis.ticks.y=element_blank(),
        axis.text.x = element_blank(),
        axis.ticks.x = element_blank(),
        plot.background = element_rect(fill = "transparent", colour = NA)) +
  labs(fill = (expression(paste(Delta, paste(mu, "V")))),
       x= element_blank(),
       y = element_blank())

```

```

plot.tr.agent.surp.hi.pp <- summary_hi_agent_surptr %>%
  ggplot(aes(x=x, y=y, fill=PP)) +
  geom_tile()+
  scale_fill_gradientn(colours = c('white','grey', 'black'),limits = c(0.8, 1),
    na.value='white' ) +
  labs(fill=(expression(paste('P(|',Delta,mu, V, '| > 0)', ))),
    x=element_blank(),
    y=element_blank() ) +
  theme(panel.grid = element_blank(), panel.border = element_blank(),
    strip.background = element_blank(),strip.text.x = element_text(size=5),
    axis.text.y=element_blank(),
    axis.text.x=element_blank(),
    axis.ticks.y=element_blank(),
    axis.ticks.x=element_blank(),
    plot.background = element_rect(fill = "transparent", colour = NA))

summary_hi_agent_surptr.condition <- preds.hi.agent_surptr_long %>%
  filter(surprisal == 0) %>%
  group_by(x,y,samp) %>%
  mutate(diff_condition = value[condition == 'Abias'] -
    value[condition == 'nonAbias']) %>%
  ungroup() %>%
  group_by(x,y) %>%
  summarise(PP = ifelse(mean(diff_condition) > 0,
    mean(diff_condition > 0),
    mean(diff_condition < 0)),
    mean_diff = mean(diff_condition)) %>%
  rename(xax = y) %>% #axes need to be changed so that electrodes fit scalp
  rename(yax = x) %>%
  mutate(x = xax) %>%
  mutate(y = yax) %>%
  mutate(x = -x) %>%
  mutate(y = -y)

plot.tr.agent.hi.cond <- summary_hi_agent_surptr.condition %>%
  mutate(sig = ifelse(PP>0.80, 1, 0)) %>%
  ggplot(aes(x=x, y=y, fill=mean_diff, alpha = sig)) +
  geom_tile()+
  scale_fill_gradient2(low = '#0053d3', high = '#b22709', midpoint=0,
    aesthetics='fill')+
  guides(alpha = "none") +
  theme(panel.grid = element_blank(), panel.border = element_blank(),
    strip.background = element_blank(),strip.text.x = element_text(size=5),
    axis.text.y=element_blank(),
    axis.ticks.y=element_blank(),
    axis.text.x=element_blank(),
    axis.ticks.x =element_blank(),
    plot.background = element_rect(fill = "transparent", colour = NA)) +
  labs(fill=(expression(paste(Delta, paste(mu, "V")))),
    x = element_blank(), y = element_blank())

plot.tr.agent.hi.cond.pp <- summary_hi_agent_surptr.condition %>%
  ggplot(aes(x=x, y=y, fill=PP)) +

```

```

geom_tile()+
scale_fill_gradientn(colours = c('white','grey', 'black'),limits = c(0.8, 1),
                    na.value='white' ) +
#scale_fill_gradient2(low = 'white', high = 'black', limits = c(0.8, 1)) +
labs(fill=(expression(paste('P(|',Delta,mu, V, '| > 0)', ))),
     x=element_blank(),
     y=element_blank() ) +
theme(panel.grid = element_blank(), panel.border = element_blank(),
      strip.background = element_blank(),strip.text.x = element_text(size=5),
      axis.text.y=element_blank(),
      axis.text.x=element_blank(),
      axis.ticks.y=element_blank(),
      axis.ticks.x=element_blank(),
      plot.background = element_rect(fill = "transparent", colour = NA))

```

```

wrap_plots(list(plot.tr.agent.hi.cond, plot.tr.agent.surp.hi,
               plot.tr.agent.hi.cond.pp,plot.tr.agent.surp.hi.pp))

```

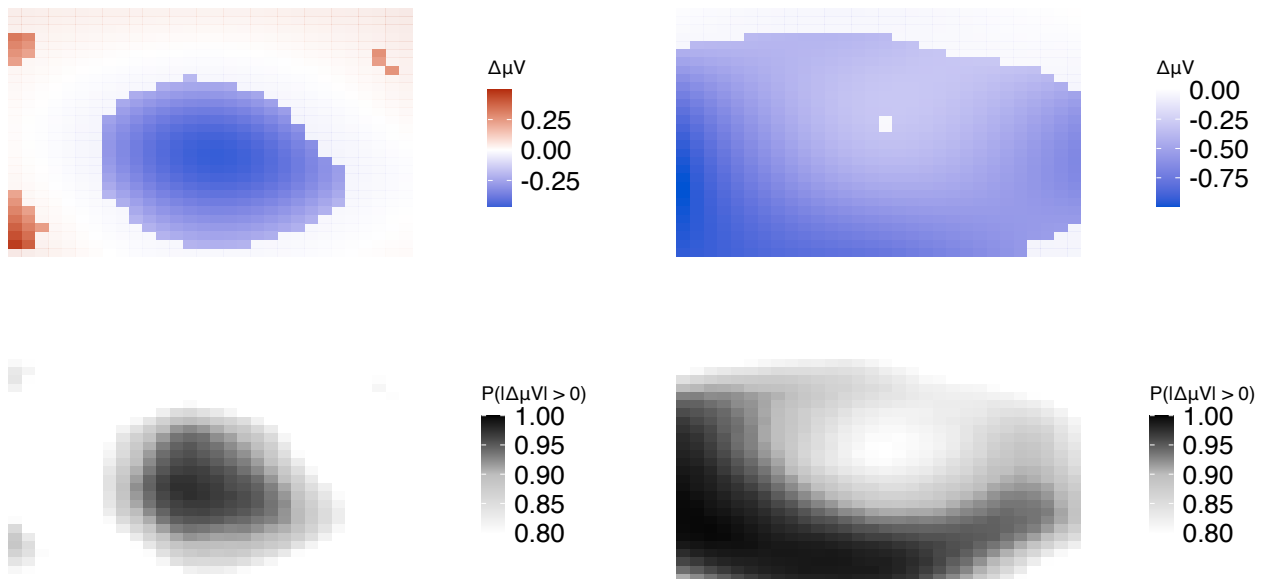

Figure S6: Left: Pair-wise fitted differences of  $\mu V$  for sentences with vs. sentences without the predicted reanalysis from model with BERT surprisal as well as agent preference predictor. Right: Percentage of posterior probability mass of  $\mu V$  mean difference below or above 0.

### S4.3.7 GPT-based surprisal and Agent preference

```

n_samps <- 4000

newdata.hi.agent.surpgpt <- newdata.hi.agent.surplstm %>%
  rename(surprisal.gpt.Z = surprisal.lstm.Z)
preds.hi.agent.surpgpt <- posterior_epred(model.hi.agent.surpgpt,
                                         newdata=newdata.hi.agent.surpgpt,
                                         re.form=NA)

```

```

preds.hi.agent.surpgpt_long <- as.data.frame(preds.hi.agent.surpgpt) %>%
  mutate(samp = 1:nrow(preds.hi.agent.surpgpt)) %>%
  pivot_longer(-samp)

preds.hi.agent.surpgpt_long$x <- rep(newdata.hi.agent.surpgpt$x, n_samps)
preds.hi.agent.surpgpt_long$y <- rep(newdata.hi.agent.surpgpt$y, n_samps)
preds.hi.agent.surpgpt_long$surprisal <-
  rep(newdata.hi.agent.surpgpt$surprisal.gpt.Z, n_samps)
preds.hi.agent.surpgpt_long$condition <-
  rep(newdata.hi.agent.surpgpt$condition, n_samps)

summary_hi_agent_surpgpt <- preds.hi.agent.surpgpt_long %>%
  filter(condition %in% 'Abias') %>%
  group_by(x,y,samp) %>%
  mutate(diff_surprisal_low_mean = value[surprisal == 2] -
         value[surprisal == -2]) %>%
  ungroup() %>%
  group_by(x,y) %>%
  summarise(PP = ifelse(mean(diff_surprisal_low_mean) > 0,
                        mean(diff_surprisal_low_mean > 0),
                        mean(diff_surprisal_low_mean < 0)),
            mean_diff = mean(diff_surprisal_low_mean)) %>%
  mutate('condition' = 'Abias') %>%
  rename(xax = y) %>% #axes need to be changed so that electrodes fit scalp
  rename(yax = x) %>%
  mutate(x = xax) %>%
  mutate(y = yax) %>%
  mutate(x = -x) %>%
  mutate(y = -y)

plot.gpt.agent.surp.hi <- summary_hi_agent_surpgpt %>%
  mutate(sig = ifelse(PP>0.80, 1, 0)) %>%
  ggplot(aes(x=x, y=y, fill=mean_diff, alpha = sig)) +
  geom_tile()+
  scale_fill_gradient2(low = '#0053d3', high = '#b22709', midpoint=0,
                      aesthetics='fill')+
  guides(alpha = "none") +
  theme(panel.grid = element_blank(), panel.border = element_blank(),
        strip.background = element_blank(),strip.text.x = element_text(size=5),
        axis.text.y=element_blank(),
        axis.ticks.y=element_blank(),
        axis.text.x = element_blank(),
        axis.ticks.x = element_blank(),
        plot.background = element_rect(fill = "transparent", colour = NA)) +
  labs(fill = (expression(paste(Delta, paste(mu, "V")))),
       x= element_blank(),
       y = element_blank())

plot.gpt.agent.surp.hi.pp <- summary_hi_agent_surpgpt %>%
  ggplot(aes(x=x, y=y, fill=PP)) +
  geom_tile()+
  scale_fill_gradientn(colours = c('white','grey', 'black'),limits = c(0.8, 1),
                      na.value='white' ) +

```

```

labs(fill=(expression(paste('P(|',Delta,mu, V, '| > 0)', ))),
      x=element_blank(),
      y=element_blank()) +
theme(panel.grid = element_blank(), panel.border = element_blank(),
      strip.background = element_blank(),strip.text.x = element_text(size=5),
      axis.text.y=element_blank(),
      axis.text.x=element_blank(),
      axis.ticks.y=element_blank(),
      axis.ticks.x=element_blank(),
      plot.background = element_rect(fill = "transparent", colour = NA))

summary_hi_agent_surpgpt.condition <- preds.hi.agent.surpgpt_long %>%
  filter(surprisal == 0) %>%
  group_by(x,y,samp) %>%
  mutate(diff_condition = value[condition == 'Abias'] -
          value[condition == 'nonAbias']) %>%
  ungroup() %>%
  group_by(x,y) %>%
  summarise(PP = ifelse(mean(diff_condition) > 0,
                       mean(diff_condition > 0),
                       mean(diff_condition < 0)),
            mean_diff = mean(diff_condition)) %>%
  rename(xax = y) %>% #axes need to be changed so that electrodes fit scalp
  rename(yax = x) %>%
  mutate(x = xax) %>%
  mutate(y = yax) %>%
  mutate(x = -x) %>%
  mutate(y = -y)

plot.gpt.agent.hi.cond <- summary_hi_agent_surpgpt.condition %>%
  mutate(sig = ifelse(PP>0.80, 1, 0)) %>%
  ggplot(aes(x=x, y=y, fill=mean_diff, alpha = sig)) +
  geom_tile()+
  scale_fill_gradient2(low = '#0053d3', high = '#b22709', midpoint=0,
                      aesthetics='fill')+
  guides(alpha = "none") +
  theme(panel.grid = element_blank(), panel.border = element_blank(),
        strip.background = element_blank(),strip.text.x = element_text(size=5),
        axis.text.y=element_blank(),
        axis.ticks.y=element_blank(),
        axis.text.x=element_blank(),
        axis.ticks.x =element_blank(),
        plot.background = element_rect(fill = "transparent", colour = NA)) +
  labs(fill=(expression(paste(Delta, paste(mu, "V")))),
        x = element_blank(), y = element_blank())

plot.gpt.agent.hi.cond.pp <- summary_hi_agent_surpgpt.condition %>%
  ggplot(aes(x=x, y=y, fill=PP)) +
  geom_tile()+
  scale_fill_gradientn(colours = c('white','grey', 'black'),limits = c(0.8, 1),
                      na.value='white' ) +
  #scale_fill_gradient2(low = 'white', high = 'black', limits = c(0.8, 1)) +
  labs(fill=(expression(paste('P(|',Delta,mu, V, '| > 0)', ))),

```

```

x=element_blank(),
y=element_blank() +
theme(panel.grid = element_blank(), panel.border = element_blank(),
strip.background = element_blank(),strip.text.x = element_text(size=5),
axis.text.y=element_blank(),
axis.text.x=element_blank(),
axis.ticks.y=element_blank(),
axis.ticks.x=element_blank(),
plot.background = element_rect(fill = "transparent", colour = NA))

```

```

wrap_plots(list(plot.gpt.agent.hi.cond, plot.gpt.agent.surp.hi,
plot.gpt.agent.hi.cond.pp,plot.gpt.agent.surp.hi.pp))

```

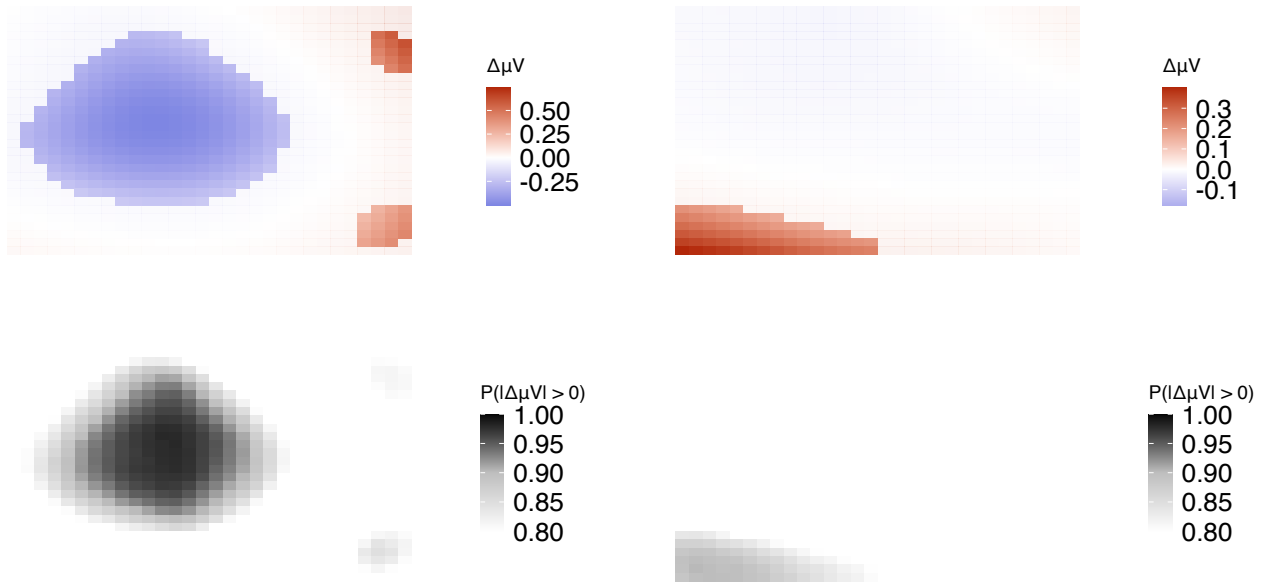

Figure S7: Left: Pair-wise fitted differences of  $\mu V$  for sentences with vs. sentences without the predicted reanalysis from model with GPT-2 surprisal as well as agent preference predictor. Right: Percentage of posterior probability mass of  $\mu V$  mean difference below or above 0.

#### S4.3.8 Strongest effect summary

Table S1: Hindi: This table contains the lowest mean delta microVolt (i.e. strongest effect size across the scalp, blue in the plots above) and the maximum proportion of the posterior distribution that is lower than 0 for the highest-ranked model, agent preference + bert surprisal.

| predictor                  | $\min(\text{mean}(\Delta\mu V))$ | $\max(P\Delta\mu V < 0)$ |
|----------------------------|----------------------------------|--------------------------|
| surprisal BERT             | -0.99                            | 0.998                    |
| agent preference condition | -0.46                            | 0.975                    |

## 5 Analysis 2: Predicting ERPs for Basque

# S5: Study 2: Predicting ERPs (Basque)\*

Eva Huber      Sebastian Sauppe      Arrate Isasi-Isasmendi  
Ina Bornkessel-Schlesewsky      Paola Merlo      Balthasar Bickel

2023-08-29

## Contents

|                                               |           |
|-----------------------------------------------|-----------|
| <b>S5 Basque</b>                              | <b>1</b>  |
| S5.1 Models . . . . .                         | 1         |
| S5.2 Model comparison with stacking . . . . . | 14        |
| S5.3 Model predictions . . . . .              | 15        |
| <b>S6 References</b>                          | <b>32</b> |

**REPRODUCIBILITY STATEMENT:** All of the models included here were fitted on an M1 processor using R Version 4.2.2 and brms version 2.14.0.

## S5 Basque

### S5.1 Models

We model the EEG results in micro-volt (mV below). For this, we fit Bayesian Generalised Additive Models in `brms` with different predictors and compare models by means of stacking in order to find the model with highest predictive performance. In the model below `condition` refers to whether or not we expect a reanalysis (see main text).

We check convergence by ensuring that Effective Sample Size  $ESS > 100$  and diagnostic  $\hat{R} < 1.05$ . Additionally, we perform posterior predictive checks to compare the predicted values to the observed data.

#### S5.1.1 Agent preference alone

```
basque.data <- readRDS('../results/basque_mv_surprisal_new.RDS')

if (!file.exists('../gams_fitted_models/gam_eu_agent.RDS')){
  prior.brms <- c(
    prior(normal(0,1), class = b),
    prior(exponential(1), class = sigma)
  )
  model.agent <- brm(mV
    ~ 1
```

\*This document was `rmarkdown::render`'ed from an R script 'main\_scripts/Basque\_analysis2.R' available at <https://osf.io/hbj67>.



```

+ Condition
+ trial_number.Z
+ t2(x, y, by = Condition, k = 10)
+ t2(x, y, Participant, bs = "re")
+ t2(x, y, Stimulus, bs = "re"),
data = basque.data,
sample_prior = TRUE,
prior = prior.brms,
chains = 4, iter = 2000, cores = 4
)
saveRDS(model.agent, '../gams_fitted_models/gam_eu_agent.RDS')
}
model.eu.agent <- readRDS('../gams_fitted_models/gam_eu_agent.RDS')
summary(model.eu.agent)

```

```

## Family: gaussian
## Links: mu = identity; sigma = identity
## Formula: mV ~ 1 + condition + trial_number.Z + t2(x, y, by = condition, k = 10) + t2(x, y, Participant)
## Data: basque.data (Number of observations: 68600)
## Samples: 4 chains, each with iter = 2000; warmup = 1000; thin = 1;
## total post-warmup samples = 4000
##
## Smooth Terms:
##
##           Estimate Est.Error 1-95% CI u-95% CI Rhat Bulk_ESS Tail_ESS
## sds(t2xyconditionAbias_1)      2.05      1.88      0.05      6.92 1.00      1464      2028
## sds(t2xyconditionAbias_2)     12.21      3.63      6.97     21.20 1.00      2956      3143
## sds(t2xyconditionAbias_3)     13.74      4.10      7.84     23.76 1.00      2563      2761
## sds(t2xyconditionnonAbias_1)   3.73      2.41      0.47      9.59 1.01       956      1516
## sds(t2xyconditionnonAbias_2)  10.82      3.37      5.85     18.77 1.00      2471      3082
## sds(t2xyconditionnonAbias_3)  12.50      3.74      7.09     21.46 1.00      2360      2794
## sds(t2xyParticipant_1)         0.48      0.12      0.26      0.73 1.00      1662      2253
## sds(t2xyStimulus_1)           0.09      0.06      0.00      0.24 1.00      2448      1654
##
## Population-Level Effects:
##
##           Estimate Est.Error 1-95% CI u-95% CI Rhat Bulk_ESS Tail_ESS
## Intercept          -2.34      0.11     -2.55     -2.11 1.00      3740      3141
## condition2           0.61      0.15      0.31      0.89 1.00      2690      3002
## trial_number.Z       0.60      0.04      0.52      0.67 1.00     13557      2617
## t2xy:conditionAbias_1  -1.32      0.14     -1.59     -1.02 1.00      3128      2652
## t2xy:conditionAbias_2  -0.06      0.13     -0.31      0.20 1.00      3810      3365
## t2xy:conditionAbias_3   0.08      0.21     -0.32      0.48 1.00      3593      3050
## t2xy:conditionnonAbias_1 -1.32      0.13     -1.58     -1.05 1.00      2723      2656
## t2xy:conditionnonAbias_2  0.12      0.11     -0.11      0.35 1.00      2467      2390
## t2xy:conditionnonAbias_3 -0.02      0.17     -0.35      0.32 1.00      3240      2991
##
## Family Specific Parameters:
##           Estimate Est.Error 1-95% CI u-95% CI Rhat Bulk_ESS Tail_ESS
## sigma      10.07      0.03     10.02     10.12 1.00      5959      2238
##
## Samples were drawn using sampling(NUTS). For each parameter, Bulk_ESS
## and Tail_ESS are effective sample size measures, and Rhat is the potential
## scale reduction factor on split chains (at convergence, Rhat = 1).

```

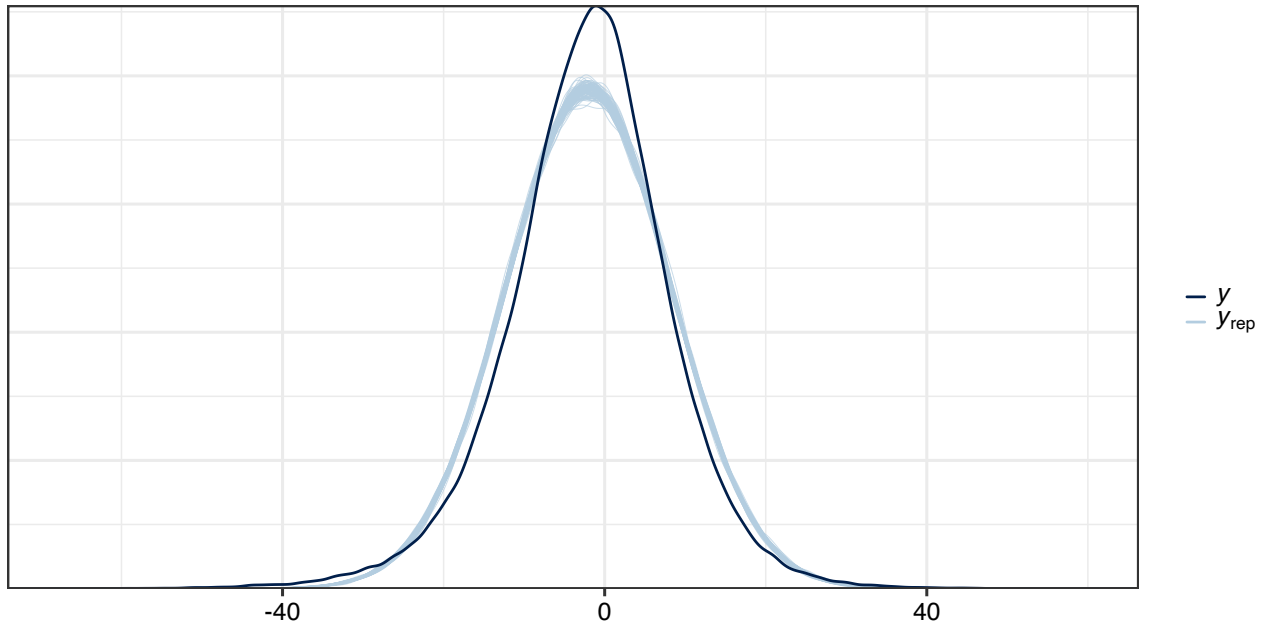

### S5.1.2 Surprisal alone

LSTM-based surprisal:

```
if (!file.exists('../gams_fitted_models/gam_eu_lstm.RDS')){
  prior.brms <- c(
    prior(normal(0,1), class = b),
    prior(exponential(1), class = sigma)
  )

  model.surprisal.lstm <- brm(mV
    ~ 1
    + trial_number.Z
    + surprisal.lstm.Z
    + t2(x, y, by = surprisal.lstm.Z, k = 10)
    + t2(x, y, Participant, bs = "re")
    + t2(x, y, Stimulus, bs = "re"),
    prior = prior.brms,
    sample_prior = TRUE,
    data = basque.data,
    chains = 4, iter = 2000, cores = 4
  )
  saveRDS(model.surprisal.lstm,
    '../gams_fitted_models/gam_eu_lstm.RDS')
}
model.eu.surp.lstm <- readRDS('../gams_fitted_models/gam_eu_lstm.RDS')

summary(model.eu.surp.lstm)
```

```
## Family: gaussian
## Links: mu = identity; sigma = identity
## Formula: mV ~ 1 + trial_number.Z + surprisal.lstm.Z + t2(x, y, by = surprisal.lstm.Z, k = 10) + t2(x
```

```

## Data: basque.data (Number of observations: 68600)
## Samples: 4 chains, each with iter = 2000; warmup = 1000; thin = 1;
## total post-warmup samples = 4000
##
## Smooth Terms:
##
## Estimate Est.Error 1-95% CI u-95% CI Rhat Bulk_ESS Tail_ESS
## sds(t2xysurprisal.lstm.Z_1) 0.56 0.50 0.02 1.80 1.00 2076 2554
## sds(t2xysurprisal.lstm.Z_2) 1.28 1.05 0.05 3.87 1.00 1783 2052
## sds(t2xysurprisal.lstm.Z_3) 0.97 0.93 0.03 3.46 1.00 2391 2098
## sds(t2xyParticipant_1) 0.46 0.12 0.25 0.71 1.01 1371 1578
## sds(t2xyStimulus_1) 0.09 0.07 0.00 0.25 1.00 2958 1878
##
## Population-Level Effects:
##
## Estimate Est.Error 1-95% CI u-95% CI Rhat Bulk_ESS Tail_ESS
## Intercept -2.07 0.04 -2.14 -2.00 1.00 9619 2764
## trial_number.Z 0.59 0.04 0.52 0.67 1.00 10395 3135
## surprisal.lstm.Z 0.07 0.70 -1.28 1.45 1.00 4663 2628
## t2xy:surprisal.lstm.Z_1 0.05 0.68 -1.29 1.37 1.00 4691 2558
## t2xy:surprisal.lstm.Z_2 0.14 0.05 0.05 0.23 1.00 6972 3057
## t2xy:surprisal.lstm.Z_3 -0.04 0.05 -0.13 0.05 1.00 5699 2760
## t2xy:surprisal.lstm.Z_4 0.01 0.06 -0.10 0.12 1.00 7306 2938
##
## Family Specific Parameters:
##
## Estimate Est.Error 1-95% CI u-95% CI Rhat Bulk_ESS Tail_ESS
## sigma 10.17 0.03 10.11 10.22 1.00 6894 2248
##
## Samples were drawn using sampling(NUTS). For each parameter, Bulk_ESS
## and Tail_ESS are effective sample size measures, and Rhat is the potential
## scale reduction factor on split chains (at convergence, Rhat = 1).

```

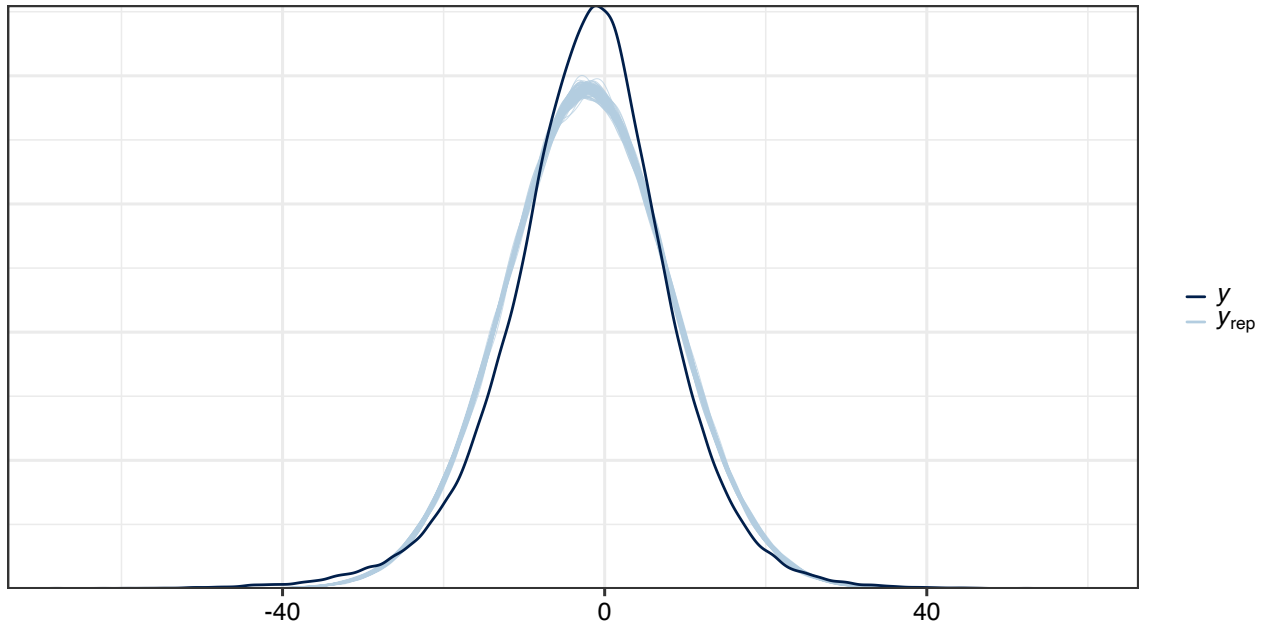

RoBERTa-based surprisal

```

if (!file.exists('../gams_fitted_models/gam_eu_roberta.RDS')){
  prior.brms <- c(
    prior(normal(0,1), class = b),
    prior(exponential(1), class = sigma)
  )

  model.surprisal.tr <- brm(mV
    ~ 1
    + trial_number.Z
    + surprisal.tr.Z
    + t2(x, y, by = surprisal.tr.Z, k = 10)
    + t2(x, y, Participant, bs = "re")
    + t2(x, y, Stimulus, bs = "re"),
    prior = prior.brms,
    sample_prior = TRUE,
    data = basque.data,
    chains = 4, iter = 2000, cores = 4
  )
  saveRDS(model.surprisal.tr,
    '../gams_fitted_models/gam_eu_roberta.RDS')
}
model.eu.surp.roberta <- readRDS('../gams_fitted_models/gam_eu_roberta.RDS')
summary(model.eu.surp.roberta)

```

```

## Family: gaussian
## Links: mu = identity; sigma = identity
## Formula: mV ~ 1 + trial_number.Z + surprisal.tr.Z + t2(x, y, by = surprisal.tr.Z, k = 10) + t2(x, y,
## Data: basque.data (Number of observations: 68600)
## Samples: 4 chains, each with iter = 2000; warmup = 1000; thin = 1;
## total post-warmup samples = 4000
##
## Smooth Terms:
## Estimate Est.Error 1-95% CI u-95% CI Rhat Bulk_ESS Tail_ESS
## sds(t2xysurprisal.tr.Z_1) 0.54 0.50 0.02 1.84 1.00 1852 2695
## sds(t2xysurprisal.tr.Z_2) 1.12 1.04 0.04 3.84 1.00 2393 2657
## sds(t2xysurprisal.tr.Z_3) 1.02 0.95 0.03 3.43 1.00 2256 2398
## sds(t2xyParticipant_1) 0.46 0.12 0.25 0.70 1.00 1847 2311
## sds(t2xyStimulus_1) 0.08 0.06 0.00 0.24 1.00 2296 2350
##
## Population-Level Effects:
## Estimate Est.Error 1-95% CI u-95% CI Rhat Bulk_ESS Tail_ESS
## Intercept -2.07 0.04 -2.15 -1.99 1.00 10847 2439
## trial_number.Z 0.60 0.04 0.52 0.68 1.00 13640 2513
## surprisal.tr.Z -0.16 0.73 -1.61 1.28 1.00 5454 3263
## t2xy:surprisal.tr.Z_1 -0.14 0.71 -1.54 1.26 1.00 5543 3236
## t2xy:surprisal.tr.Z_2 0.08 0.05 -0.01 0.17 1.00 7206 3115
## t2xy:surprisal.tr.Z_3 -0.01 0.04 -0.10 0.07 1.00 7821 3252
## t2xy:surprisal.tr.Z_4 0.04 0.06 -0.07 0.15 1.00 8455 3028
##
## Family Specific Parameters:
## Estimate Est.Error 1-95% CI u-95% CI Rhat Bulk_ESS Tail_ESS
## sigma 10.17 0.03 10.11 10.22 1.00 6562 2531
##

```

```
## Samples were drawn using sampling(NUTS). For each parameter, Bulk_ESS
## and Tail_ESS are effective sample size measures, and Rhat is the potential
## scale reduction factor on split chains (at convergence, Rhat = 1).
```

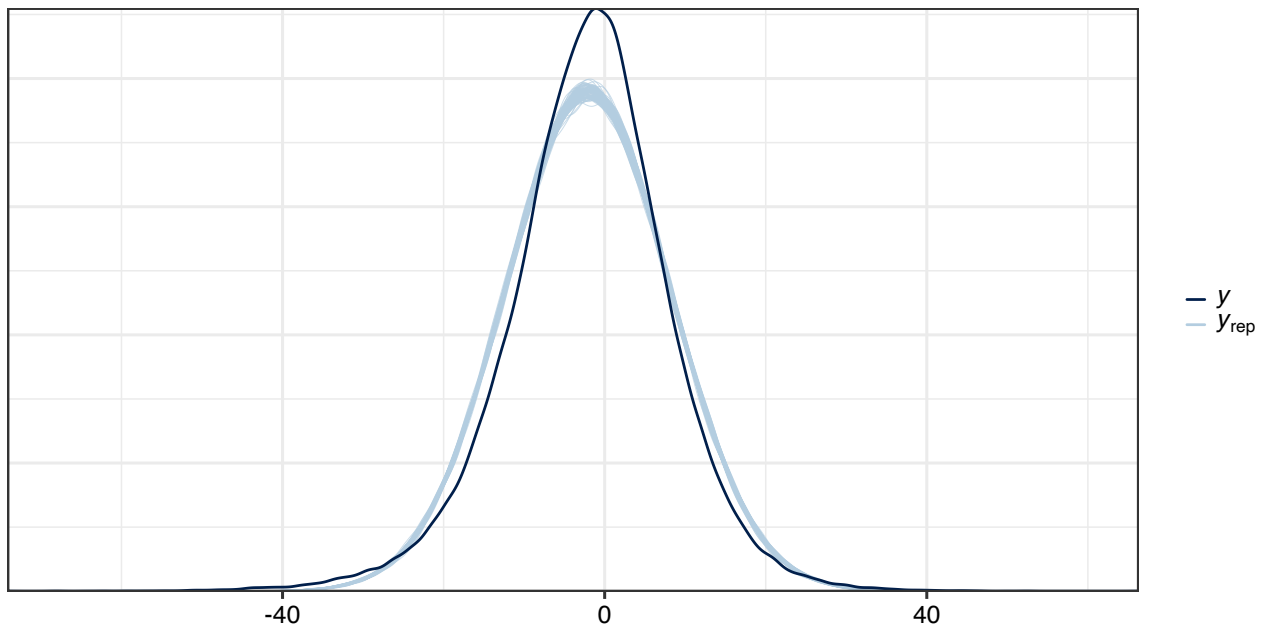

GPT-based surprisal:

```
if (!file.exists('../gams_fitted_models/gam_eu_gpt.RDS')){
  prior.brms <- c(
    prior(normal(0,1), class = b),
    prior(exponential(1), class = sigma)
  )
  model.surprisal.gpt <- brm(mV
    ~ 1
    + trial_number.Z
    + surprisal.gpt.Z
    + t2(x, y, by = surprisal.gpt.Z, k = 10)
    + t2(x, y, Participant, bs = "re")
    + t2(x, y, Stimulus, bs = "re"),
    prior = prior.brms,
    sample_prior = TRUE,
    data = basque.data,
    chains = 4, iter = 2000, cores = 4
  )
  saveRDS(model.surprisal.tr,
    '../gams_fitted_models/gam_eu_gpt.RDS')
}
model.eu.surp.gpt <- readRDS('../gams_fitted_models/gam_eu_gpt.RDS')
summary(model.eu.surp.gpt)
```

```
## Family: gaussian
## Links: mu = identity; sigma = identity
## Formula: mV ~ 1 + trial_number.Z + surprisal.gpt.Z + t2(x, y, by = surprisal.gpt.Z, k = 10) + t2(x,
## Data: basque.data (Number of observations: 68600)
```

```

## Samples: 4 chains, each with iter = 2000; warmup = 1000; thin = 1;
##       total post-warmup samples = 4000
##
## Smooth Terms:
##           Estimate Est.Error l-95% CI u-95% CI Rhat Bulk_ESS Tail_ESS
## sds(t2xysurprisal.gpt.Z_1)    0.52    0.49    0.02    1.80 1.00    2530    2471
## sds(t2xysurprisal.gpt.Z_2)    1.08    0.99    0.04    3.71 1.00    2447    2436
## sds(t2xysurprisal.gpt.Z_3)    1.80    1.27    0.15    5.19 1.00    1844    1979
## sds(t2xyParticipant_1)        0.46    0.12    0.24    0.71 1.00    1534    1837
## sds(t2xyStimulus_1)          0.09    0.06    0.00    0.24 1.00    3184    2018
##
## Population-Level Effects:
##           Estimate Est.Error l-95% CI u-95% CI Rhat Bulk_ESS Tail_ESS
## Intercept                -2.07    0.04   -2.15   -2.00 1.00    11046    2869
## trial_number.Z            0.59    0.04    0.52    0.67 1.00    11606    2511
## surprisal.gpt.Z          -0.04    0.72   -1.46    1.37 1.00    5872    3240
## t2xy:surprisal.gpt.Z_1   -0.04    0.70   -1.42    1.34 1.00    5891    3296
## t2xy:surprisal.gpt.Z_2    0.10    0.05    0.01    0.20 1.00    7264    3391
## t2xy:surprisal.gpt.Z_3    0.00    0.04   -0.09    0.09 1.00    7976    3282
## t2xy:surprisal.gpt.Z_4    0.00    0.06   -0.11    0.12 1.00    7503    3123
##
## Family Specific Parameters:
##           Estimate Est.Error l-95% CI u-95% CI Rhat Bulk_ESS Tail_ESS
## sigma    10.17    0.03   10.12   10.22 1.00    6110    2502
##
## Samples were drawn using sampling(NUTS). For each parameter, Bulk_ESS
## and Tail_ESS are effective sample size measures, and Rhat is the potential
## scale reduction factor on split chains (at convergence, Rhat = 1).

```

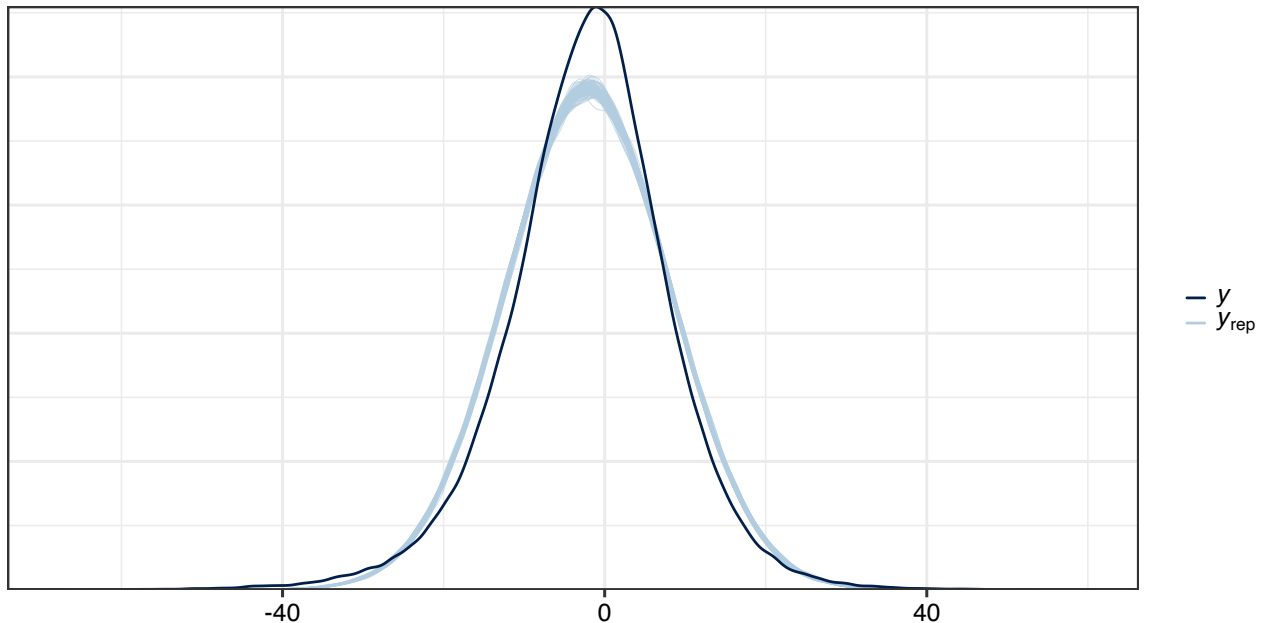

### S5.1.3 Agent preference and surprisal

LSTM-based surprisal

```

if (!file.exists('../gams_fitted_models/gam_eu_agent_lstm.RDS')){
  prior.brms <- c(
    prior(normal(0,1), class = b),
    prior(exponential(1), class = sigma)
  )
  model.agent.surprisal.lstm <- brm(mV
    ~ 1
    + trial_number.Z
    + surprisal.lstm.Z
    + Condition
    + t2(x, y, by = Condition, k = 10)
    + t2(x, y, by = surprisal.lstm.Z, k = 10)
    + t2(x, y, Participant, bs = "re")
    + t2(x, y, Stimulus, bs = "re"),
    prior = prior.brms,
    sample_prior = TRUE,
    data = basque.data,
    chains = 4, iter = 2000, cores = 4
  )
  saveRDS(model.agent.surprisal.lstm,
    '../gams_fitted_models/gam_eu_agent_lstm.RDS')
}
model.eu.agent.surp.lstm <-
  readRDS('../gams_fitted_models/gam_eu_agent_lstm.RDS')
summary(model.eu.agent.surp.lstm)

```

```

## Family: gaussian
## Links: mu = identity; sigma = identity
## Formula: mV ~ 1 + trial_number.Z + surprisal.lstm.Z + condition + t2(x, y, by = condition, k = 10) +
## Data: basque.data (Number of observations: 68600)
## Samples: 4 chains, each with iter = 2000; warmup = 1000; thin = 1;
## total post-warmup samples = 4000
##
## Smooth Terms:
##
## Estimate Est.Error l-95% CI u-95% CI Rhat Bulk_ESS Tail_ESS
## sds(t2xyconditionAbias_1) 2.04 1.82 0.07 6.77 1.00 1180 2113
## sds(t2xyconditionAbias_2) 12.13 3.68 6.81 20.92 1.00 3145 2951
## sds(t2xyconditionAbias_3) 13.60 4.10 7.78 23.67 1.00 2725 3012
## sds(t2xyconditionnonAbias_1) 3.86 2.48 0.46 9.99 1.00 792 1241
## sds(t2xyconditionnonAbias_2) 10.74 3.29 5.98 18.73 1.00 2664 2617
## sds(t2xyconditionnonAbias_3) 12.51 3.81 7.07 21.87 1.00 2167 2617
## sds(t2xysurprisal.lstm.Z_1) 0.54 0.50 0.02 1.85 1.00 2353 2307
## sds(t2xysurprisal.lstm.Z_2) 1.29 1.07 0.04 4.00 1.00 1896 1654
## sds(t2xysurprisal.lstm.Z_3) 0.94 0.88 0.03 3.29 1.00 2077 2333
## sds(t2xyParticipant_1) 0.48 0.12 0.26 0.73 1.00 1755 2502
## sds(t2xyStimulus_1) 0.08 0.06 0.00 0.23 1.00 2811 2091
##
## Population-Level Effects:
## Estimate Est.Error l-95% CI u-95% CI Rhat Bulk_ESS Tail_ESS
## Intercept -2.36 0.11 -2.56 -2.13 1.00 4202 3111
## trial_number.Z 0.59 0.04 0.52 0.67 1.00 9432 2768
## surprisal.lstm.Z 0.05 0.72 -1.35 1.45 1.00 5106 2747
## condition2 0.63 0.15 0.33 0.92 1.00 2711 3048

```

```

## t2xy:conditionAbias_1      1.33      0.15      1.03      1.61 1.00      3168      2845
## t2xy:conditionAbias_2     -0.05      0.13     -0.31      0.20 1.00      3840      2963
## t2xy:conditionAbias_3     -0.08      0.20     -0.47      0.33 1.00      3958      2999
## t2xy:conditionnonAbias_1   1.31      0.13      1.05      1.59 1.00      2644      2803
## t2xy:conditionnonAbias_2   0.12      0.11     -0.09      0.36 1.00      2986      3269
## t2xy:conditionnonAbias_3   0.01      0.17     -0.32      0.34 1.00      3186      2860
## t2xy:surprisal.lstm.Z_1     0.09      0.70     -1.27      1.45 1.00      5097      2789
## t2xy:surprisal.lstm.Z_2    -0.14      0.05     -0.23     -0.05 1.00      7804      3239
## t2xy:surprisal.lstm.Z_3    -0.04      0.04     -0.13      0.05 1.00      8046      3055
## t2xy:surprisal.lstm.Z_4    -0.01      0.06     -0.12      0.10 1.00      7906      3082
##
## Family Specific Parameters:
##      Estimate Est.Error 1-95% CI u-95% CI Rhat Bulk_ESS Tail_ESS
## sigma    10.07      0.03    10.01    10.12 1.00     5700     2257
##
## Samples were drawn using sampling(NUTS). For each parameter, Bulk_ESS
## and Tail_ESS are effective sample size measures, and Rhat is the potential
## scale reduction factor on split chains (at convergence, Rhat = 1).

```

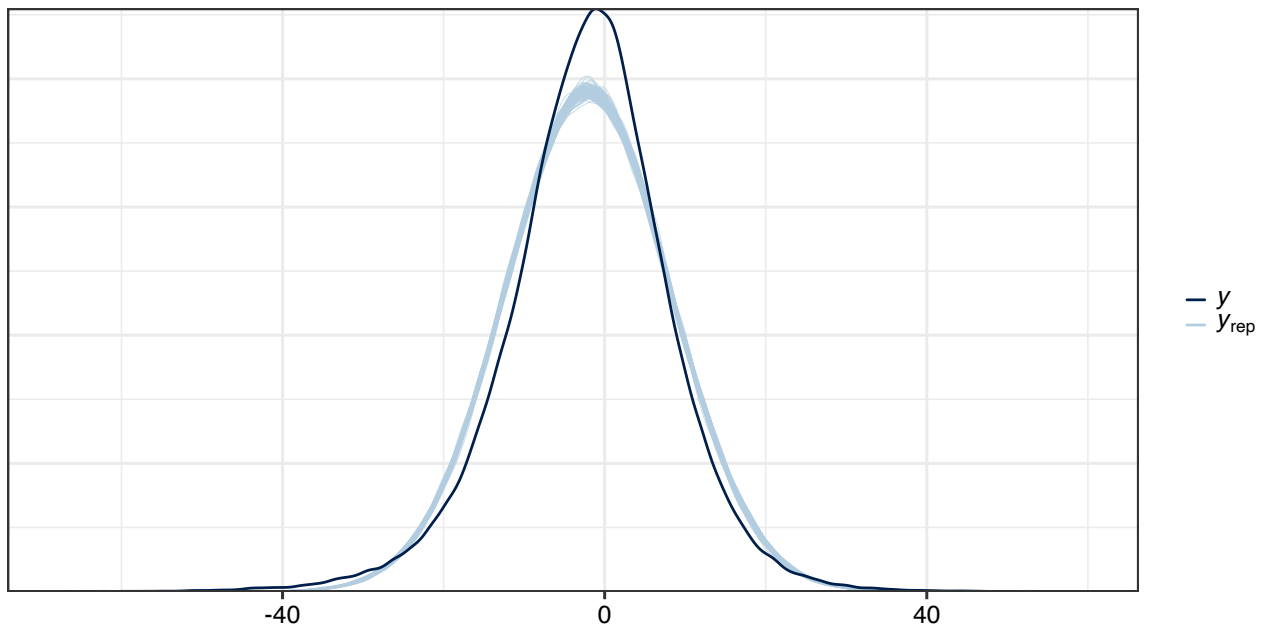

RoBERTa-based surprisal:

```

if (!file.exists('../gams_fitted_models/gam_eu_agent_roberta.RDS')){
  prior.brms <- c(
    prior(normal(0,1), class = b),
    prior(exponential(1), class = sigma)
  )
  model.agent.surprisal.tr <- brm(mV
    ~ 1
    + trial_number.Z
    + surprisal.tr.Z
    + Condition
    + t2(x, y, by = Condition, k = 10)
    + t2(x, y, by = surprisal.tr.Z, k = 10)
    + t2(x, y, Participant, bs = "re")
  )
}

```



```

+ t2(x, y, Stimulus, bs = "re"),
prior = prior.brms,
sample_prior = TRUE,
data = basque.data,
chains = 4, iter = 2000, cores = 4
)
saveRDS(model.agent.surprisal.tr,
        './gams_fitted_models/gam_eu_agent_roberta.RDS')
}
model.eu.agent.surp.roberta <-
  readRDS('./gams_fitted_models/gam_eu_agent_roberta.RDS')
summary(model.eu.agent.surp.roberta)

```

```

## Family: gaussian
## Links: mu = identity; sigma = identity
## Formula: mV ~ 1 + trial_number.Z + surprisal.tr.Z + condition + t2(x, y, by = condition, k = 10) + t
## Data: basque.data (Number of observations: 68600)
## Samples: 4 chains, each with iter = 2000; warmup = 1000; thin = 1;
## total post-warmup samples = 4000
##
## Smooth Terms:
##
## Estimate Est.Error l-95% CI u-95% CI Rhat Bulk_ESS Tail_ESS
## sds(t2xyconditionAbias_1) 2.04 1.85 0.08 6.83 1.00 1367 2188
## sds(t2xyconditionAbias_2) 12.29 3.72 6.83 20.99 1.00 2832 2968
## sds(t2xyconditionAbias_3) 13.49 4.03 7.77 23.43 1.00 2768 3218
## sds(t2xyconditionnonAbias_1) 3.68 2.44 0.43 9.52 1.00 790 1460
## sds(t2xyconditionnonAbias_2) 10.84 3.37 5.88 18.85 1.00 2480 2449
## sds(t2xyconditionnonAbias_3) 12.49 3.89 6.93 21.88 1.00 2128 2615
## sds(t2xysurprisal.tr.Z_1) 0.54 0.49 0.02 1.81 1.00 2168 2201
## sds(t2xysurprisal.tr.Z_2) 1.10 1.03 0.03 3.90 1.00 2136 1934
## sds(t2xysurprisal.tr.Z_3) 1.00 0.92 0.04 3.39 1.00 2780 2771
## sds(t2xyParticipant_1) 0.48 0.12 0.25 0.73 1.00 1406 1943
## sds(t2xyStimulus_1) 0.09 0.06 0.00 0.23 1.00 3156 2509
##
## Population-Level Effects:
##
## Estimate Est.Error l-95% CI u-95% CI Rhat Bulk_ESS Tail_ESS
## Intercept -2.34 0.11 -2.56 -2.11 1.00 3901 3387
## trial_number.Z 0.60 0.04 0.52 0.67 1.00 11285 2447
## surprisal.tr.Z -0.14 0.73 -1.57 1.29 1.00 5293 2992
## condition2 0.61 0.15 0.31 0.91 1.00 2572 2865
## t2xy:conditionAbias_1 1.31 0.14 1.02 1.59 1.00 2711 2026
## t2xy:conditionAbias_2 -0.06 0.13 -0.31 0.19 1.00 3471 2795
## t2xy:conditionAbias_3 -0.08 0.20 -0.46 0.31 1.00 4097 3196
## t2xy:conditionnonAbias_1 1.31 0.13 1.05 1.58 1.00 2734 2788
## t2xy:conditionnonAbias_2 0.12 0.11 -0.09 0.35 1.00 2763 2949
## t2xy:conditionnonAbias_3 0.01 0.17 -0.33 0.35 1.00 3322 2891
## t2xy:surprisal.tr.Z_1 -0.17 0.70 -1.56 1.22 1.00 5245 3216
## t2xy:surprisal.tr.Z_2 -0.08 0.05 -0.17 0.01 1.00 8732 2913
## t2xy:surprisal.tr.Z_3 -0.01 0.04 -0.10 0.08 1.00 7982 3276
## t2xy:surprisal.tr.Z_4 -0.04 0.06 -0.15 0.07 1.00 7961 3168
##
## Family Specific Parameters:
## Estimate Est.Error l-95% CI u-95% CI Rhat Bulk_ESS Tail_ESS

```

```
## sigma    10.06    0.03    10.01    10.12 1.00    5096    2281
##
## Samples were drawn using sampling(NUTS). For each parameter, Bulk_ESS
## and Tail_ESS are effective sample size measures, and Rhat is the potential
## scale reduction factor on split chains (at convergence, Rhat = 1).
```

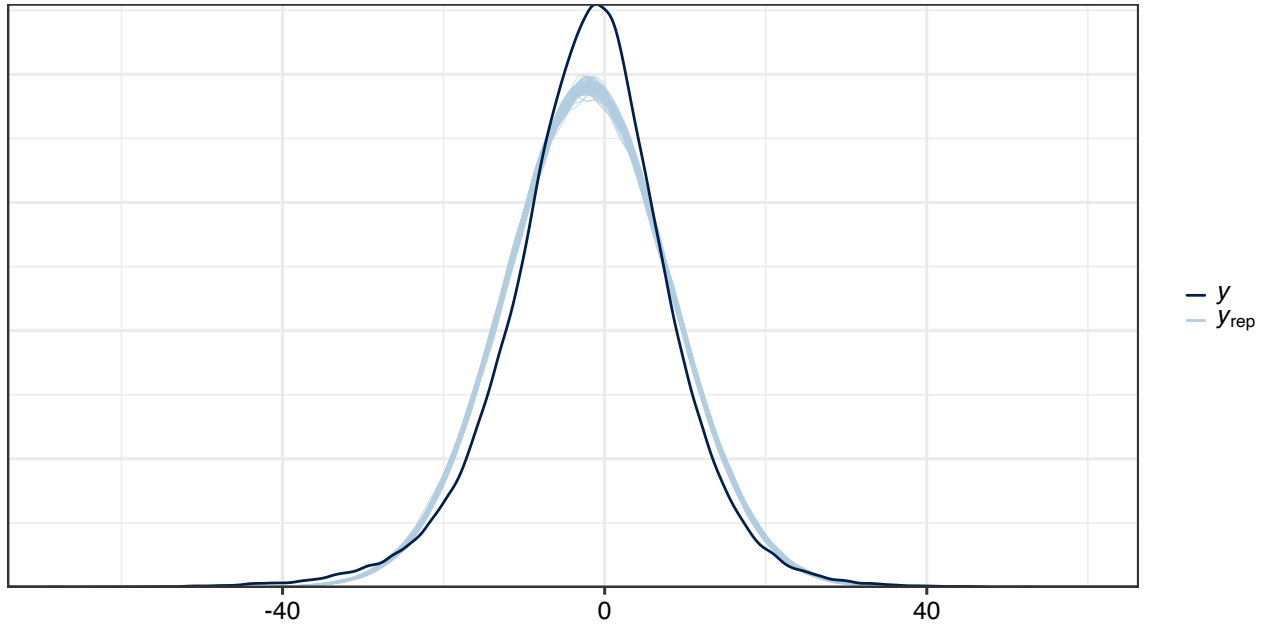

GPT-based surprisal:

```
if (!file.exists('../gams_fitted_models/gam_eu_agent_gpt.RDS')){
  prior.brms <- c(
    prior(normal(0,1), class = b),
    prior(exponential(1), class = sigma)
  )
  model.agent.surprisal.gpt <- brm(mV
    ~ 1
    + trial_number.Z
    + surprisal.gpt.Z
    + Condition
    + t2(x, y, by = Condition, k = 10)
    + t2(x, y, by = surprisal.gpt.Z, k = 10)
    + t2(x, y, Participant, bs = "re")
    + t2(x, y, Stimulus, bs = "re"),
    prior = prior.brms,
    sample_prior = TRUE,
    data = basque.data,
    chains = 4, iter = 2000, cores = 4
  )
  saveRDS(model.agent.surprisal.gpt,
    '../gams_fitted_models/gam_eu_agent_gpt.RDS')
}
model.eu.agent.surp.gpt <-
  readRDS('../gams_fitted_models/gam_eu_agent_gpt.RDS')
summary(model.eu.agent.surp.gpt)
```

```

## Family: gaussian
## Links: mu = identity; sigma = identity
## Formula: mV ~ 1 + trial_number.Z + surprisal.gpt.Z + condition + t2(x, y, by = condition, k = 10) +
## Data: basque.data (Number of observations: 68600)
## Samples: 4 chains, each with iter = 2000; warmup = 1000; thin = 1;
## total post-warmup samples = 4000
##
## Smooth Terms:
## Estimate Est.Error 1-95% CI u-95% CI Rhat Bulk_ESS Tail_ESS
## sds(t2xyconditionAbias_1) 2.04 1.79 0.06 6.73 1.00 1628 2056
## sds(t2xyconditionAbias_2) 12.24 3.70 6.84 21.06 1.00 2889 3254
## sds(t2xyconditionAbias_3) 13.44 3.99 7.70 23.62 1.00 2741 2718
## sds(t2xyconditionnonAbias_1) 3.73 2.46 0.43 9.90 1.01 819 1375
## sds(t2xyconditionnonAbias_2) 10.90 3.31 6.08 18.91 1.00 2737 3344
## sds(t2xyconditionnonAbias_3) 12.70 3.85 7.13 22.15 1.00 2529 2903
## sds(t2xysurprisal.gpt.Z_1) 0.50 0.46 0.02 1.71 1.00 2158 2460
## sds(t2xysurprisal.gpt.Z_2) 1.09 1.03 0.04 3.83 1.00 2200 2464
## sds(t2xysurprisal.gpt.Z_3) 1.70 1.29 0.10 5.11 1.00 1613 1852
## sds(t2xyParticipant_1) 0.48 0.12 0.26 0.73 1.00 1683 1718
## sds(t2xyStimulus_1) 0.09 0.07 0.00 0.24 1.00 3188 2156
##
## Population-Level Effects:
## Estimate Est.Error 1-95% CI u-95% CI Rhat Bulk_ESS Tail_ESS
## Intercept -2.33 0.11 -2.54 -2.10 1.00 4324 3392
## trial_number.Z 0.60 0.04 0.52 0.67 1.00 11071 2875
## surprisal.gpt.Z -0.03 0.73 -1.49 1.39 1.00 5704 2995
## condition2 0.59 0.15 0.30 0.88 1.00 3182 3340
## t2xy:conditionAbias_1 1.34 0.14 1.05 1.61 1.00 3173 2607
## t2xy:conditionAbias_2 -0.06 0.13 -0.31 0.19 1.00 3317 3087
## t2xy:conditionAbias_3 -0.07 0.21 -0.47 0.36 1.00 3659 2855
## t2xy:conditionnonAbias_1 1.30 0.13 1.04 1.57 1.00 2798 2741
## t2xy:conditionnonAbias_2 0.12 0.11 -0.09 0.35 1.00 2754 2623
## t2xy:conditionnonAbias_3 0.01 0.17 -0.30 0.35 1.00 3291 3055
## t2xy:surprisal.gpt.Z_1 -0.01 0.70 -1.39 1.39 1.00 5736 3032
## t2xy:surprisal.gpt.Z_2 -0.11 0.05 -0.20 -0.01 1.00 7969 3025
## t2xy:surprisal.gpt.Z_3 0.01 0.04 -0.07 0.10 1.00 8066 3286
## t2xy:surprisal.gpt.Z_4 0.00 0.06 -0.12 0.12 1.00 7700 3239
##
## Family Specific Parameters:
## Estimate Est.Error 1-95% CI u-95% CI Rhat Bulk_ESS Tail_ESS
## sigma 10.07 0.03 10.02 10.12 1.01 5685 2200
##
## Samples were drawn using sampling(NUTS). For each parameter, Bulk_ESS
## and Tail_ESS are effective sample size measures, and Rhat is the potential
## scale reduction factor on split chains (at convergence, Rhat = 1).

```

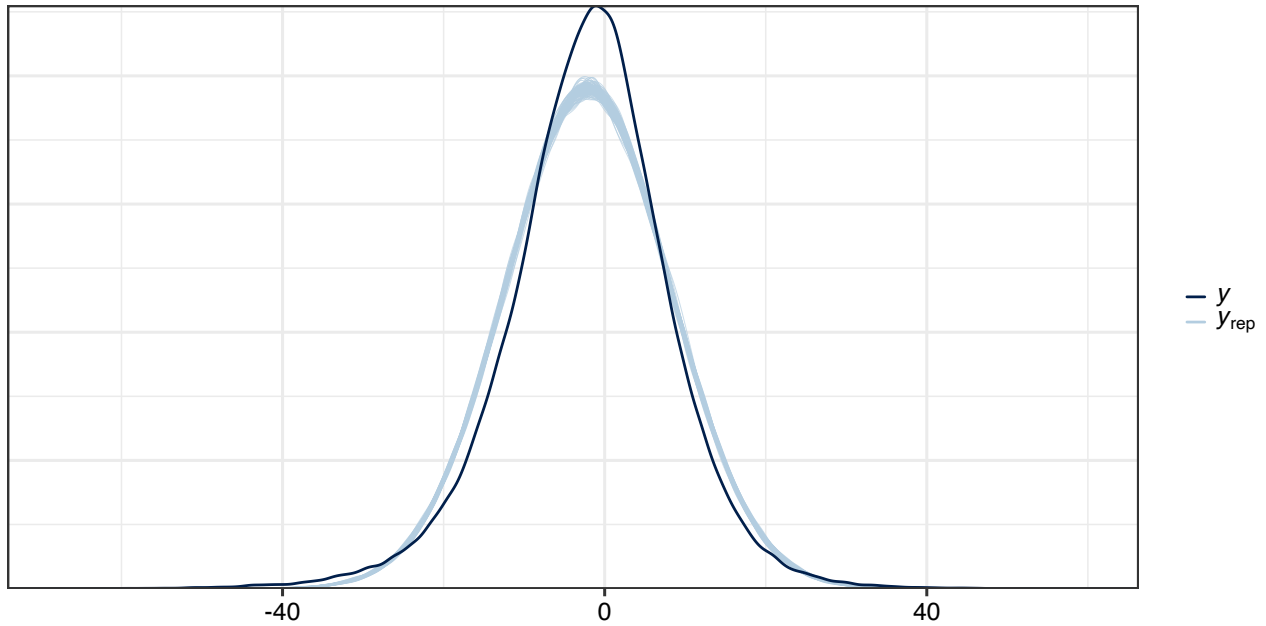

#### S5.1.4 Null model

```

if (!file.exists('../gams_fitted_models/gam_eu_null.RDS')){
  prior.brms <- c(
    prior(normal(0,1), class = b),
    prior(exponential(1), class = sigma)
  )
  model.null <- brm(mV
    ~ 1
    + trial_number.Z
    + t2(x, y, Participant, bs = "re")
    + t2(x, y, Stimulus, bs = "re"),
    prior = prior.brms,
    sample_prior = TRUE,
    data = basque.data,
    chains = 4, iter = 2000, cores = 4
  )
  saveRDS(model.null, '../gams_fitted_models/gam_eu_null.RDS')
}
model.eu.null <- readRDS('../gams_fitted_models/gam_eu_null.RDS')
summary(model.eu.null)

```

```

## Family: gaussian
## Links: mu = identity; sigma = identity
## Formula: mV ~ 1 + trial_number.Z + t2(x, y, Participant, bs = "re") + t2(x, y, Stimulus, bs = "re")
## Data: basque.data (Number of observations: 68600)
## Samples: 4 chains, each with iter = 2000; warmup = 1000; thin = 1;
##           total post-warmup samples = 4000
##
## Smooth Terms:
##           Estimate Est.Error 1-95% CI u-95% CI Rhat Bulk_ESS Tail_ESS

```

```

## sds(t2xyParticipant_1)    0.46    0.12    0.24    0.71 1.00    1480    1890
## sds(t2xyStimulus_1)     0.08    0.06    0.00    0.23 1.00    2716    2240
##
## Population-Level Effects:
##           Estimate Est.Error 1-95% CI u-95% CI Rhat Bulk_ESS Tail_ESS
## Intercept      -2.07    0.04   -2.15   -1.99 1.00    7845    2418
## trial_number.Z    0.59    0.04    0.52    0.67 1.00    6886    2789
##
## Family Specific Parameters:
##           Estimate Est.Error 1-95% CI u-95% CI Rhat Bulk_ESS Tail_ESS
## sigma    10.17     0.03   10.12   10.22 1.00    5701    2591
##
## Samples were drawn using sampling(NUTS). For each parameter, Bulk_ESS
## and Tail_ESS are effective sample size measures, and Rhat is the potential
## scale reduction factor on split chains (at convergence, Rhat = 1).

```

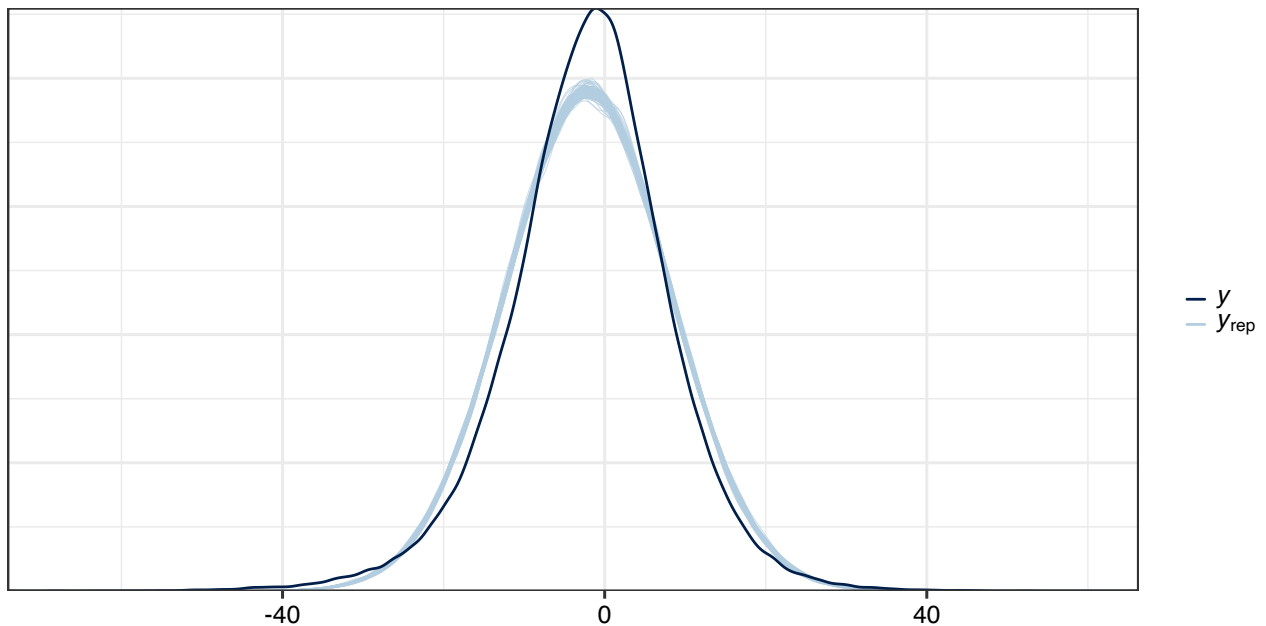

## S5.2 Model comparison with stacking

Here we perform model comparison.

```

if (!file.exists('../temp_data/weights_eu_stacking.RDS')){
  loo.eu.agent <- loo(model.eu.agent)
  loo.eu.lstm <- loo(model.eu.surp.lstm)
  loo.eu.rob <- loo(model.eu.surp.roberta)
  loo.eu.gpt <- loo(model.eu.surp.gpt)
  loo.eu.agent.lstm <- loo(model.eu.agent.surp.lstm)
  loo.eu.agent.rob <- loo(model.eu.agent.surp.roberta)
  loo.eu.agent.gpt <- loo(model.eu.agent.surp.gpt)
  loo.eu.null <- loo(model.eu.null)
  lweights <- loo_model_weights(list(
    "agent bias only"= loo.eu.agent,
    "surprisal lstm" = loo.eu.lstm,

```

```

"surprisal roberta" = loo.eu.rob,
"surprisal gpt" = loo.eu.gpt,
"surprisal lstm and agent bias" = loo.eu.agent.lstm,
"surprisal roberta and agent bias" = loo.eu.agent.rob,
"surprisal gpt and agent bias" = loo.eu.agent.gpt,
"null" = loo.eu.null), method='stacking')

dfweights <- as.data.frame(as.matrix(lweights))
saveRDS(dfweights, '../temp_data/weights_eu_stacking.RDS')
}

```

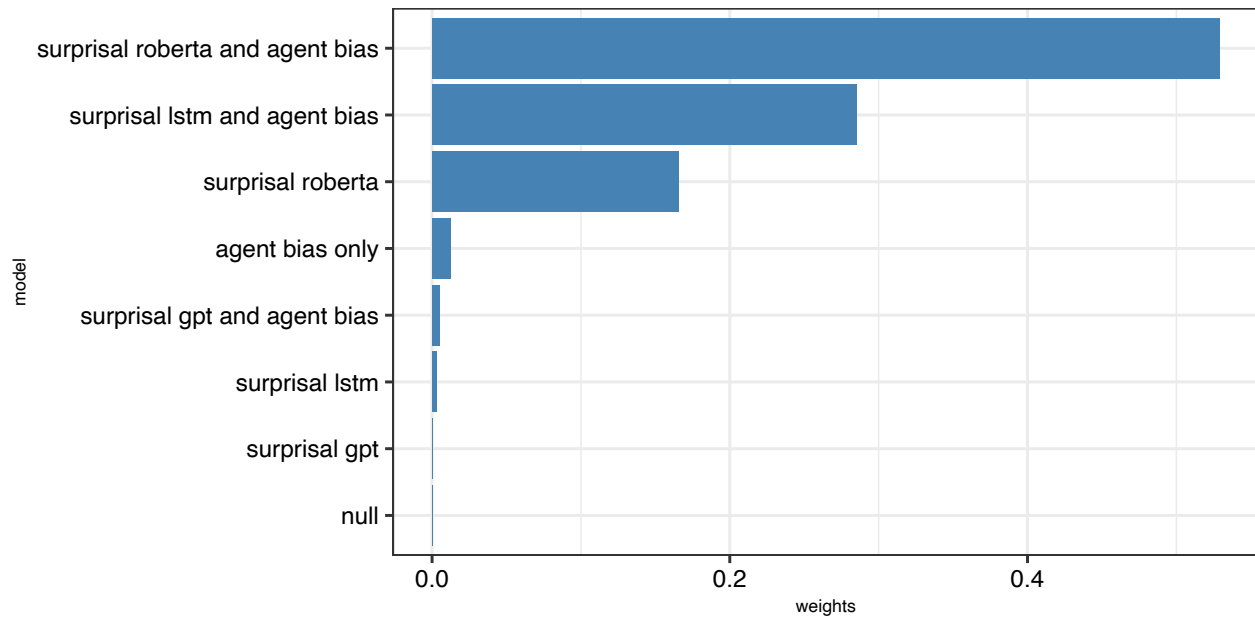

Figure S1: Basque: Weights of models (method = stacking)

### S5.3 Model predictions

In what follows we compute and plot the mean posterior predicted effects across the smoothed scalp surfaces. In each plot, the left-hand side shows the difference between conditions. For surprisal we plot the difference between predictions at +2 and at -2 standard deviations from the mean. Panels on the right-hand side quantify the evidence of the effect in terms of the proportion of the posterior distributions that is below or above 0.

#### S5.3.1 Agent preference alone

```

n_samps <- 4000
newdata.eu.agent <- expand_grid(
  x = seq(min(basque.data$x), max(basque.data$x), length.out = 30),
  y = seq(min(basque.data$y), max(basque.data$y), length.out = 30),
  Participant = "01",
  Stimulus_Cond = c("1_1:Abias", "1_2:nonAbias"),
  trial_number.Z = 0,

```

```

)

newdata.eu.agent <- newdata.eu.agent %>%
  separate(Stimulus_Cond, c('Stimulus', 'condition'), sep=':')

preds.eu.agent <- posterior_epred(model.eu.agent, newdata=newdata.eu.agent,
                                re.form=NA)

preds.eu.agent_long <- as.data.frame(preds.eu.agent) %>%
  mutate(samp = 1:nrow(preds.eu.agent)) %>%
  pivot_longer(-samp)

preds.eu.agent_long$x <- rep(newdata.eu.agent$x, n_samps)
preds.eu.agent_long$y <- rep(newdata.eu.agent$y, n_samps)
preds.eu.agent_long$condition <- rep(newdata.eu.agent$condition, n_samps)

preds.eu.agent_summary <- preds.eu.agent_long %>%
  group_by(x,y,samp) %>%
  mutate(diff_cond = value[condition == 'Abias'] -
         value[condition == 'nonAbias']) %>%
  ungroup() %>%
  group_by(x,y) %>%
  summarise(PP = ifelse(mean(diff_cond) > 0, mean(diff_cond > 0),
                      mean(diff_cond < 0)),
           mean_diff = mean(diff_cond))

plot.agent <- preds.eu.agent_summary %>%
  mutate(sig = ifelse(PP>0.80, 1, 0)) %>%
  ggplot(aes(x=x, y=y, fill=mean_diff, alpha = sig)) +
  geom_tile()+
  scale_fill_gradient2(low = '#0053d3', high = '#b22709', midpoint=0,
                     aesthetics='fill')+
  guides(alpha = "none") +
  theme(panel.grid = element_blank(), panel.border = element_blank(),
        strip.background = element_blank(),strip.text.x = element_text(size=5),
        axis.ticks.x = element_blank(),
        axis.ticks.y=element_blank(),
        axis.text.x=element_blank(),
        axis.text.y = element_blank(),
        plot.background = element_rect(fill = "transparent", colour = NA)) +
  labs(fill=(expression(paste(Delta, paste(mu, "V")))),
       x=element_blank(),
       y=element_blank())

plot.agent.pp <- preds.eu.agent_summary %>%
  ggplot(aes(x=x, y=y, fill=PP)) +
  geom_tile()+
  scale_fill_gradientn(colours = c('white','grey', 'black'),
                     limits = c(0.8, 1), na.value='white' ) +
  labs(fill=(expression(paste('P(|',Delta,mu, V, '| > 0)', ))),
       x=element_blank(),
       y=element_blank()) +
  theme(panel.grid = element_blank(),

```

```

panel.border = element_blank(),
strip.background = element_blank(),
axis.ticks.x = element_blank(),
axis.ticks.y=element_blank(),
axis.text.x=element_blank(),
axis.text.y = element_blank(),
plot.background = element_rect(fill = "transparent", colour = NA))

```

```
wrap_plots(list(plot.agent, plot.agent.pp))
```

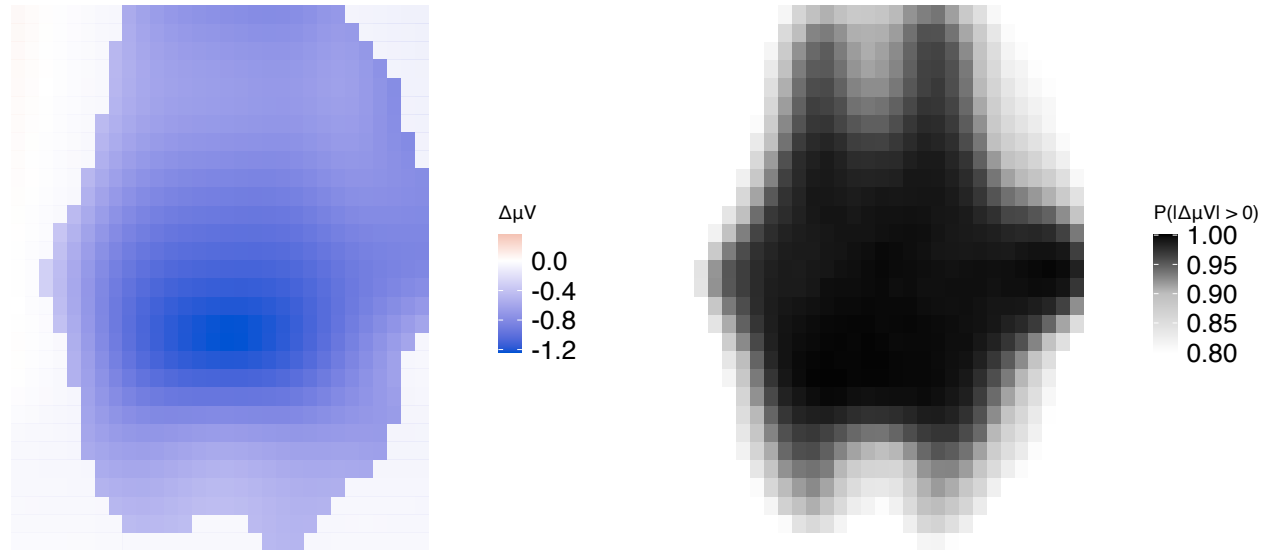

Figure S2: Left: Pair-wise fitted differences of micro-volt for sentences with vs. sentences without the predicted reanalysis from model with agent preference predictor alone. Right: Percentage of posterior probability mass of micro-volt mean difference below or above 0.

### S5.3.2 LSTM-based surprisal alone

```

n_samps <- 4000
newdata.eu.surplstm <- expand_grid(
  x = seq(min(basque.data$x), max(basque.data$x), length.out = 30),
  y = seq(min(basque.data$y), max(basque.data$y), length.out = 30),
  surprisal.lstm.Z = seq(from=-2, to=2, length.out=17),
  Participant = "01",
  Stimulus = "1_1",
  trial_number.Z = 0,
)

preds.eu.surplstm <- posterior_epred(model.eu.surp.lstm,
  newdata=newdata.eu.surplstm, re.form=NA)
preds.eu.surplstm_long <- as.data.frame(preds.eu.surplstm) %>%
  mutate(samp = 1:nrow(preds.eu.surplstm)) %>%
  pivot_longer(-samp)

```



```

preds.eu.surplstm_long$x <- rep(newdata.eu.surplstm$x, n_samps)
preds.eu.surplstm_long$y <- rep(newdata.eu.surplstm$y, n_samps)
preds.eu.surplstm_long$surprisal <-
  rep(newdata.eu.surplstm$surprisal.lstm.Z, n_samps)

summary_eu_surplstm <- preds.eu.surplstm_long %>%
  group_by(x,y,samp) %>%
  mutate(diff_surprisal_low_mean = value[surprisal == 2] -
         value[surprisal == -2]) %>%
  ungroup() %>%
  group_by(x,y) %>%
  summarise(PP = ifelse(mean(diff_surprisal_low_mean) > 0,
                       mean(diff_surprisal_low_mean > 0),
                       mean(diff_surprisal_low_mean < 0)),
            mean_diff = mean(diff_surprisal_low_mean))

plot.lstm <- summary_eu_surplstm %>%
  mutate(sig = ifelse(PP>0.80, 1, 0)) %>%
  ggplot(aes(x=x, y=y, fill=mean_diff, alpha = sig)) +
  geom_tile()+
  scale_fill_gradient2(low = '#0053d3', high = '#b22709', midpoint=0,
                      aesthetics='fill')+
  guides(alpha = "none") +
  theme(panel.grid = element_blank(), panel.border = element_blank(),
        strip.background = element_blank(),strip.text.x = element_text(size=5),
        axis.ticks.x = element_blank(),
        axis.ticks.y=element_blank(),
        axis.text.x=element_blank(),
        axis.text.y = element_blank(),
        plot.background = element_rect(fill = "transparent", colour = NA)) +
  labs(fill=(expression(paste(Delta, paste(mu, "V")))),
       x=element_blank(),
       y=element_blank())

plot.lstm.pp <- summary_eu_surplstm %>%
  ggplot(aes(x=x, y=y, fill=PP)) +
  geom_tile()+
  scale_fill_gradientn(colours = c('white','grey', 'black'),
                      limits = c(0.8, 1), na.value='white' ) +
  labs(fill=(expression(paste('P(|',Delta,mu, V, '| > 0)', ))),
       x=element_blank(),
       y=element_blank()) +
  theme(panel.grid = element_blank(),
        panel.border = element_blank(),
        strip.background = element_blank(),
        axis.ticks.x = element_blank(),
        axis.ticks.y=element_blank(),
        axis.text.x=element_blank(),
        axis.text.y = element_blank(),
        plot.background = element_rect(fill = "transparent", colour = NA))

wrap_plots(list(plot.lstm, plot.lstm.pp))

```

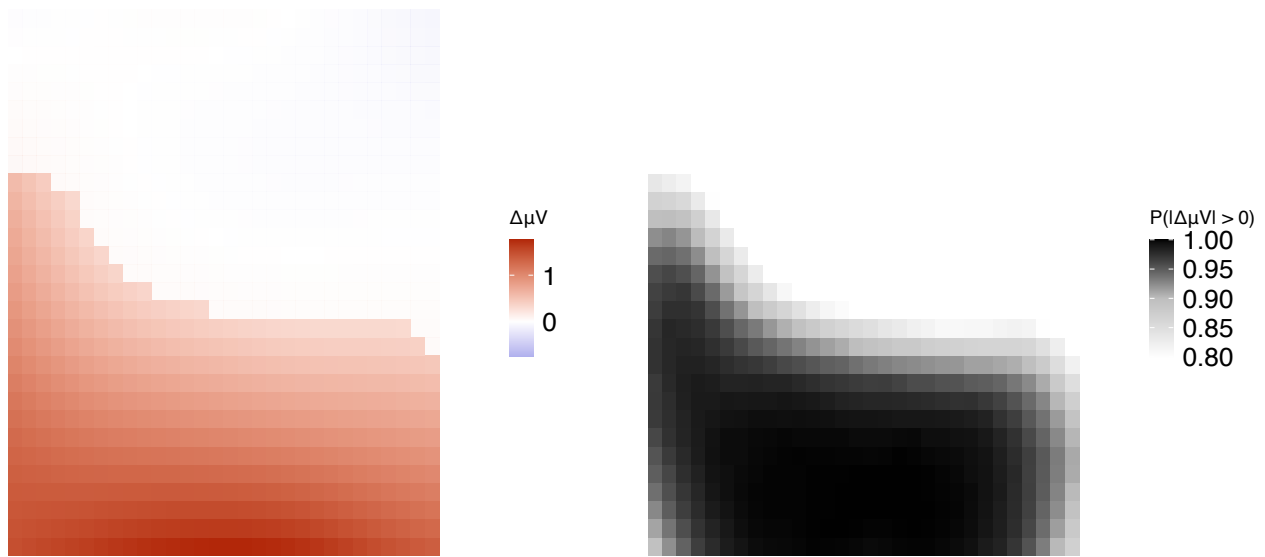

Figure S3: Left: Pair-wise fitted differences of  $\mu V$  for sentences with high vs. sentences with low (+2 vs. -2 std. dev. from the mean) from model with LSTM surprisal as predictor alone. Right: Percentage of posterior probability mass of  $\mu V$  mean difference below or above 0.

### S5.3.3 RoBERTa-based surprisal alone

```
n_samps <- 4000
newdata.eu.surptr <- rename(newdata.eu.surplstm, surprisal.tr.Z =
                           surprisal.lstm.Z)
preds.eu.surptr <- posterior_epred(model.eu.surp.roberta,
                                  newdata=newdata.eu.surptr,
                                  re.form=NA)
preds.eu.surptr_long <- as.data.frame(preds.eu.surptr) %>%
  mutate(samp = 1:nrow(preds.eu.surptr)) %>%
  pivot_longer(-samp)

preds.eu.surptr_long$x <- rep(newdata.eu.surptr$x, n_samps)
preds.eu.surptr_long$y <- rep(newdata.eu.surptr$y, n_samps)
preds.eu.surptr_long$surprisal <- rep(newdata.eu.surptr$surprisal.tr.Z, n_samps)

summary_eu_surptr <- preds.eu.surptr_long %>%
  group_by(x,y,samp) %>%
  mutate(diff_surprisal_low_mean = value[surprisal == 2] -
         value[surprisal == -2]) %>%
  ungroup() %>%
  group_by(x,y) %>%
  summarise(PP = ifelse(mean(diff_surprisal_low_mean) > 0,
                        mean(diff_surprisal_low_mean > 0),
                        mean(diff_surprisal_low_mean < 0)),
            mean_diff = mean(diff_surprisal_low_mean))

plot.tr <- summary_eu_surptr %>%
  mutate(sig = ifelse(PP>0.80, 1, 0)) %>%
  ggplot(aes(x=x, y=y, fill=mean_diff, alpha = sig)) +
```

```

geom_tile()+
scale_fill_gradient2(low = '#0053d3', high = '#b22709', midpoint=0,
                     aesthetics='fill')+
guides(alpha = "none") +
theme(panel.grid = element_blank(), panel.border = element_blank(),
      strip.background = element_blank(),strip.text.x = element_text(size=5),
      axis.ticks.x = element_blank(),
      axis.ticks.y=element_blank(),
      axis.text.x=element_blank(),
      axis.text.y = element_blank(),
      plot.background = element_rect(fill = "transparent", colour = NA)) +
labs(fill=(expression(paste(Delta, paste(mu, "V")))),
     x=element_blank(),
     y=element_blank())

plot.tr.pp <- summary_eu_surptr %>%
ggplot(aes(x=x, y=y, fill=PP)) +
geom_tile()+
scale_fill_gradientn(colours = c('white','grey', 'black'),
                     limits = c(0.8, 1), na.value='white' ) +
labs(fill=(expression(paste('P(|',Delta,mu, V, '| > 0)', ))),
     x=element_blank(),
     y=element_blank()) +
theme(panel.grid = element_blank(),
      panel.border = element_blank(),
      strip.background = element_blank(),
      axis.ticks.x = element_blank(),
      axis.ticks.y=element_blank(),
      axis.text.x=element_blank(),
      axis.text.y = element_blank(),
      plot.background = element_rect(fill = "transparent", colour = NA))

wrap_plots(list(plot.tr, plot.tr.pp))

```

### S5.3.4 GPT-based surprisal alone

```

n_samps <- 4000
newdata.eu.surpgpt <- rename(newdata.eu.surplstm, surprisal.gpt.Z =
                           surprisal.lstm.Z)
preds.eu.surpgpt <- posterior_epred(model.eu.surp.gpt,
                                   newdata=newdata.eu.surpgpt,
                                   re.form=NA)
preds.eu.surpgpt_long <- as.data.frame(preds.eu.surpgpt) %>%
  mutate(samp = 1:nrow(preds.eu.surpgpt)) %>%
  pivot_longer(-samp)

preds.eu.surpgpt_long$x <- rep(newdata.eu.surpgpt$x, n_samps)
preds.eu.surpgpt_long$y <- rep(newdata.eu.surpgpt$y, n_samps)
preds.eu.surpgpt_long$surprisal <- rep(newdata.eu.surpgpt$surprisal.gpt.Z, n_samps)

summary_eu_surpgpt <- preds.eu.surpgpt_long %>%

```

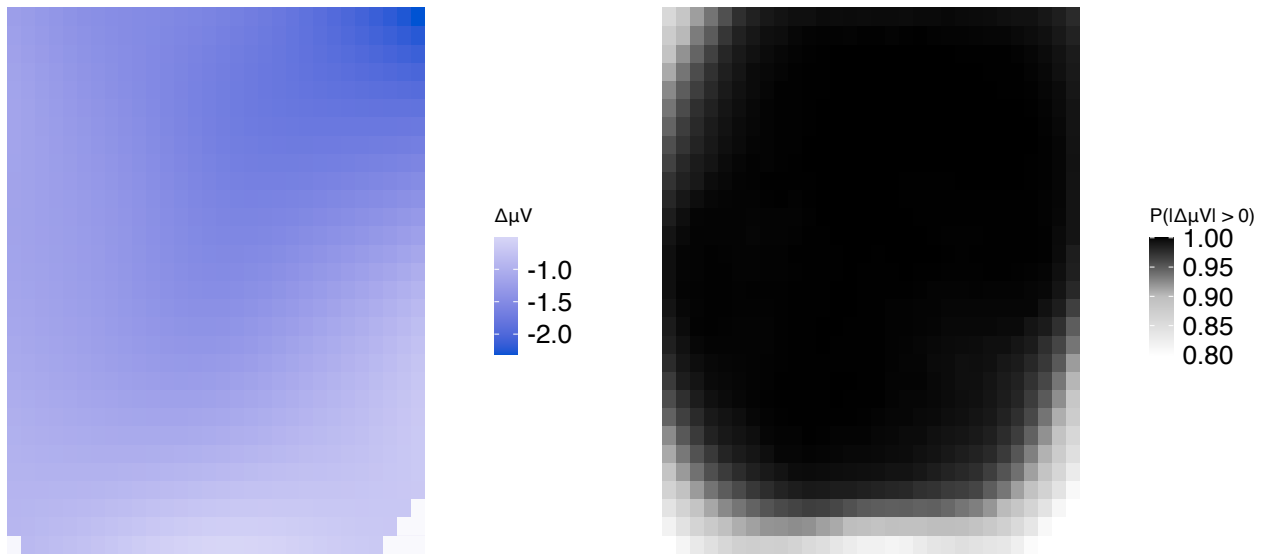

Figure S4: Left: Pair-wise fitted differences of  $\mu V$  for sentences with high vs. sentences with low (+2 vs. -2 std. dev. from the mean) from model with RoBERTa surprisal as predictor alone. Right: Percentage of posterior probability mass of  $\mu V$  mean difference below or above 0.

```

group_by(x,y,samp) %>%
mutate(diff_surprisal_low_mean = value[surprisal == 2] -
       value[surprisal == -2]) %>%
ungroup() %>%
group_by(x,y) %>%
summarise(PP = ifelse(mean(diff_surprisal_low_mean) > 0,
                     mean(diff_surprisal_low_mean > 0),
                     mean(diff_surprisal_low_mean < 0)),
          mean_diff = mean(diff_surprisal_low_mean))

plot.gpt <- summary_eu_surpgpt %>%
mutate(sig = ifelse(PP>0.80, 1, 0)) %>%
ggplot(aes(x=x, y=y, fill=mean_diff, alpha = sig)) +
geom_tile()+
scale_fill_gradient2(low = '#0053d3', high = '#b22709', midpoint=0,
                    aesthetics='fill')+
guides(alpha = "none") +
theme(panel.grid = element_blank(), panel.border = element_blank(),
      strip.background = element_blank(),
      strip.text.x = element_text(size=5),
      axis.ticks.x = element_blank(),
      axis.ticks.y=element_blank(),
      axis.text.x=element_blank(),
      axis.text.y = element_blank(),
      plot.background = element_rect(fill = "transparent", colour = NA)) +
labs(fill=(expression(paste(Delta, paste(mu, "V")))),
     x=element_blank(),
     y=element_blank())

plot.gpt.pp <- summary_eu_surpgpt %>%
ggplot(aes(x=x, y=y, fill=PP)) +

```

```

geom_tile()+
scale_fill_gradientn(colours = c('white','grey', 'black'),
                    limits = c(0.8, 1), na.value='white' ) +
labs(fill=(expression(paste('P(|',Delta,mu, V, '| > 0)', ))),
     x=element_blank(),
     y=element_blank()) +
theme(panel.grid = element_blank(),
      panel.border = element_blank(),
      strip.background = element_blank(),
      axis.ticks.x = element_blank(),
      axis.ticks.y=element_blank(),
      axis.text.x=element_blank(),
      axis.text.y = element_blank(),
      plot.background = element_rect(fill = "transparent", colour = NA))

```

```
wrap_plots(list(plot.gpt, plot.gpt.pp))
```

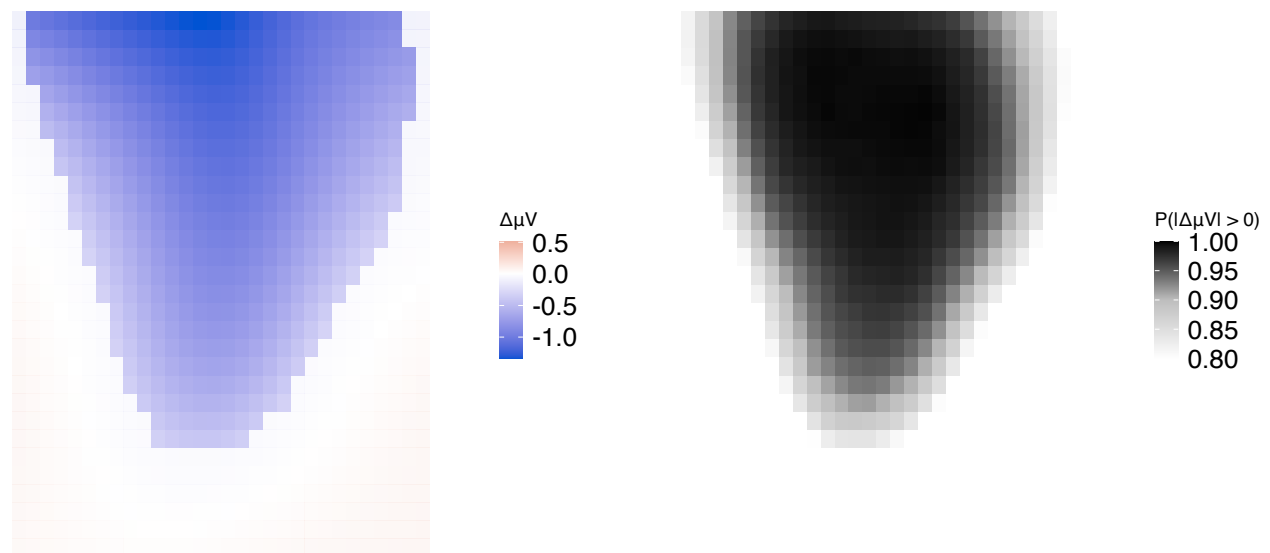

Figure S5: Left: Pair-wise fitted differences of  $\mu V$  for sentences with high vs. sentences with low (+2 vs. -2 std. dev. from the mean) from model with GPT-2 surprisal as predictor alone. Right: Percentage of posterior probability mass of  $\mu V$  mean difference below or above 0.

### S5.3.5 LSTM-based surprisal and Agent Preference

```

n_samps <- 4000
newdata.eu.agent.surplstm <- expand_grid(
  x = seq(min(basque.data$x), max(basque.data$x), length.out = 30),
  y = seq(min(basque.data$y), max(basque.data$y), length.out = 30),
  surprisal.lstm.Z = seq(from=-2, to=2, length.out=17),
  Participant = "01",
  Stimulus_Cond = c("1_1:Abias", "1_2:nonAbias"),
  trial_number.Z = 0,
)

```

```

newdata.eu.agent.surplstm <- separate(newdata.eu.agent.surplstm,
                                     Stimulus_Cond, c('Stimulus', 'condition'),
                                     sep=':')

preds.eu.agent.surplstm <- posterior_epred(model.eu.agent.surplstm,
                                           newdata=newdata.eu.agent.surplstm,
                                           re.form=NA)

preds.eu.agent.surplstm_long <- as.data.frame(preds.eu.agent.surplstm) %>%
  mutate(samp = 1:nrow(preds.eu.agent.surplstm)) %>%
  pivot_longer(-samp)

preds.eu.agent.surplstm_long$x <- rep(newdata.eu.agent.surplstm$x, n_samps)
preds.eu.agent.surplstm_long$y <- rep(newdata.eu.agent.surplstm$y, n_samps)
preds.eu.agent.surplstm_long$surprisal <-
  rep(newdata.eu.agent.surplstm$surprisal.lstm.Z, n_samps)
preds.eu.agent.surplstm_long$condition <-
  rep(newdata.eu.agent.surplstm$condition, n_samps)

summary_eu_agent_surplstm.abias <- preds.eu.agent.surplstm_long %>%
  filter(condition %in% 'Abias') %>%
  group_by(x,y,samp) %>%
  summarise(diff_surprisal_low_mean = value[surprisal == 2] -
            value[surprisal == -2]) %>%
  ungroup() %>%
  group_by(x,y) %>%
  summarise(PP = ifelse(mean(diff_surprisal_low_mean) > 0,
                        mean(diff_surprisal_low_mean > 0),
                        mean(diff_surprisal_low_mean < 0)),
            mean_diff = mean(diff_surprisal_low_mean)) %>%
  mutate(condition = 'Abias')

summary_eu_agent_surplstm.nonabias <- preds.eu.agent.surplstm_long %>%
  filter(condition %in% 'nonAbias') %>%
  group_by(x,y,samp) %>%
  mutate(diff_surprisal_low_mean = value[surprisal == 2] -
            value[surprisal == -2]) %>%
  ungroup() %>%
  group_by(x,y) %>%
  summarise(PP = ifelse(mean(diff_surprisal_low_mean) > 0,
                        mean(diff_surprisal_low_mean > 0),
                        mean(diff_surprisal_low_mean < 0)),
            mean_diff = mean(diff_surprisal_low_mean)) %>%
  mutate(condition = 'nonAbias')

summary_eu_agent_surplstm <- rbind(summary_eu_agent_surplstm.abias,
                                   summary_eu_agent_surplstm.nonabias)

plot.lstm.agent.surp <- summary_eu_agent_surplstm %>%
  mutate(sig = ifelse(PP>0.80, 1, 0)) %>%
  ggplot(aes(x=x, y=y, fill=mean_diff, alpha = sig)) +
  geom_tile()+
  scale_fill_gradient2(low = '#0053d3', high = '#b22709', midpoint=0,

```

```

      aesthetics='fill')+
guides(alpha = "none") +
theme(panel.grid = element_blank(), panel.border = element_blank(),
      strip.background = element_blank(),strip.text.x = element_text(size=5),
      axis.ticks.x = element_blank(),
      axis.ticks.y=element_blank(),
      axis.text.x=element_blank(),
      axis.text.y = element_blank(),
      plot.background = element_rect(fill = "transparent", colour = NA)) +
labs(fill=(expression(paste(Delta, paste(mu, "V")))),
      x=element_blank(),
      y=element_blank())

plot.lstm.agent.surp.pp <- summary_eu_agent_surplstm %>%
  ggplot(aes(x=x, y=y, fill=PP)) +
  geom_tile()+
  scale_fill_gradientn(colours = c('white','grey', 'black'),
                      limits = c(0.8, 1), na.value='white' ) +
  labs(fill=(expression(paste('P(|',Delta,mu, V, '| > 0)', ))),
      x=element_blank(),
      y=element_blank()) +
  theme(panel.grid = element_blank(),
        panel.border = element_blank(),
        strip.background = element_blank(),
        axis.ticks.x = element_blank(),
        axis.ticks.y=element_blank(),
        axis.text.x=element_blank(),
        axis.text.y = element_blank(),
        plot.background = element_rect(fill = "transparent", colour = NA))

summary_eu_agent_surplstm.conds <- preds.eu.agent_surplstm_long %>%
  filter(surprisal == 0) %>%
  group_by(x,y,samp) %>%
  mutate(diff_condition = value[condition == 'Abias'] -
         value[condition == 'nonAbias']) %>%
  ungroup() %>%
  group_by(x,y) %>%
  summarise(PP = ifelse(mean(diff_condition) > 0,
                      mean(diff_condition > 0),
                      mean(diff_condition < 0)),
            mean_diff = mean(diff_condition))

plot.lstm.agent.cond <- summary_eu_agent_surplstm.conds %>%
  mutate(sig = ifelse(PP>0.80, 1, 0)) %>%
  ggplot(aes(x=x, y=y, fill=mean_diff, alpha = sig)) +
  geom_tile()+
  scale_fill_gradient2(low = '#0053d3', high = '#b22709', midpoint=0,
                     aesthetics='fill')+
  guides(alpha = "none") +
  theme(panel.grid = element_blank(), panel.border = element_blank(),
        strip.background = element_blank(),strip.text.x = element_text(size=5),
        axis.ticks.x = element_blank(),
        axis.ticks.y=element_blank(),

```

```

axis.text.x=element_blank(),
axis.text.y = element_blank(),
plot.background = element_rect(fill = "transparent", colour = NA)) +
labs(fill=(expression(paste(Delta, paste(mu, "V")))),
x=element_blank(),
y=element_blank())

plot.lstm.agent.cond.pp <- summary_eu_agent_surplstm.conds %>%
ggplot(aes(x=x, y=y, fill=PP)) +
geom_tile()+
scale_fill_gradientn(colours = c('white','grey', 'black'),limits = c(0.8, 1),
na.value='white' ) +
guides(alpha = "none") +
theme(panel.grid = element_blank(), panel.border = element_blank(),
strip.background = element_blank(),strip.text.x = element_text(size=5),
axis.ticks.x = element_blank(),
axis.ticks.y=element_blank(),
axis.text.x=element_blank(),
axis.text.y = element_blank(),
plot.background = element_rect(fill = "transparent", colour = NA)) +
labs(fill=(expression(paste(Delta, paste(mu, "V")))),
x=element_blank(),
y=element_blank())

wrap_plots(list(plot.lstm.agent.cond, plot.lstm.agent.surp,
plot.lstm.agent.cond.pp, plot.lstm.agent.surp.pp))

```

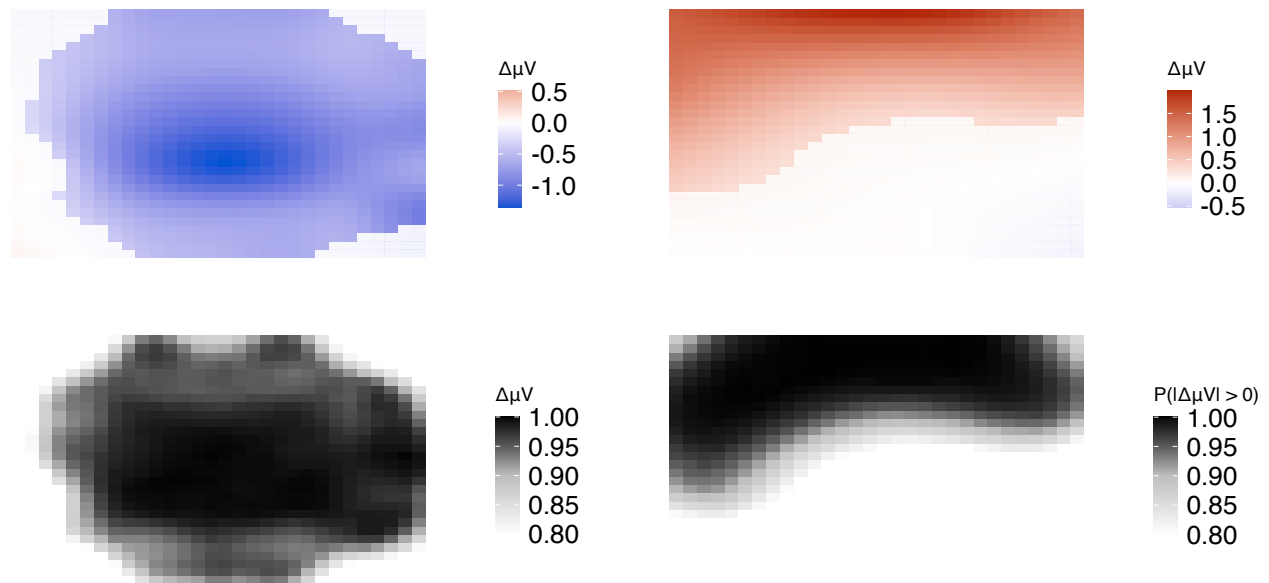

Figure S6: Left: Pair-wise fitted differences of  $\mu V$  for sentences with vs. sentences without the predicted reanalysis from model with LSTM surprisal as well as agent preference predictor. Right: Percentage of posterior probability mass of  $\mu V$  mean difference below or above 0.



### S5.3.6 RoBERTa-based surprisal and Agent Preference

```
n_samps <- 4000
newdata.eu.agent.surptr <- newdata.eu.agent.surplstm %>%
  rename(surprisal.tr.Z = surprisal.lstm.Z)

preds.eu.agent.surptr <- posterior_epred(model.eu.agent.surp.roberta,
                                       newdata=newdata.eu.agent.surptr,
                                       re.form=NA)

preds.eu.agent.surptr_long <- as.data.frame(preds.eu.agent.surptr) %>%
  mutate(samp = 1:nrow(preds.eu.agent.surptr)) %>%
  pivot_longer(-samp)

preds.eu.agent.surptr_long$x <- rep(newdata.eu.agent.surptr$x, n_samps)
preds.eu.agent.surptr_long$y <- rep(newdata.eu.agent.surptr$y, n_samps)
preds.eu.agent.surptr_long$surprisal <-
  rep(newdata.eu.agent.surptr$surprisal.tr.Z, n_samps)
preds.eu.agent.surptr_long$condition <-
  rep(newdata.eu.agent.surptr$condition, n_samps)

summary_eu_agent_surptr <- preds.eu.agent.surptr_long %>%
  filter(condition %in% 'Abias') %>%
  group_by(x,y,samp) %>%
  mutate(diff_surprisal_low_mean = value[surprisal == 2] -
         value[surprisal == -2]) %>%
  ungroup() %>%
  group_by(x,y) %>%
  summarise(PP = ifelse(mean(diff_surprisal_low_mean) > 0,
                       mean(diff_surprisal_low_mean > 0),
                       mean(diff_surprisal_low_mean < 0)),
           mean_diff = mean(diff_surprisal_low_mean)) %>%
  mutate('condition' = 'Abias')

plot.tr.agent.surp <- summary_eu_agent_surptr %>%
  mutate(sig = ifelse(PP>0.80, 1, 0)) %>%
  ggplot(aes(x=x, y=y, fill=mean_diff)) +
  geom_tile(aes(alpha = sig))+
  scale_fill_gradient2(low = '#0053d3', high = '#b22709',
                      midpoint=0, aesthetics='fill')+
  guides(alpha = "none") +
  theme(panel.grid = element_blank(), panel.border = element_blank(),
        strip.background = element_blank(),strip.text.x = element_text(size=5),
        axis.ticks.x = element_blank(),
        axis.ticks.y=element_blank(),
        axis.text.x=element_blank(),
        axis.text.y = element_blank(),
        plot.background = element_rect(fill = "transparent", colour = NA)) +
  labs(fill=(expression(paste(Delta, paste(mu, "V")))),
       x=element_blank(),
       y=element_blank())

plot.tr.agent.surp.pp <- summary_eu_agent_surptr %>%
```

```

ggplot(aes(x=x, y=y, fill=PP)) +
  geom_tile()+
  scale_fill_gradientn(colours = c('white','grey', 'black'),
                      limits = c(0.8, 1), na.value='white' ) +
  labs(fill=(expression(paste('P(|',Delta,mu, V, '| > 0)', ))),
       x=element_blank(),
       y=element_blank()) +
  theme(panel.grid = element_blank(),
        panel.border = element_blank(),
        strip.background = element_blank(),
        axis.ticks.x = element_blank(),
        axis.ticks.y=element_blank(),
        axis.text.x=element_blank(),
        axis.text.y = element_blank(),
        plot.background = element_rect(fill = "transparent", colour = NA))

summary_eu_agent_surptr.condition <- preds.eu.agent_surptr_long %>%
  filter(surprisal == 0) %>%
  group_by(x,y,samp) %>%
  mutate(diff_condition = value[condition == 'Abias'] -
         value[condition == 'nonAbias']) %>%
  ungroup() %>%
  group_by(x,y) %>%
  summarise(PP = ifelse(mean(diff_condition) > 0,
                      mean(diff_condition > 0),
                      mean(diff_condition < 0)),
           mean_diff = mean(diff_condition))

plot.tr.agent.cond <- summary_eu_agent_surptr.condition %>%
  mutate(sig = ifelse(PP>0.80, 1, 0)) %>%
  ggplot(aes(x=x, y=y, fill=mean_diff, alpha = sig)) +
  geom_tile()+
  scale_fill_gradient2(low = '#0053d3', high = '#b22709', midpoint=0,
                     aesthetics='fill')+
  guides(alpha = "none") +
  theme(panel.grid = element_blank(), panel.border = element_blank(),
        strip.background = element_blank(),strip.text.x = element_text(size=5),
        axis.ticks.x = element_blank(),
        axis.ticks.y=element_blank(),
        axis.text.x=element_blank(),
        axis.text.y = element_blank(),
        plot.background = element_rect(fill = "transparent", colour = NA)) +
  labs(fill=(expression(paste(Delta, paste(mu, "V")))),
       x=element_blank(),
       y=element_blank())

plot.tr.agent.cond.pp <- summary_eu_agent_surptr.condition %>%
  ggplot(aes(x=x, y=y, fill=PP)) +
  geom_tile() +
  scale_fill_gradientn(colours = c('white','grey', 'black'),
                      limits = c(0.8, 1), na.value='white' ) +
  labs(fill=(expression(paste('P(|',Delta,mu, V, '| > 0)', ))),
       x=element_blank(),

```

```

y=element_blank() +
theme(panel.grid = element_blank(),
      panel.border = element_blank(),
      strip.background = element_blank(),
      axis.ticks.x = element_blank(),
      axis.ticks.y=element_blank(),
      axis.text.x=element_blank(),
      axis.text.y = element_blank(),
      plot.background = element_rect(fill = "transparent", colour = NA))

```

```

wrap_plots(list(plot.tr.agent.cond, plot.tr.agent.surp,
               plot.tr.agent.cond.pp, plot.tr.agent.surp.pp))

```

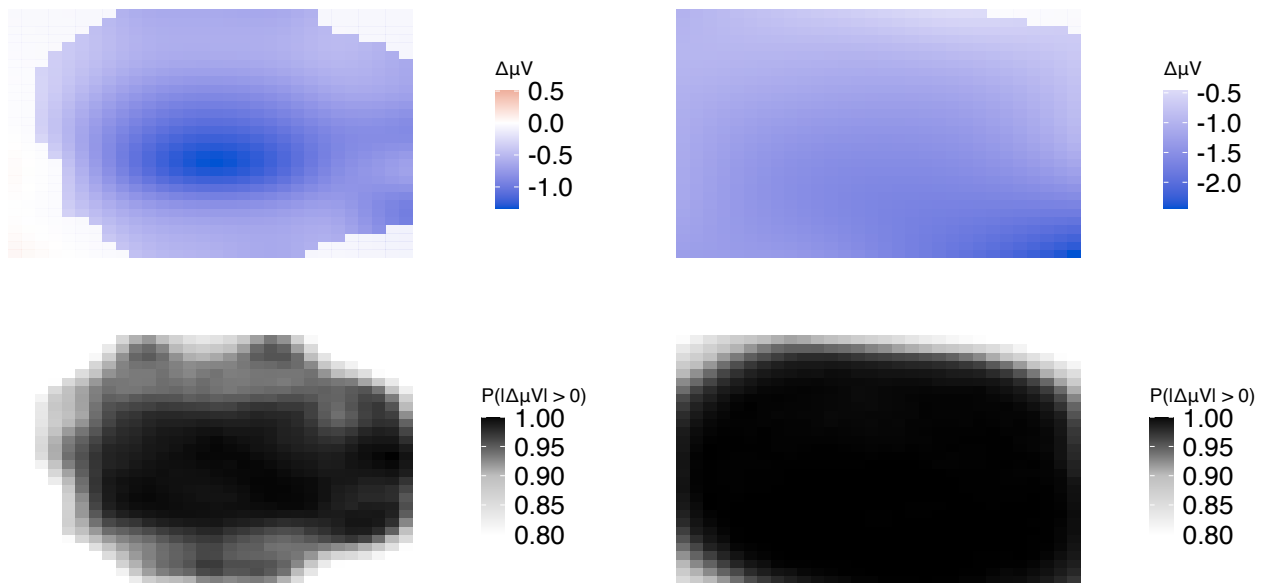

Figure S7: Left: Pair-wise fitted differences of  $\mu V$  for sentences with vs. sentences without the predicted reanalysis from model with RoBERTa surprisal as well as agent preference predictor. Right: Percentage of posterior probability mass of  $\mu V$  mean difference below or above 0.

### S5.3.7 GPT-based surprisal and Agent Preference

```

n_samps <- 4000
newdata.eu.agent.surpgpt <- newdata.eu.agent.surplstm %>%
  rename(surprisal.gpt.Z = surprisal.lstm.Z)
preds.eu.agent.surpgpt <- posterior_epred(model.eu.agent.surp.gpt,
                                         newdata=newdata.eu.agent.surpgpt,
                                         re.form=NA)

preds.eu.agent.surpgpt_long <- as.data.frame(preds.eu.agent.surpgpt) %>%
  mutate(samp = 1:nrow(preds.eu.agent.surpgpt)) %>%
  pivot_longer(-samp)

preds.eu.agent.surpgpt_long$x <- rep(newdata.eu.agent.surpgpt$x, n_samps)

```

```

preds.eu.agent.surpgpt_long$y <- rep(newdata.eu.agent.surpgpt$y, n_samps)
preds.eu.agent.surpgpt_long$surprisal <-
  rep(newdata.eu.agent.surpgpt$surprisal.gpt.Z, n_samps)
preds.eu.agent.surpgpt_long$condition <-
  rep(newdata.eu.agent.surpgpt$condition, n_samps)

summary_eu_agent_surpgpt <- preds.eu.agent.surpgpt_long %>%
  filter(condition %in% 'Abias') %>%
  group_by(x,y,samp) %>%
  mutate(diff_surprisal_low_mean = value[surprisal == 2] -
         value[surprisal == -2]) %>%
  ungroup() %>%
  group_by(x,y) %>%
  summarise(PP = ifelse(mean(diff_surprisal_low_mean) > 0,
                       mean(diff_surprisal_low_mean > 0),
                       mean(diff_surprisal_low_mean < 0)),
            mean_diff = mean(diff_surprisal_low_mean)) %>%
  mutate('condition' = 'Abias')

plot.gpt.agent.surp <- summary_eu_agent_surpgpt %>%
  mutate(sig = ifelse(PP>0.80, 1, 0)) %>%
  ggplot(aes(x=x, y=y, fill=mean_diff)) +
  geom_tile(aes(alpha = sig))+
  scale_fill_gradient2(low = '#0053d3', high = '#b22709', midpoint=0,
                      aesthetics='fill')+
  guides(alpha = "none") +
  theme(panel.grid = element_blank(), panel.border = element_blank(),
        strip.background = element_blank(),strip.text.x = element_text(size=5),
        axis.ticks.x = element_blank(),
        axis.ticks.y=element_blank(),
        axis.text.x=element_blank(),
        axis.text.y = element_blank(),
        plot.background = element_rect(fill = "transparent", colour = NA)) +
  labs(fill=(expression(paste(Delta, paste(mu, "V")))),
       x=element_blank(),
       y=element_blank())

plot.gpt.agent.surp.pp <- summary_eu_agent_surpgpt %>%
  ggplot(aes(x=x, y=y, fill=PP)) +
  geom_tile()+
  scale_fill_gradientn(colours = c('white','grey', 'black'),
                      limits = c(0.8, 1), na.value='white' ) +
  labs(fill=(expression(paste('P(|',Delta,mu, V, '| > 0)', ))),
       x=element_blank(),
       y=element_blank()) +
  theme(panel.grid = element_blank(),
        panel.border = element_blank(),
        strip.background = element_blank(),
        axis.ticks.x = element_blank(),
        axis.ticks.y=element_blank(),
        axis.text.x=element_blank(),
        axis.text.y = element_blank(),
        plot.background = element_rect(fill = "transparent", colour = NA))

```

```

summary_eu_agent_surpgpt.condition <- preds.eu.agent.surpgpt_long %>%
  filter(surprisal == 0) %>%
  group_by(x,y,samp) %>%
  mutate(diff_condition = value[condition == 'Abias'] -
         value[condition == 'nonAbias']) %>%
  ungroup() %>%
  group_by(x,y) %>%
  summarise(PP = ifelse(mean(diff_condition) > 0,
                      mean(diff_condition > 0),
                      mean(diff_condition < 0)),
           mean_diff = mean(diff_condition))

plot.gpt.agent.cond <- summary_eu_agent_surpgpt.condition %>%
  mutate(sig = ifelse(PP>0.80, 1, 0)) %>%
  ggplot(aes(x=x, y=y, fill=mean_diff, alpha = sig)) +
  geom_tile()+
  scale_fill_gradient2(low = '#0053d3', high = '#b22709', midpoint=0,
                      aesthetics='fill')+
  guides(alpha = "none") +
  theme(panel.grid = element_blank(), panel.border = element_blank(),
        strip.background = element_blank(),strip.text.x = element_text(size=5),
        axis.ticks.x = element_blank(),
        axis.ticks.y=element_blank(),
        axis.text.x=element_blank(),
        axis.text.y = element_blank(),
        plot.background = element_rect(fill = "transparent", colour = NA)) +
  labs(fill=(expression(paste(Delta, paste(mu, "V")))),
       x=element_blank(),
       y=element_blank())

plot.gpt.agent.cond.pp <- summary_eu_agent_surpgpt.condition %>%
  ggplot(aes(x=x, y=y, fill=PP)) +
  geom_tile() +
  scale_fill_gradientn(colours = c('white','grey', 'black'),
                      limits = c(0.8, 1), na.value='white') +
  labs(fill=(expression(paste('P(|',Delta,mu, V, '| > 0)', ))),
       x=element_blank(),
       y=element_blank()) +
  theme(panel.grid = element_blank(),
        panel.border = element_blank(),
        strip.background = element_blank(),
        axis.ticks.x = element_blank(),
        axis.ticks.y=element_blank(),
        axis.text.x=element_blank(),
        axis.text.y = element_blank(),
        plot.background = element_rect(fill = "transparent", colour = NA))

wrap_plots(list(plot.gpt.agent.cond, plot.gpt.agent.surp,
               plot.gpt.agent.cond.pp, plot.gpt.agent.surp.pp))

```

### S5.3.8 Strongest effect summary

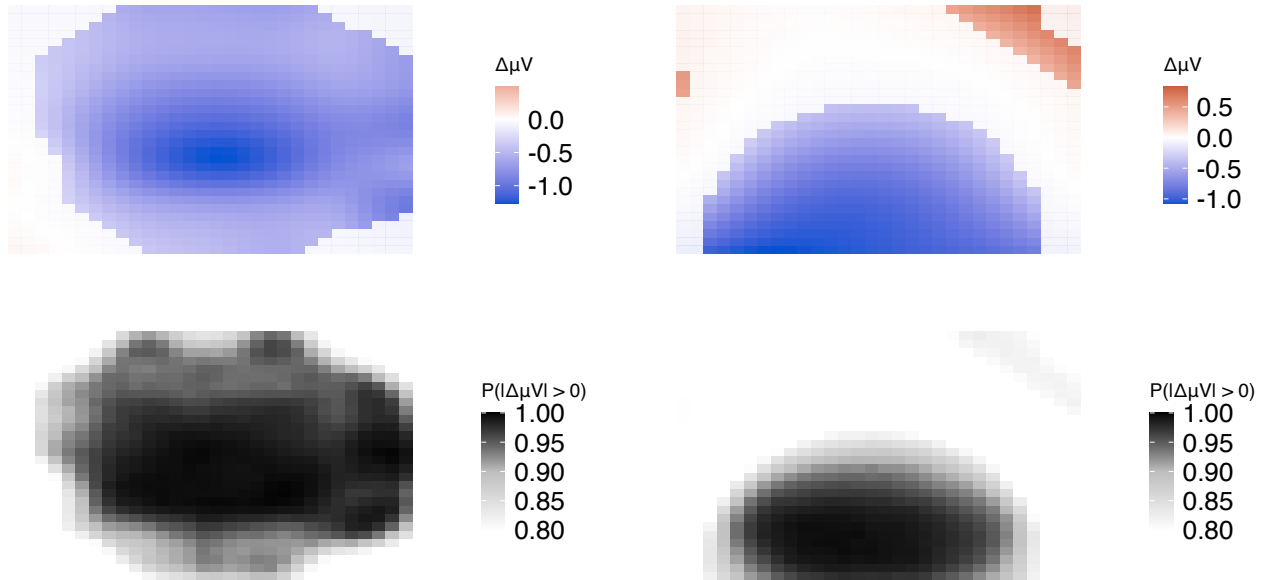

Figure S8: Left: Pair-wise fitted differences of  $\mu V$  for sentences with vs. sentences without the predicted reanalysis from model with GPT-2 surprisal as well as agent preference predictor. Right: Percentage of posterior probability mass of  $\mu V$  mean difference below or above 0.

Table S1: Basque: This table contains the lowest mean delta microVolt (i.e. strongest effect size across the scalp, blue in the plots above) and the maximum proportion of the posterior distribution that is lower than 0 for the highest-ranked model, agent preference + bert surprisal.

| predictor                  | $\min(\text{mean}(\Delta\mu V))$ | $\max(P\Delta\mu V < 0)$ |
|----------------------------|----------------------------------|--------------------------|
| surprisal RoBERTa          | -2.43                            | 1                        |
| agent preference condition | -1.33                            | 1                        |

## S6 References

## 6 Residual Slopes in ERP models



# S6: Residual Slopes in ERP models\*

Eva Huber      Sebastian Sauppe      Arrate Isasi-Isasmendi  
Ina Bornkessel-Schlesewsky      Paola Merlo      Balthasar Bickel

August 29, 2023

## S1 Rationale

Because the GAM models didn't converge with random slopes for participants and items we visualize here the residual errors of participants and items by conditions. There is no apparent trend that would suggest that the residuals correlate in a systematic way with the conditions of interest, suggesting that the lack of random slopes does not inflate the effects of the conditions.

Note that part of the variation by participant and item is captured by the smooth surfaces (see `t2(x, y, Participant, bs = "re")` and `t2(x, y, Stimulus, bs = "re")` in the models fitted in the files `German_analysis2.{R,pdf}`, `Hindi_analysis2.{R,pdf}` and `Basque_analysis2.{R,pdf}` and S3-S5 respectively.).

### S1.1 German

```
data.de <- readRDS('../results/german_mv_surprisal_second.RDS')

data.de$obs <- as.character(1:nrow(data.de))

model.de.agent.surplstm <-
  readRDS('../gams_fitted_models/gam_de_agent_lstm.RDS')

ppc_de_samp <- posterior_predict(model.de.agent.surplstm)
ppc_de_samp <- ppc_de_samp[1:100,]

colnames(ppc_de_samp) <- 1:nrow(data.de)

pp_df_de <- ppc_de_samp %>%
  as.data.frame() %>%
  mutate(sample = 1:n()) %>%
  pivot_longer(-sample, values_to = "prediction", names_to = "obs") %>%
  left_join(data.de) %>%
  mutate(residual = mV - prediction) %>%
  separate(sent_id, c('sent_id', 'condition_id'), sep=':')

pp_df_de <- pp_df_de %>%
```

---

\*This document was `rmarkdown::render`'ed from an R script 'main\_scripts/residuals\_slopes.R' available at <https://osf.io/hbj67>

```
mutate(surprisal_binary = ifelse(surprisal.lstm.Z > 0, 'high', 'low'))
```

```
pp_df_de$surprisal <- as.factor(paste(pp_df_de$surprisal_binary))
```

```
pp_df_de$sent_id <- as.factor(pp_df_de$sent_id)
```

```
pp_df_de <- pp_df_de %>%
```

```
  unite(trial_id, c('trial_number', 'Subject'), sep="_", remove=F)
```

```
pp_df_de %>% ggplot(aes(x=condition, y = residual)) +
  stat_slab(colour = 'black', size = 0.5, fill = NA) +
  facet_wrap(~Participant) +
  geom_hline(aes(yintercept = 0), linetype = "dashed")
```

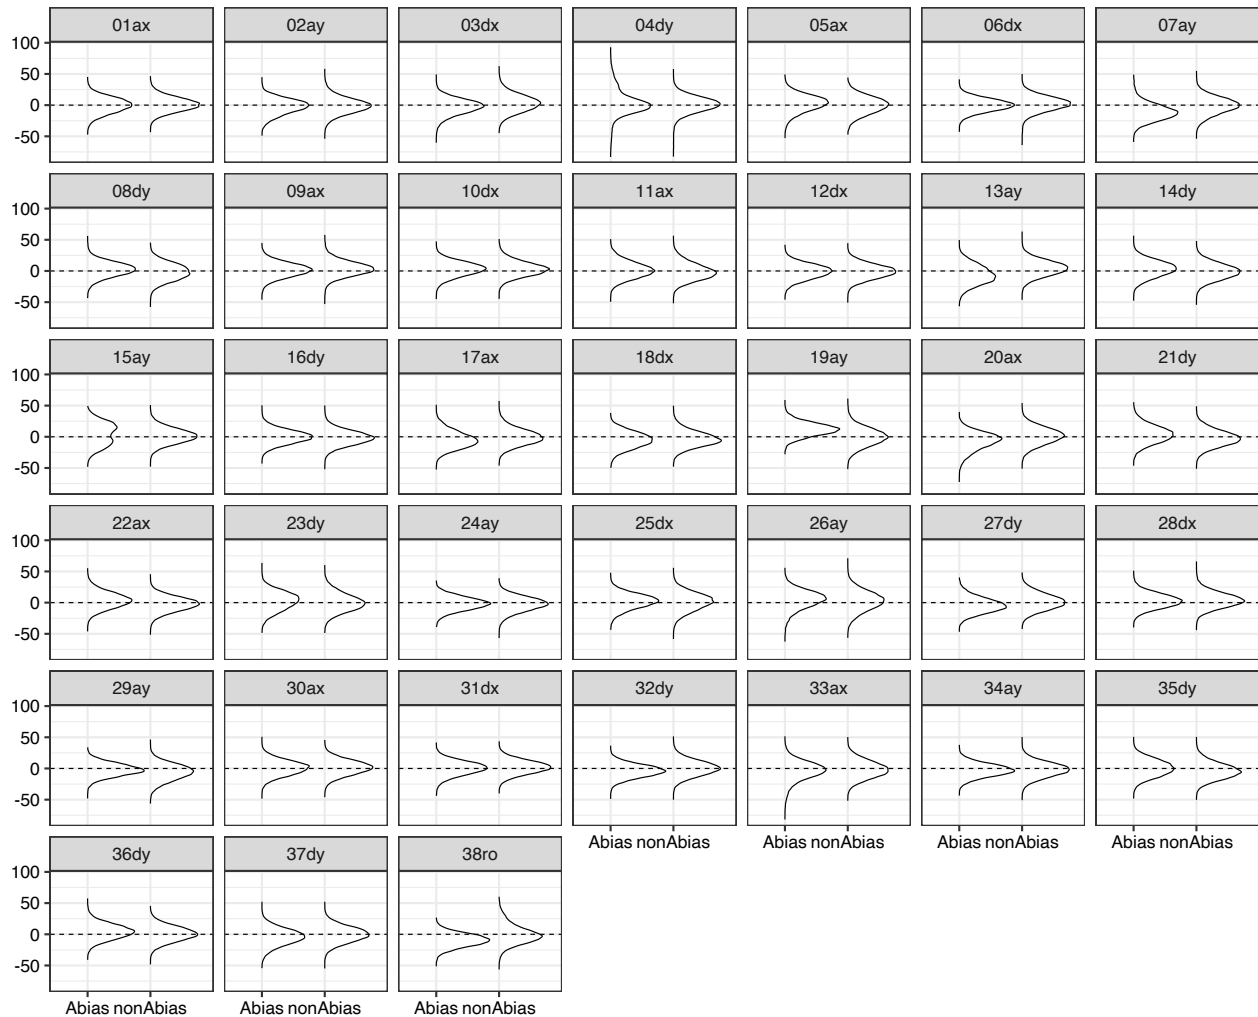

Figure S1: German: Residuals for each participant by condition

```
pp_df_de %>% ggplot(aes(x=surprisal, y = residual)) +
  stat_slab(colour = 'black', size = 0.5, fill = NA) +
  facet_wrap(~Participant) +
  geom_hline(aes(yintercept = 0), linetype = "dashed")
```

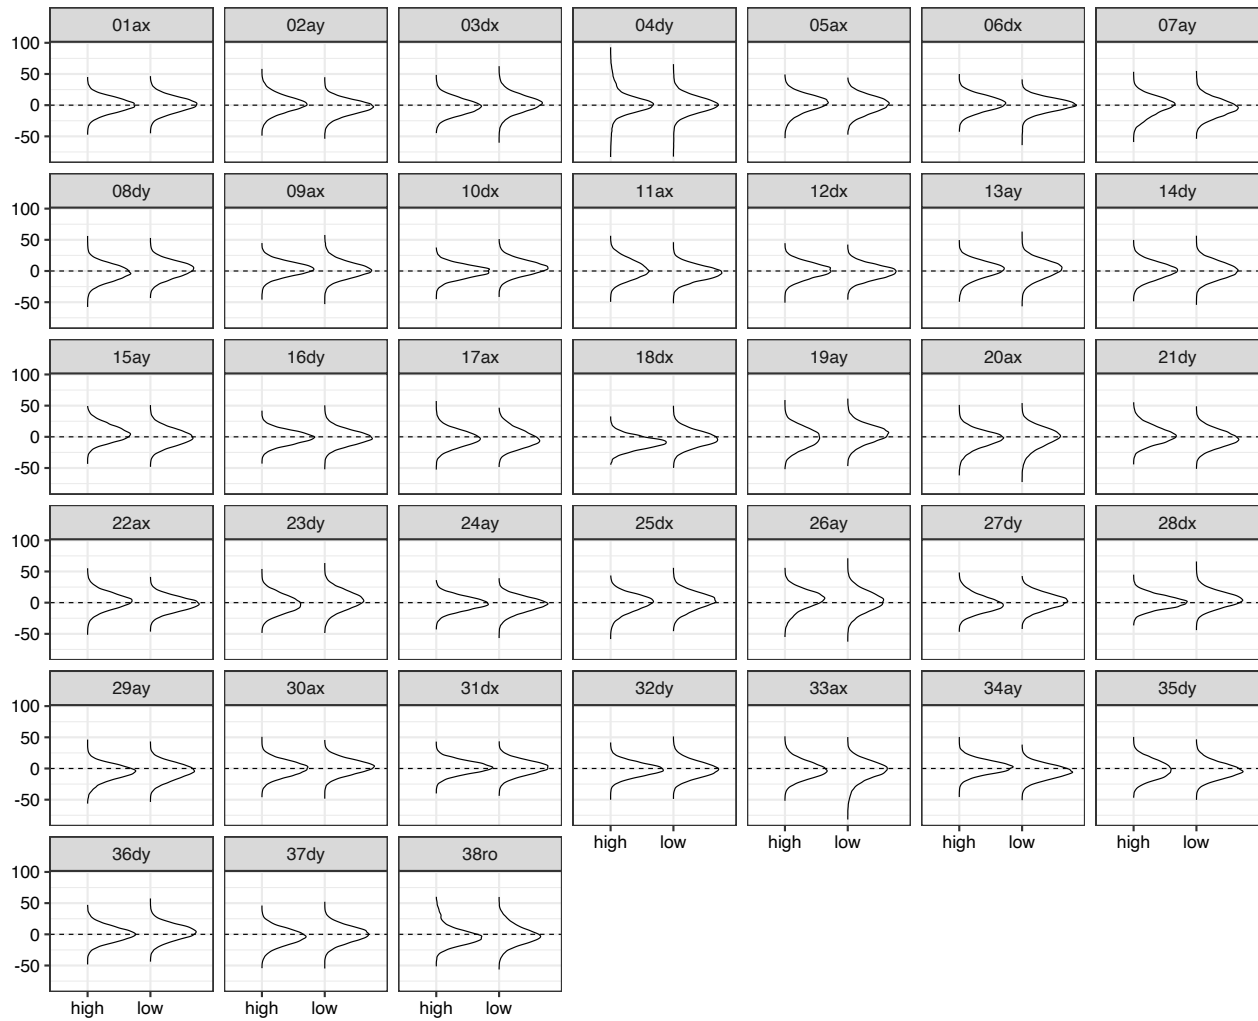

Figure S2: German: Residuals for each participant by surprisal

```
pp_df_de %>% ggplot(aes(x = condition, y = residual)) +
  stat_slab(colour = 'black', size = 0.5, fill = NA) +
  geom_hline(aes(yintercept = 0), linetype = "dashed") +
  facet_wrap(~sent_id)
```

```
pp_df_de %>% ggplot(aes(x = surprisal, y = residual)) +
  stat_slab(colour = 'black', size = 0.5, fill = NA) +
  geom_hline(aes(yintercept = 0), linetype = "dashed") +
  facet_wrap(~sent_id)
```

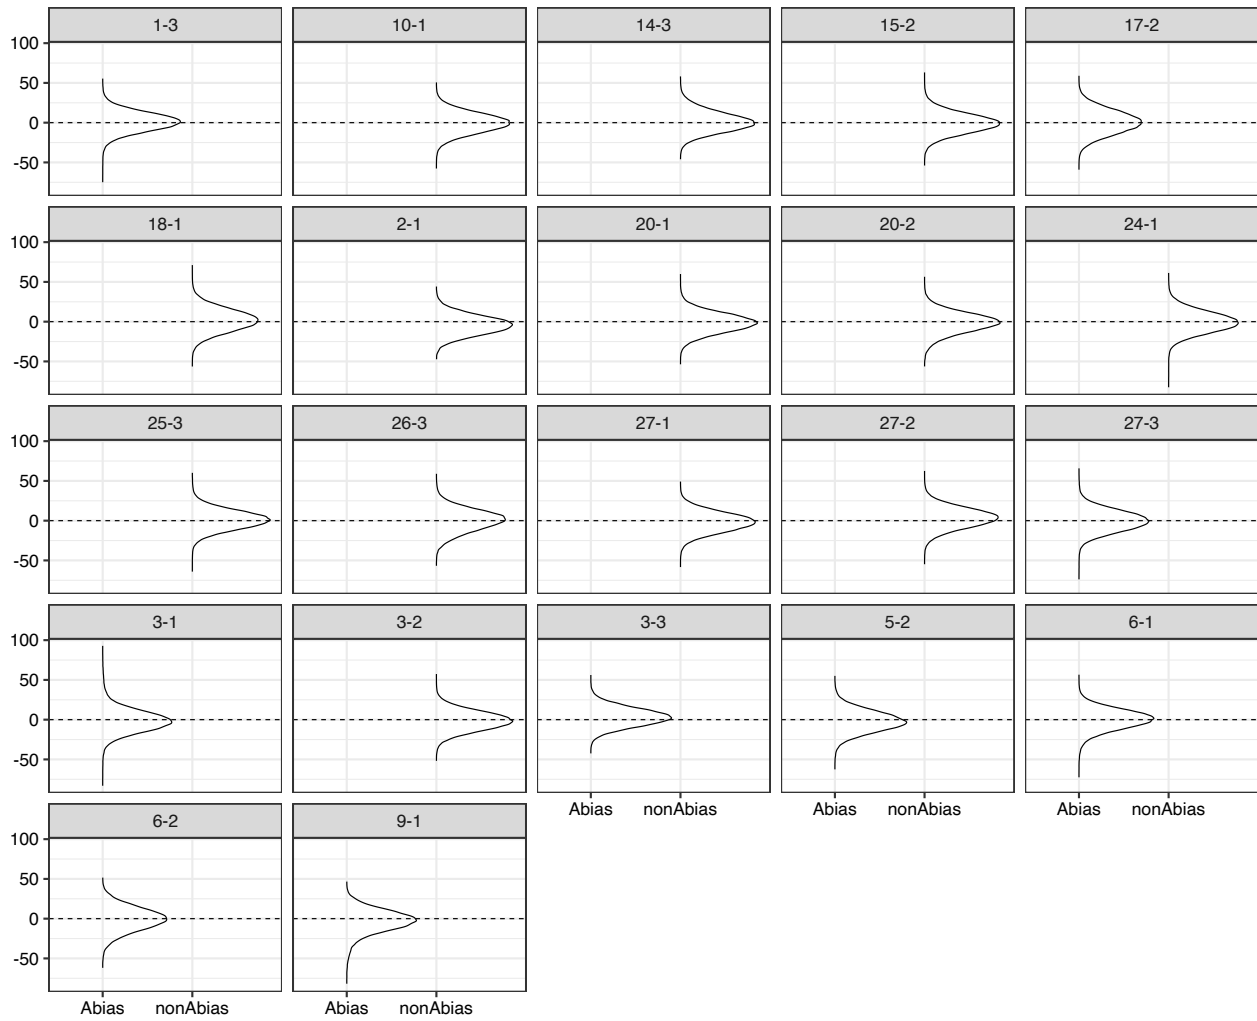

Figure S3: German: Residuals for each stimulus item by condition

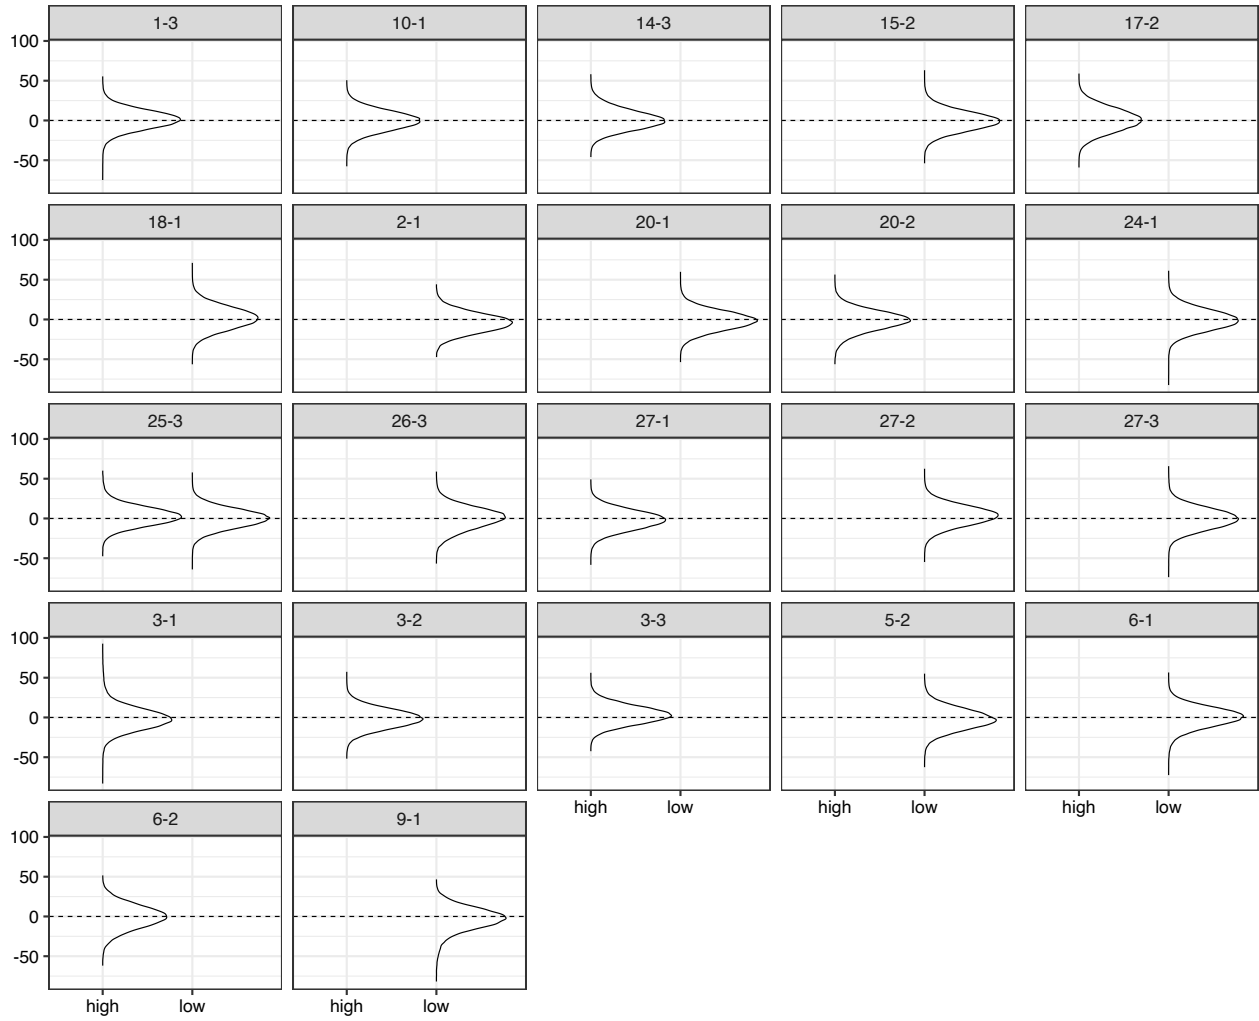

Figure S4: German: Residuals for each stimulus by surprisal

## S1.2 Hindi

```
data.hi <- readRDS('../results/hindi_mv_surprisal_0506.RDS')

model.hi.agent.surpbert <-
  readRDS('../gams_fitted_models/gam_hi_agent_bert.RDS')

data.hi$obs <- as.character(1:nrow(data.hi))

ppc_hi_samp <- posterior_predict(model.hi.agent.surpbert, ndraws = 100)
ppc_hi_samp <- ppc_hi_samp[1:100,]
colnames(ppc_hi_samp) <- 1:nrow(data.hi)

pp_df_hi <- ppc_hi_samp %>%
  as.data.frame() %>%
  mutate(sample = 1:n()) %>%
  pivot_longer(-sample, values_to = "prediction", names_to = "obs") %>%
  left_join(data.hi) %>%
  mutate(residual = mV - prediction)

pp_df_hi <- pp_df_hi %>%
  mutate(surprisal_binary = ifelse(surprisal.tr.Z > 0, 'high', 'low'))

pp_df_hi$surprisal <- as.factor(paste(pp_df_hi$surprisal_binary))

pp_df_hi <- pp_df_hi %>%
  unite(trial_id, c('trial_number', 'Subject'), sep="_", remove=F)
```

```
pp_df_hi %>% ggplot(aes(x=condition, y = residual)) +
  stat_slab(colour = 'black', size = 0.5, fill = NA) +
  facet_wrap(~Participant) +
  geom_hline(aes(yintercept = 0), linetype = "dashed")
```

```
pp_df_hi %>% ggplot(aes(x=surprisal, y = residual)) +
  stat_slab(colour = 'black', size = 0.5, fill = NA) +
  facet_wrap(~Participant) +
  geom_hline(aes(yintercept = 0), linetype = "dashed")
```

```
pp_df_hi %>% ggplot(aes(x = condition , y = residual)) +
  stat_slab(colour = 'black', size = 0.5, fill = NA) +
  geom_hline(aes(yintercept = 0), linetype = "dashed") +
  facet_wrap(~sent_id)
```

```
pp_df_hi %>% ggplot(aes(x = surprisal, y = residual)) +
  stat_slab(colour = 'black', size = 0.5, fill = NA) +
  geom_hline(aes(yintercept = 0), linetype = "dashed") +
  facet_wrap(~sent_id)
```

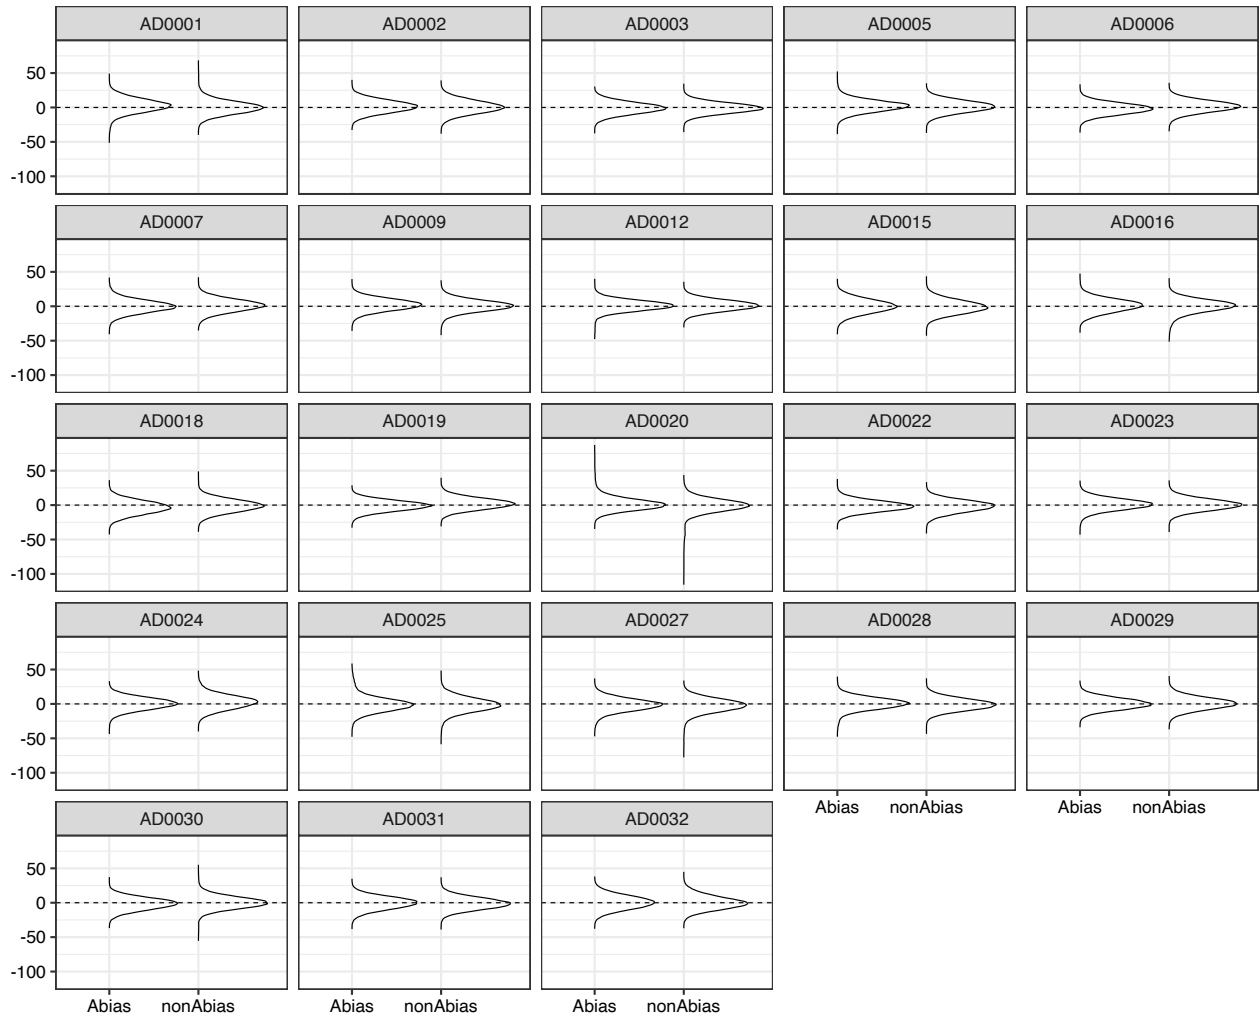

Figure S5: Hindi: Residuals for each participant by condition

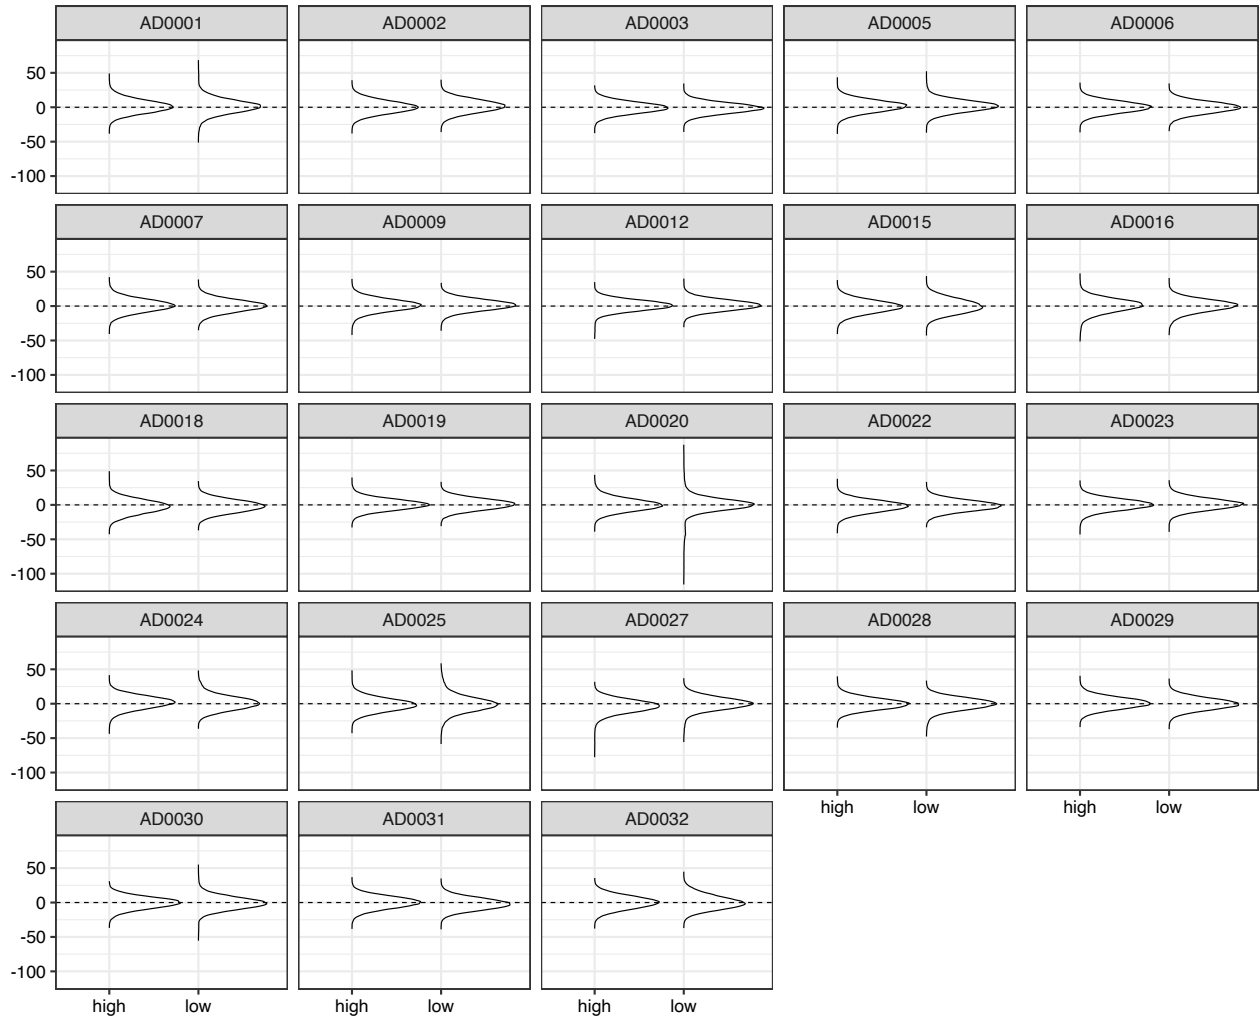

Figure S6: Hindi: Residuals for each participant by surprisal



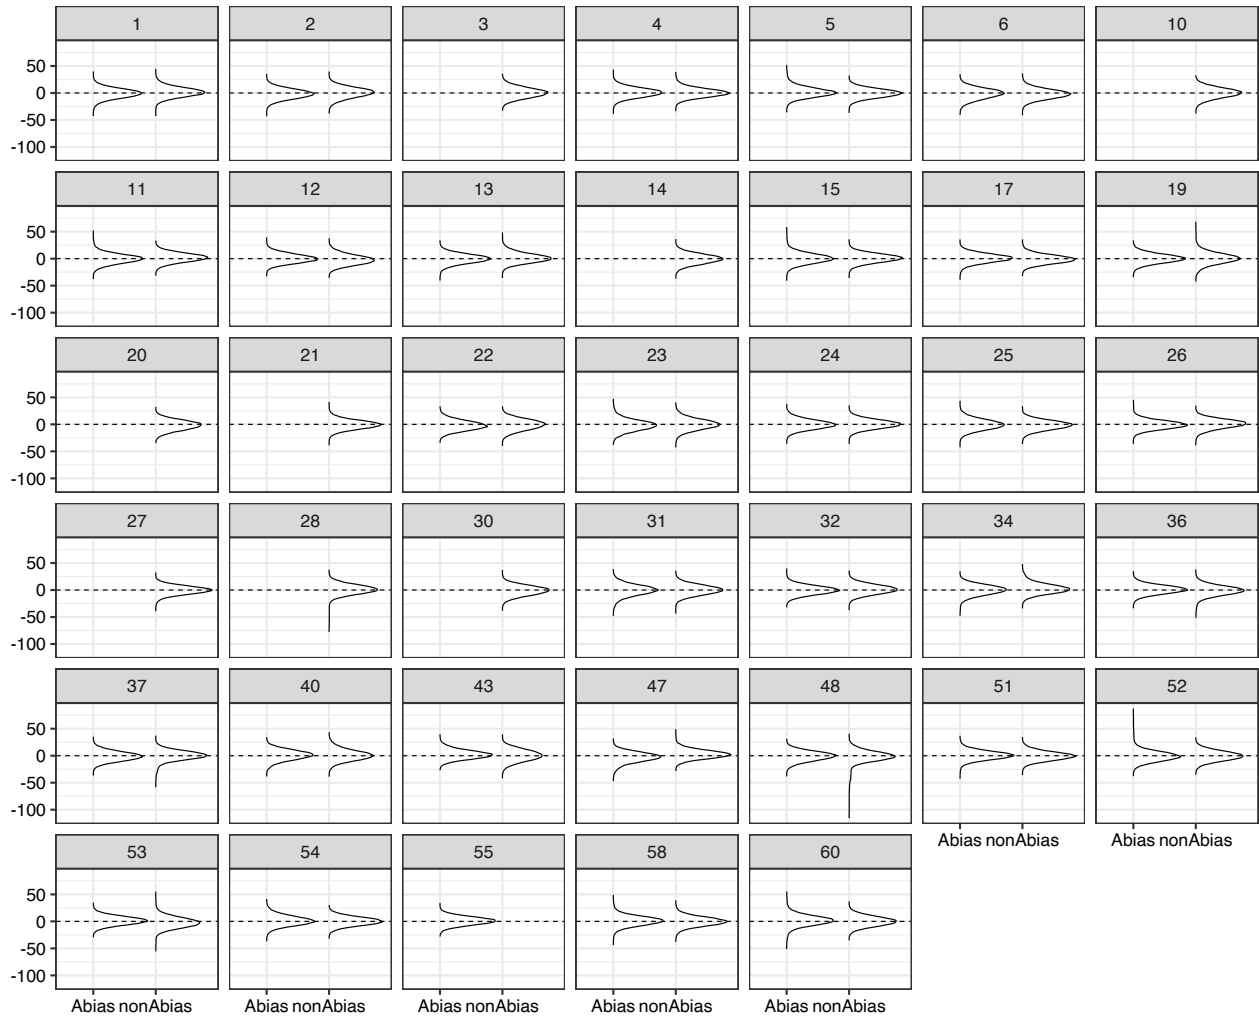

Figure S7: Hindi: Residuals for each stimulus item by condition

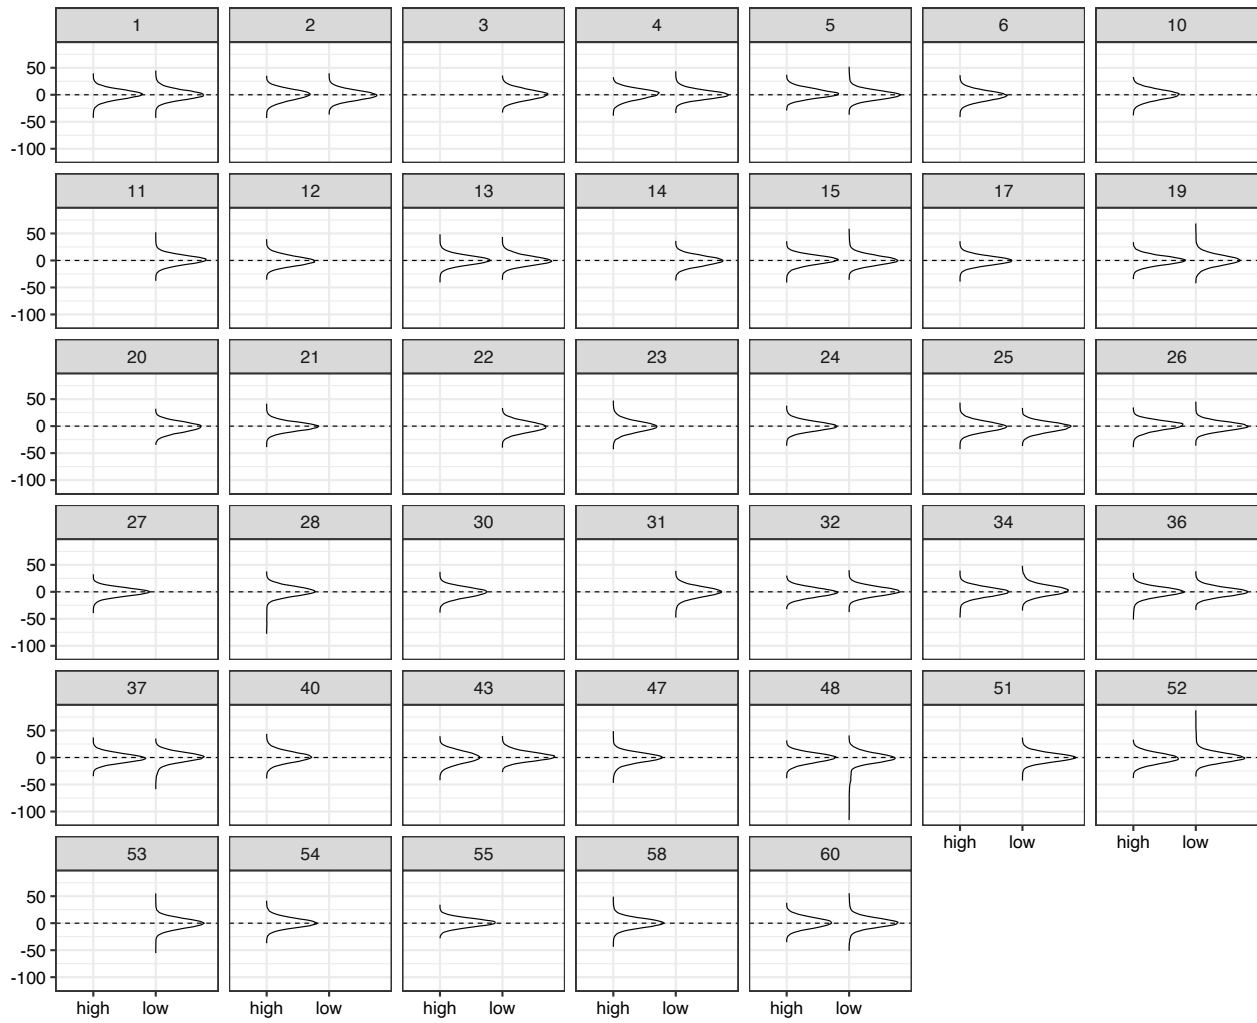

Figure S8: Hindi: Residuals for each stimulus item by surprisal

## S1.3 Basque

```
data.eu <- readRDS('../results/basque_mv_surprisal_new.RDS')

model.eu.agent.surproberta <-
  readRDS('../gams_fitted_models/gam_eu_agent_roberta.RDS')

data.eu$obs <- as.character(1:nrow(data.eu))

ppc_eu_samp <- posterior_predict(model.eu.agent.surproberta, ndraws = 100)
ppc_eu_samp <- ppc_eu_samp[1:100,]
colnames(ppc_eu_samp) <- 1:nrow(data.eu)

pp_df_eu <- ppc_eu_samp %>%
  as.data.frame() %>%
  mutate(sample = 1:n()) %>%
  pivot_longer(-sample, values_to = "prediction", names_to = "obs") %>%
  left_join(data.eu) %>%
  mutate(residual = mV - prediction) %>%
  separate(sent_id, c('sent_id', 'condition_id'), sep='_')

pp_df_eu$sent_id <- as.factor(paste(pp_df_eu$sent_id))

pp_df_eu <- pp_df_eu %>%
  mutate(surprisal_binary = ifelse(surprisal.tr.Z > 0, 'high', 'low'))

pp_df_eu$surprisal <- as.factor(paste(pp_df_eu$surprisal_binary))

pp_df_eu <- pp_df_eu %>%
  unite(trial_id, c('trial_number', 'Subject'), sep="_", remove=F)
```

```
pp_df_eu %>% ggplot(aes(x=condition, y = residual)) +
  stat_slab(colour = 'black', size = 0.5, fill = NA) +
  facet_wrap(~Participant) +
  geom_hline(aes(yintercept = 0), linetype = "dashed")
```

```
pp_df_eu %>% ggplot(aes(x=surprisal, y = residual)) +
  stat_slab(colour = 'black', size = 0.5, fill = NA) +
  facet_wrap(~Participant) +
  geom_hline(aes(yintercept = 0), linetype = "dashed")
```

```
pp_df_eu <- pp_df_eu %>% separate(sent_id, c('sent_id', 'cond_id'), sep='_')
```

```
pp_df_eu %>% ggplot(aes(x = condition, y = residual)) +
  stat_slab(colour = 'black', size = 0.5, fill = NA) +
  geom_hline(aes(yintercept = 0), linetype = "dashed") +
  facet_wrap(~sent_id)+
  theme(axis.text.x = element_text(size = 9))
```

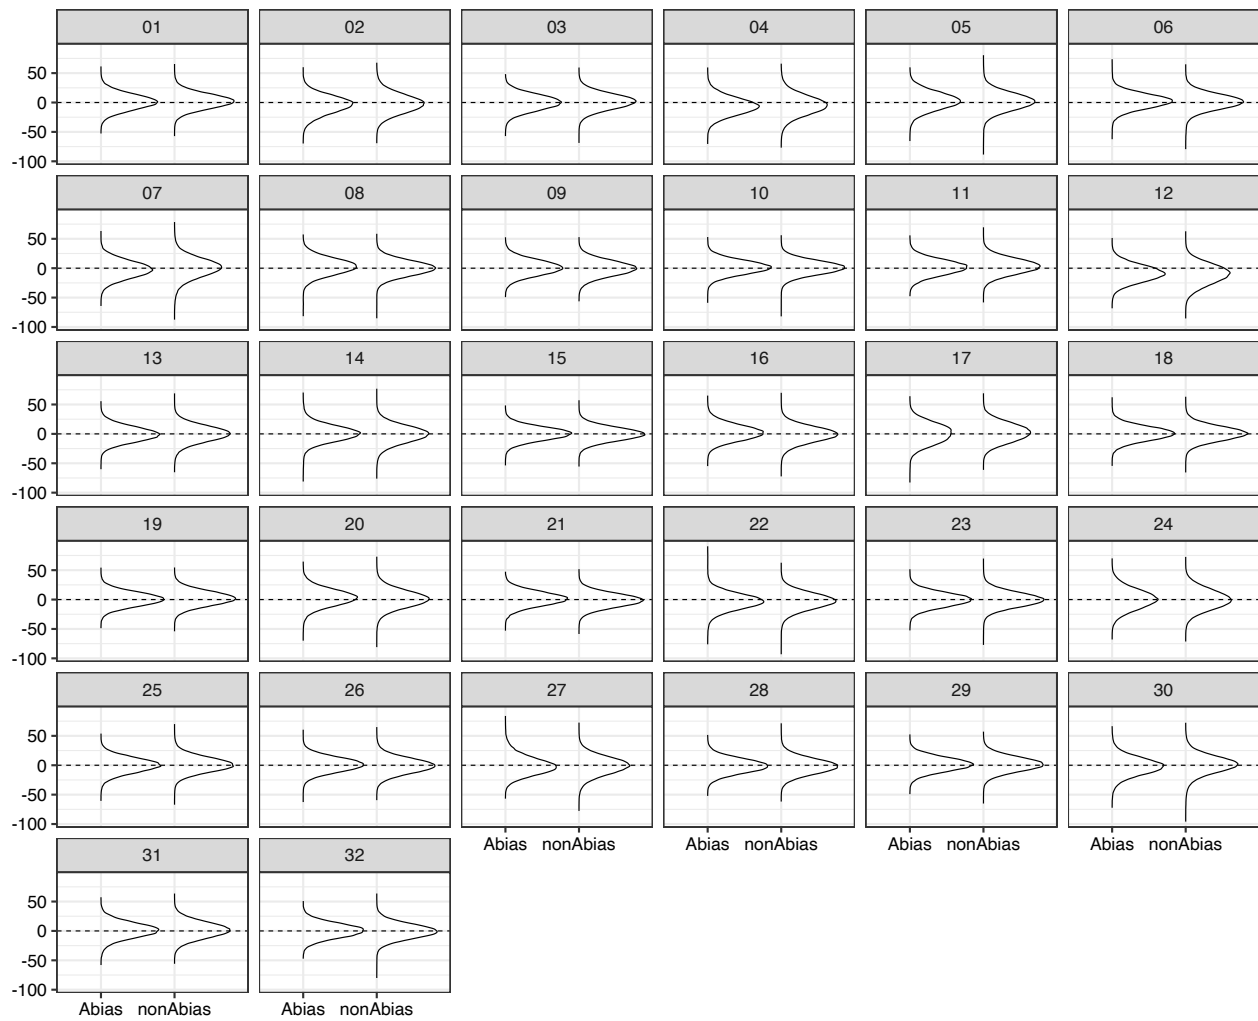

Figure S9: Basque: Residuals for each participant by condition

```
pp_df_eu %>% ggplot(aes(x = surprisal, y = residual)) +
  stat_slab(colour = 'black', size = 0.5, fill = NA) +
  geom_hline(aes(yintercept = 0), linetype = "dashed") +
  facet_wrap(~sent_id)
```

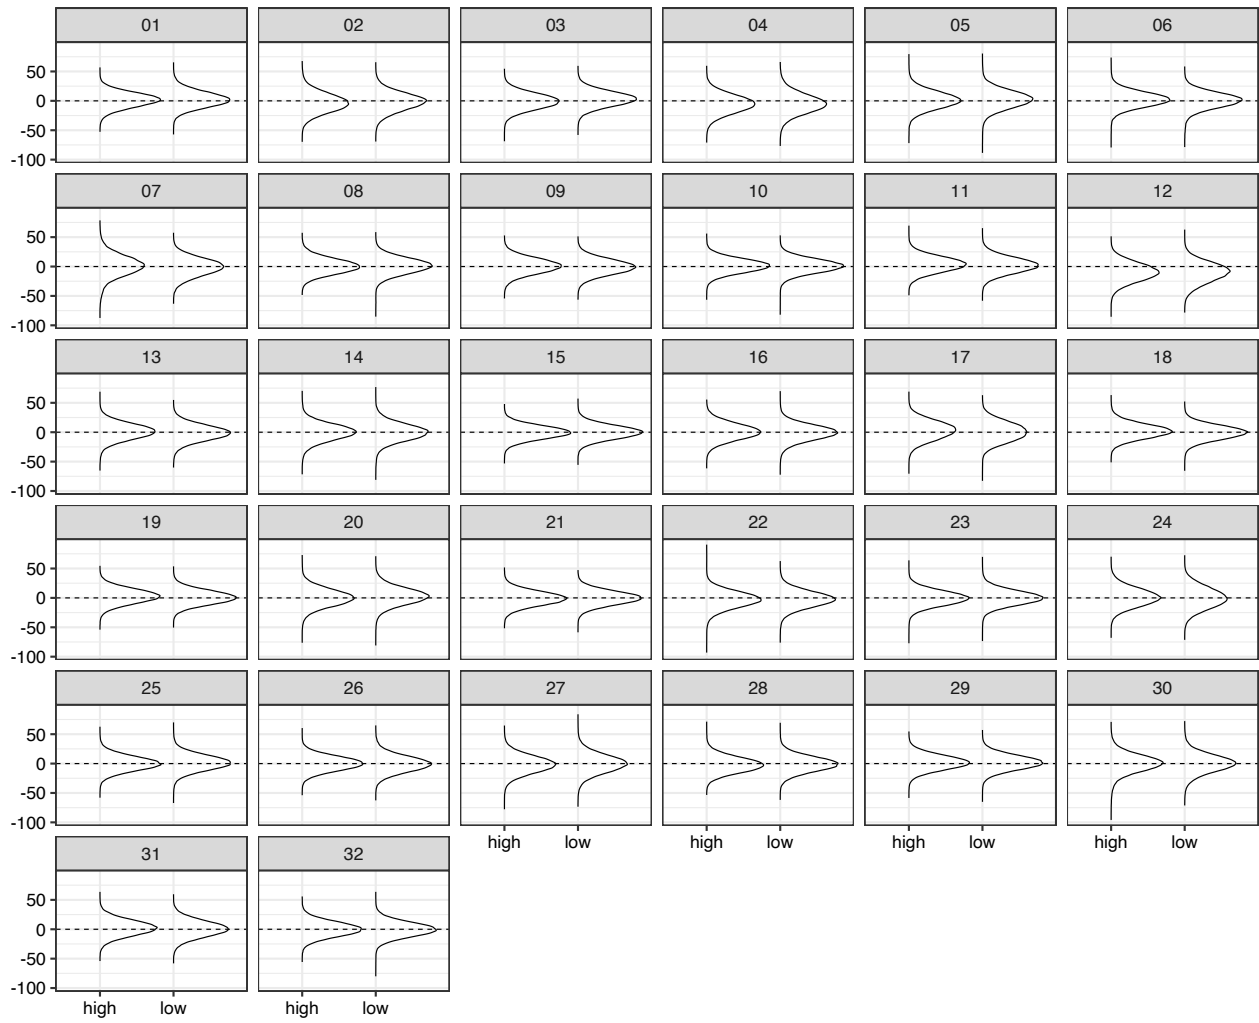

Figure S10: Basque: Residuals for each participant by surprisal

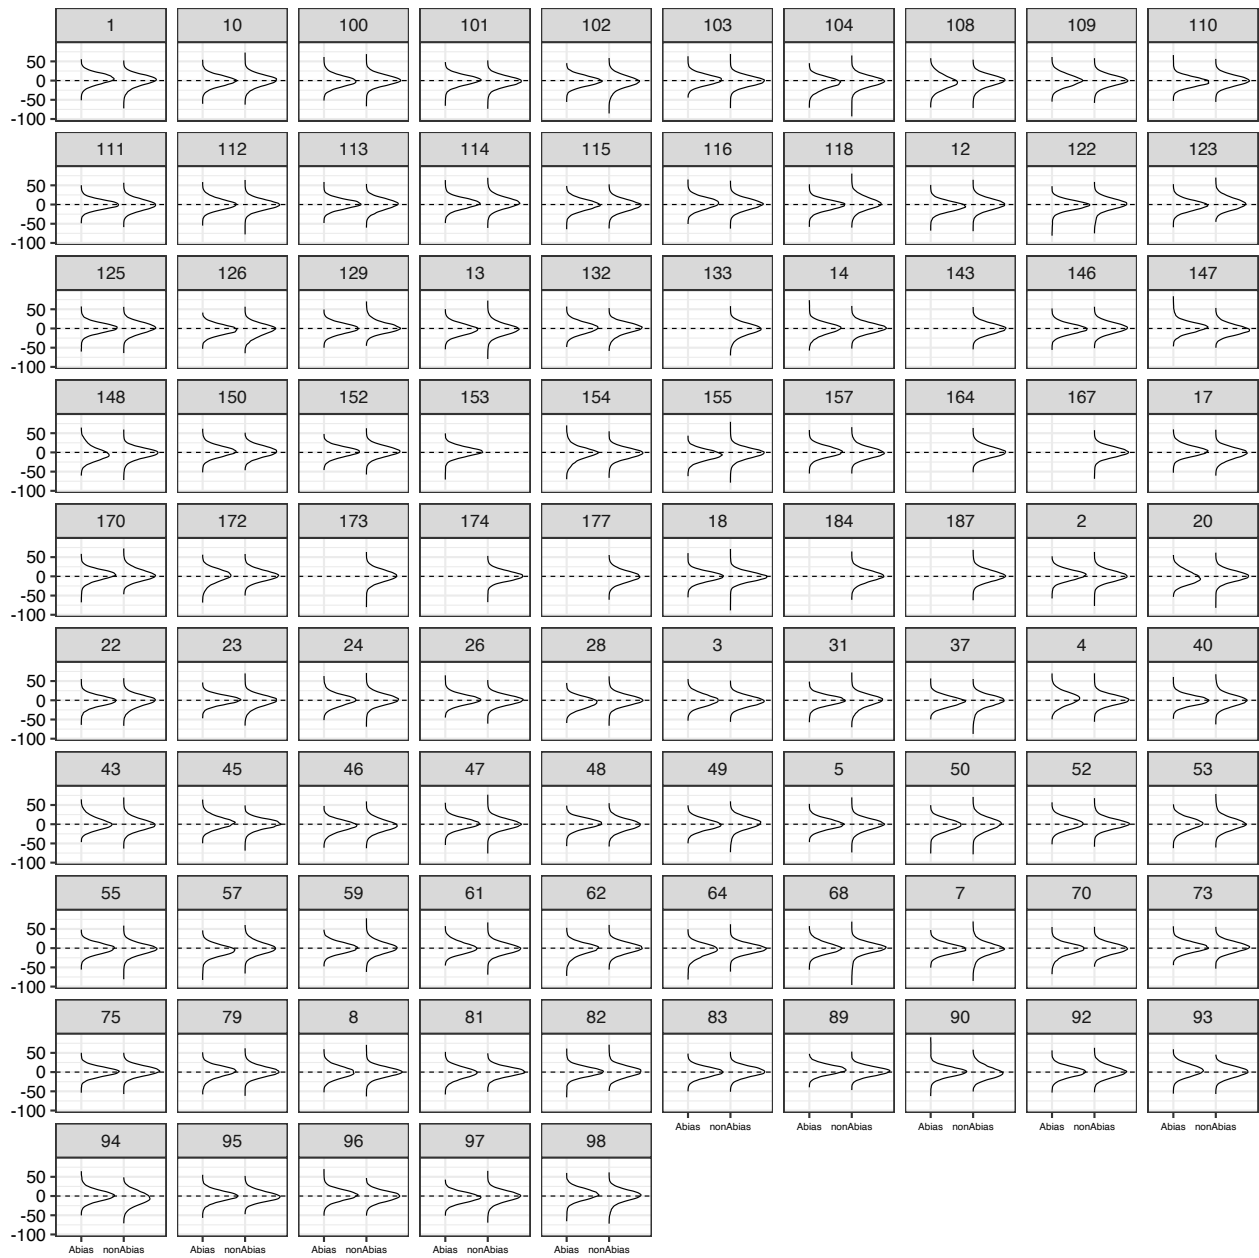

Figure S11: Basque: Residuals for each stimulus item by condition

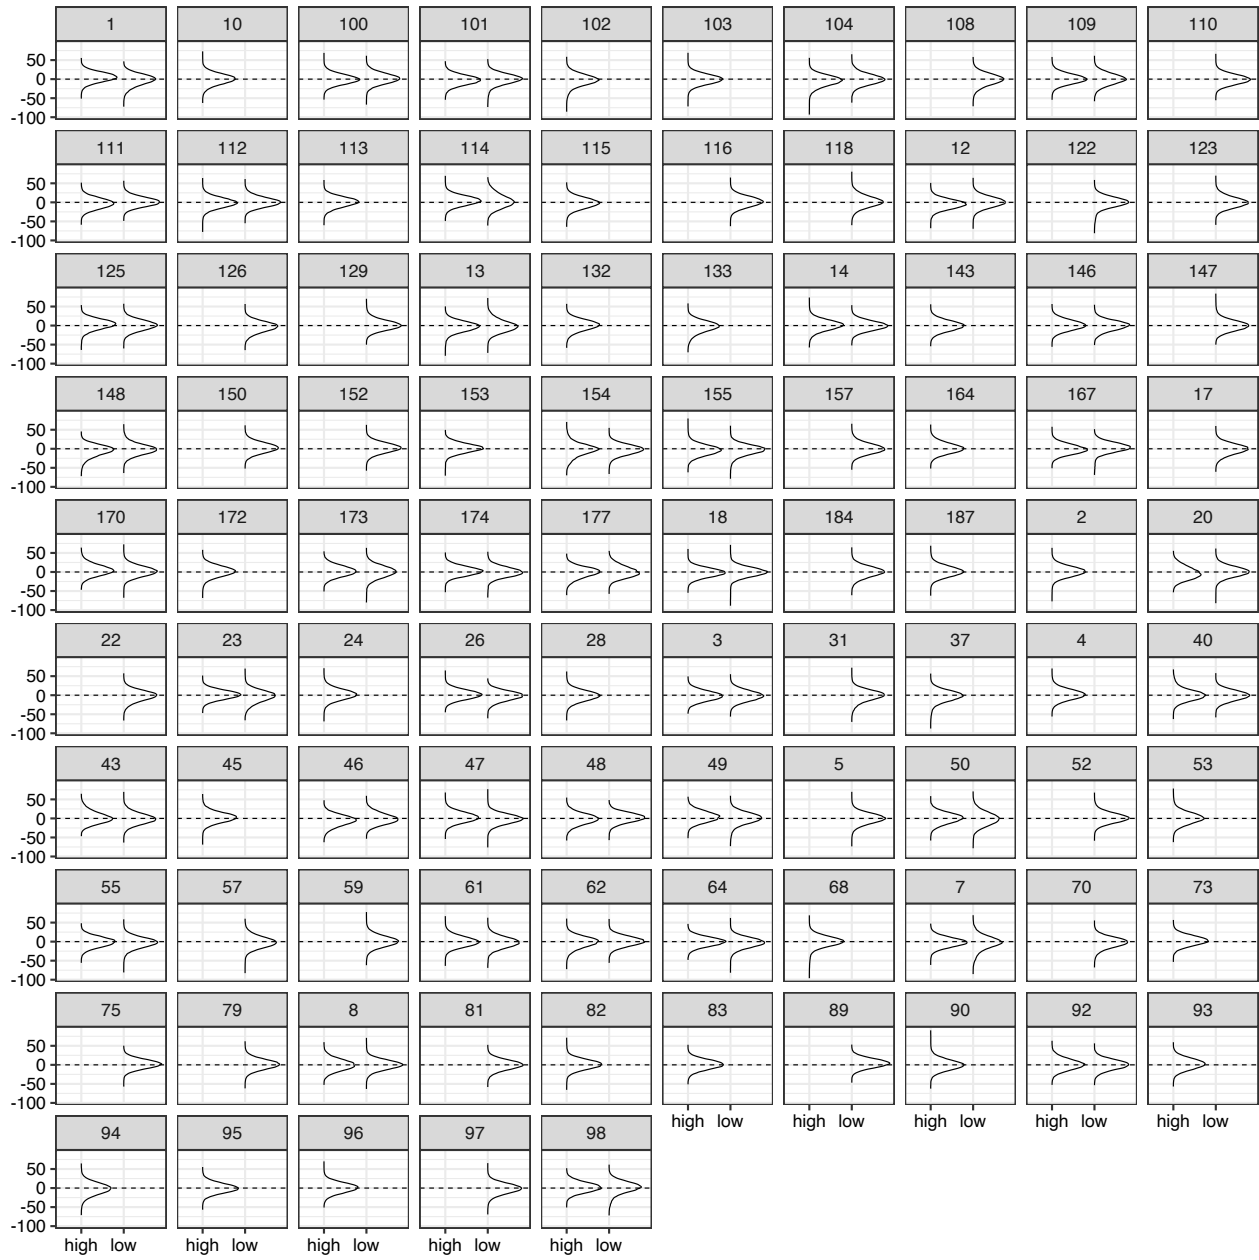

Figure S12: Basque: Residuals for each stimulus item by surprisal

## 7 Single Electrode Analyses



# |S7: Single Electrode Analysis\*

Eva Huber      Sebastian Sauppe      Arrate Isasi-Isasmendi  
Ina Bornkessel-Schlesewsky      Paola Merlo      Balthasar Bickel

August 29, 2023

## S7 Single Electrode Analysis

### S7.1 Rationale

As noted in the main text, at the spatial resolution we have, the GAM approach cannot completely separate actual trends in the EEG signal from remnant autocorrelations (Simpson 2018, *Frontiers in Ecology and Evolution*). As a robustness analysis we model here the signal in those electrodes that the GAM analysis identified as showing the strongest effects. Effects and their posterior probabilities are expected to be lower because single electrodes only capture a subset of the relevant electrophysiological signal.

### S7.2 German

```
de_data.df <- readRDS('../results/german_mv_surprisal_second.RDS')
```

---

\*This document was `rmarkdown::render`'ed from an R script 'main\_scripts/Single\_electrode\_analyses.R' available at <https://osf.io/hbj67>

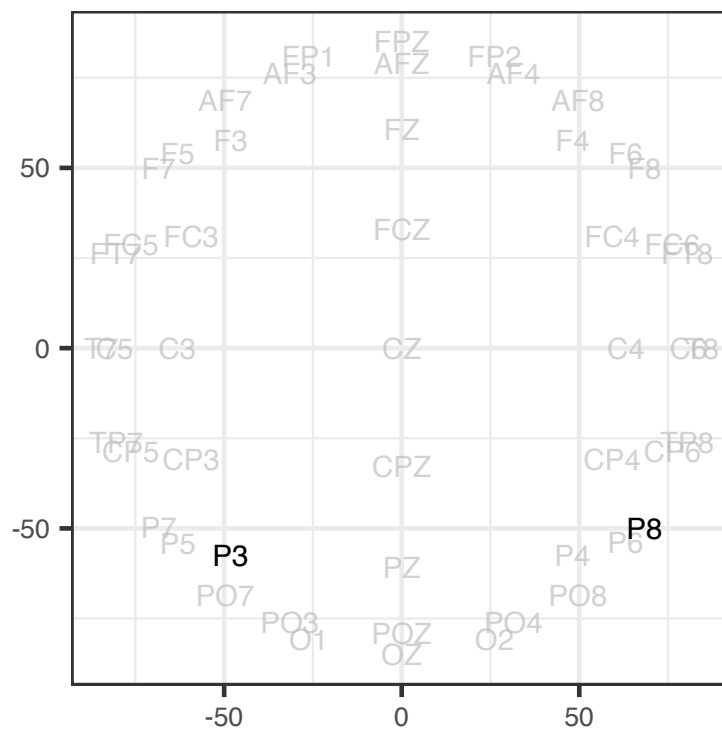

Figure S1: Electrode positions in the German experiment

```

m.de <- mV ~ surprisal.lstm.Z + condition + trial_number.Z +
  (1 + condition + surprisal.lstm.Z | Participant) +
  (1 + surprisal.lstm.Z + condition | sent_id)

de_lstm_P8.m <-
  brm(formula = m.de,
      family = gaussian(),
      data = filter(de_data.df, electrode %in% "P8"),
      file = '../models_single_electrode/de_lstm_P8',
      control = list(adapt_delta = 0.9),
      cores = detectCores()-2
  )

de_lstm_P8.m %>%
  emmeans( ~ condition, # averaging over the other conditions
           epred = T) %>%
  contrast(method = 'pairwise') %>%
  gather_emmeans_draws() %>%
  summarise(PP = mean(.value<0), meanDelta = mean(.value))

```

```

## # A tibble: 1 x 3
##   contrast          PP meanDelta
##   <chr>            <dbl>     <dbl>
## 1 Abias - nonAbias 0.821     -1.01

```

```

de_lstm_P3.m <-
  brm(formula = m.de,
      family = gaussian(),
      data = filter(de_data.df, electrode %in% "P3"),
      file = '../models_single_electrode/de_lstm_P3',
      control = list(adapt_delta = 0.9),
      cores = detectCores()-2
  )

de_lstm_P3.m %>%
  emmeans( ~ surprisal.lstm.Z,
           at = list(surprisal.lstm.Z = c(2, -2)),
           epred = T) %>%
  contrast(method = 'pairwise') %>%
  gather_emmeans_draws() %>%
  summarise(PP = mean(.value<0), meanDelta = mean(.value))

```

```

## # A tibble: 1 x 3
##   contrast          PP meanDelta
##   <chr>            <dbl>     <dbl>
## 1 surprisal.lstm.Z2 - (surprisal.lstm.Z-2) 0.982     -5.71

```

## S7.3 Hindi

```
hi_data.df <- readRDS('../results/hindi_mv_surprisal_0506.RDS')
```

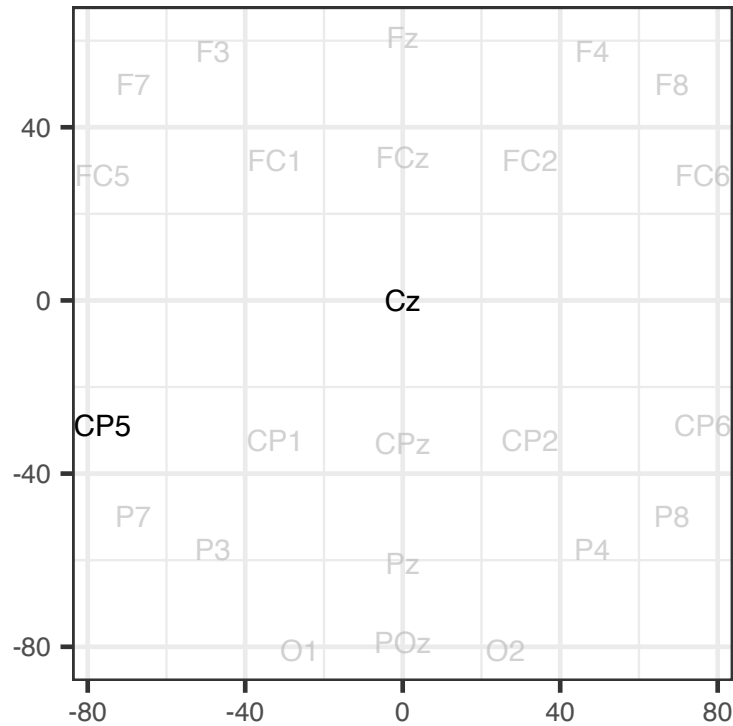

Figure S2: Electrode positions in the Hindi experiment

```
m.hi <- mV ~ surprisal.tr.Z + condition + trial_number.Z +  
  (1 + condition + surprisal.tr.Z | Participant) +  
  (1 + surprisal.tr.Z + condition | sent_id)  
  
hi_tr_Cz.m <-  
  brm(formula = m.hi,  
       family = gaussian(),  
       data = filter(hi_data.df, electrode %in% "Cz"),  
       file = '../models_single_electrode/hi_tr_Cz',  
       control = list(adapt_delta = 0.9),  
       cores = detectCores()-2  
  )  
  
hi_tr_Cz.m %>%  
  emmeans( ~ condition, # averaging over the other conditions  
           epred = T) %>%  
  contrast(method = 'pairwise') %>%  
  gather_emmeans_draws() %>%  
  summarise(PP = mean(.value<0), meanDelta = mean(.value))  
  
## # A tibble: 1 x 3  
##   contrast          PP meanDelta
```

```
## <chr> <dbl> <dbl>
## 1 Abias - nonAbias 0.849 -0.489
```

```
hi_tr_CP5.m <-
  brm(formula = m.hi,
       family = gaussian(),
       data = filter(hi_data.df, electrode %in% "CP5"),
       file = '../models_single_electrode/hi_tr_CP5',
       control = list(adapt_delta = 0.9),
       cores = detectCores()-2
  )

hi_tr_CP5.m %>%
  emmeans( ~ surprisal.tr.Z,
           at = list(surprisal.tr.Z = c(2, -2)),
           epred = T) %>%
  contrast(method = 'pairwise') %>%
  gather_emmeans_draws() %>%
  summarise(PP = mean(.value<0), meanDelta = mean(.value))
```

```
## # A tibble: 1 x 3
##   contrast                PP meanDelta
##   <chr>                  <dbl>    <dbl>
## 1 surprisal.tr.Z2 - (surprisal.tr.Z-2) 0.980    -1.65
```

## S7.4 Basque

```
eu_data.df <- readRDS('../results/basque_mv_surprisal_new.RDS')
```

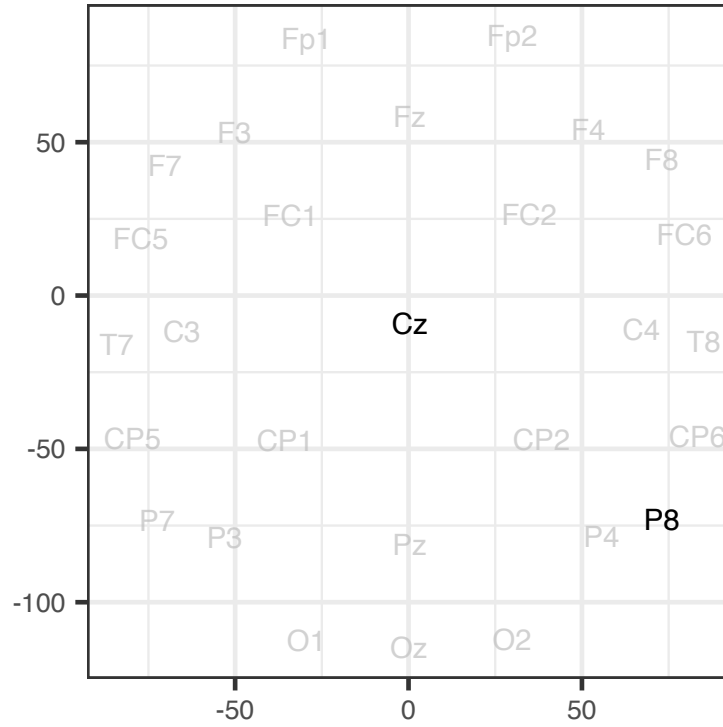

Figure S3: Electrode positions in the Basque experiment

```

m.eu <- mV ~ surprisal.tr.Z + condition + trial_number.Z +
  (1 + condition + surprisal.tr.Z | Participant) +
  (1 + surprisal.tr.Z + condition | sent_id)

eu_tr_Cz.m <-
  brm(formula = m.eu,
      family = gaussian(),
      data = filter(eu_data.df, electrode %in% "Cz"),
      file = '../models_single_electrode/eu_tr_Cz',
      control = list(adapt_delta = 0.9),
      cores = detectCores()-2
  )

eu_tr_Cz.m %>%
  emmeans( ~ condition, # averaging over the other conditions
           epred = T) %>%
  contrast(method = 'pairwise') %>%
  gather_emmeans_draws() %>%
  summarise(PP = mean(.value<0), meanDelta = mean(.value))

```

```

## # A tibble: 1 x 3
##   contrast          PP meanDelta
##   <chr>             <dbl>     <dbl>
## 1 Abias - nonAbias 0.972     -0.963

```

```

eu_tr_P8.m <-
  brm(formula = m.eu,
      family = gaussian(),
      data = filter(eu_data.df, electrode %in% "P8"),
      file = '../models_single_electrode/eu_tr_P8',
      control = list(adapt_delta = 0.96),
      cores = detectCores()-2
  )

eu_tr_P8.m %>%
  emmeans( ~ surprisal.tr.Z,
           at = list(surprisal.tr.Z = c(2, -2)),
           epred = T) %>%
  contrast(method = 'pairwise') %>%
  gather_emmeans_draws() %>%
  summarise(PP = mean(.value<0), meanDelta = mean(.value))

```

```

## # A tibble: 1 x 3
##   contrast          PP meanDelta
##   <chr>             <dbl>     <dbl>
## 1 surprisal.tr.Z2 - (surprisal.tr.Z-2) 0.987     -1.76

```
